# Supplementary figures and images for: Ice crystal c-axis orientation and mean grain size measurements from the Dome Summit South ice core, Law Dome, East Antarctica (part 1 of 2)
Source: Copernicus journal article supplement (doi:10.5194/essd-2015-45), 2016-01-19

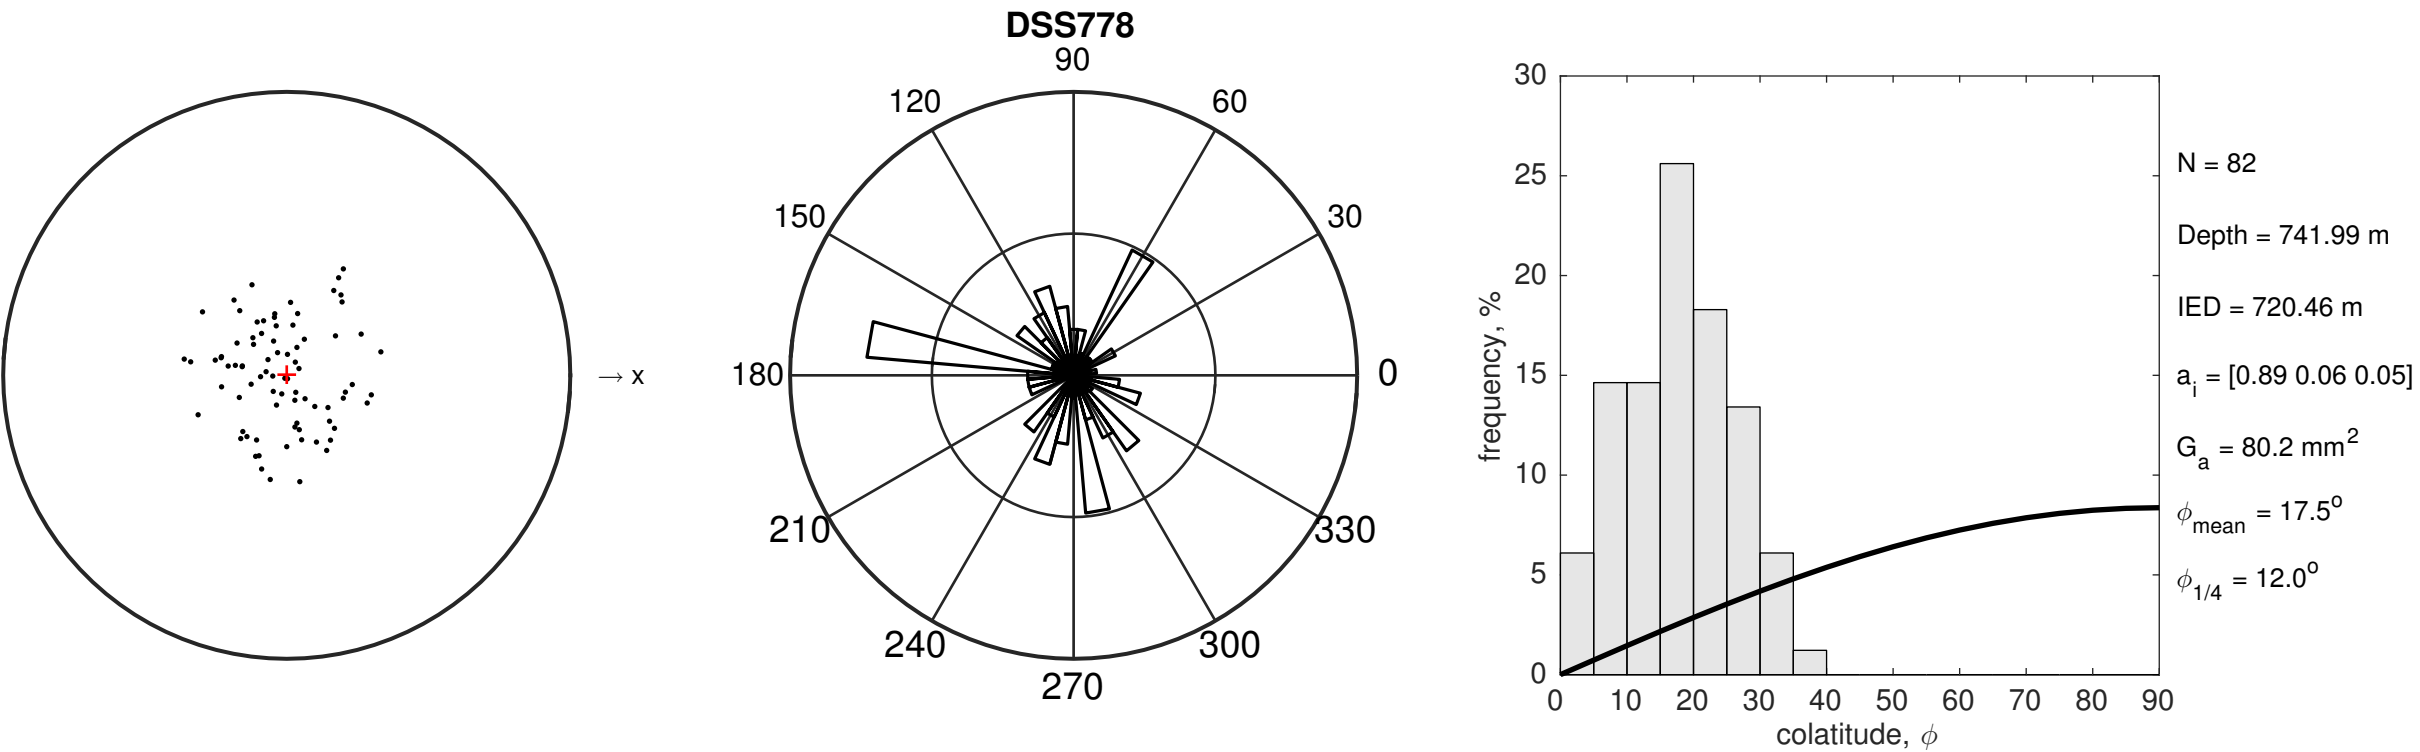

Supplement: Supplementary file 1 [file essd-2015-45-supplement.zip]

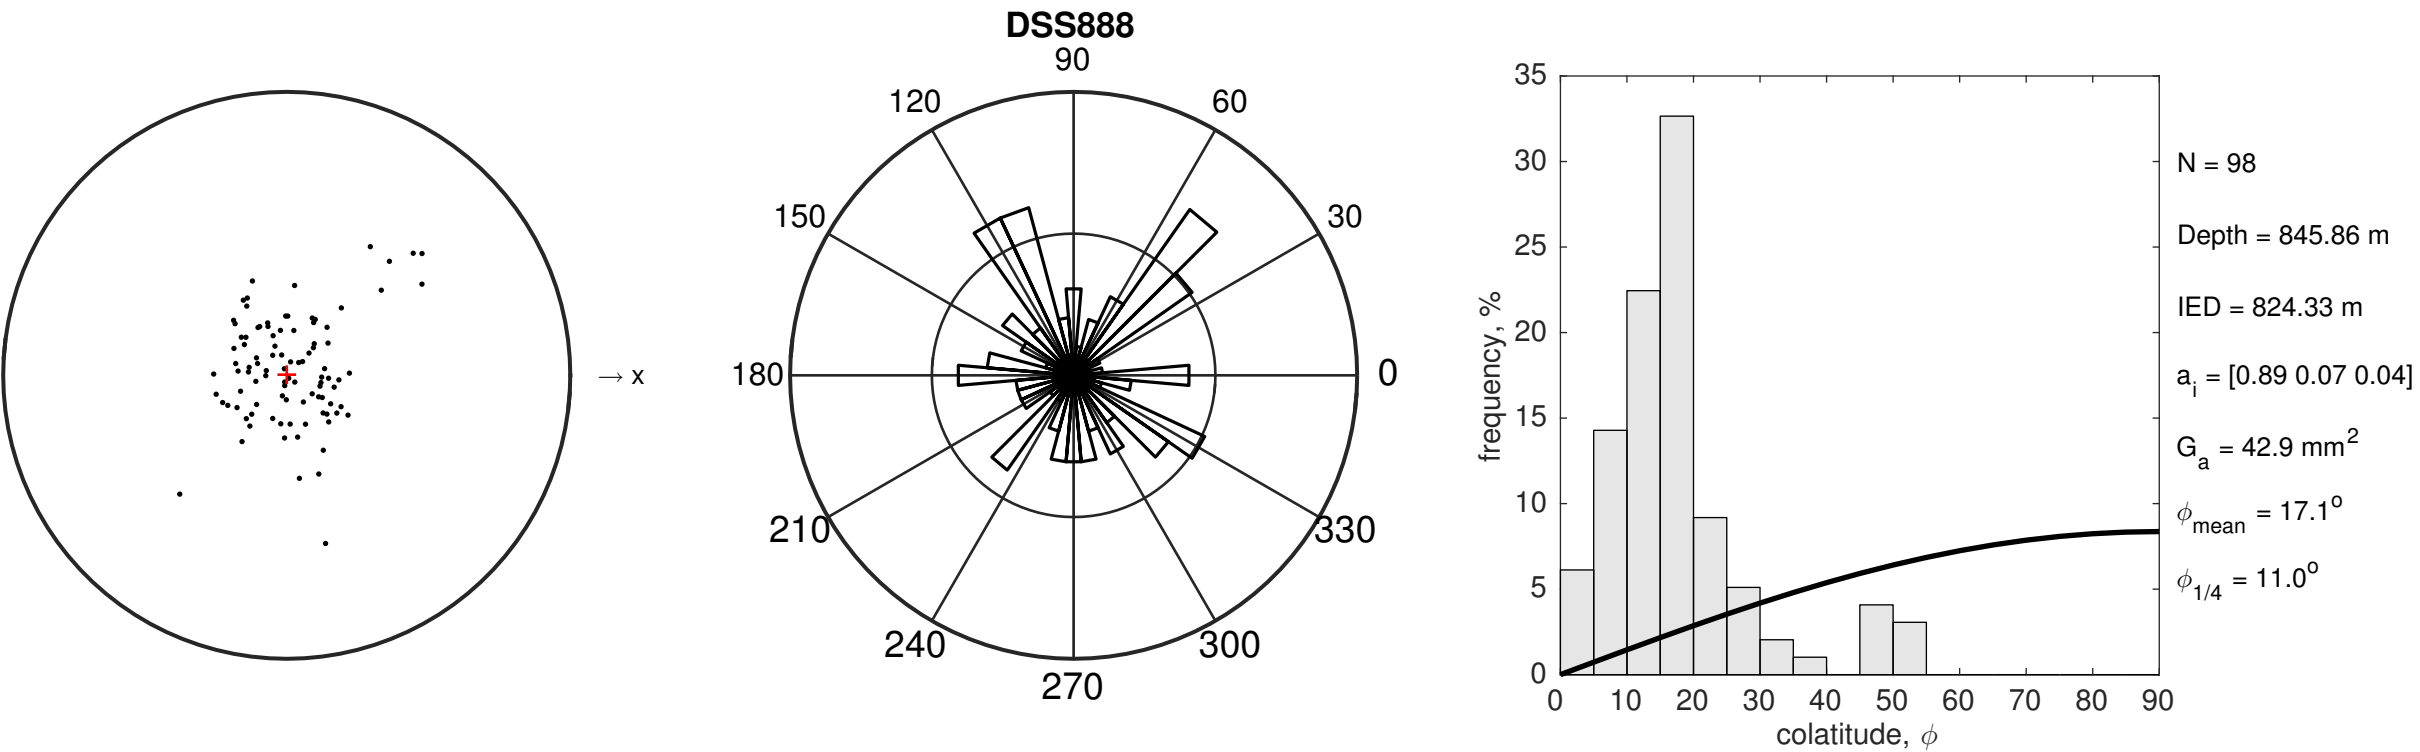

Supplement: Supplementary file 2 [file essd-2015-45-supplement.zip]

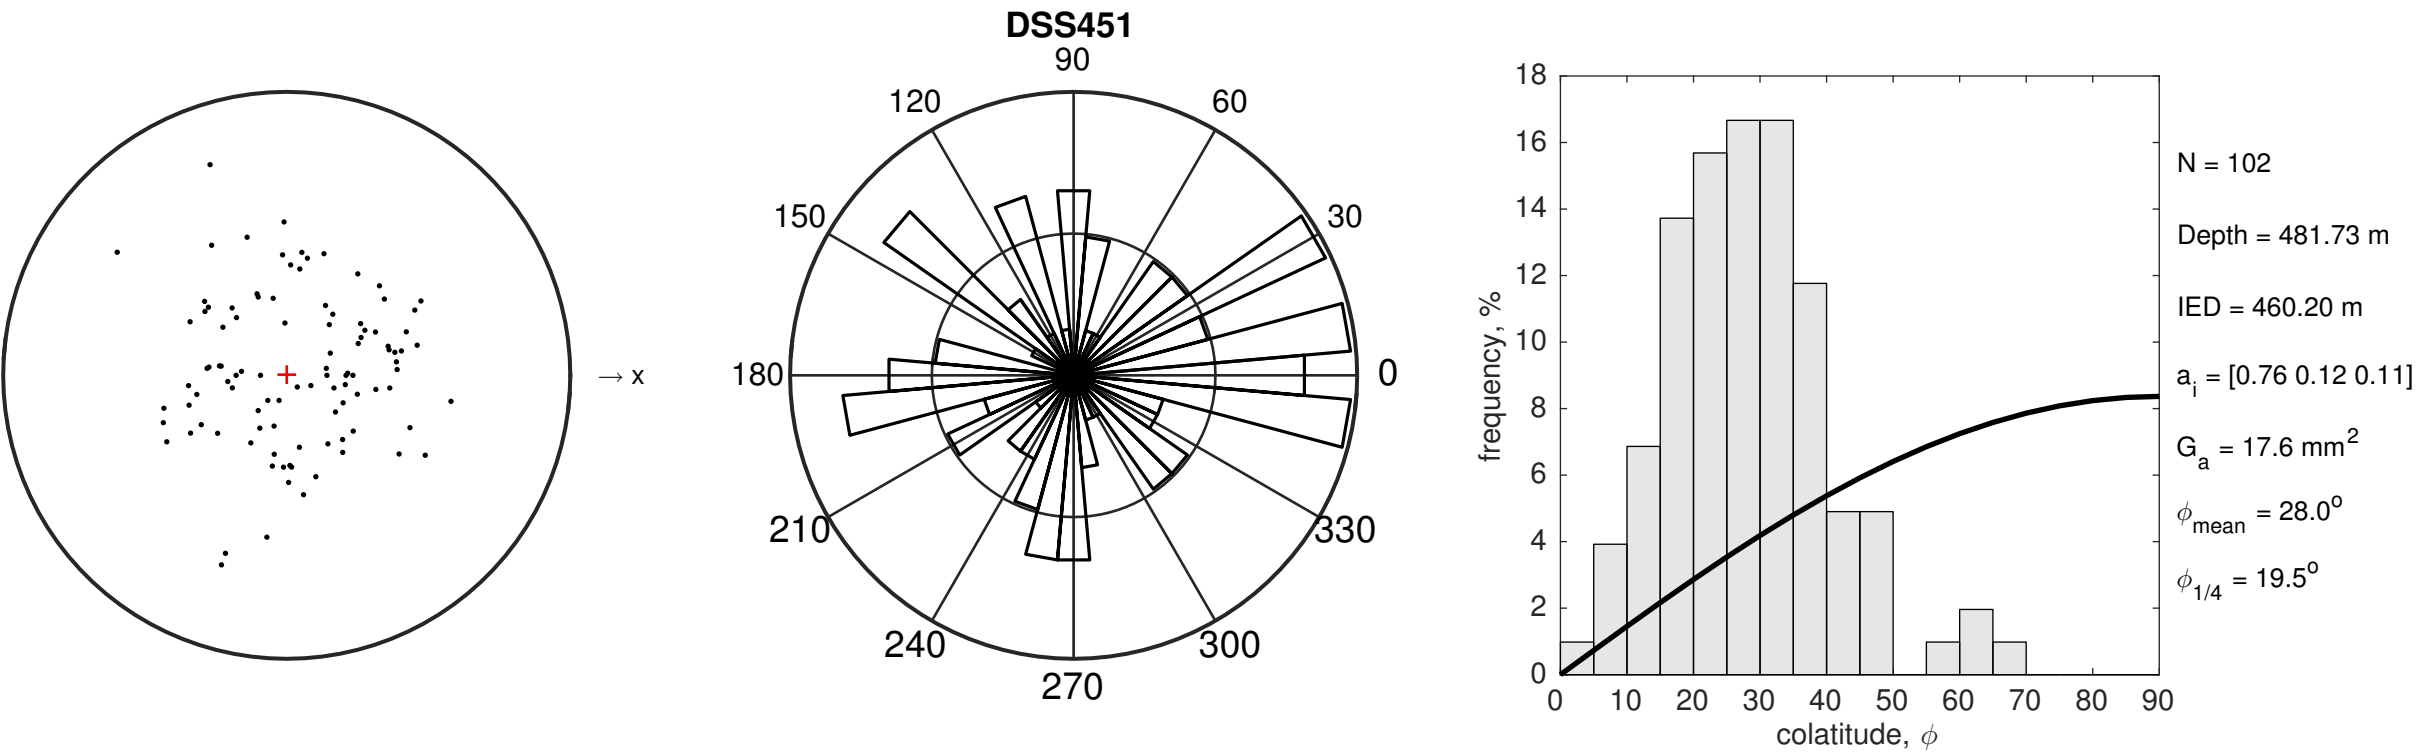

Supplement: Supplementary file 3 [file essd-2015-45-supplement.zip]

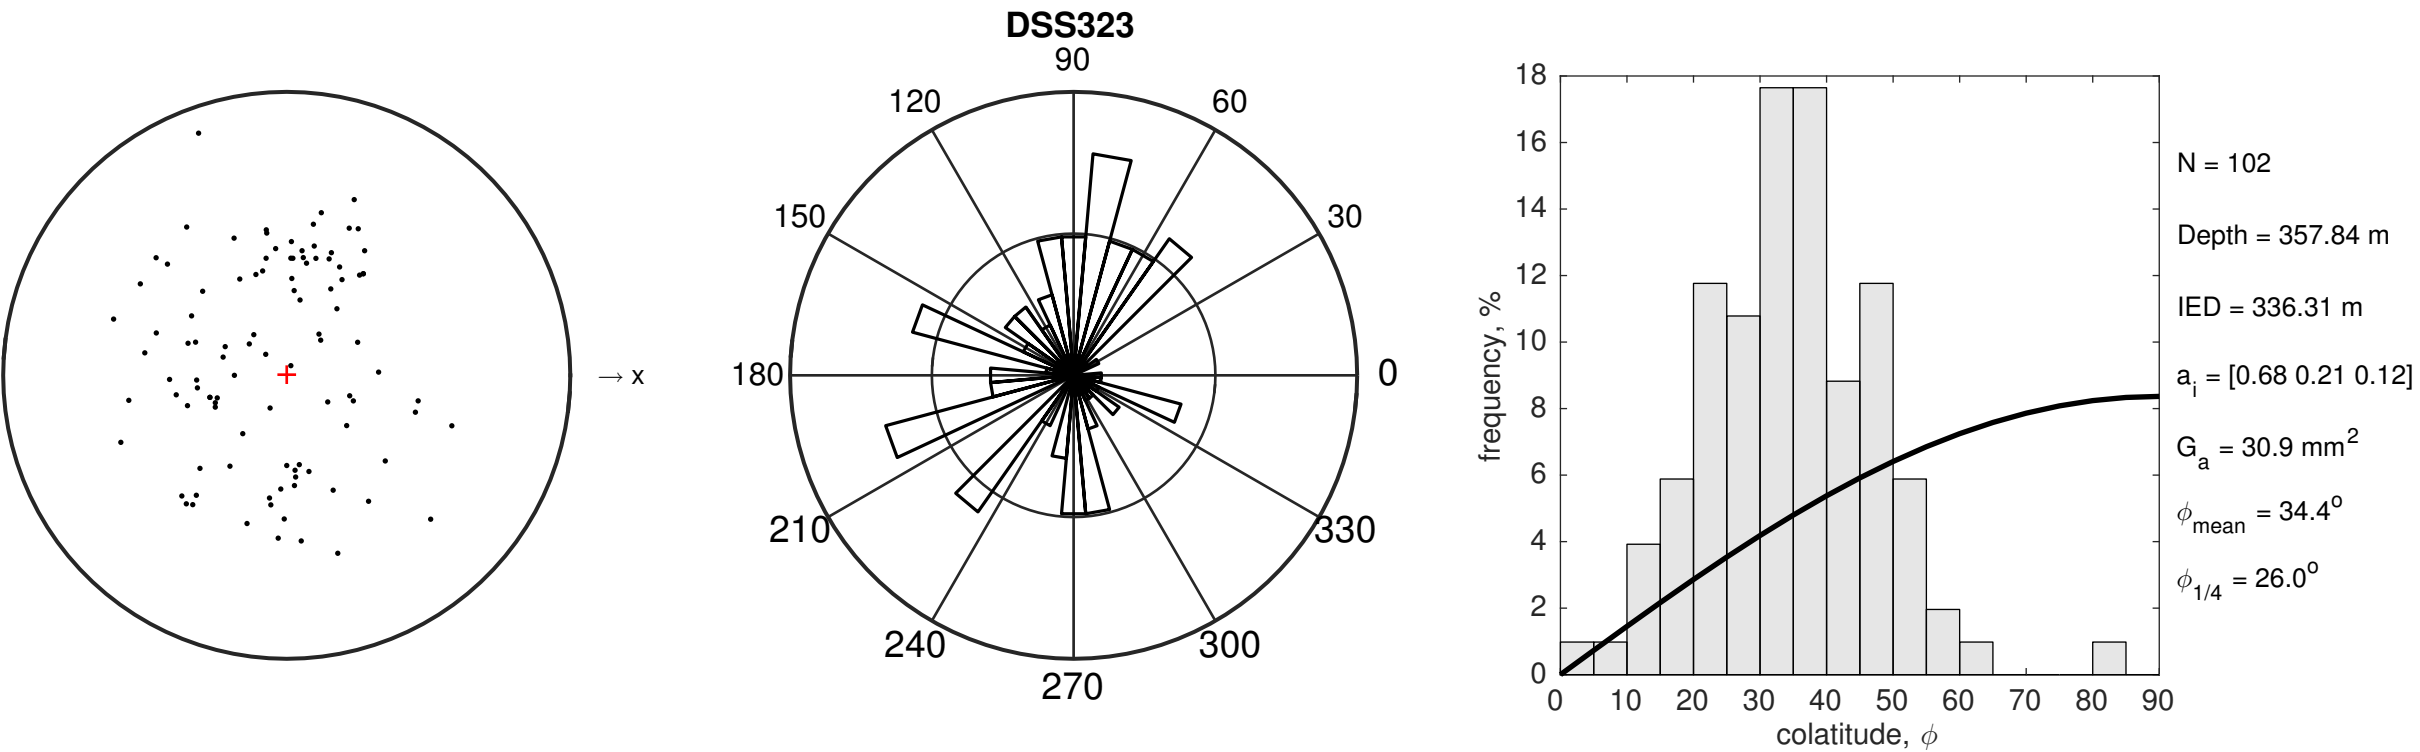

Supplement: Supplementary file 4 [file essd-2015-45-supplement.zip]

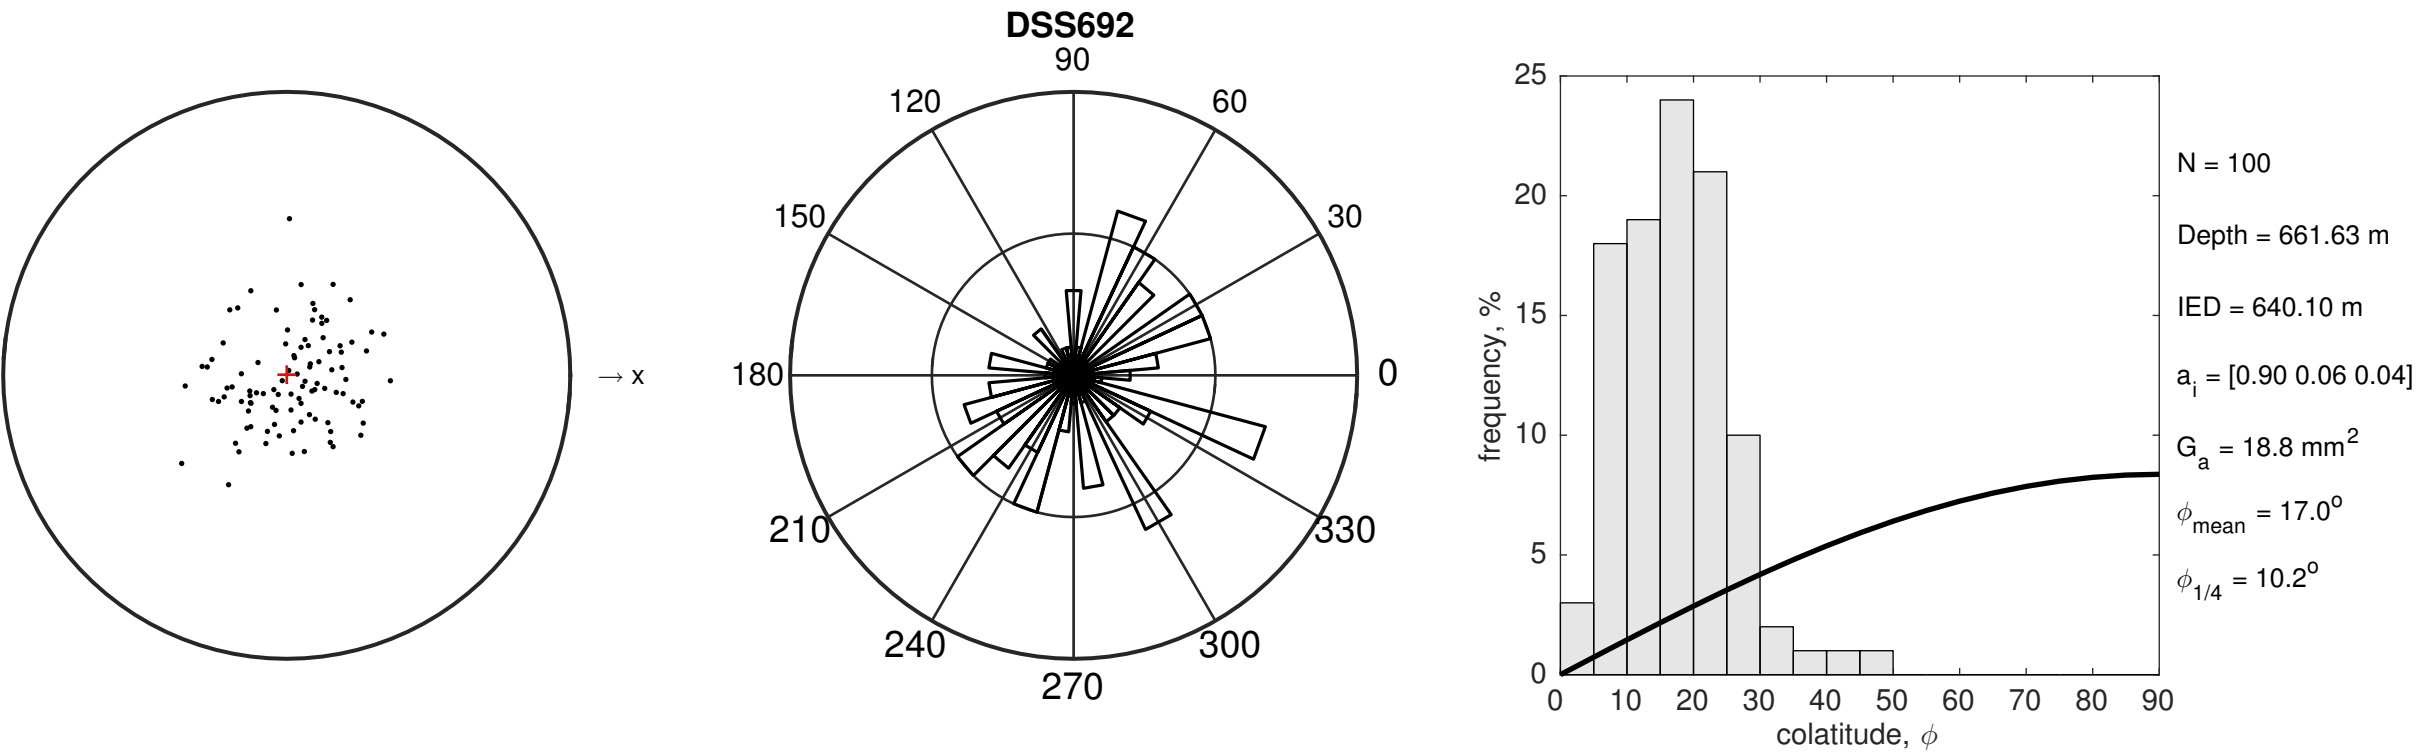

Supplement: Supplementary file 5 [file essd-2015-45-supplement.zip]

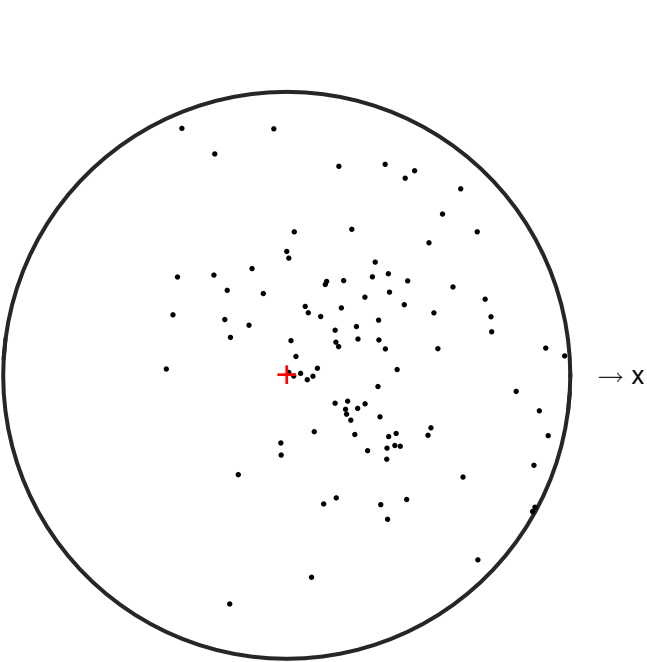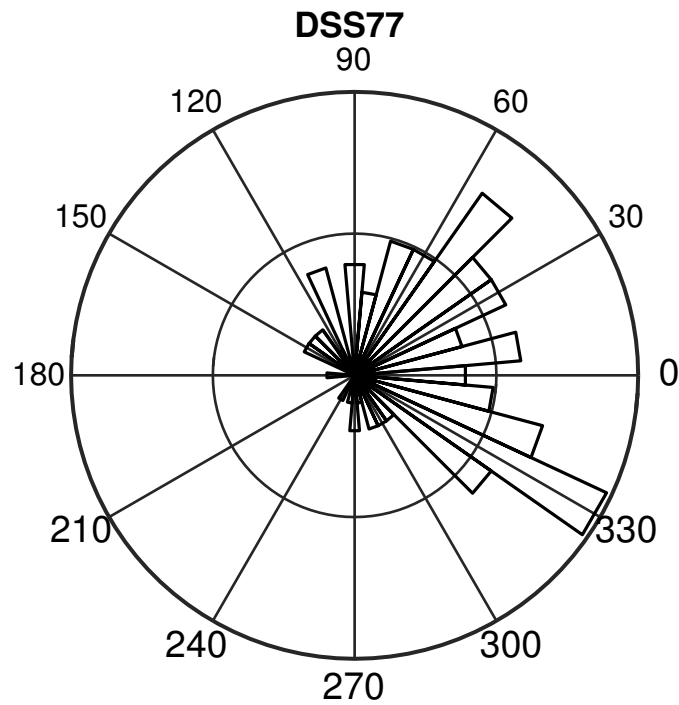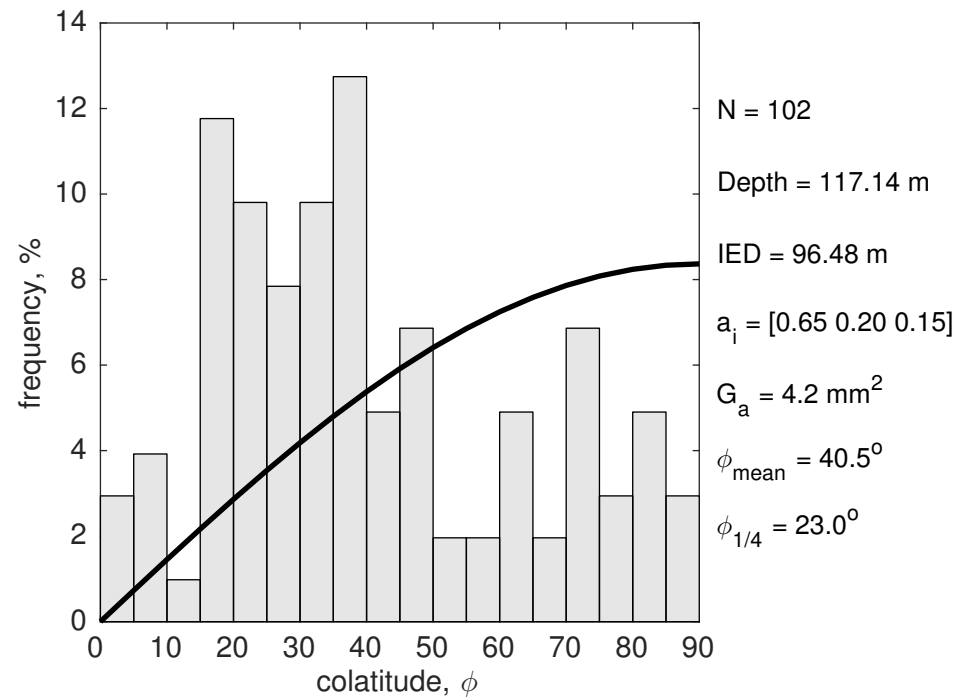

Supplement: Supplementary file 6 [file essd-2015-45-supplement.zip]

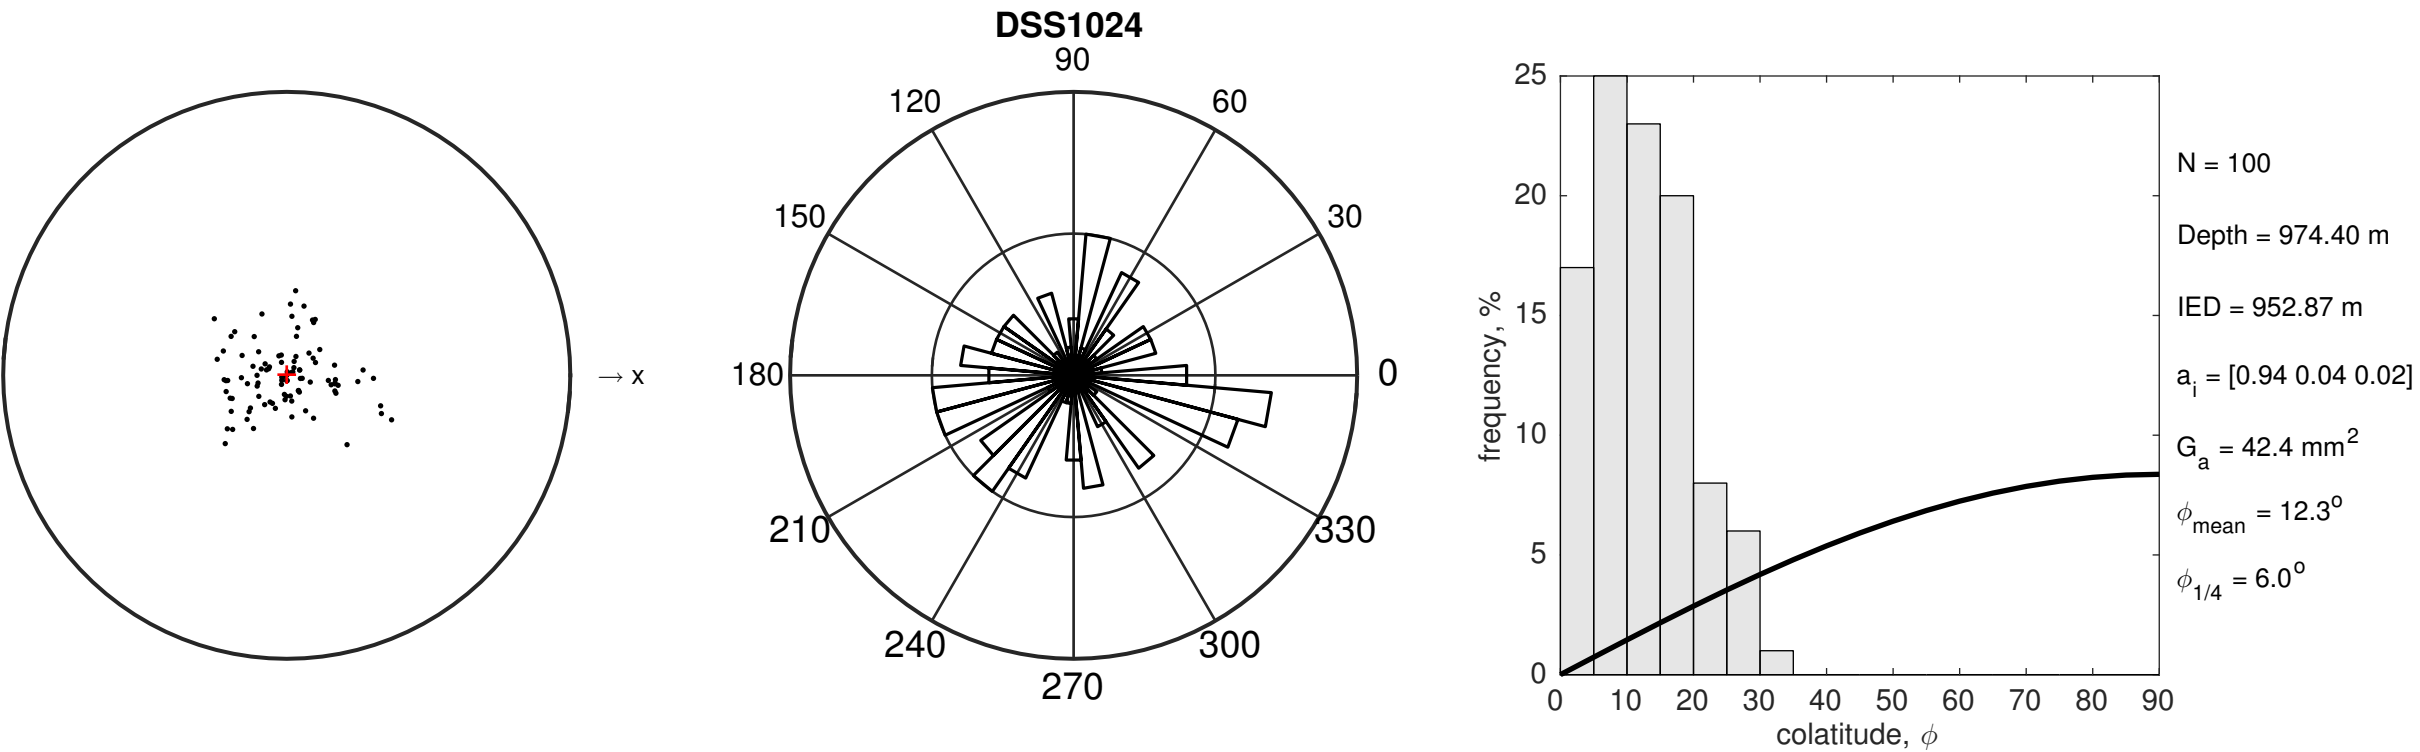

Supplement: Supplementary file 7 [file essd-2015-45-supplement.zip]

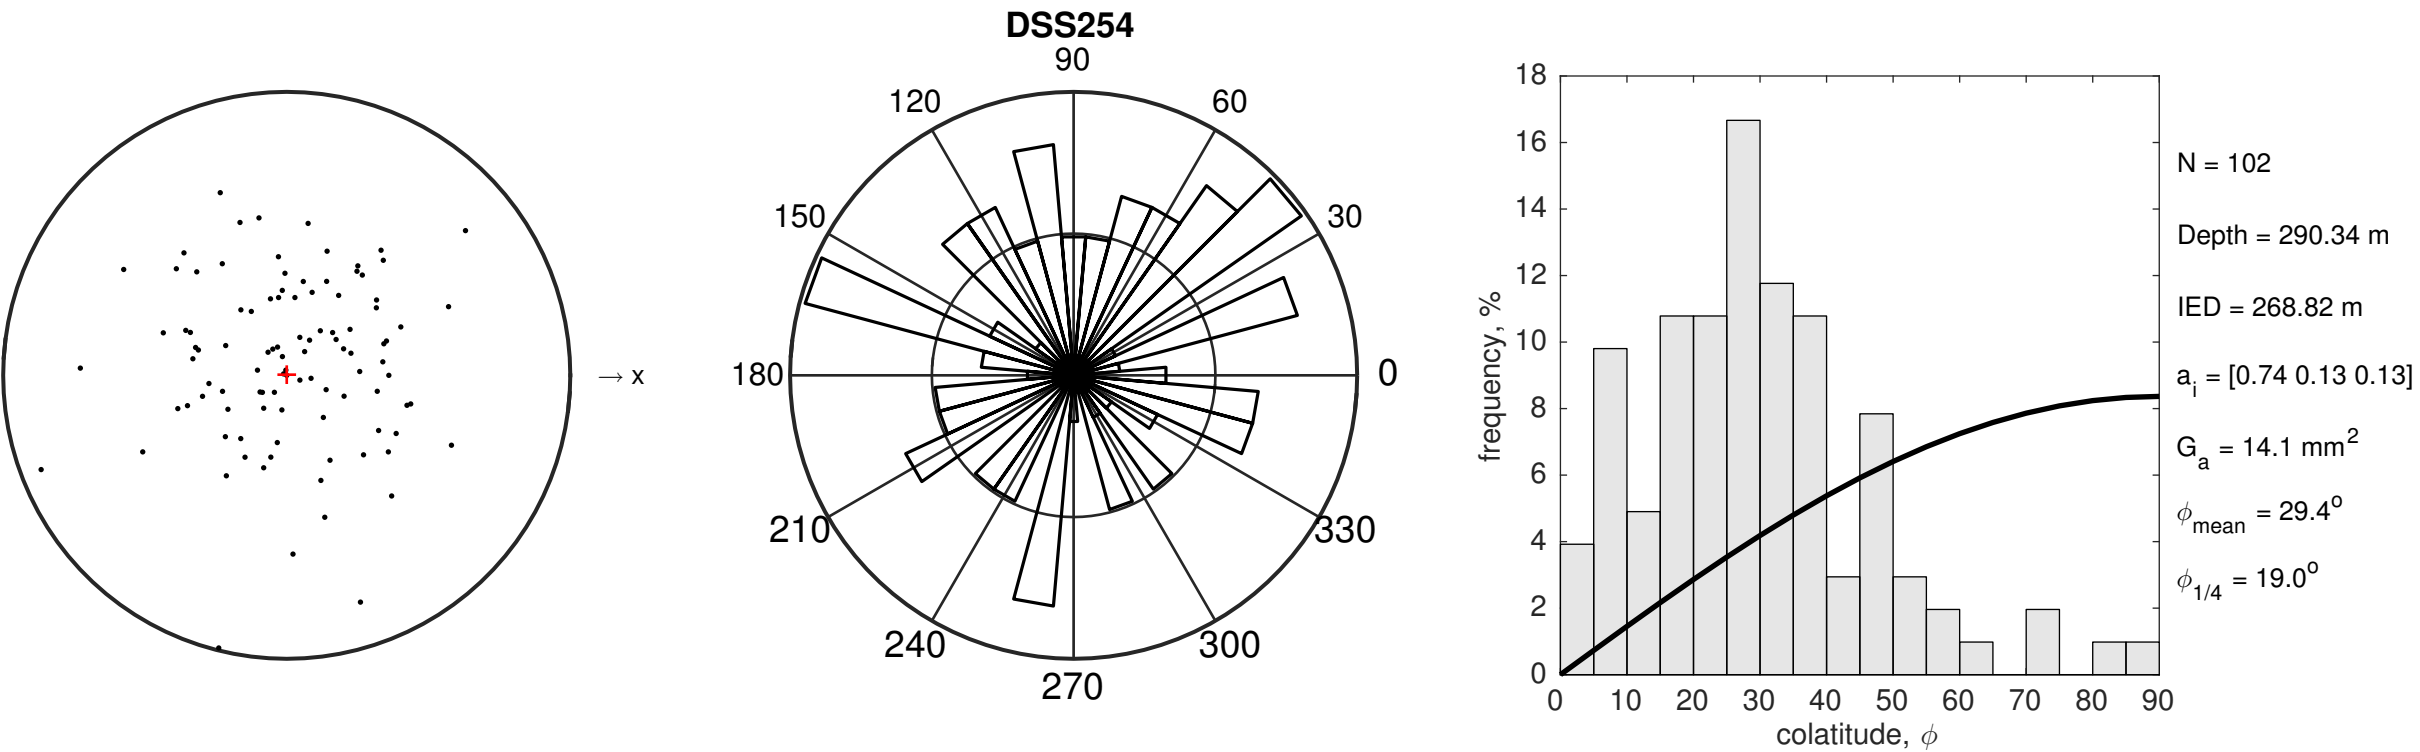

Supplement: Supplementary file 8 [file essd-2015-45-supplement.zip]

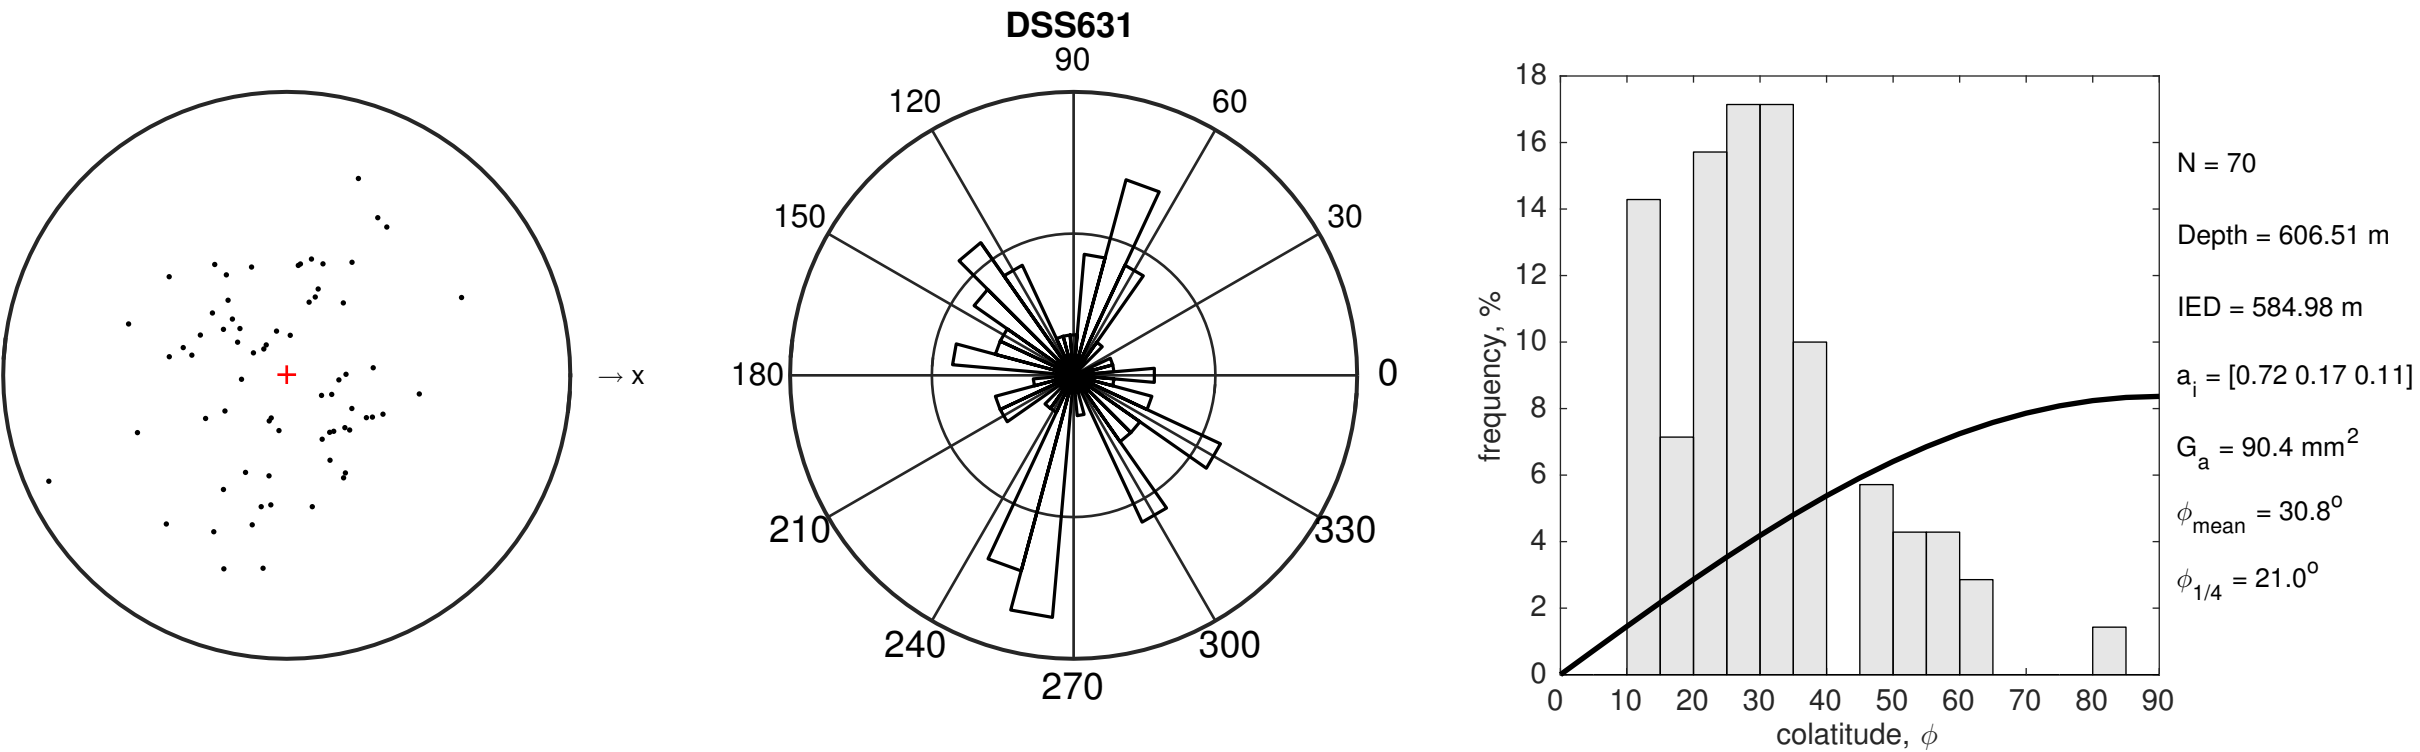

Supplement: Supplementary file 9 [file essd-2015-45-supplement.zip]

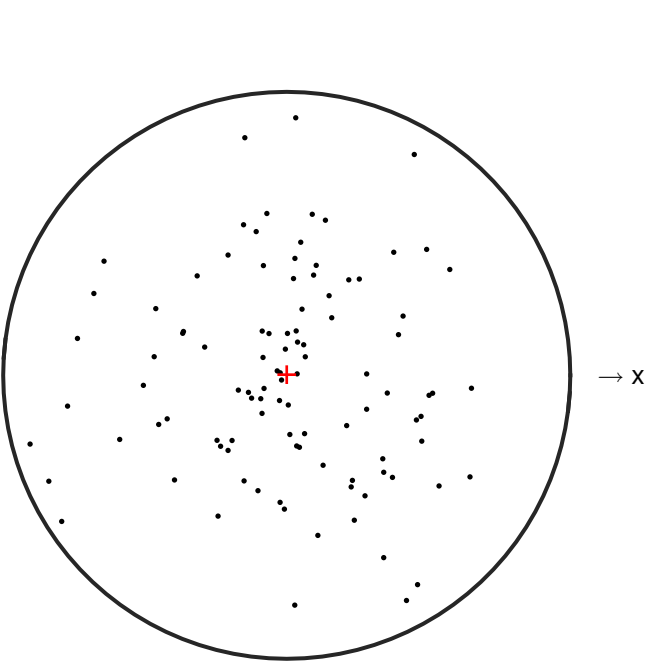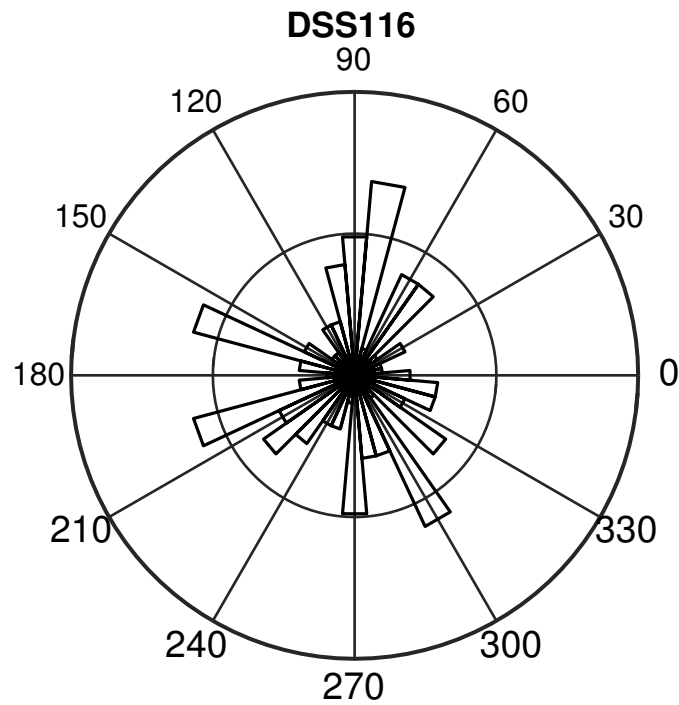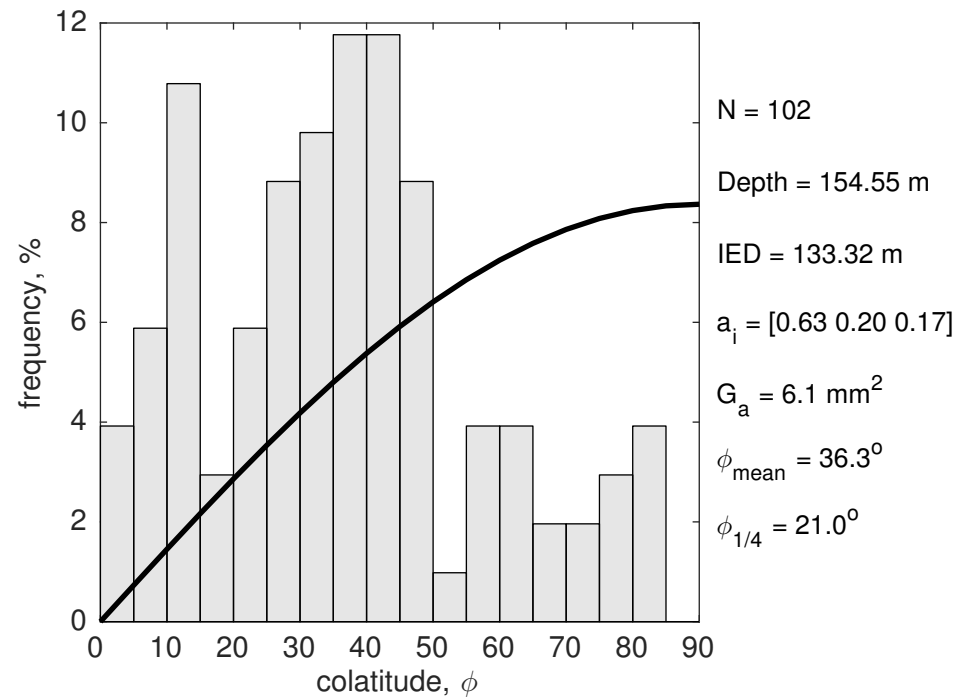

Supplement: Supplementary file 10 [file essd-2015-45-supplement.zip]

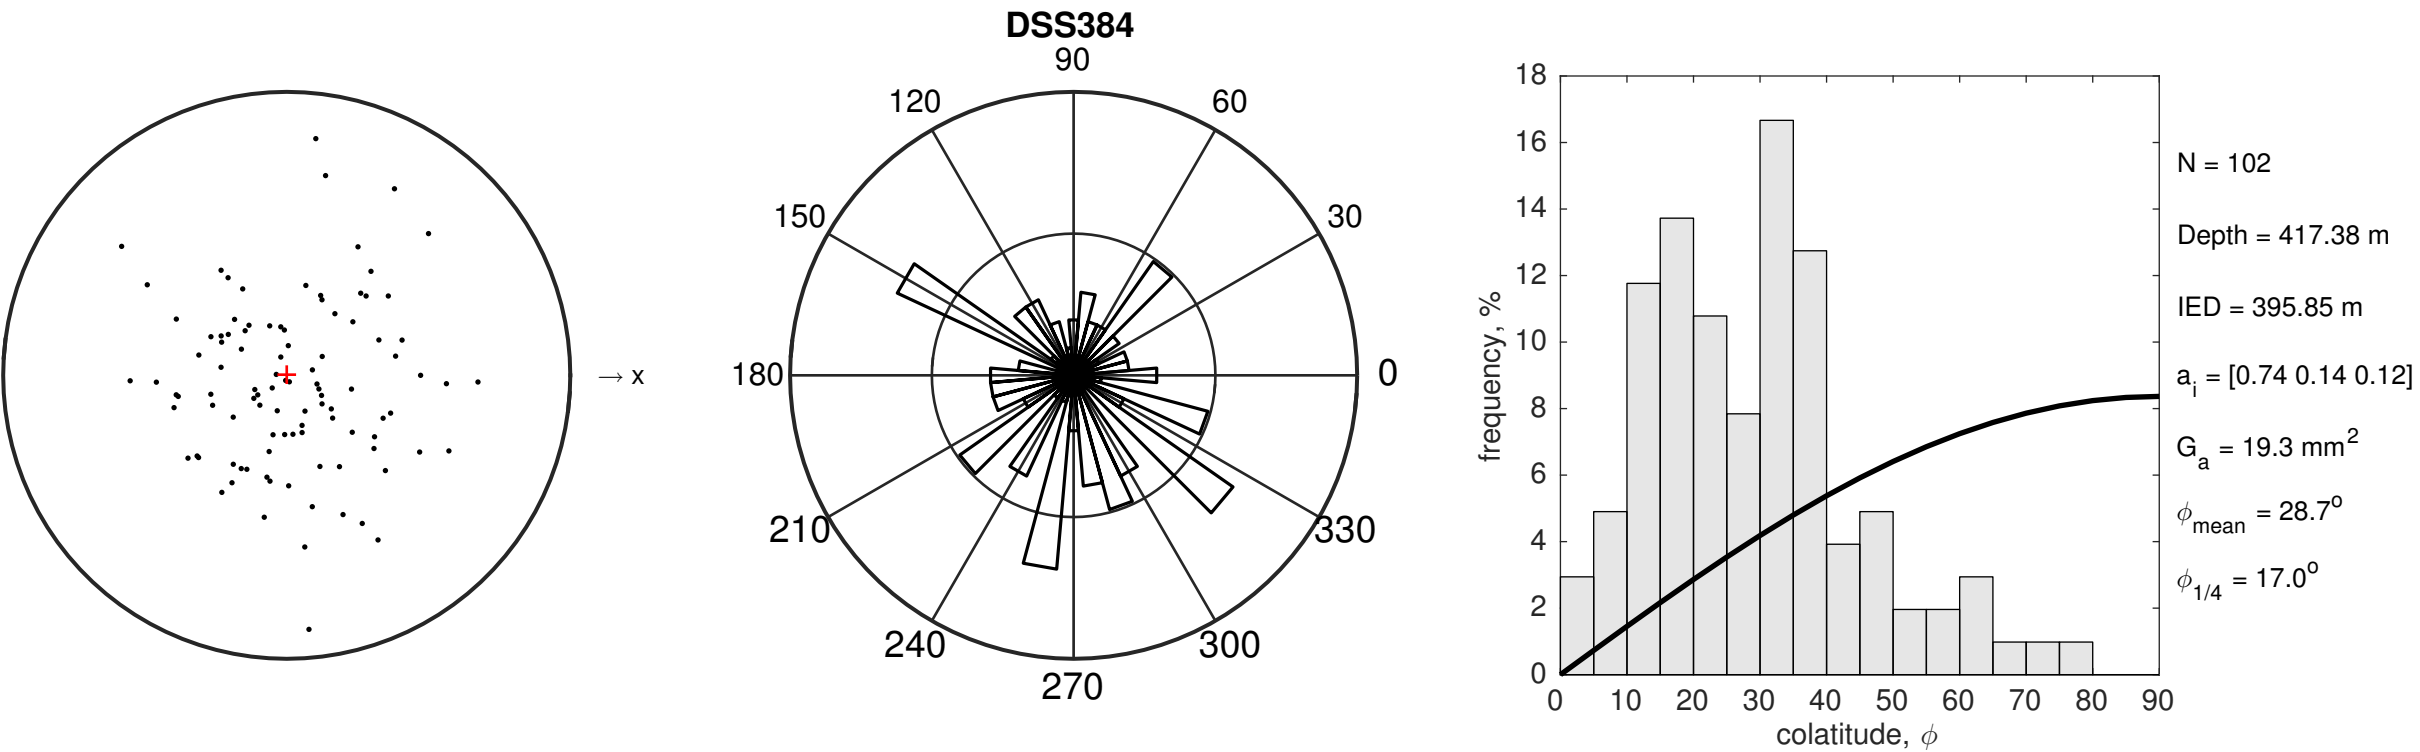

Supplement: Supplementary file 11 [file essd-2015-45-supplement.zip]

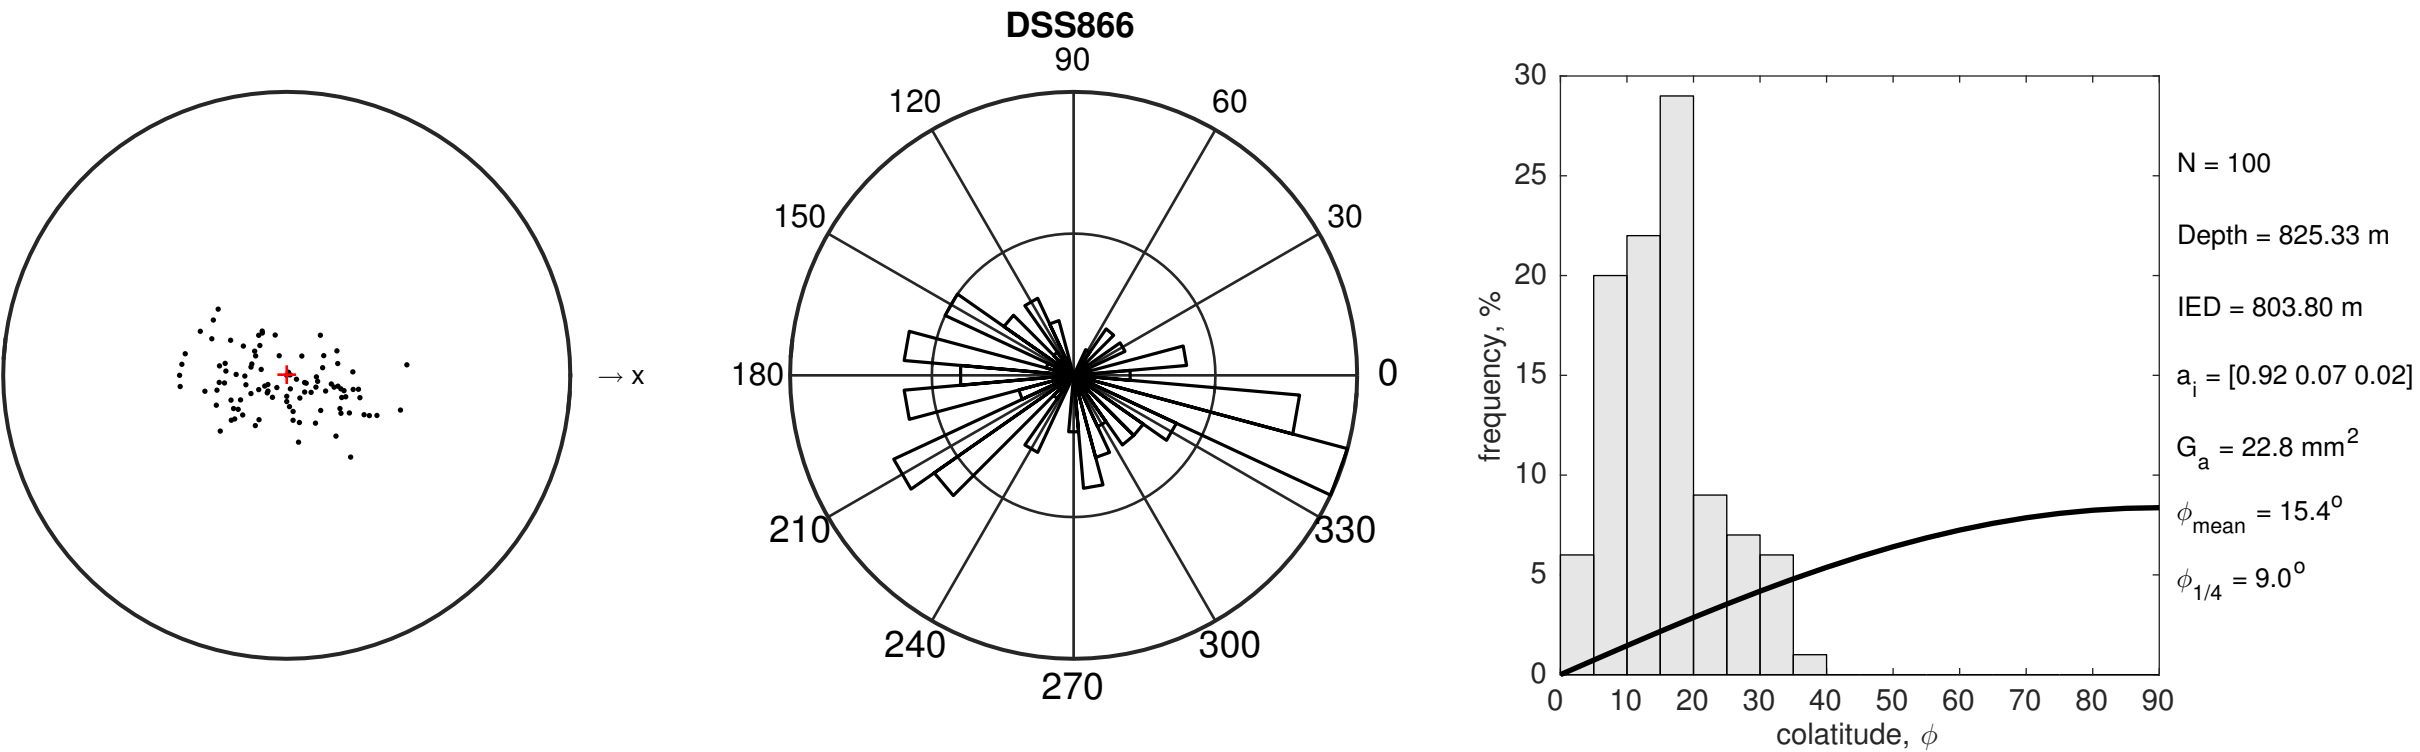

Supplement: Supplementary file 12 [file essd-2015-45-supplement.zip]

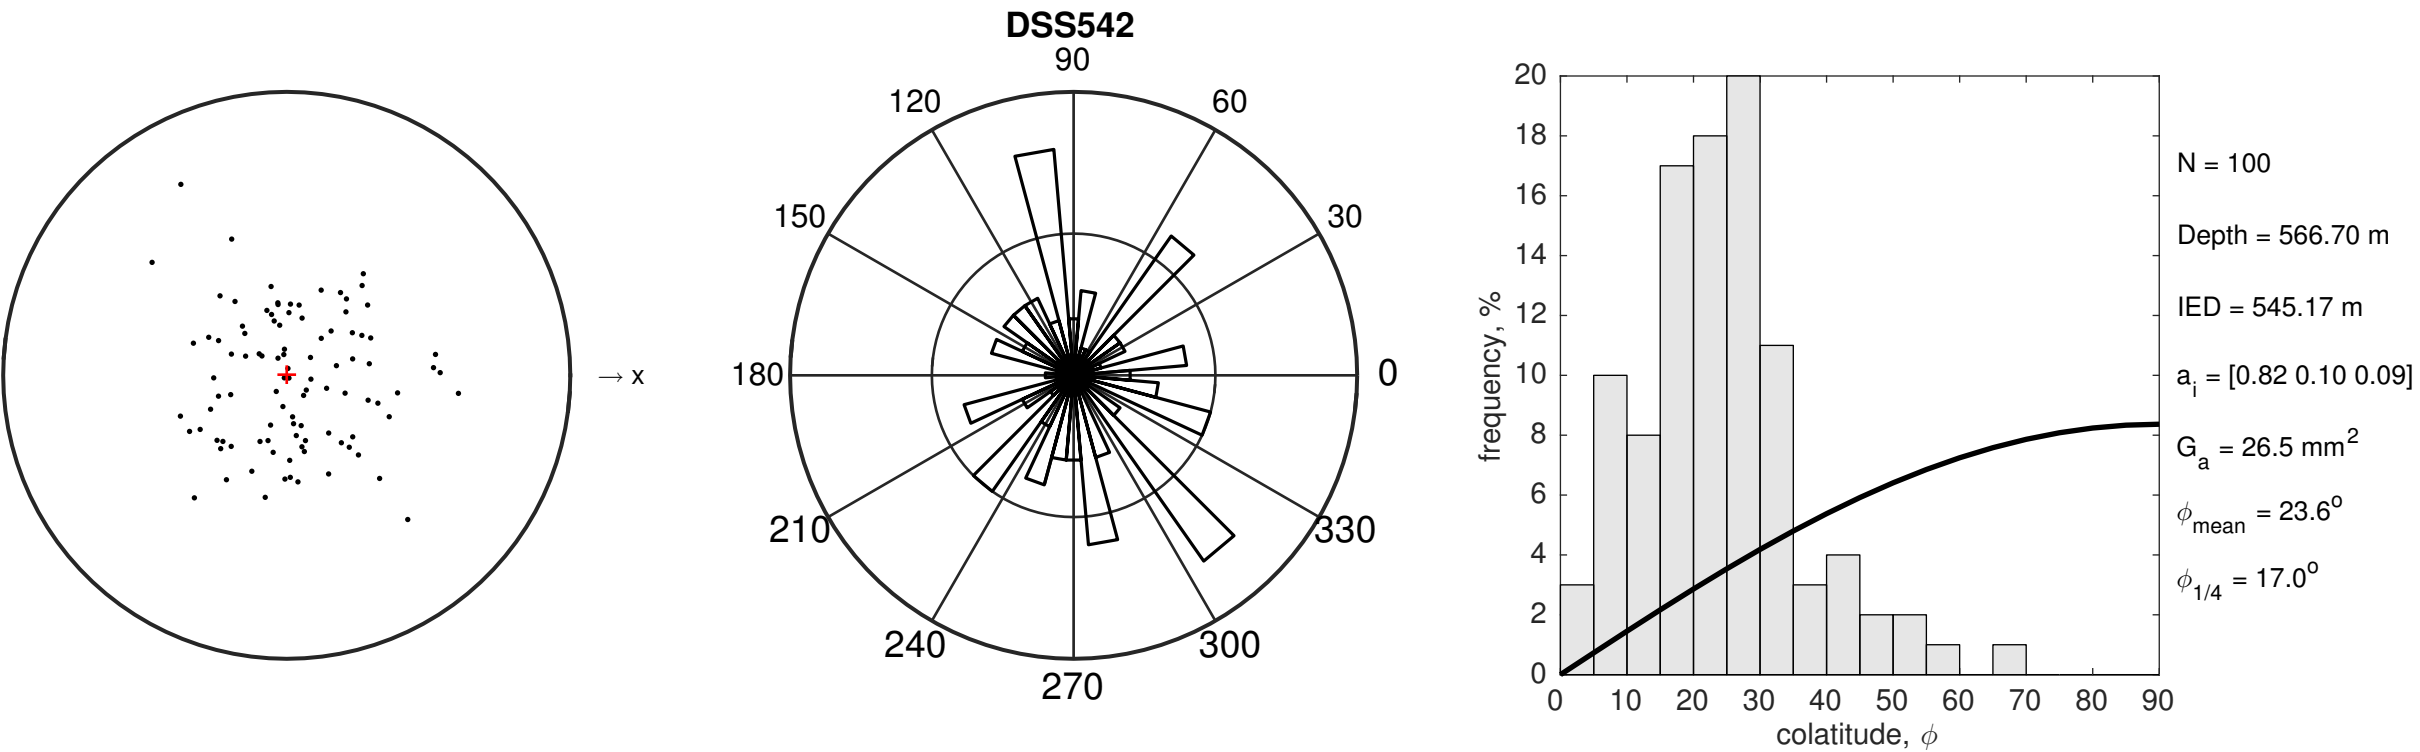

Supplement: Supplementary file 13 [file essd-2015-45-supplement.zip]

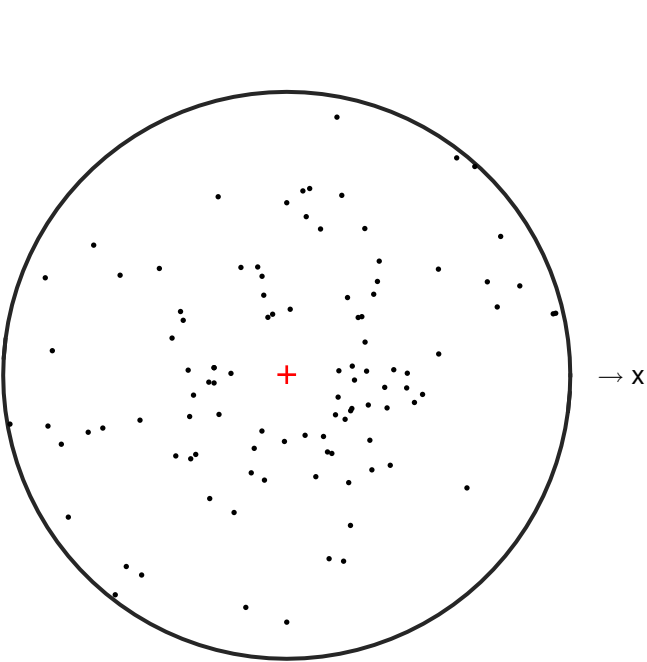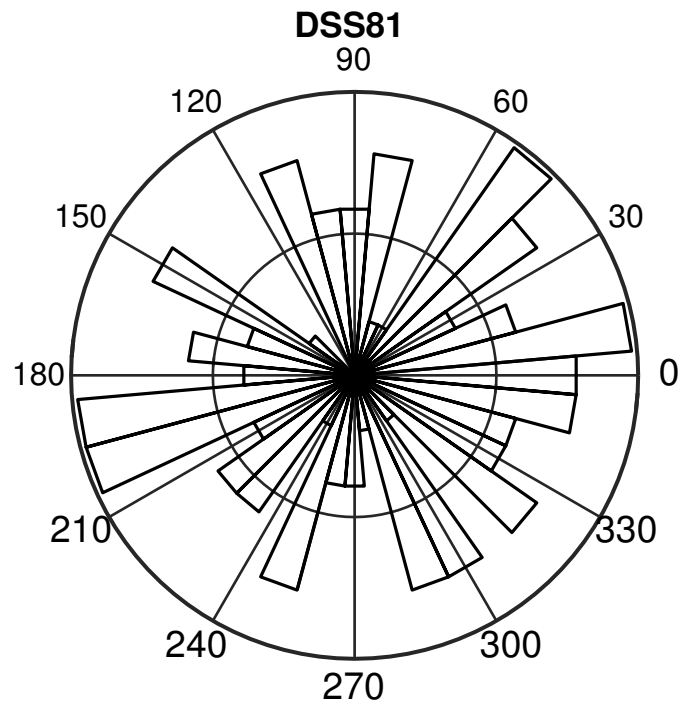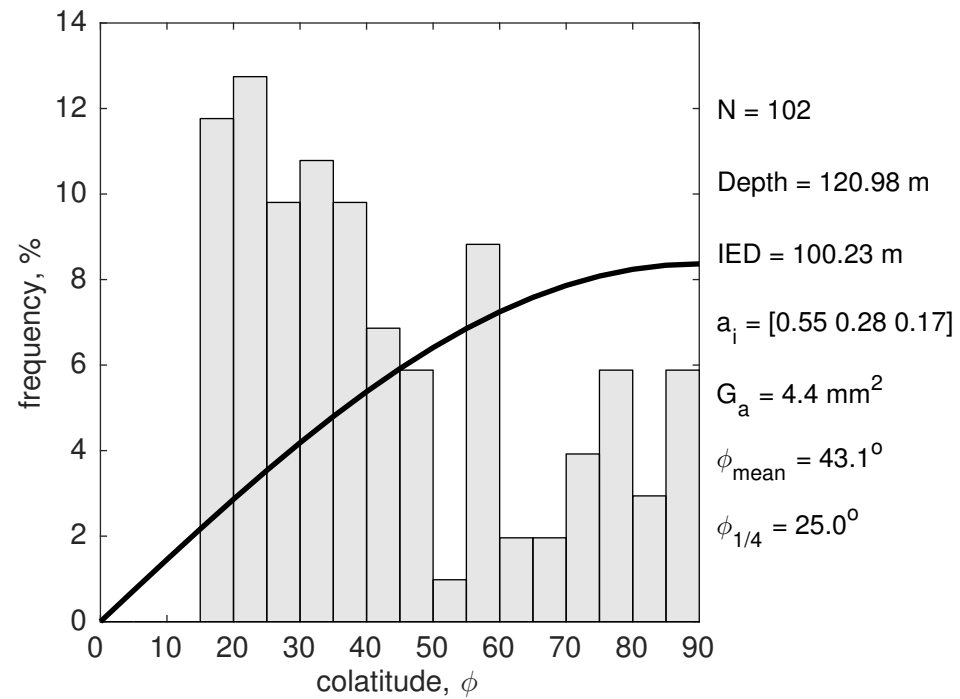

Supplement: Supplementary file 14 [file essd-2015-45-supplement.zip]

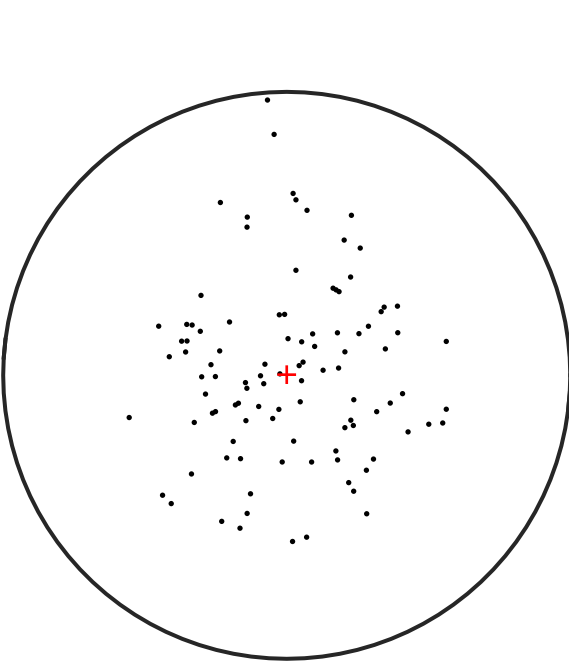

→ x

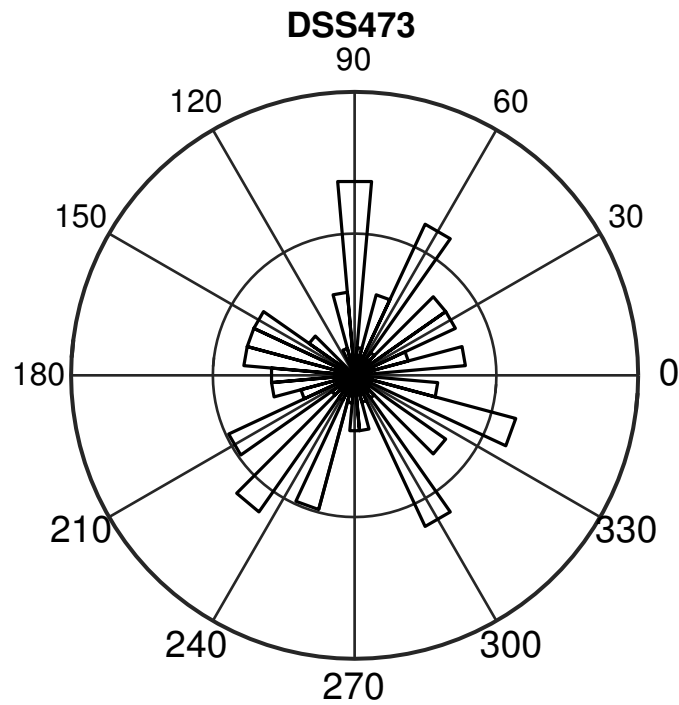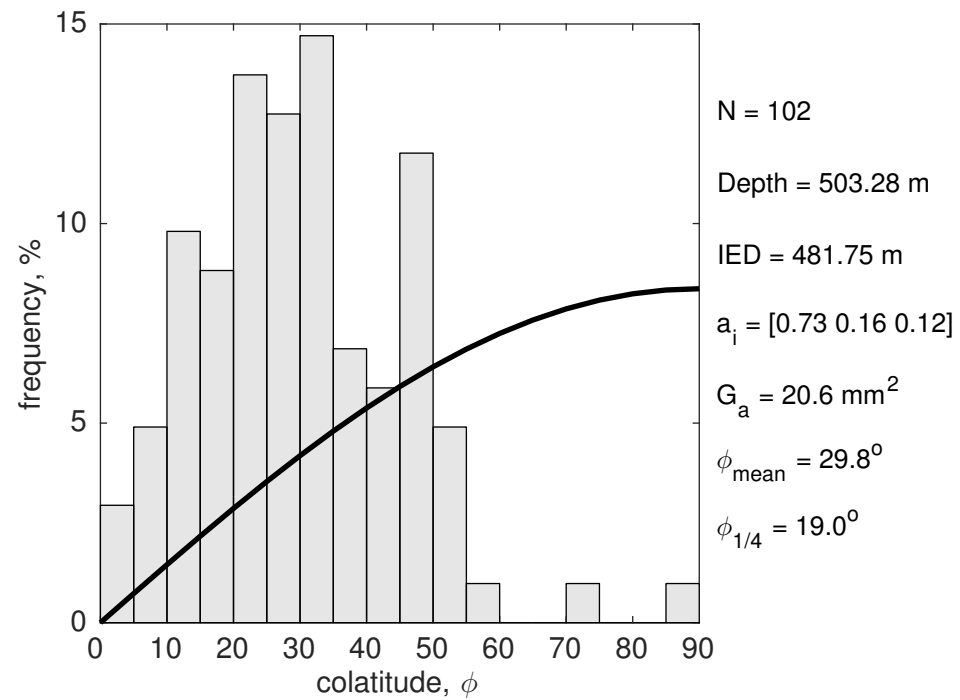

Supplement: Supplementary file 15 [file essd-2015-45-supplement.zip]

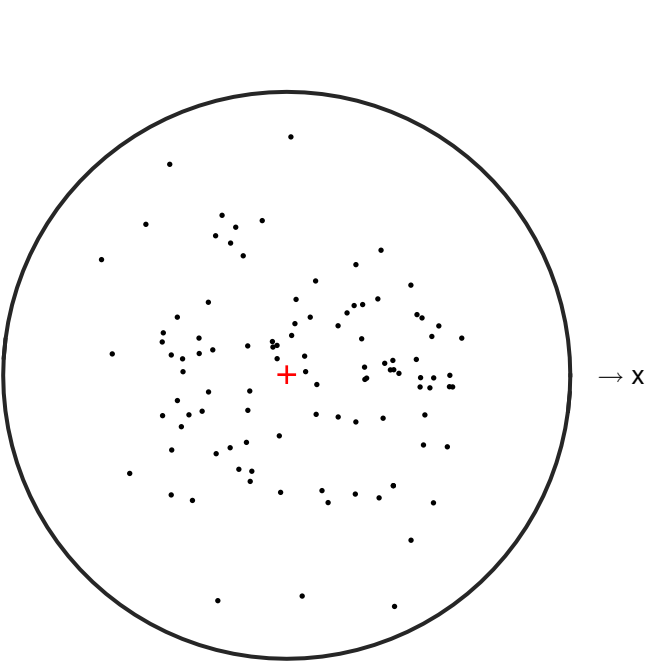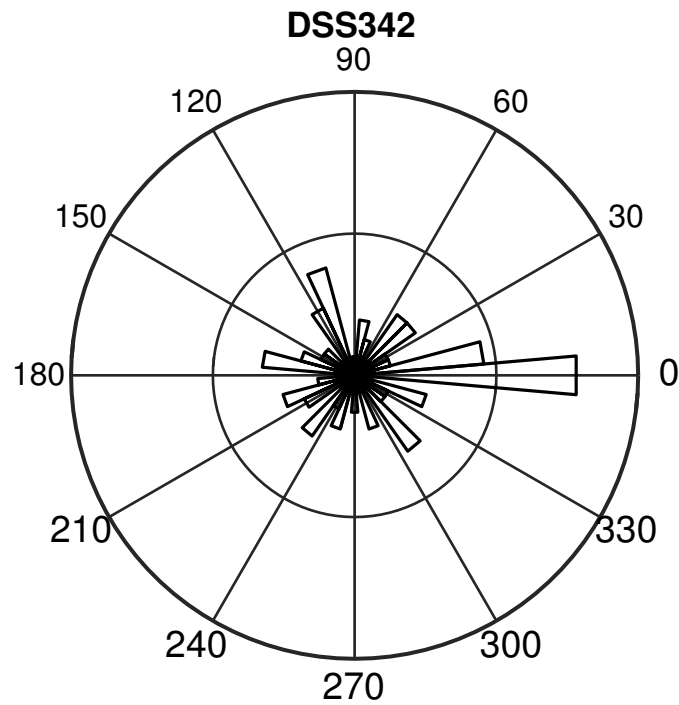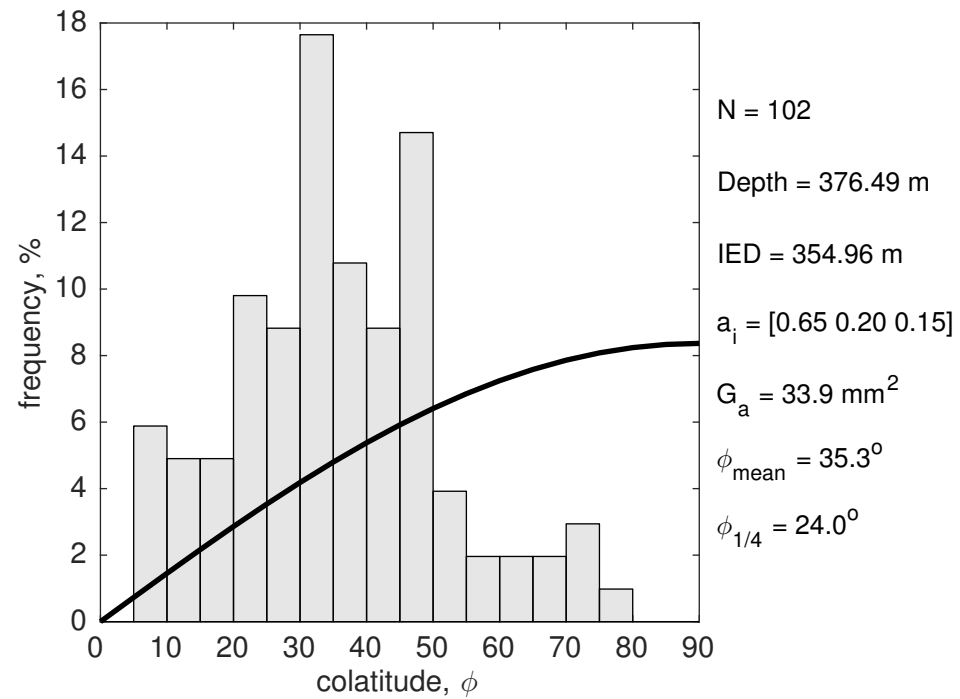

Supplement: Supplementary file 16 [file essd-2015-45-supplement.zip]

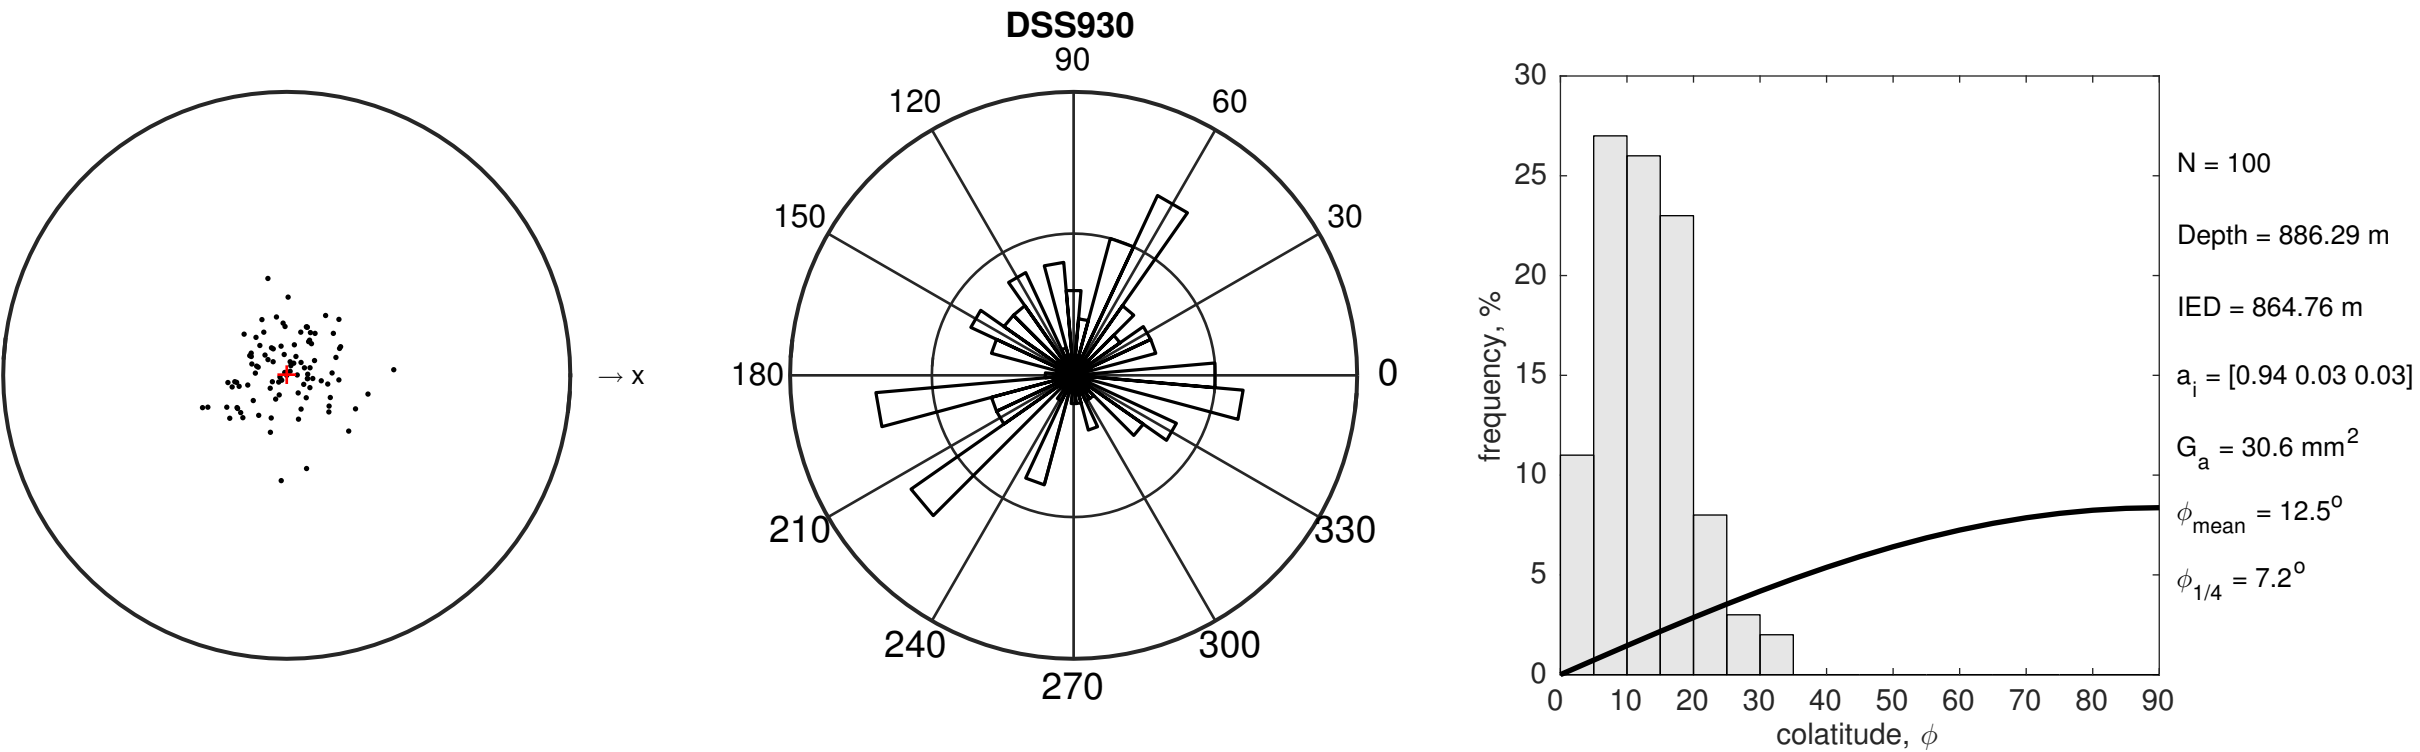

Supplement: Supplementary file 17 [file essd-2015-45-supplement.zip]

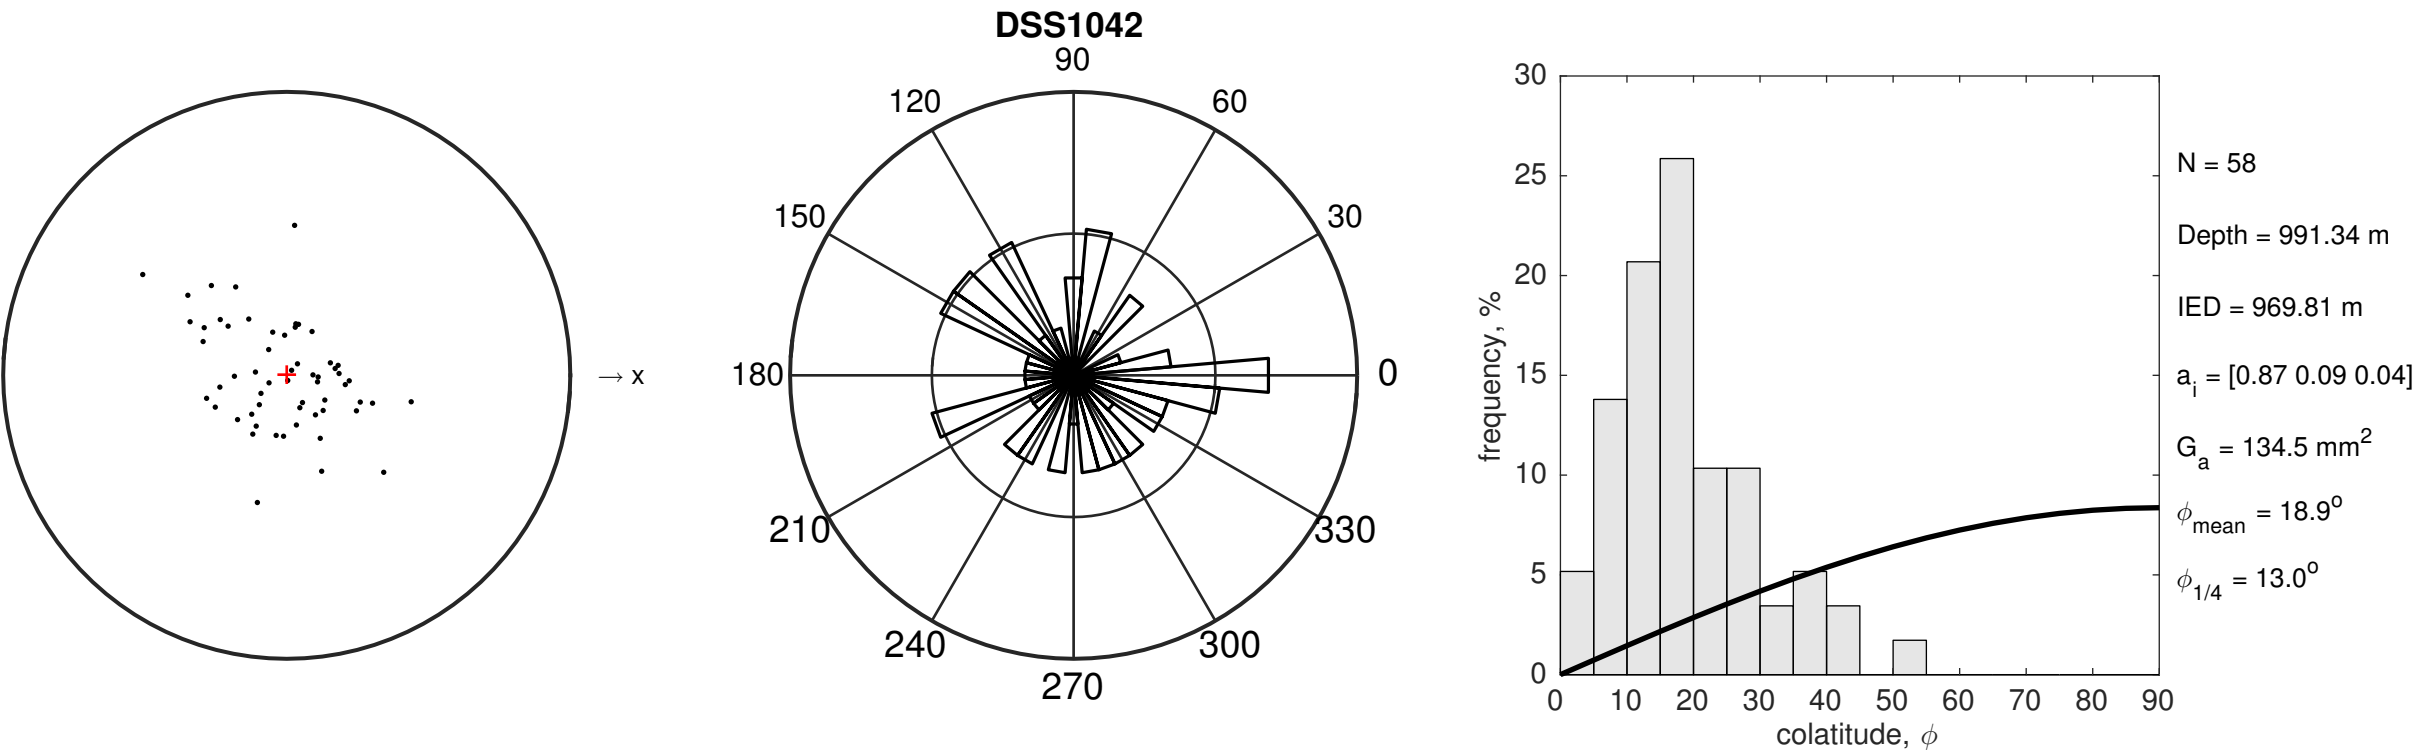

Supplement: Supplementary file 18 [file essd-2015-45-supplement.zip]

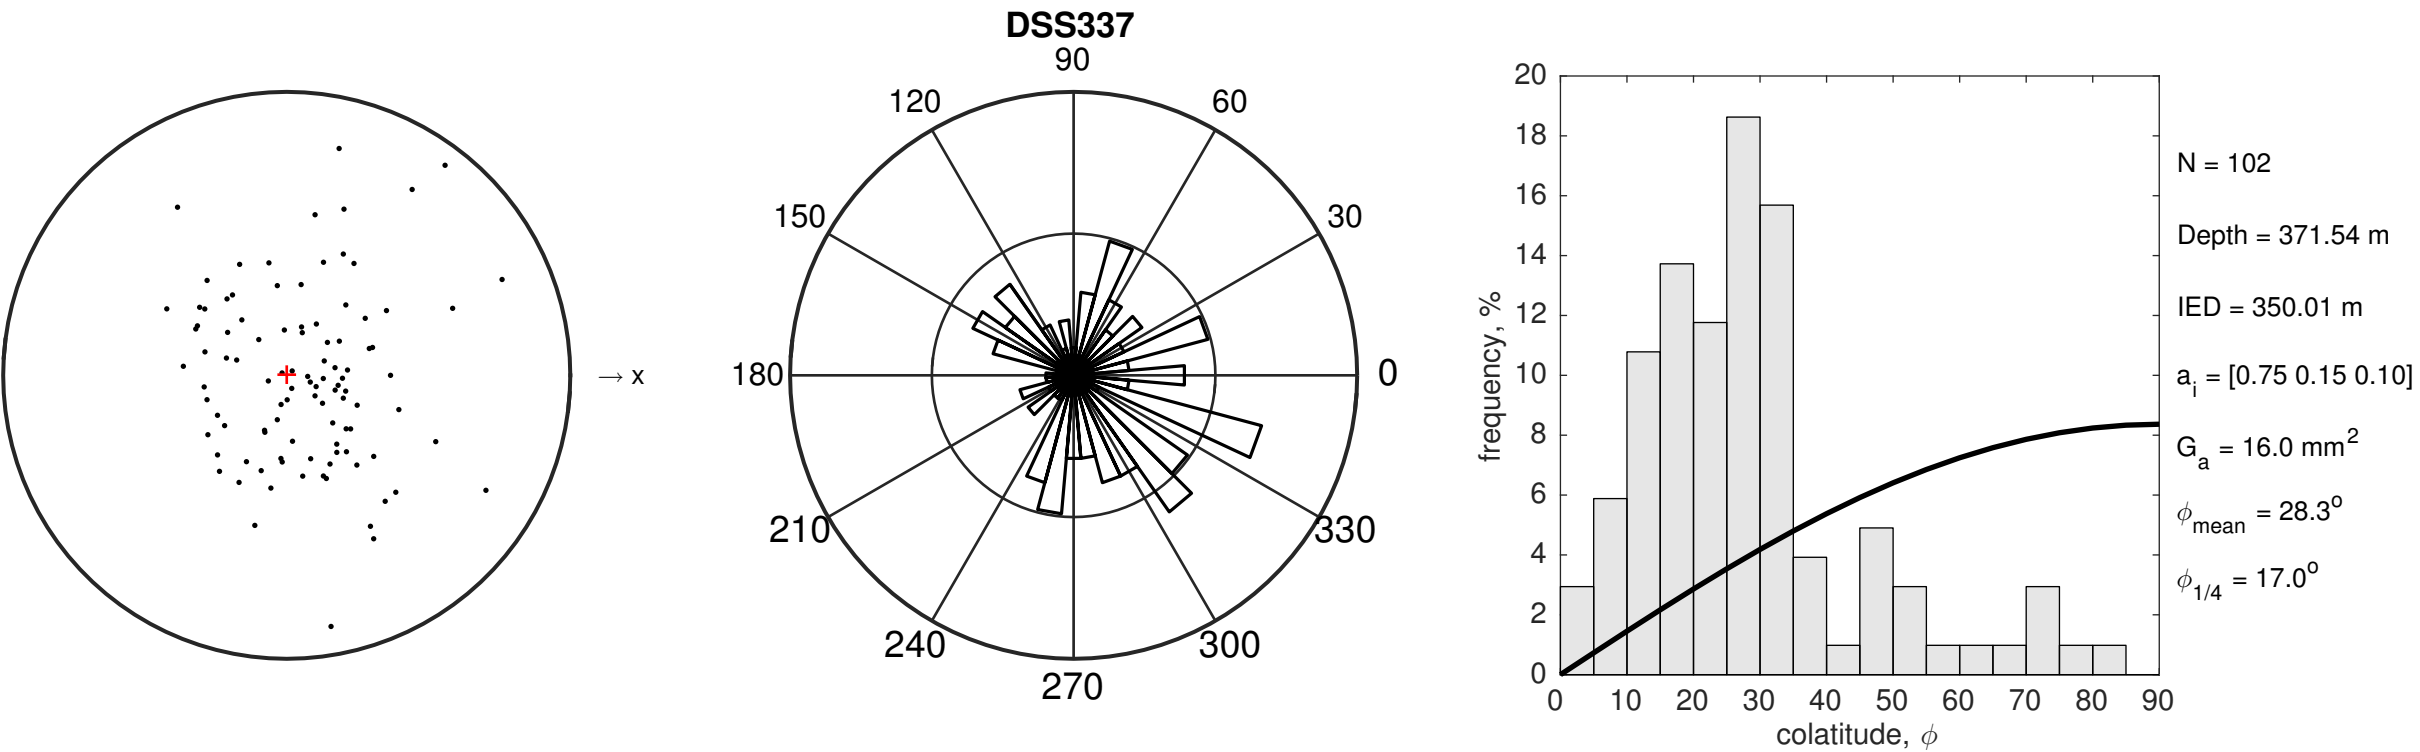

Supplement: Supplementary file 19 [file essd-2015-45-supplement.zip]

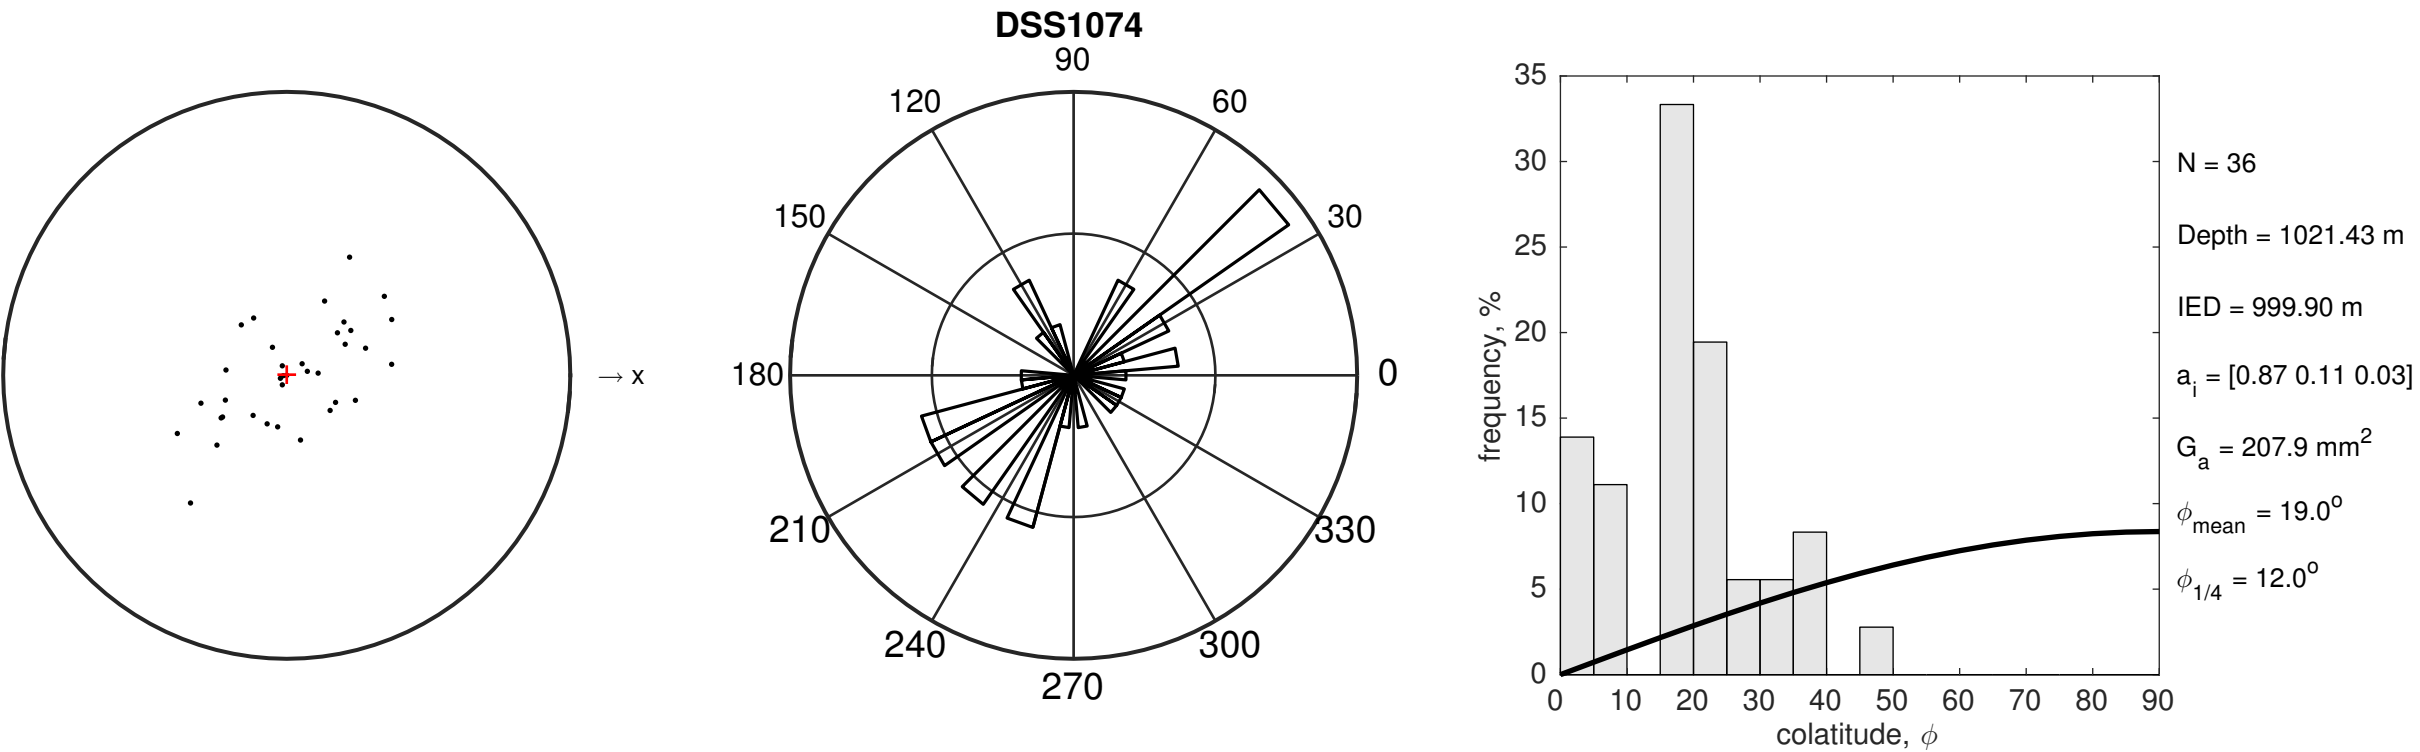

Supplement: Supplementary file 20 [file essd-2015-45-supplement.zip]

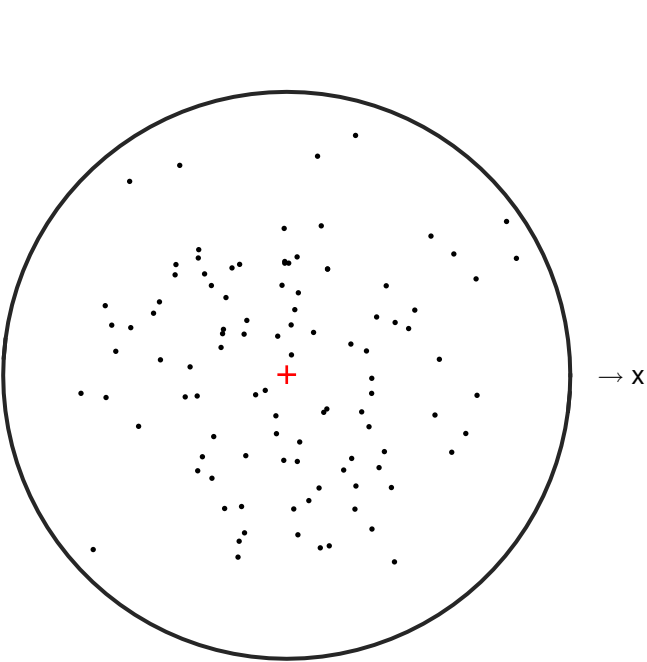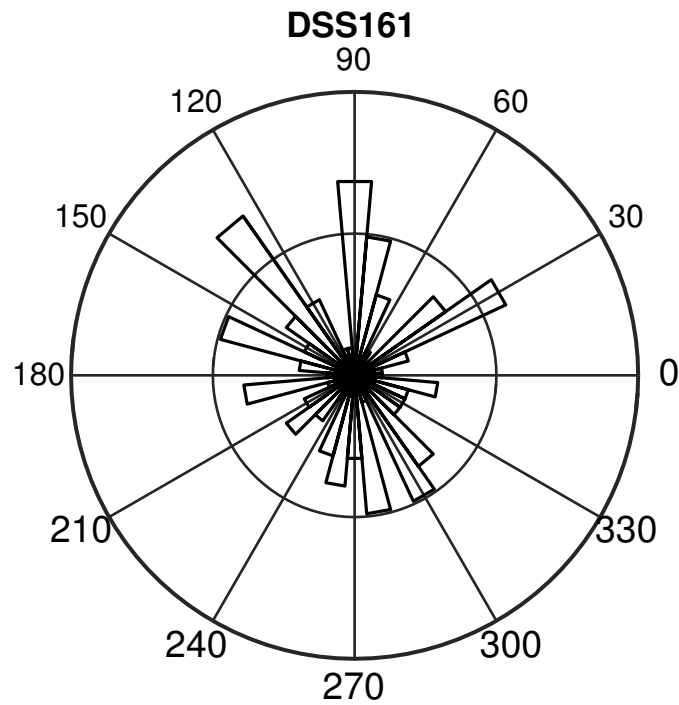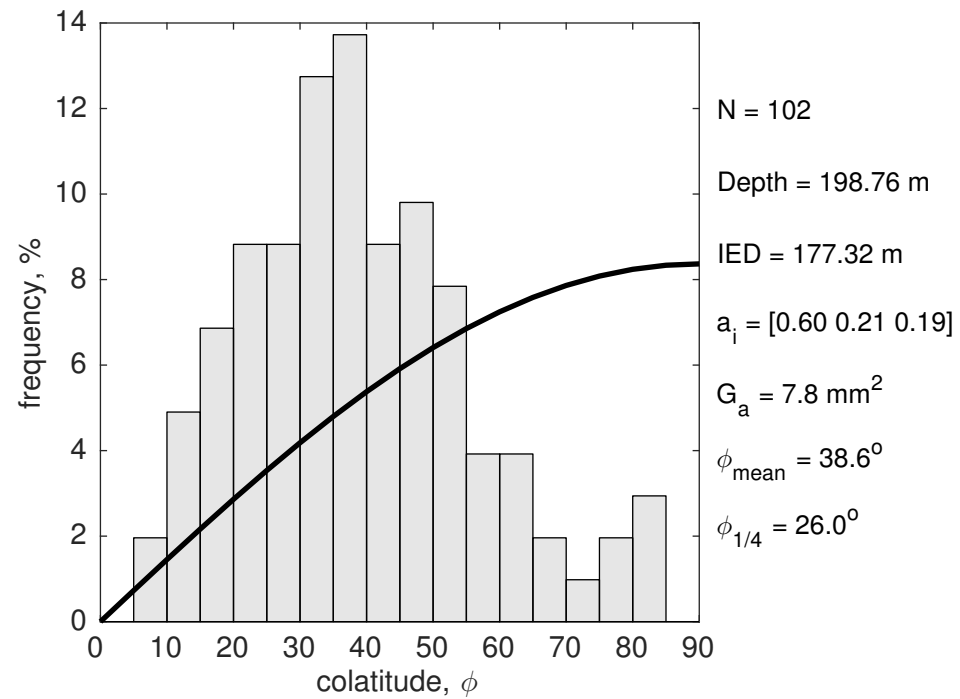

Supplement: Supplementary file 21 [file essd-2015-45-supplement.zip]

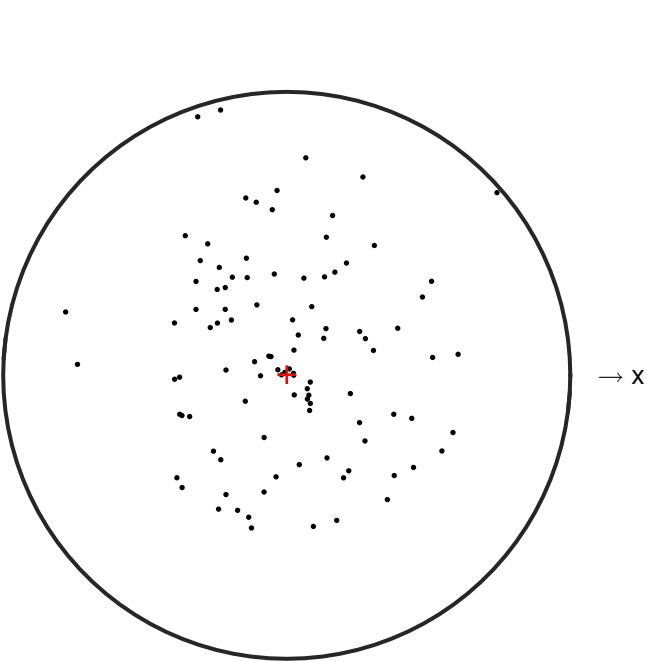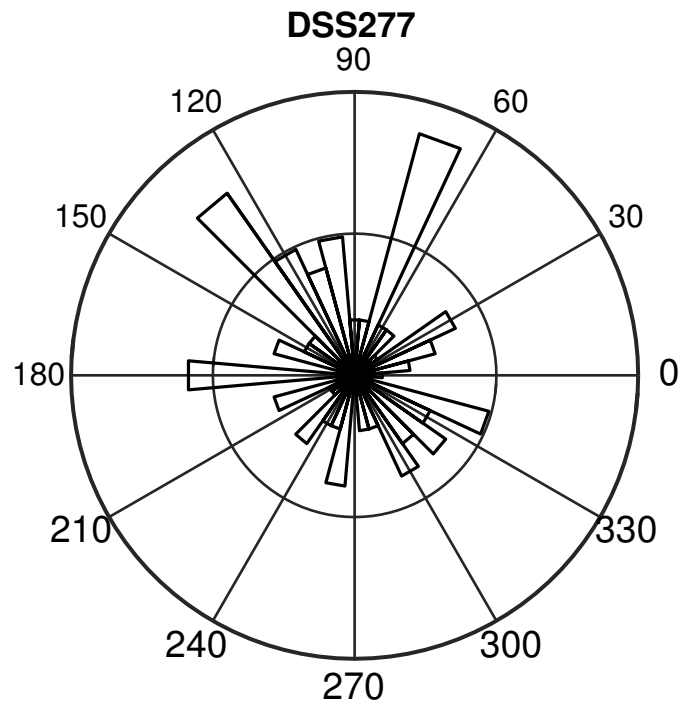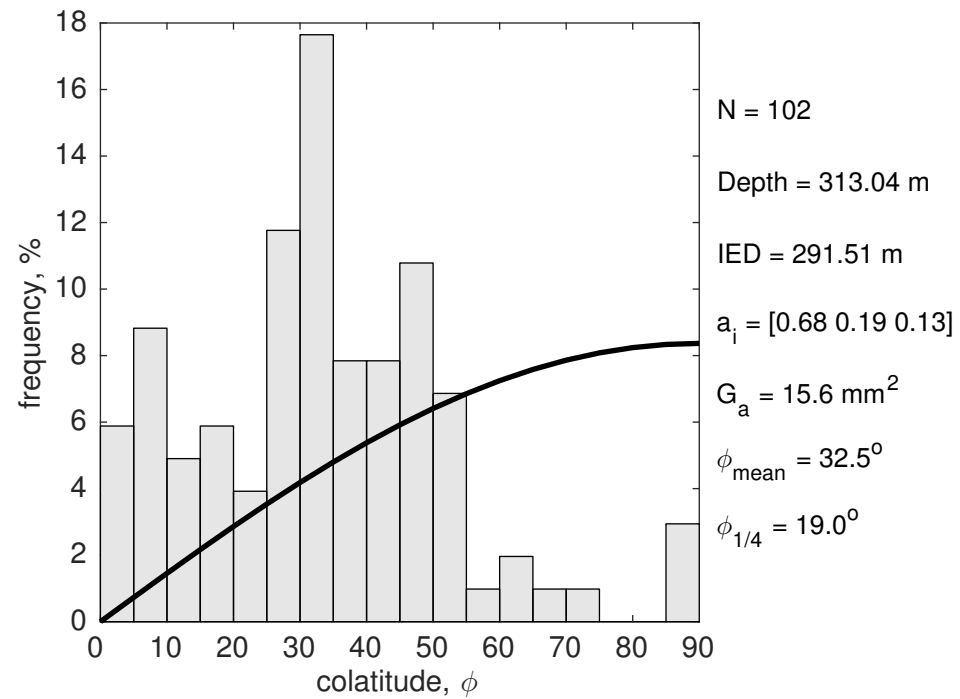

Supplement: Supplementary file 22 [file essd-2015-45-supplement.zip]

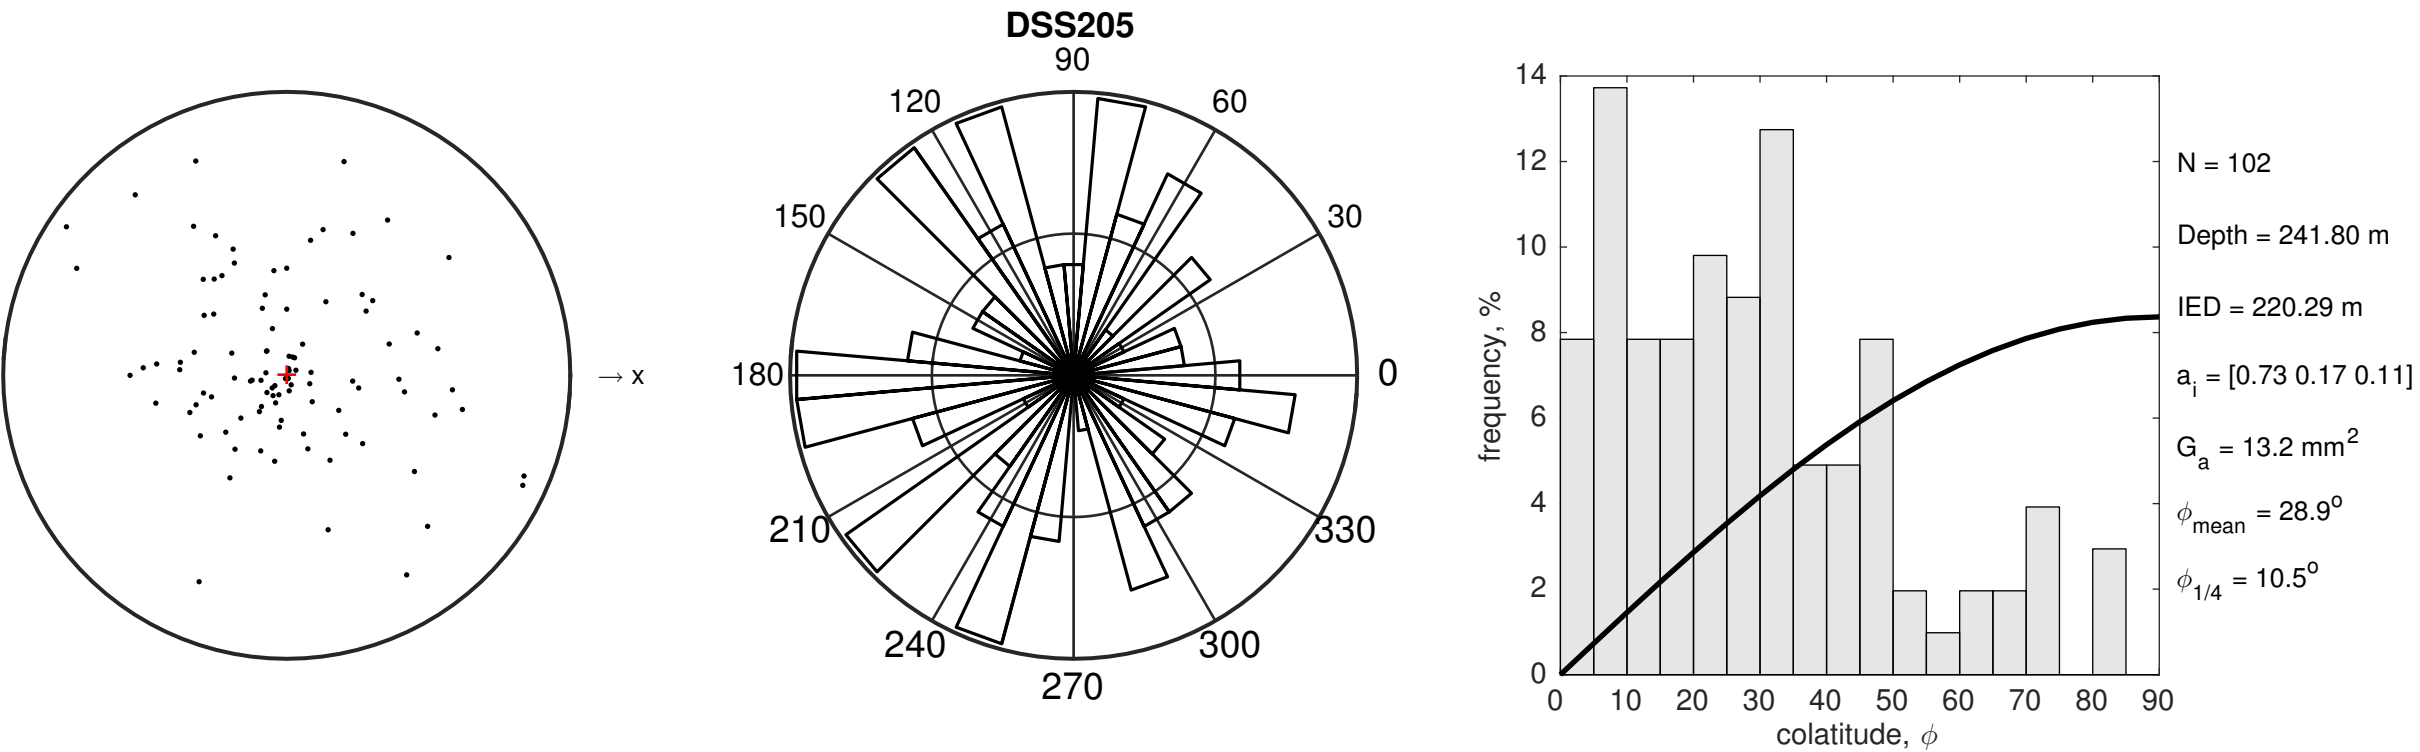

Supplement: Supplementary file 23 [file essd-2015-45-supplement.zip]

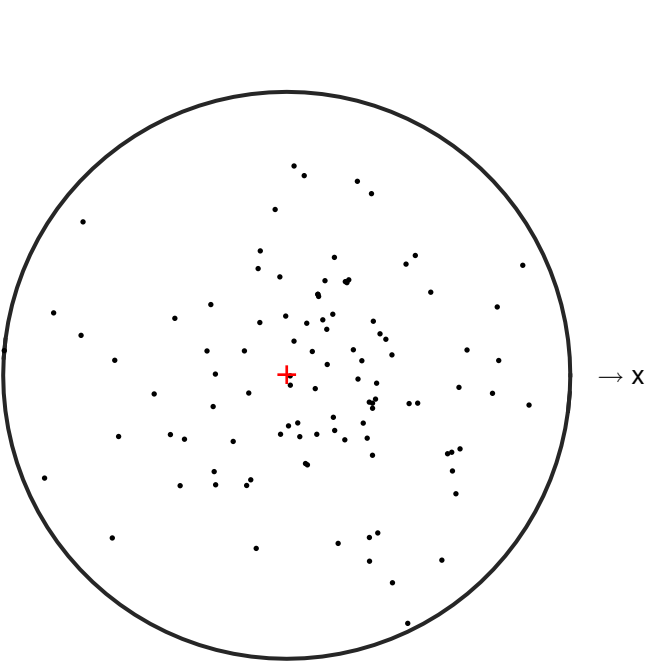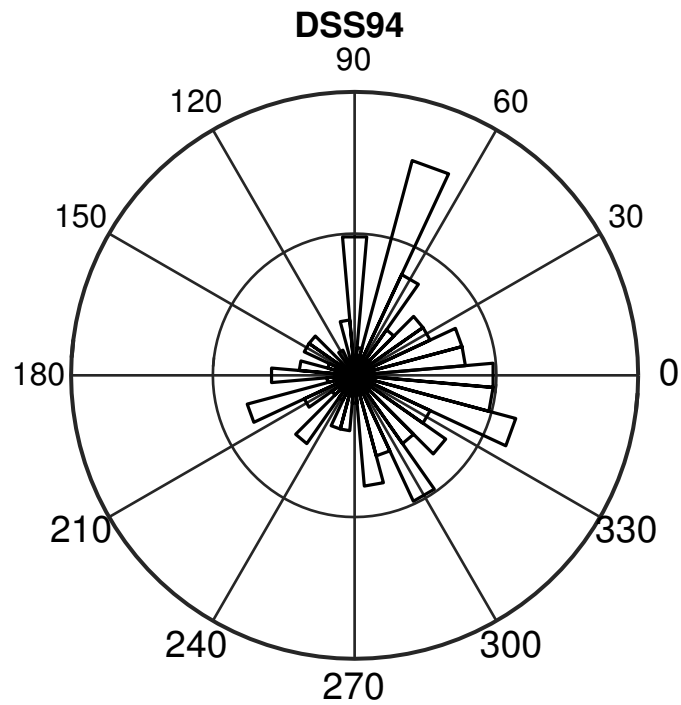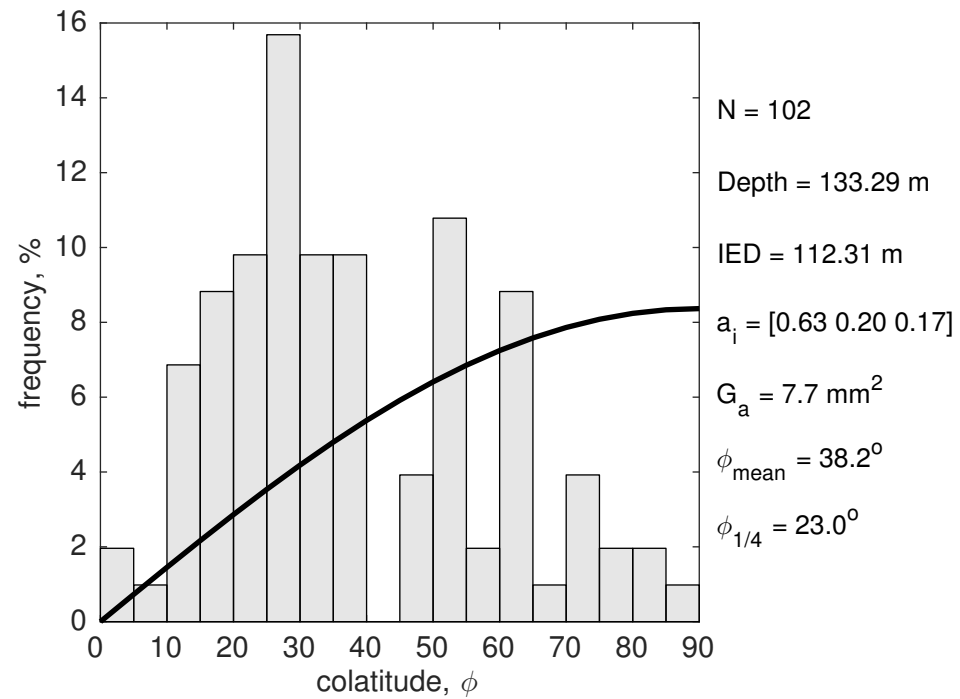

Supplement: Supplementary file 24 [file essd-2015-45-supplement.zip]

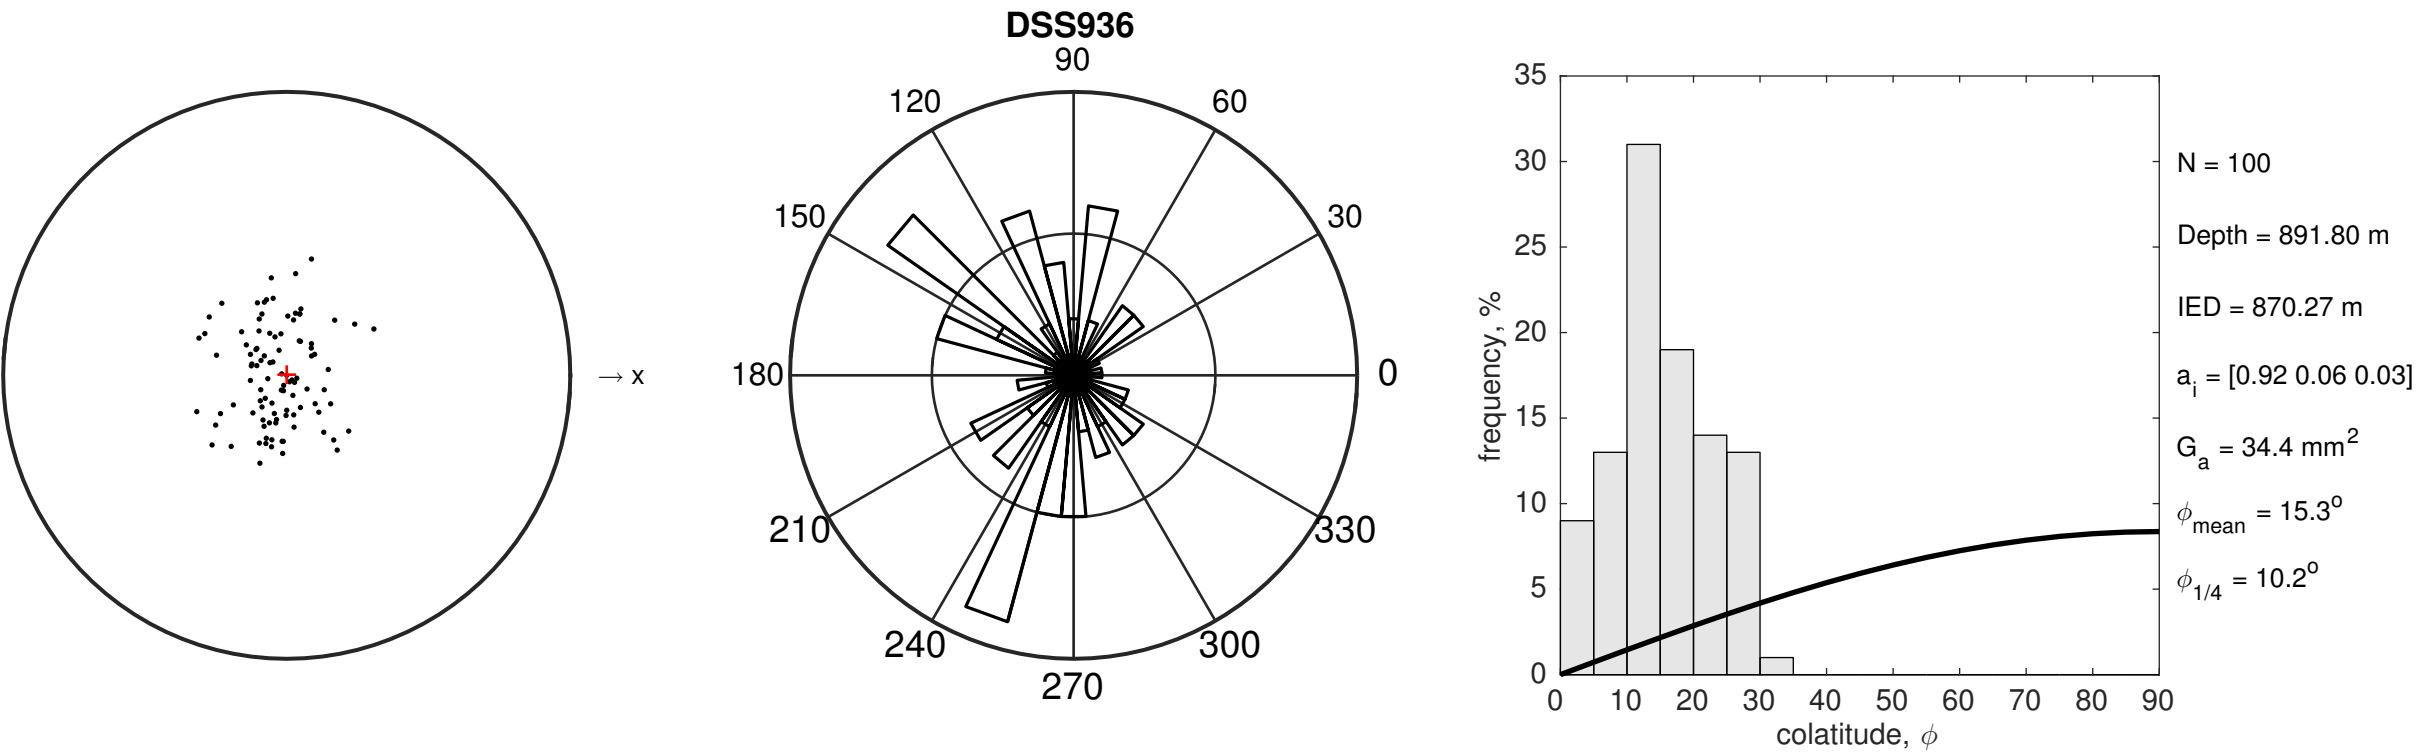

Supplement: Supplementary file 25 [file essd-2015-45-supplement.zip]

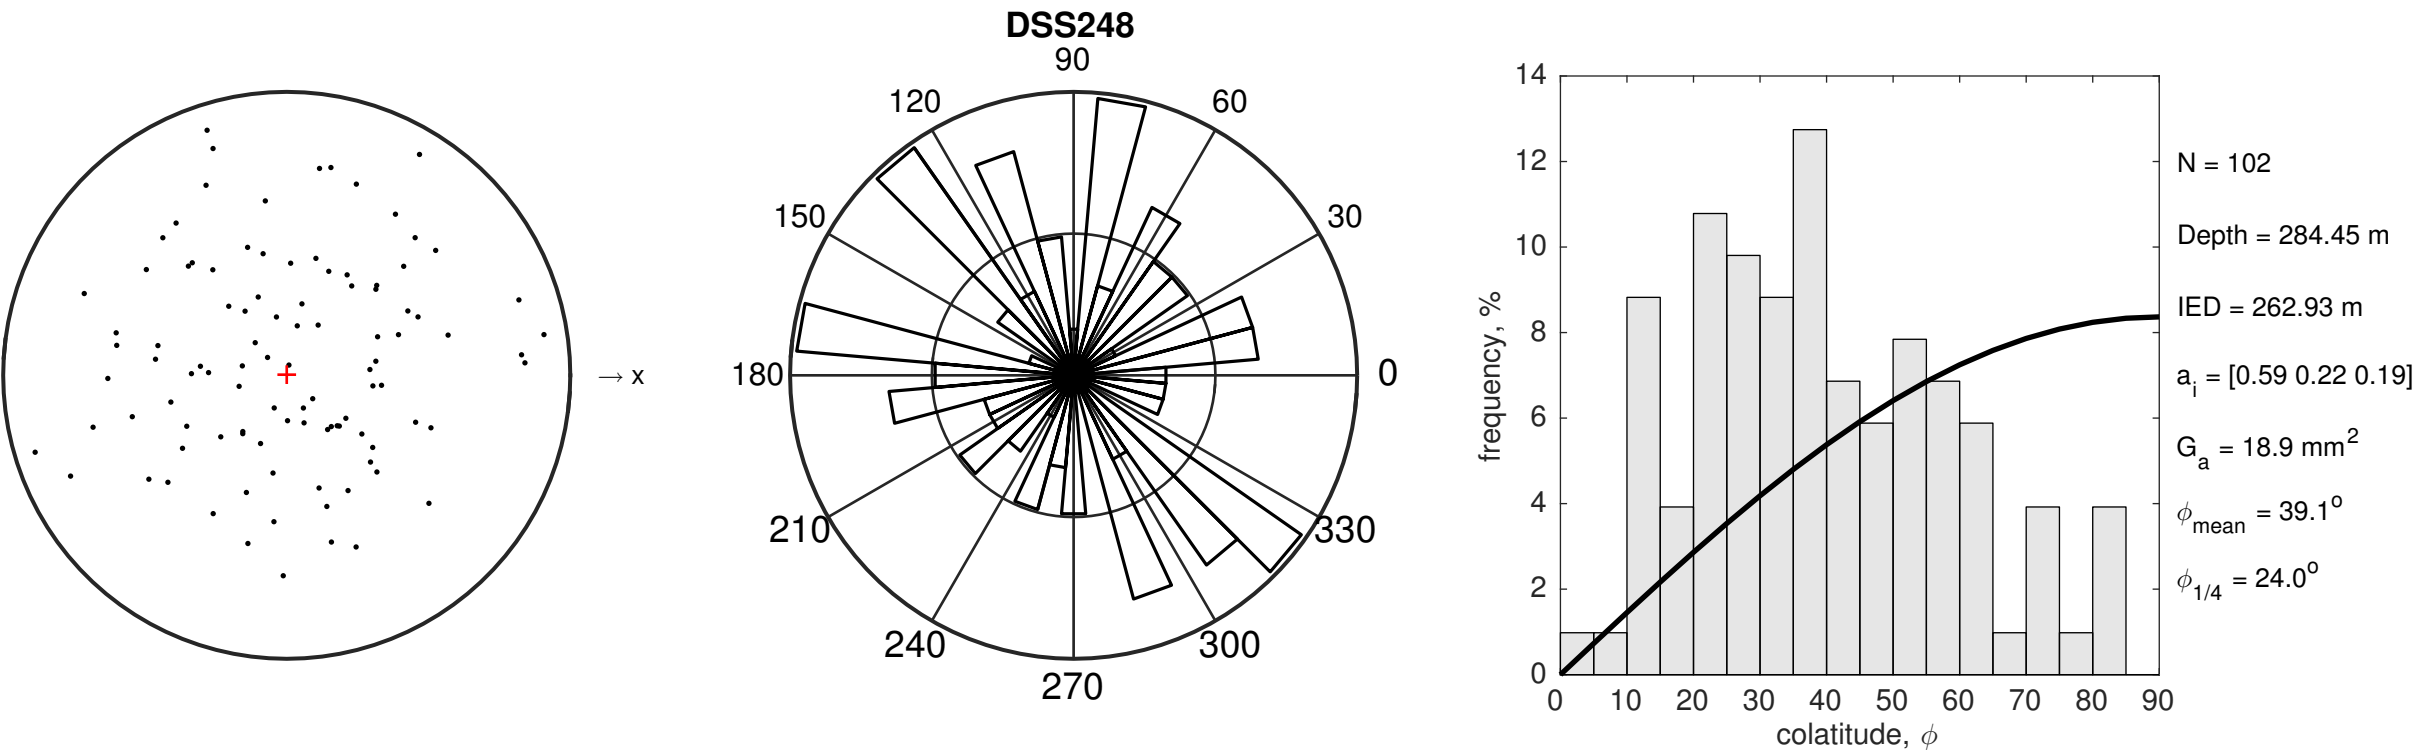

Supplement: Supplementary file 26 [file essd-2015-45-supplement.zip]

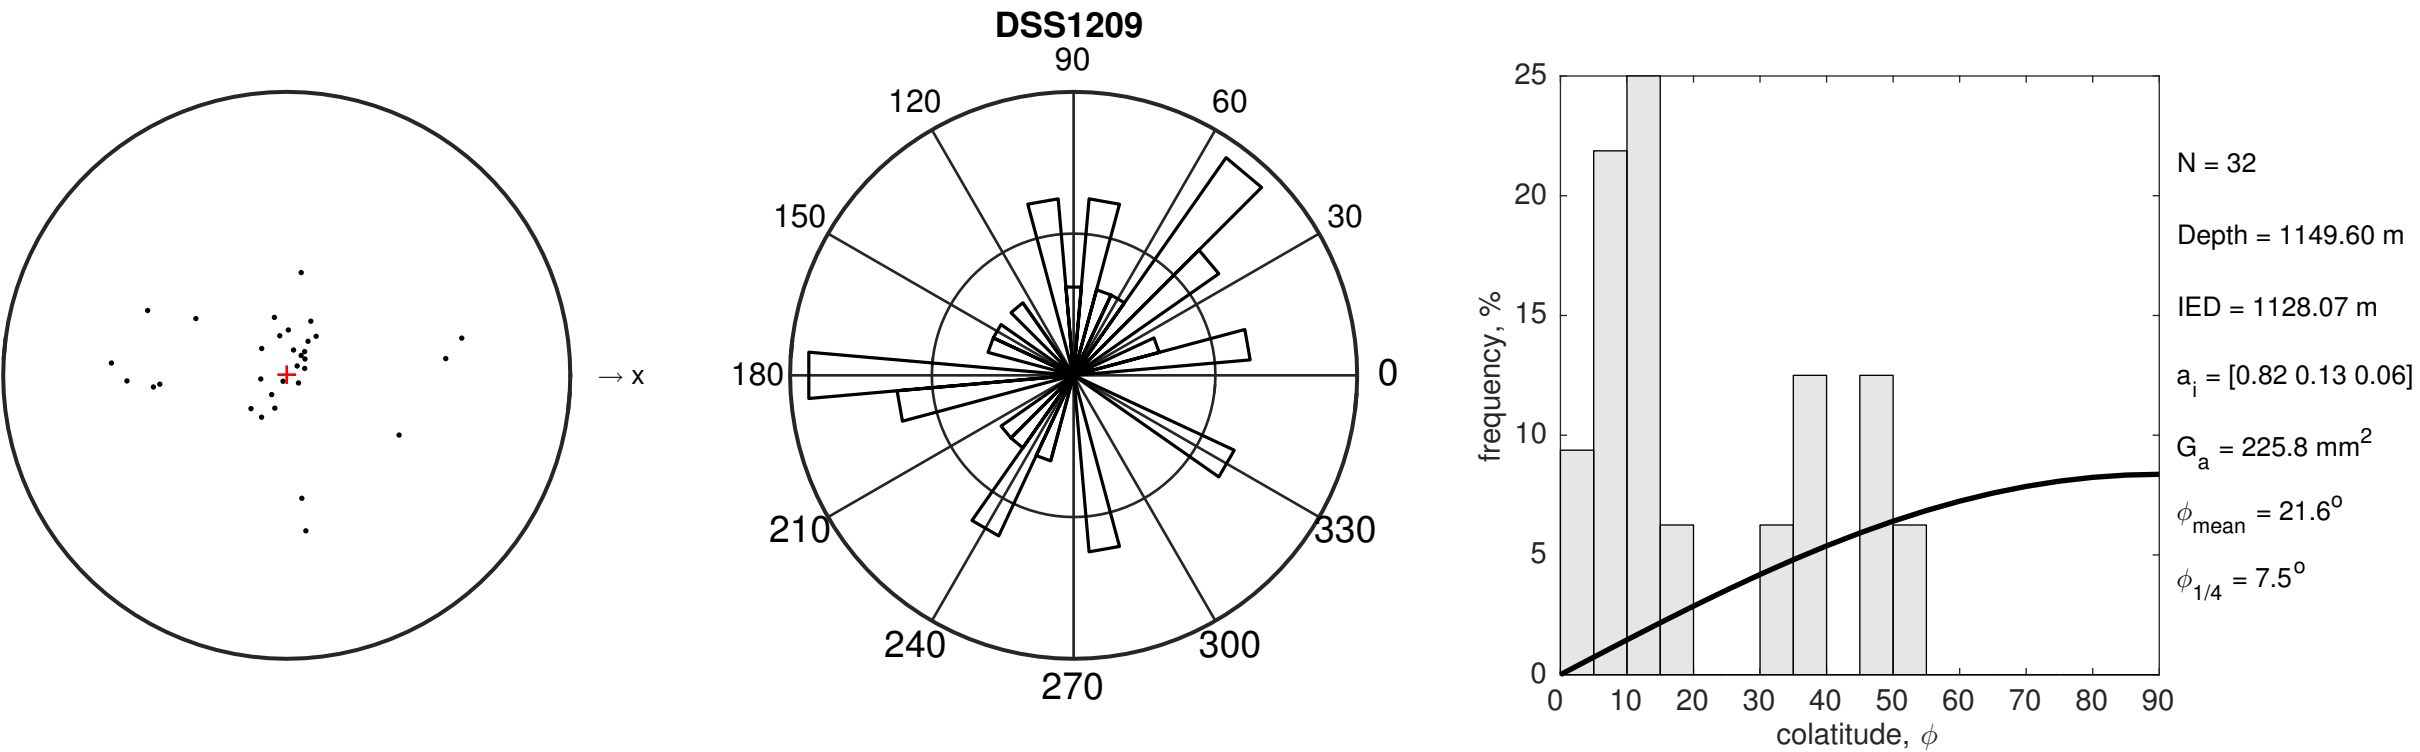

Supplement: Supplementary file 27 [file essd-2015-45-supplement.zip]

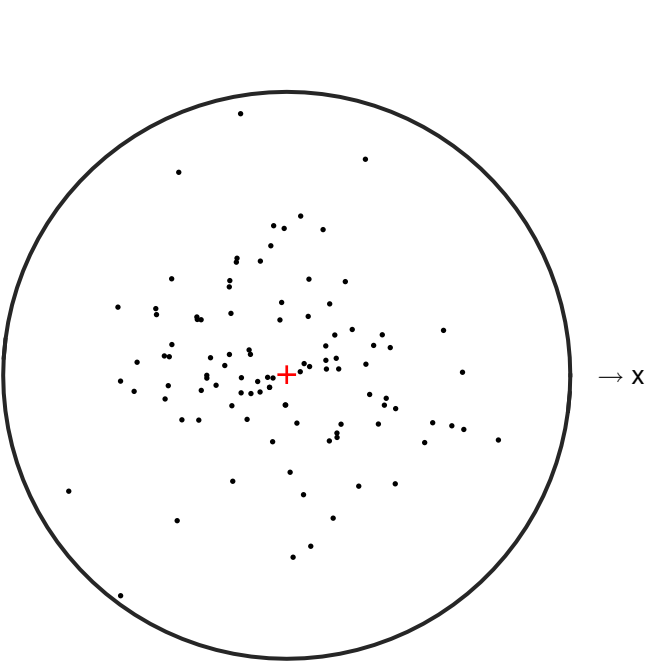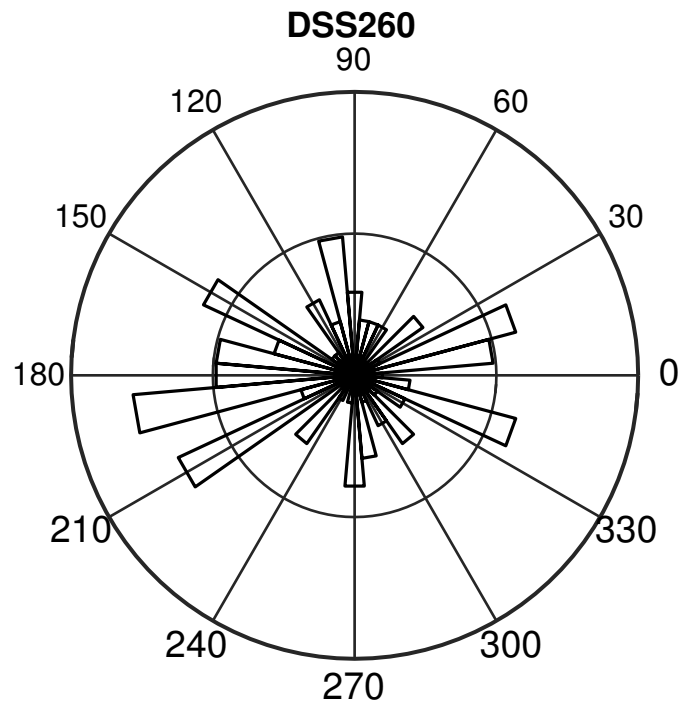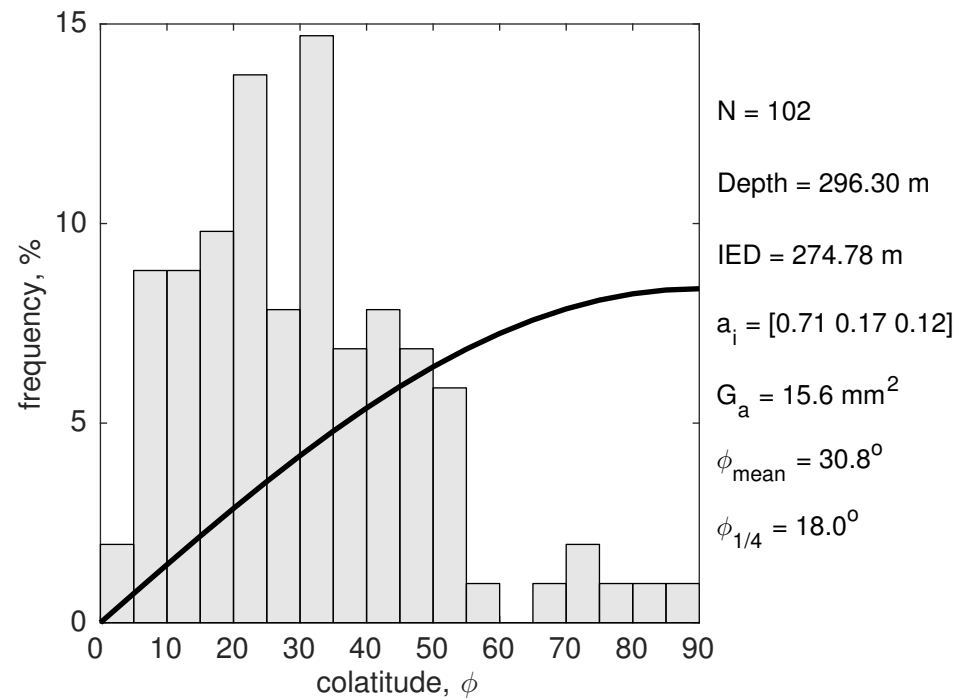

Supplement: Supplementary file 28 [file essd-2015-45-supplement.zip]

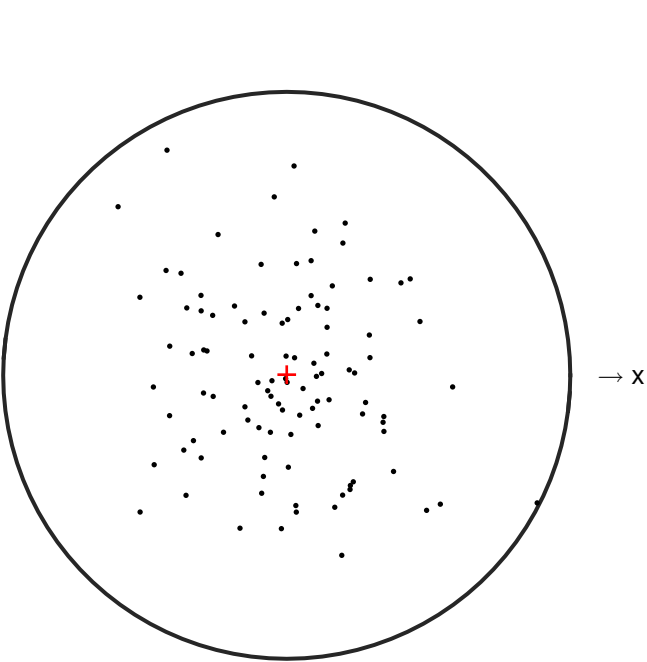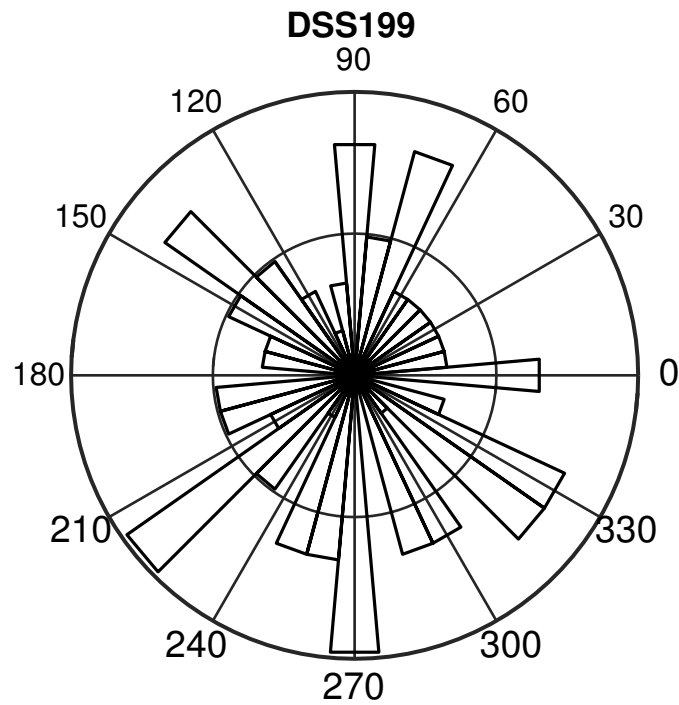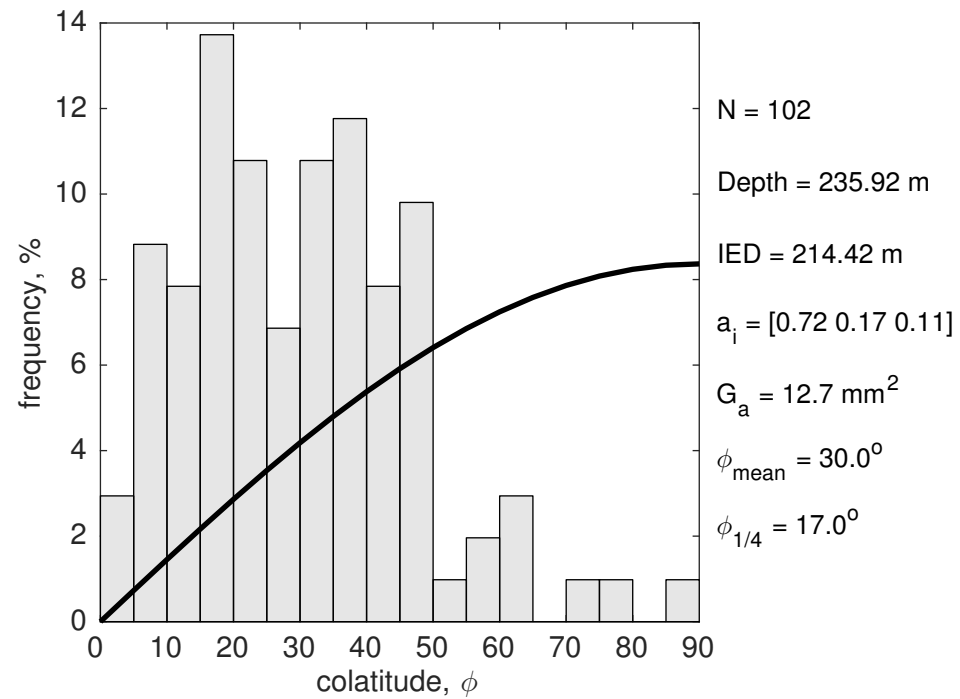

Supplement: Supplementary file 29 [file essd-2015-45-supplement.zip]

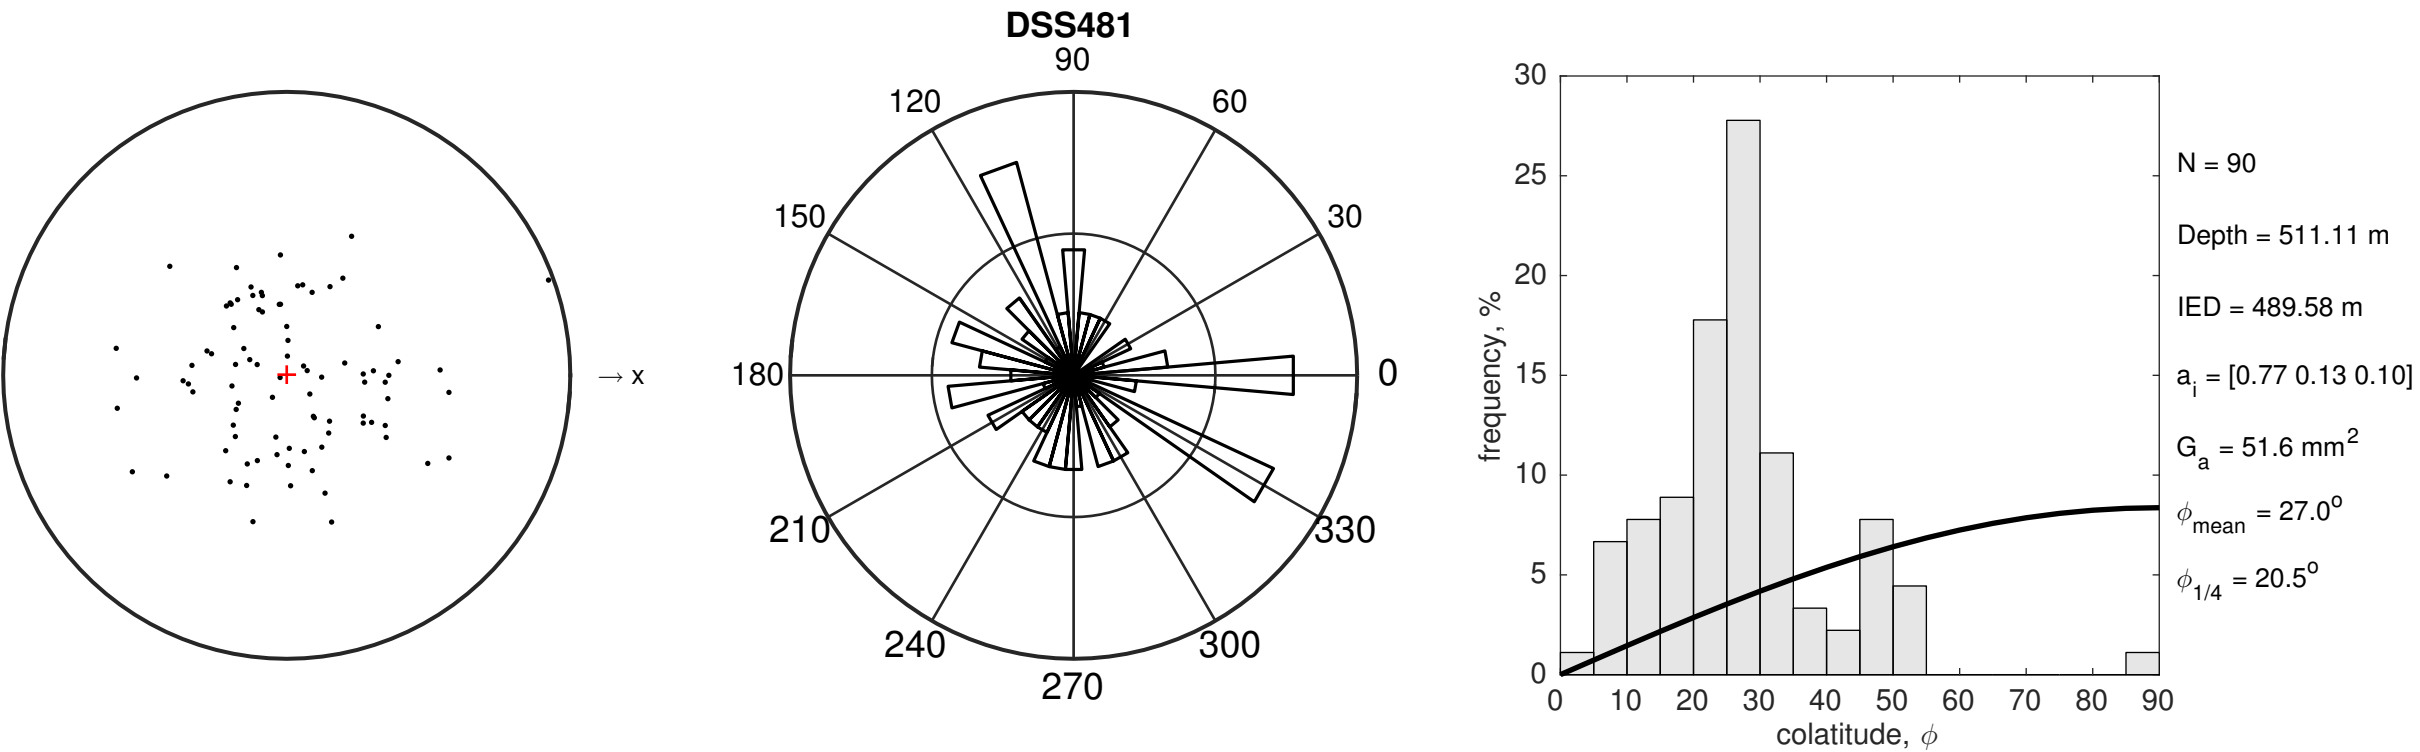

Supplement: Supplementary file 30 [file essd-2015-45-supplement.zip]

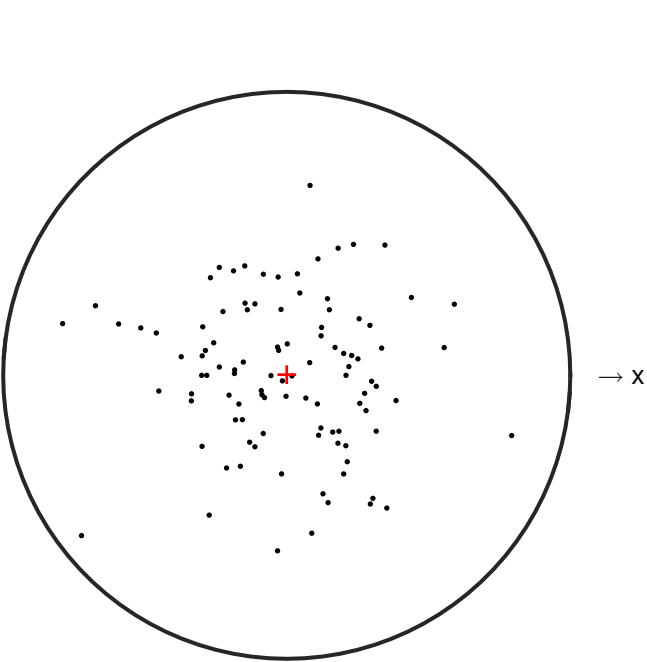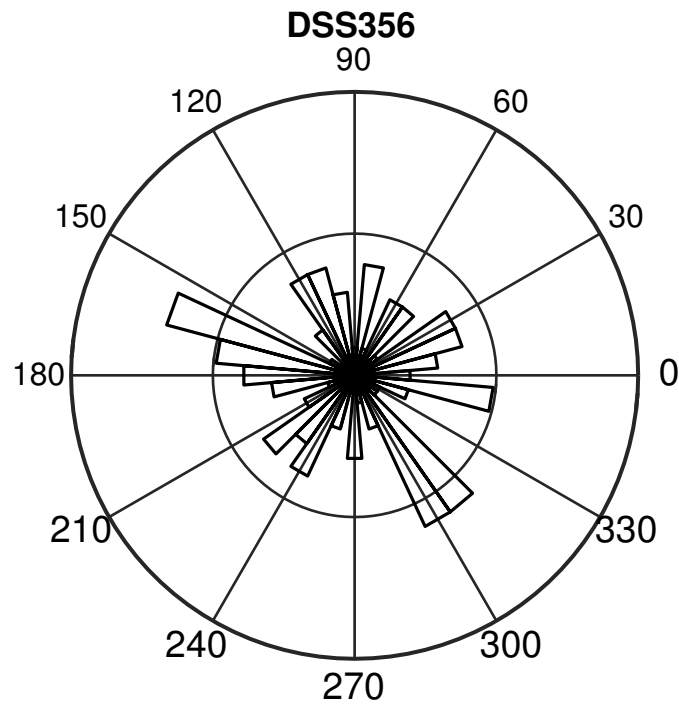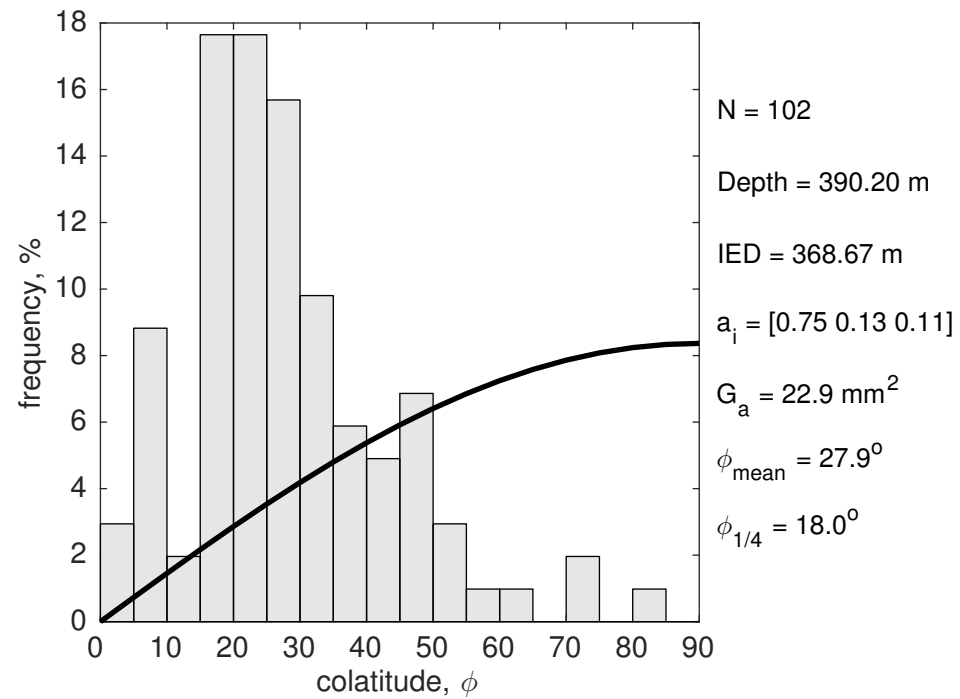

Supplement: Supplementary file 31 [file essd-2015-45-supplement.zip]

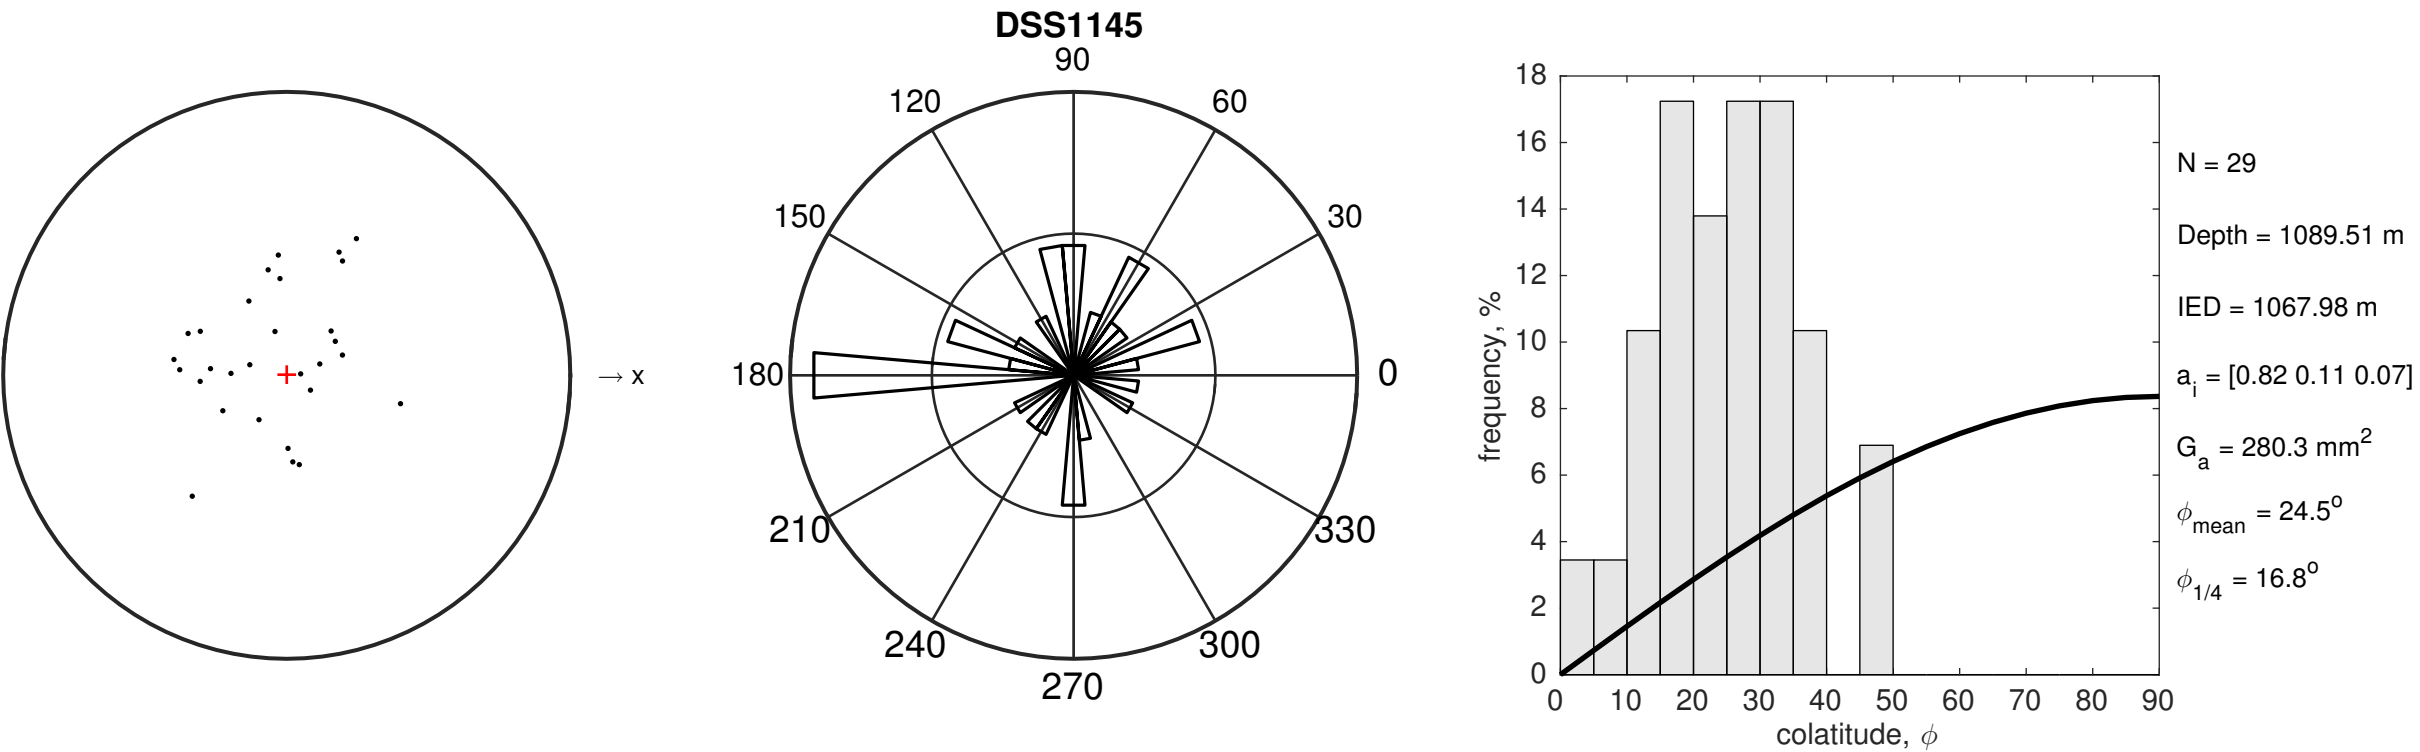

Supplement: Supplementary file 32 [file essd-2015-45-supplement.zip]

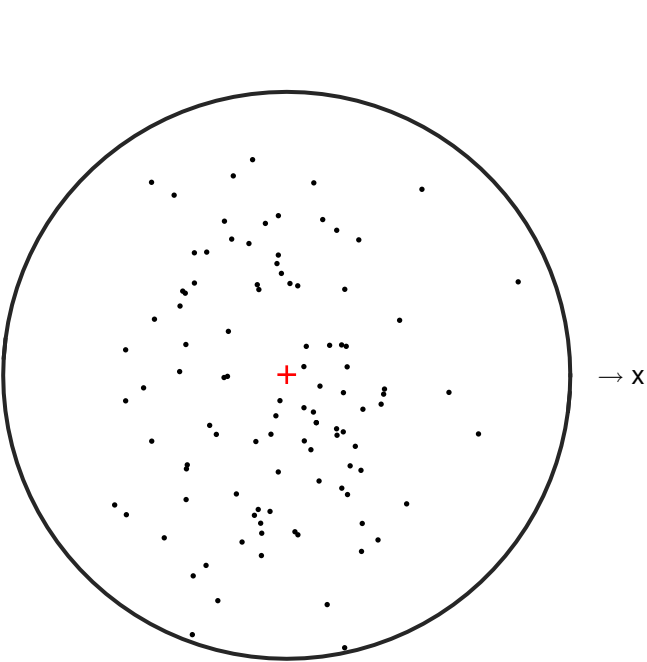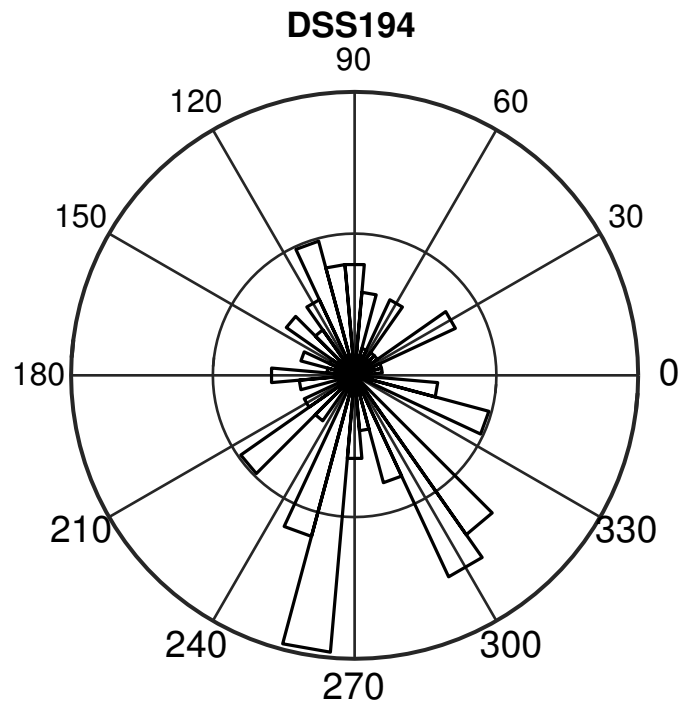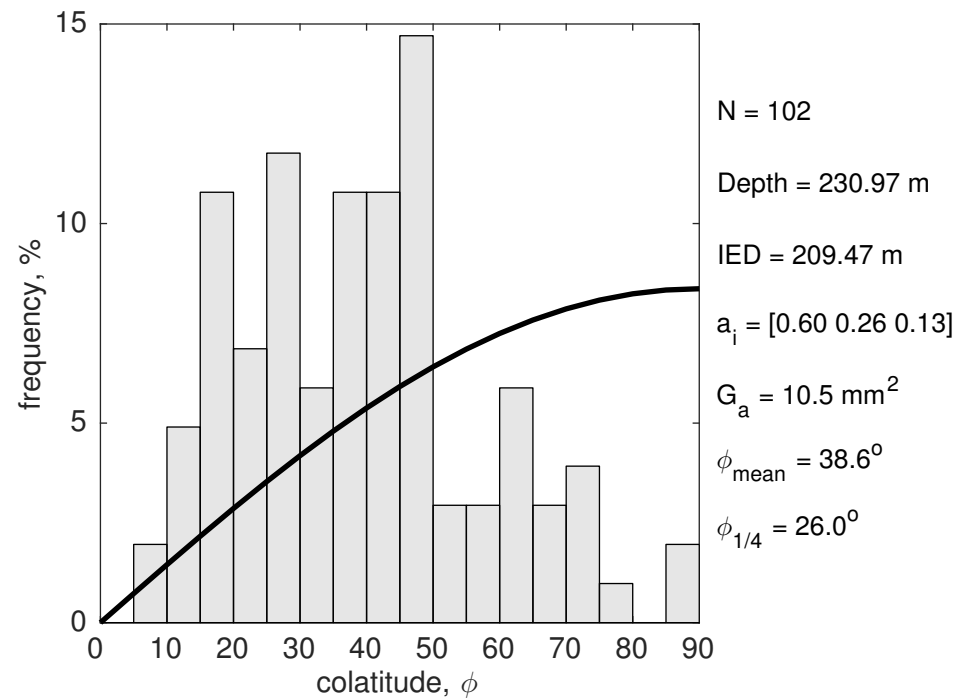

Supplement: Supplementary file 33 [file essd-2015-45-supplement.zip]

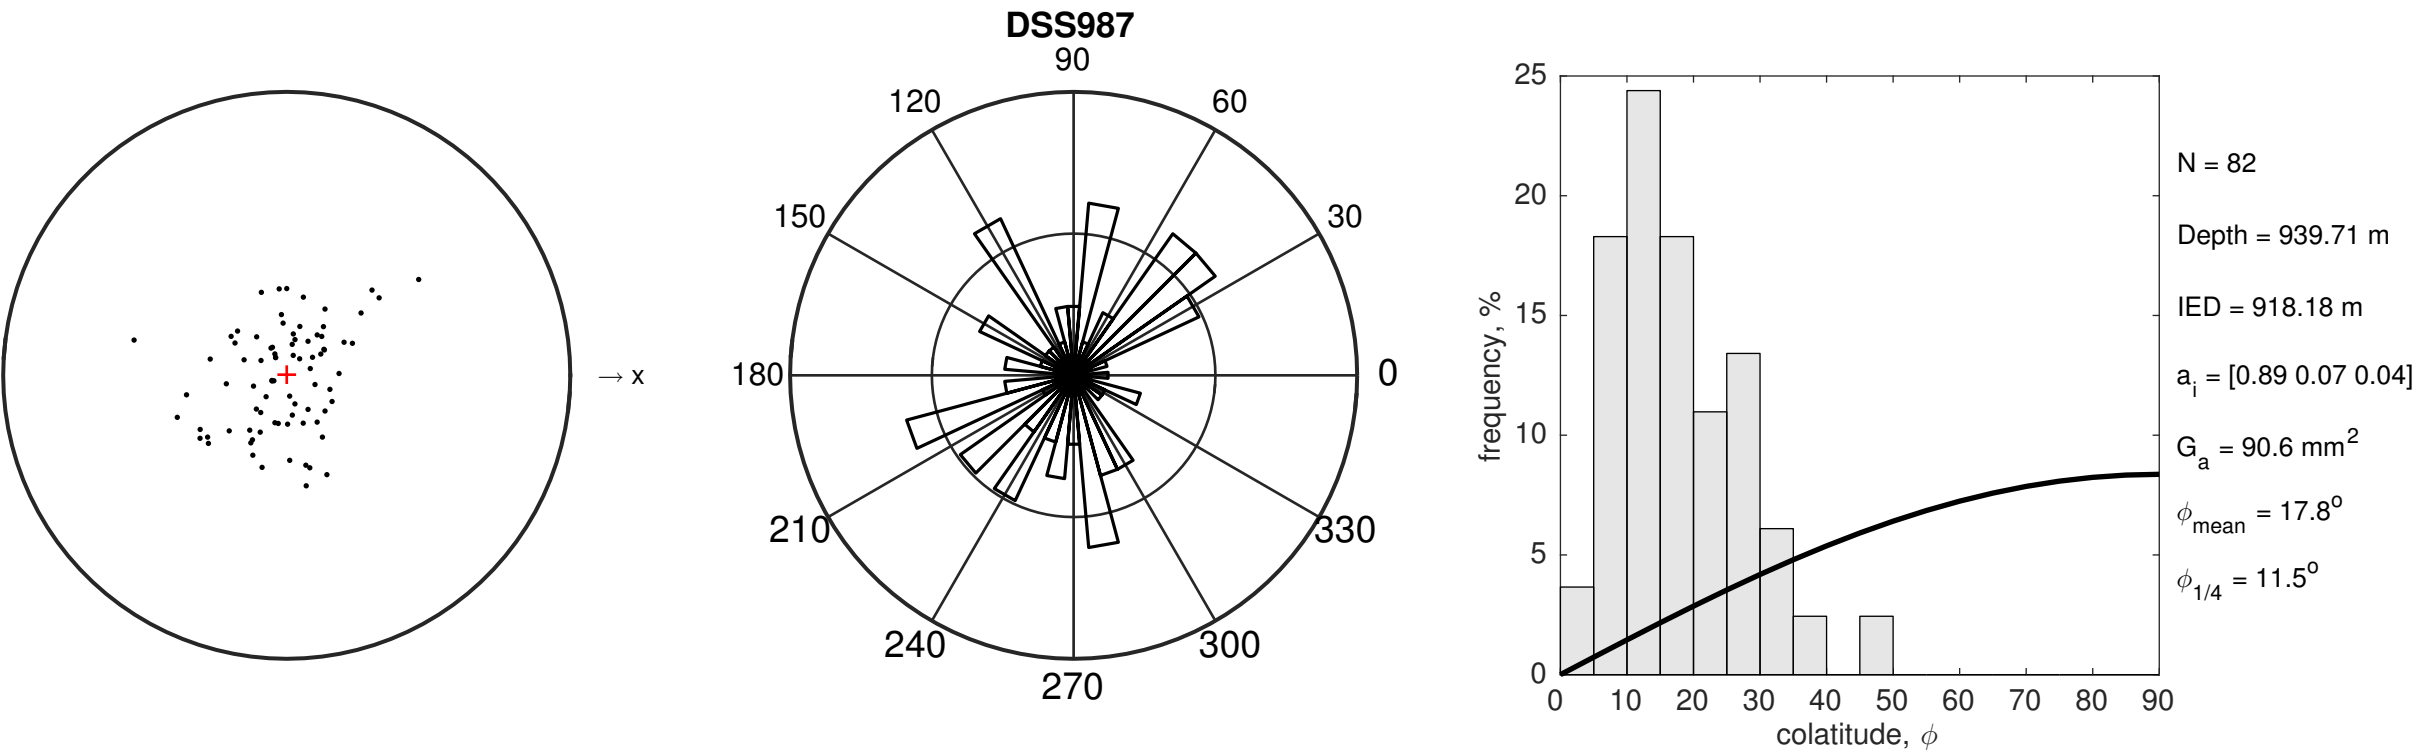

Supplement: Supplementary file 34 [file essd-2015-45-supplement.zip]

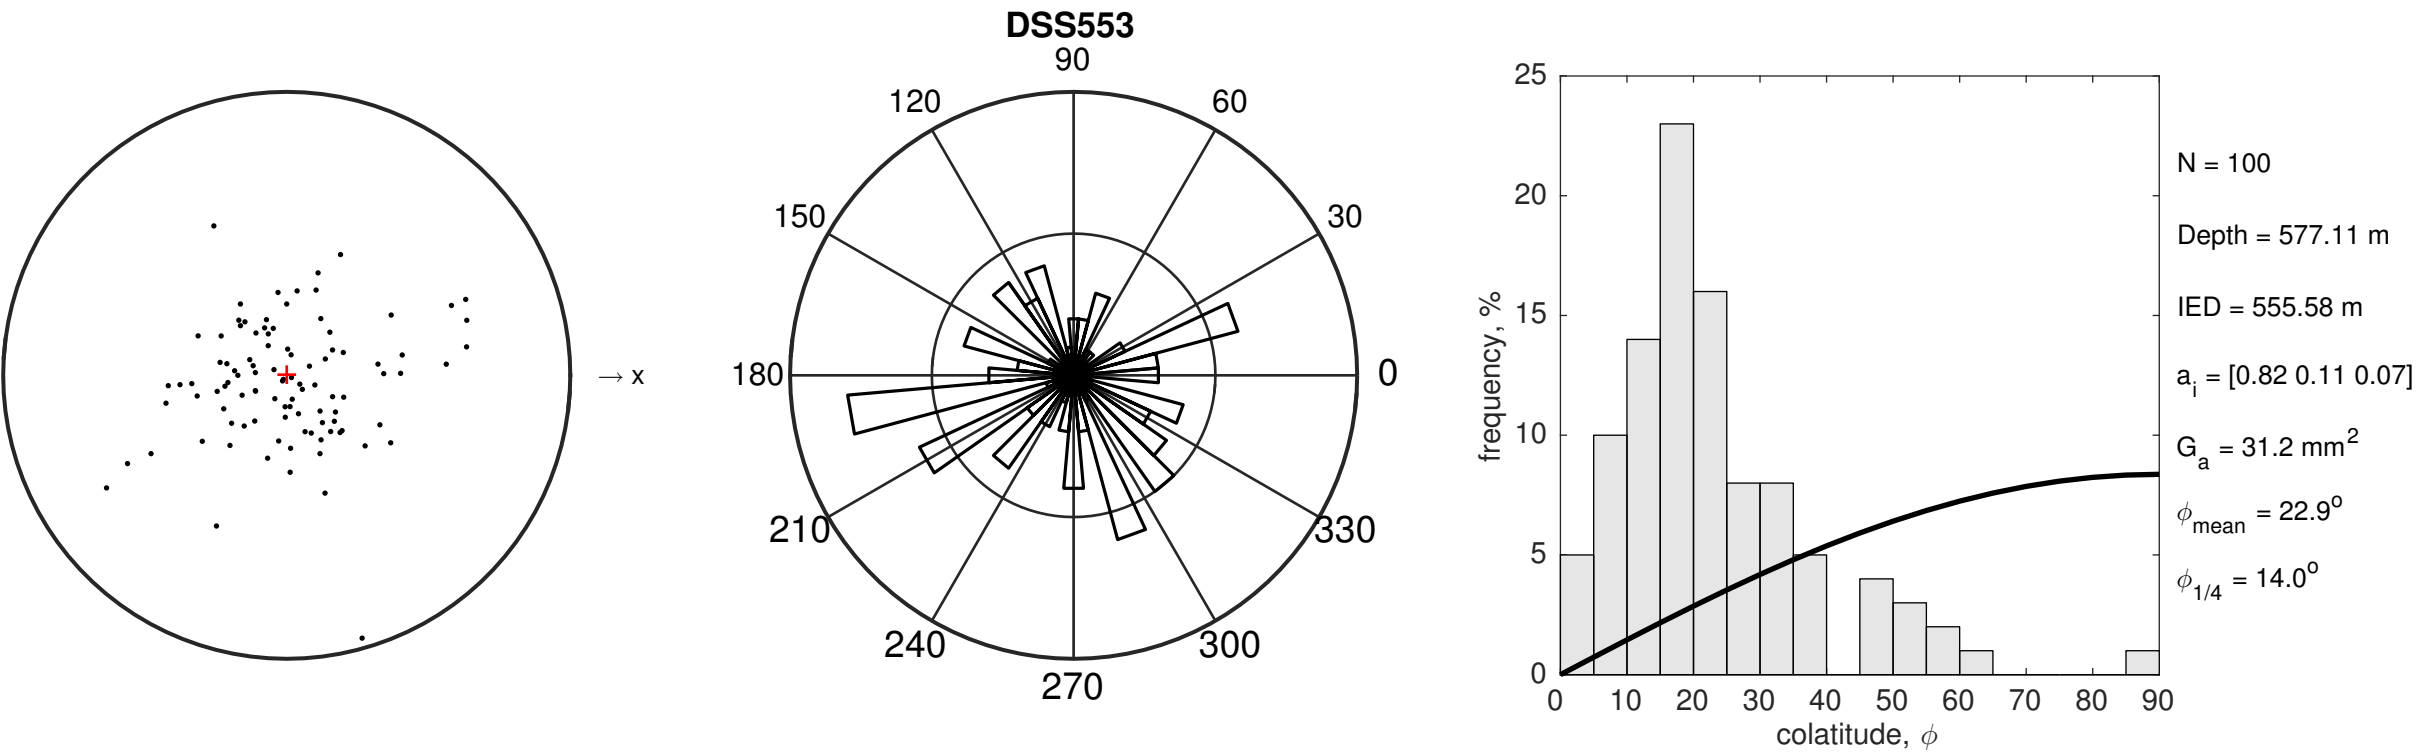

Supplement: Supplementary file 35 [file essd-2015-45-supplement.zip]

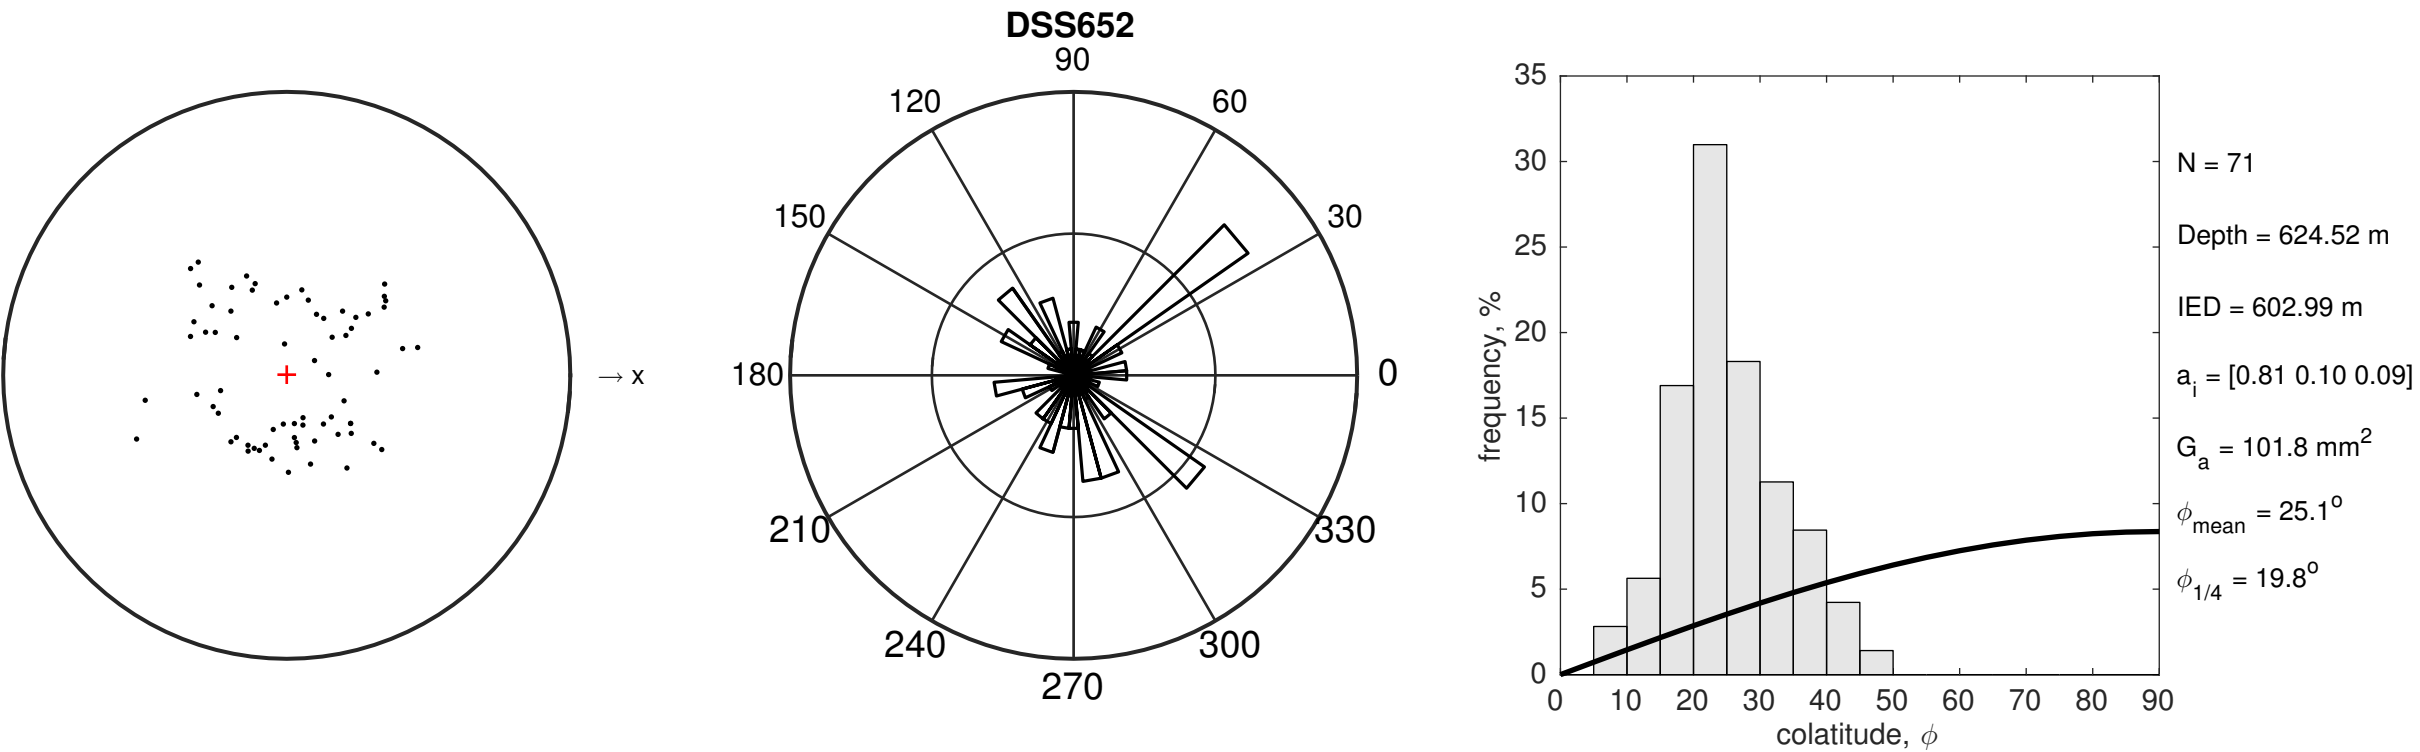

Supplement: Supplementary file 36 [file essd-2015-45-supplement.zip]

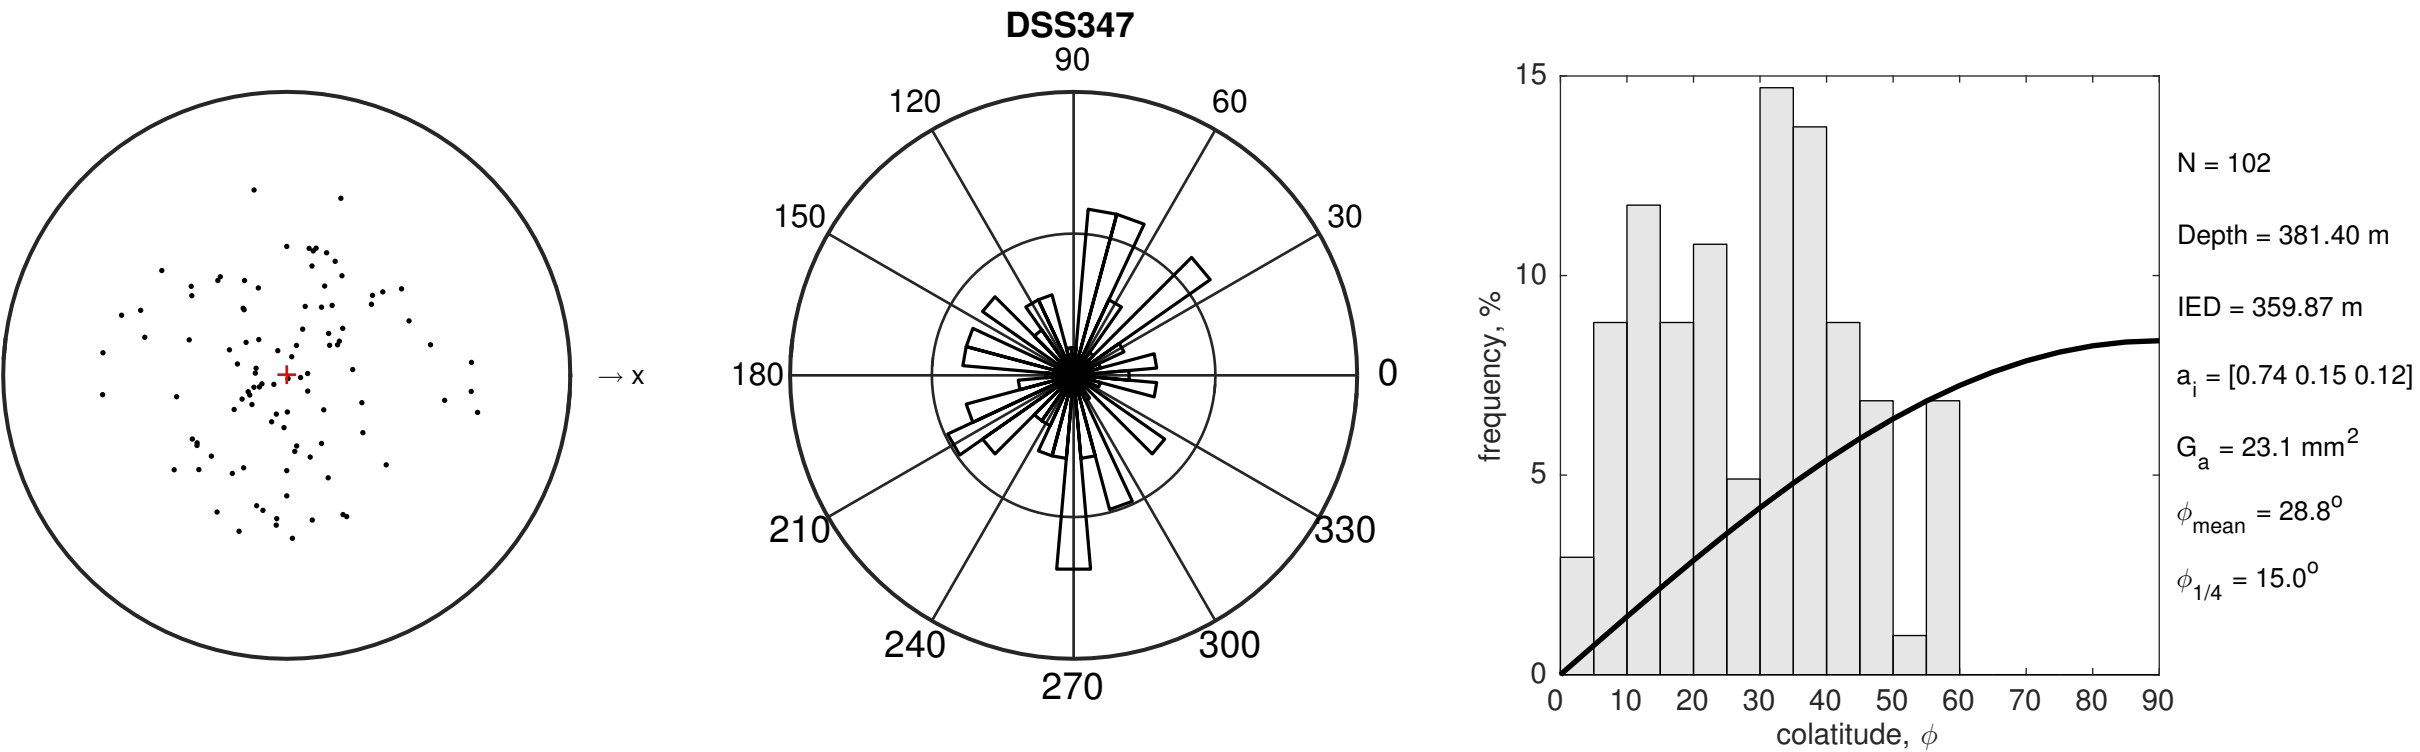

Supplement: Supplementary file 37 [file essd-2015-45-supplement.zip]

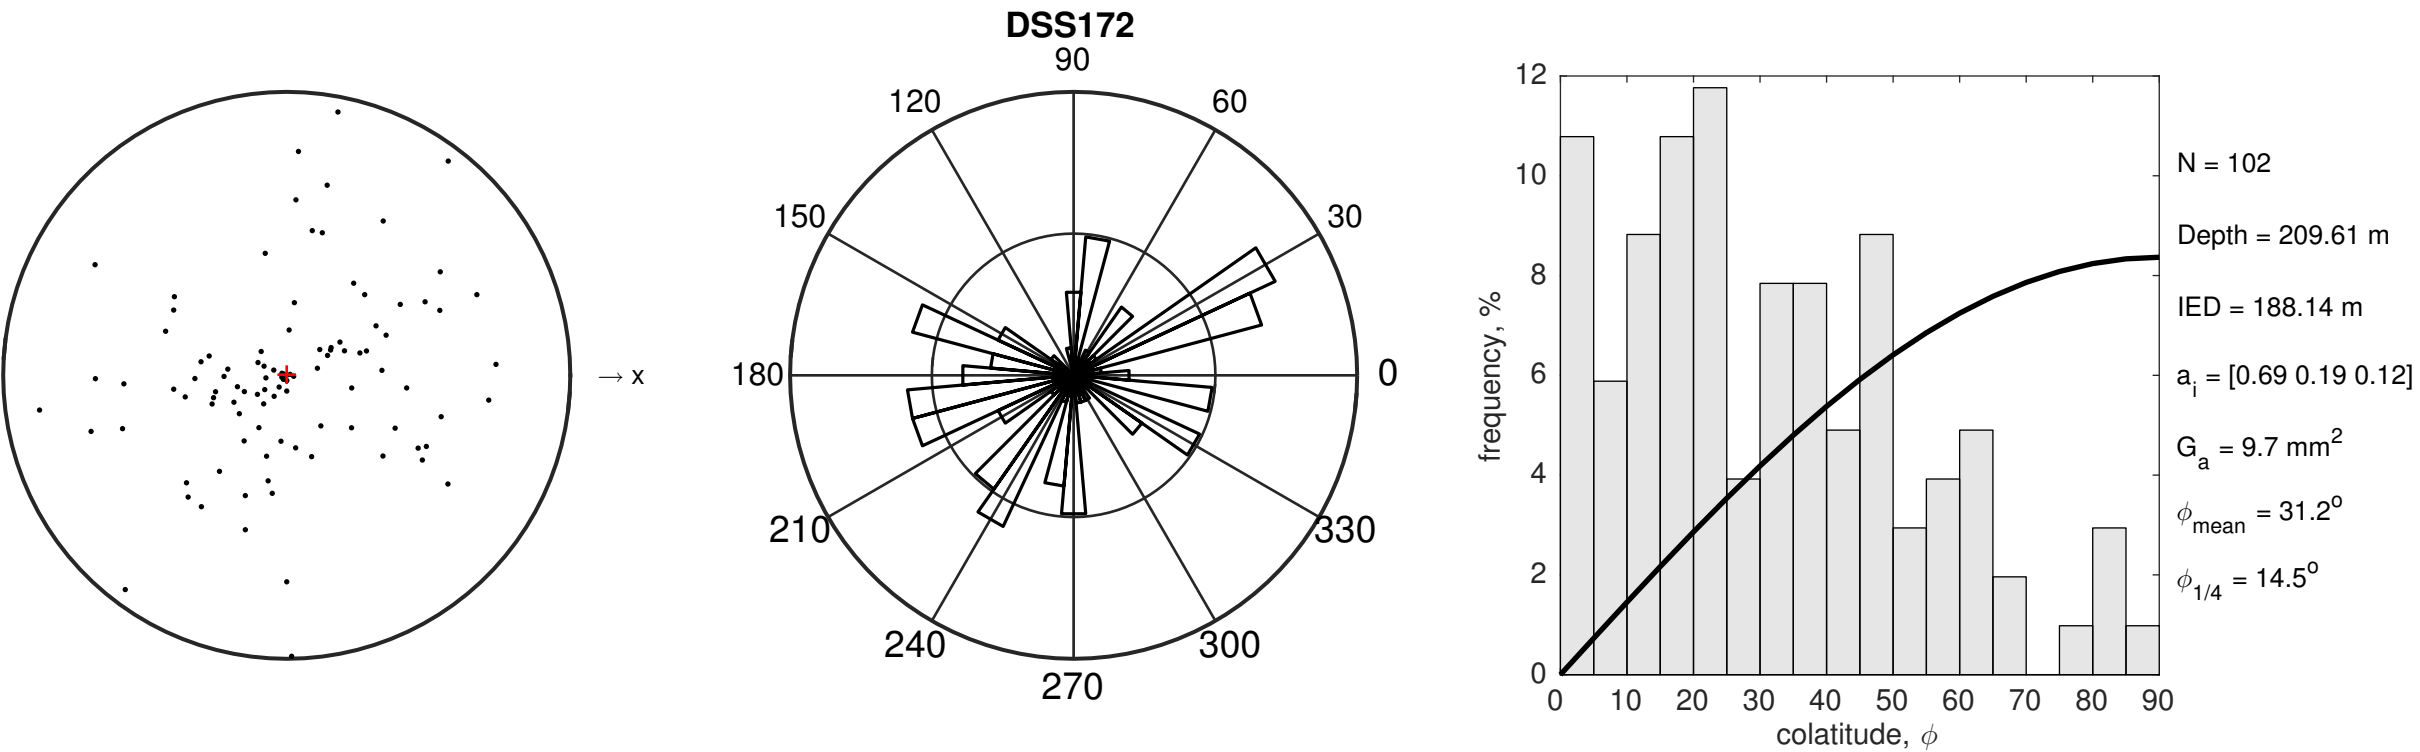

Supplement: Supplementary file 38 [file essd-2015-45-supplement.zip]

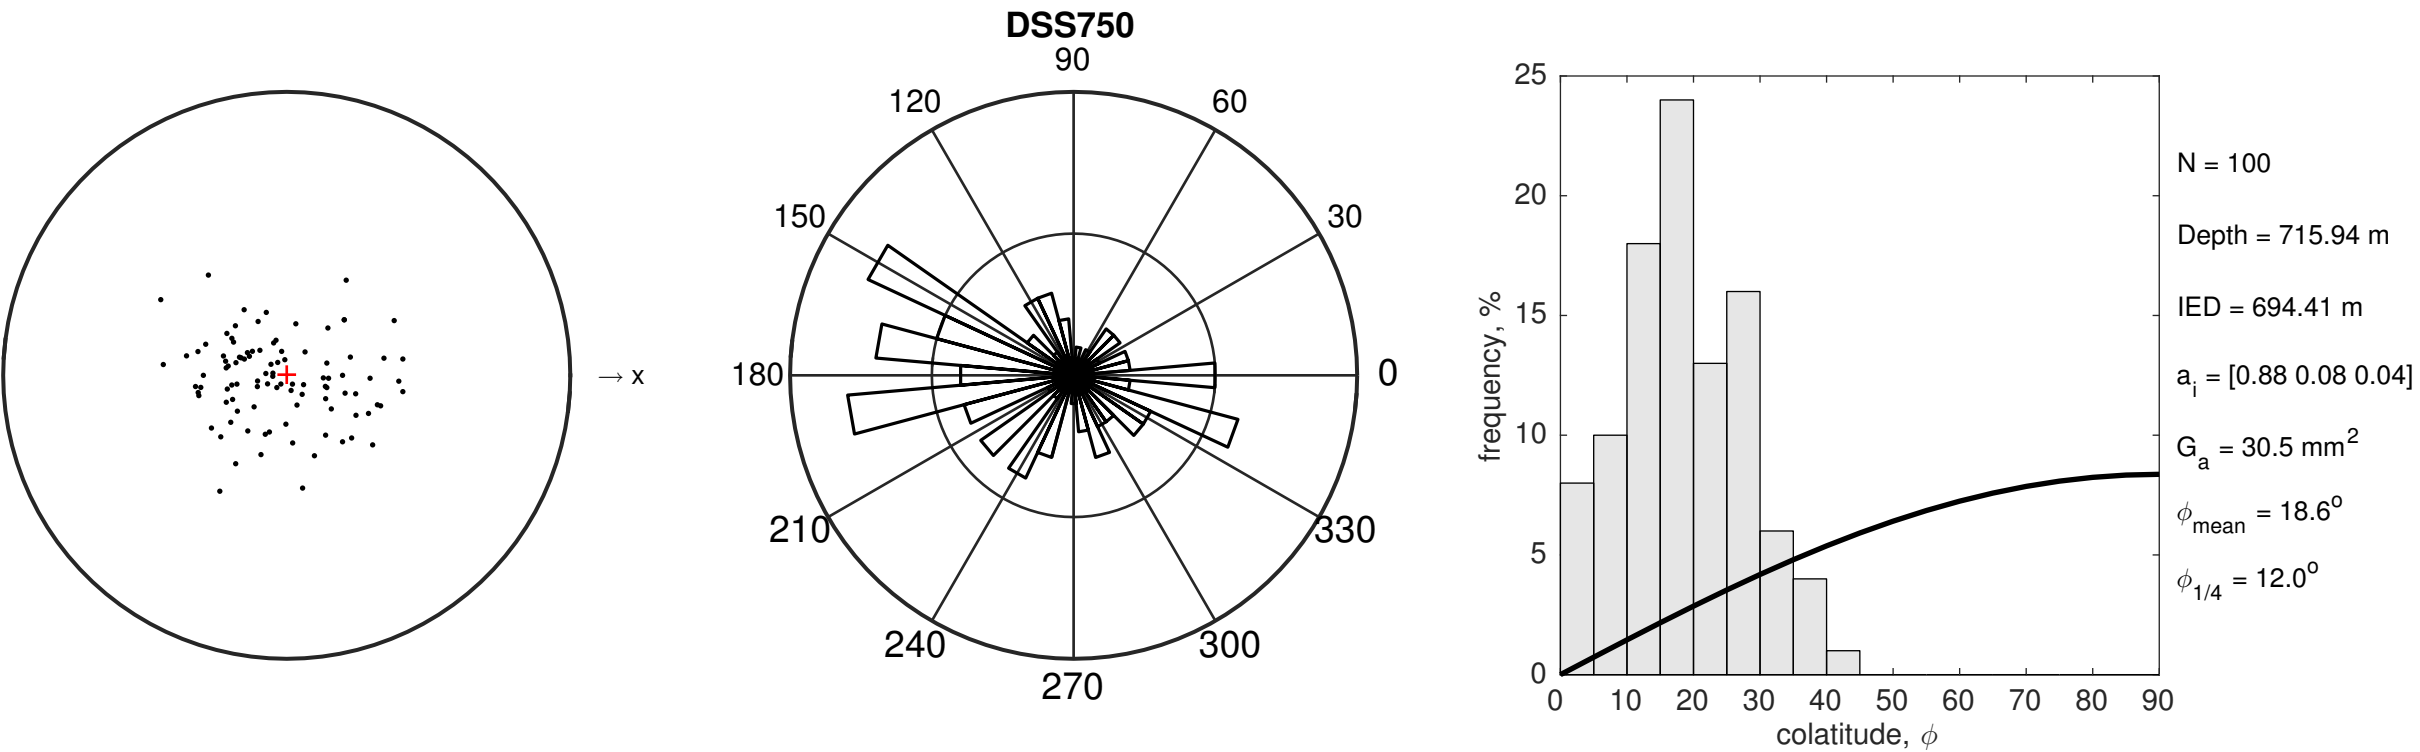

Supplement: Supplementary file 39 [file essd-2015-45-supplement.zip]

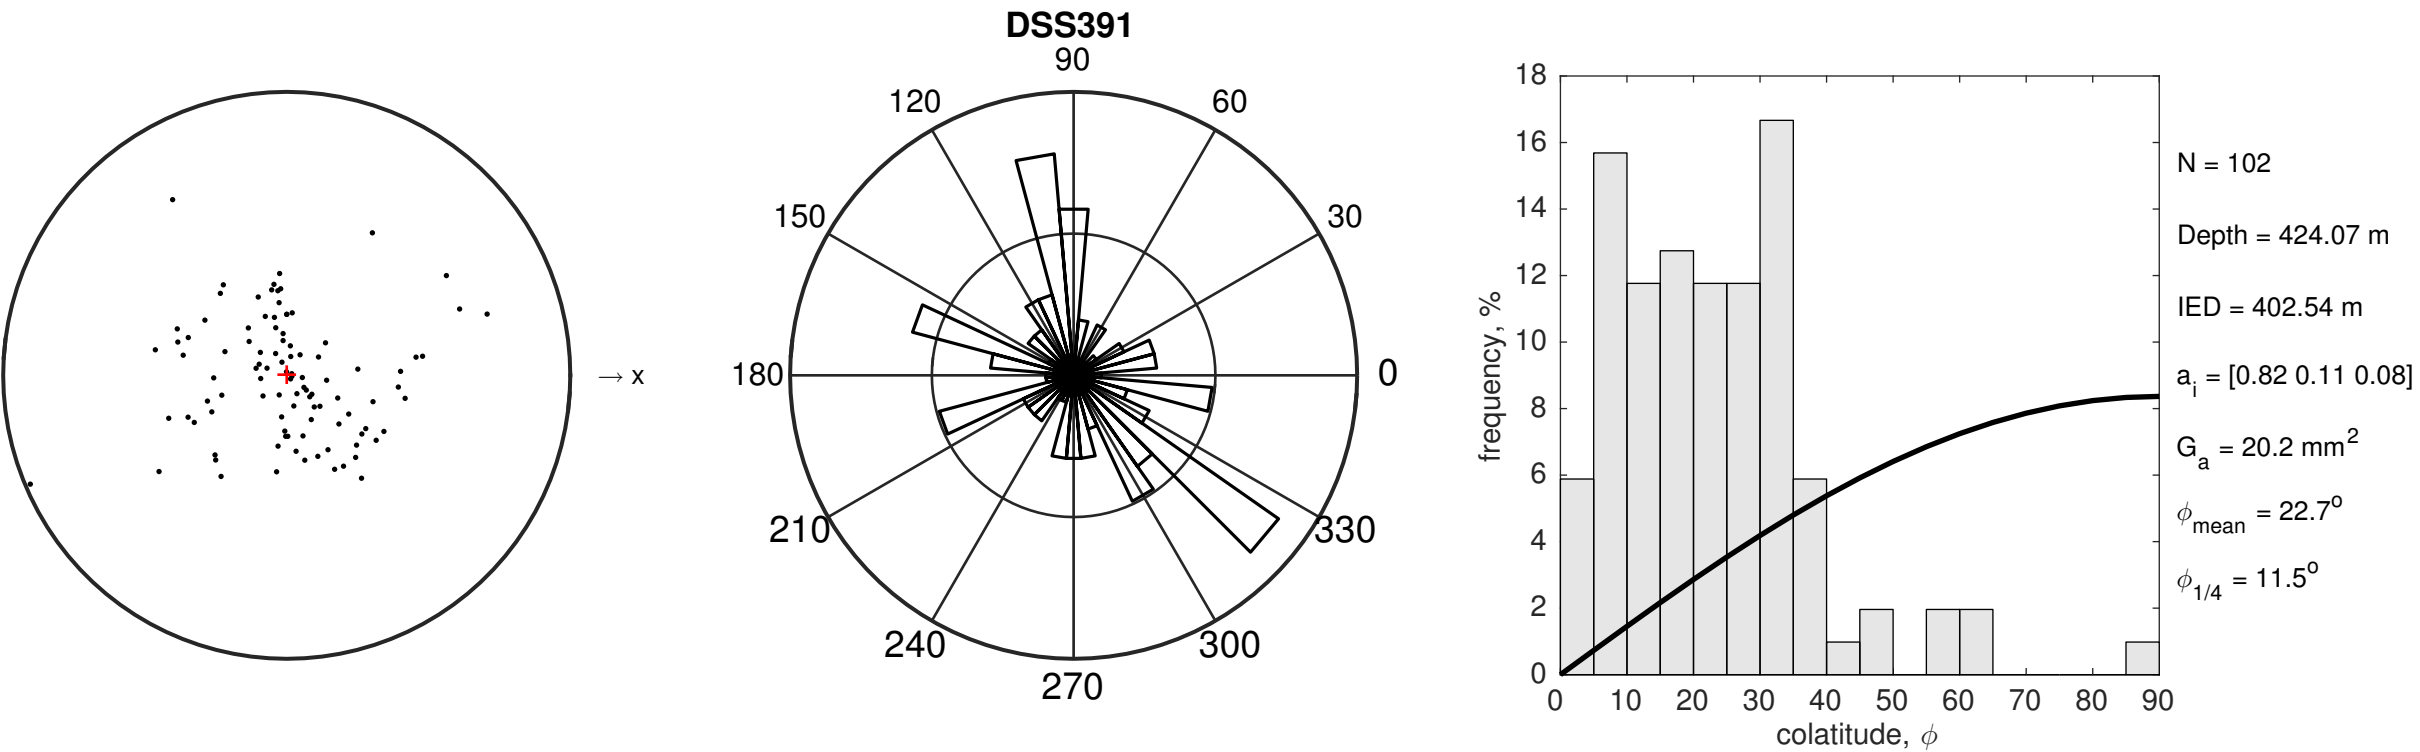

Supplement: Supplementary file 40 [file essd-2015-45-supplement.zip]

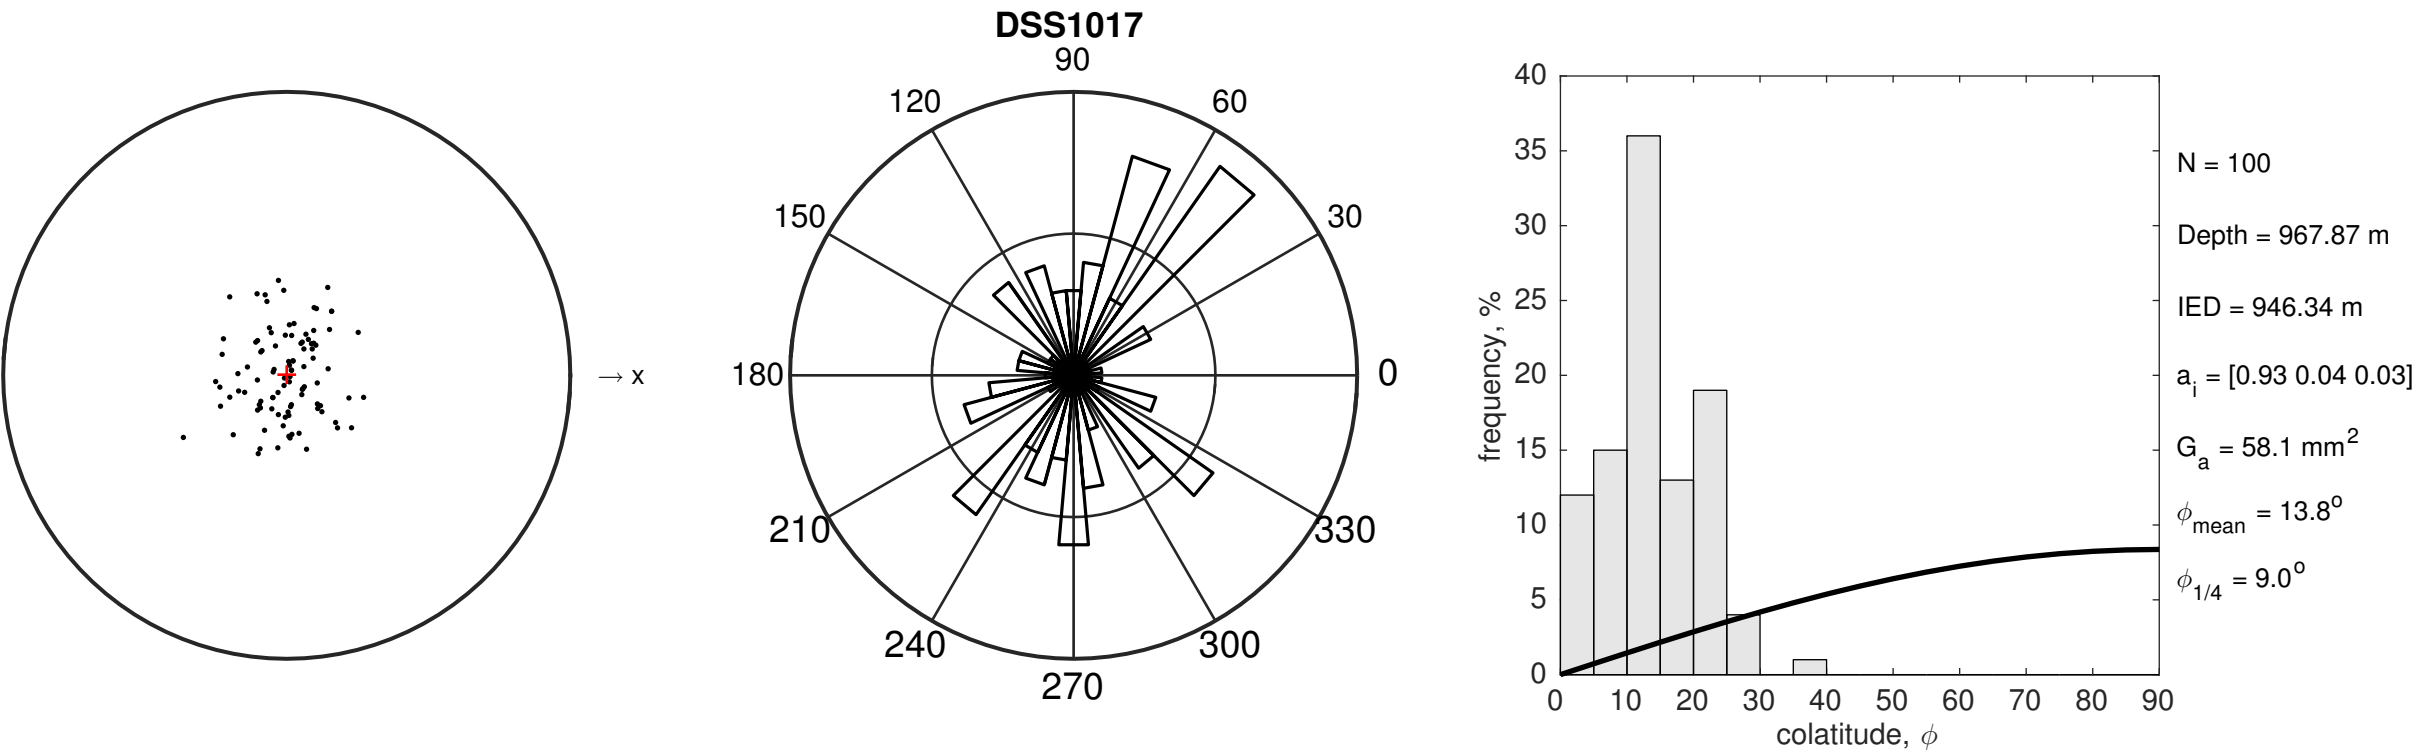

Supplement: Supplementary file 41 [file essd-2015-45-supplement.zip]

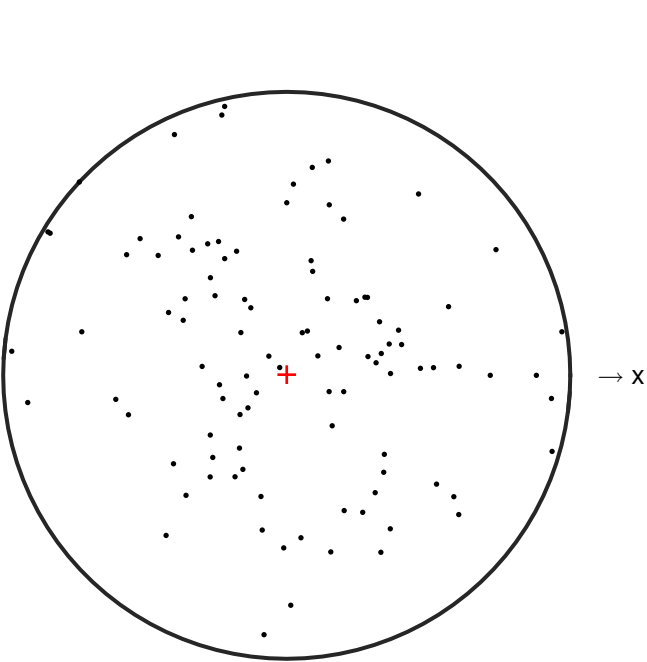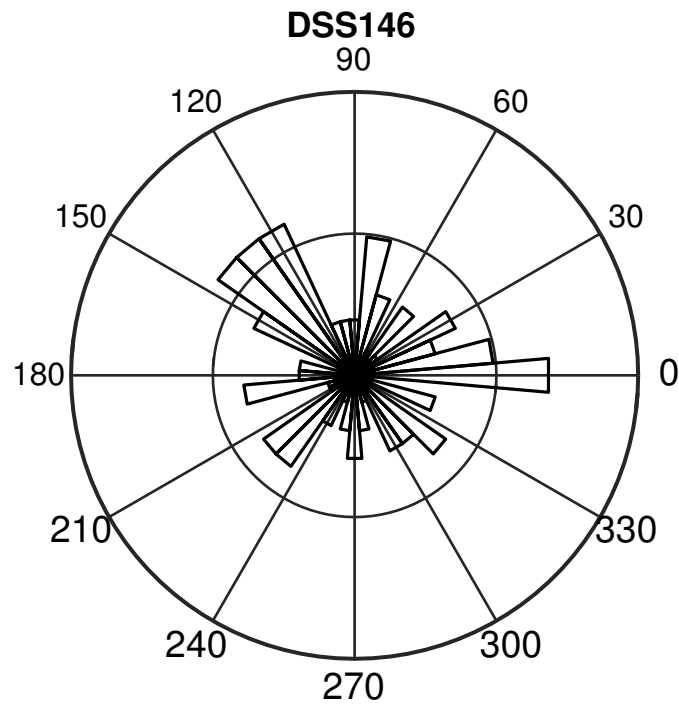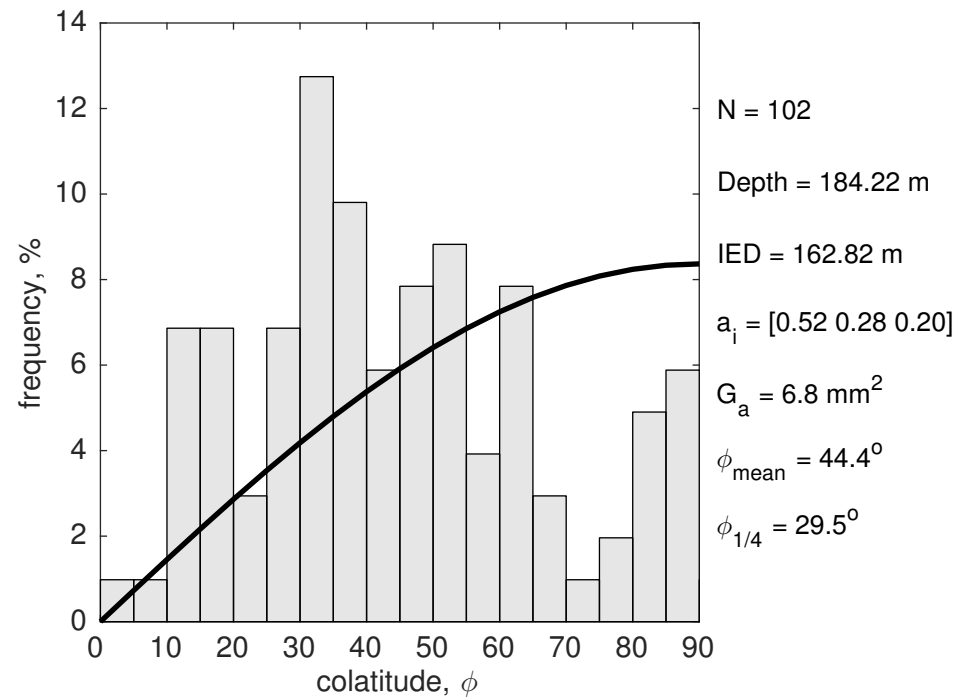

Supplement: Supplementary file 42 [file essd-2015-45-supplement.zip]

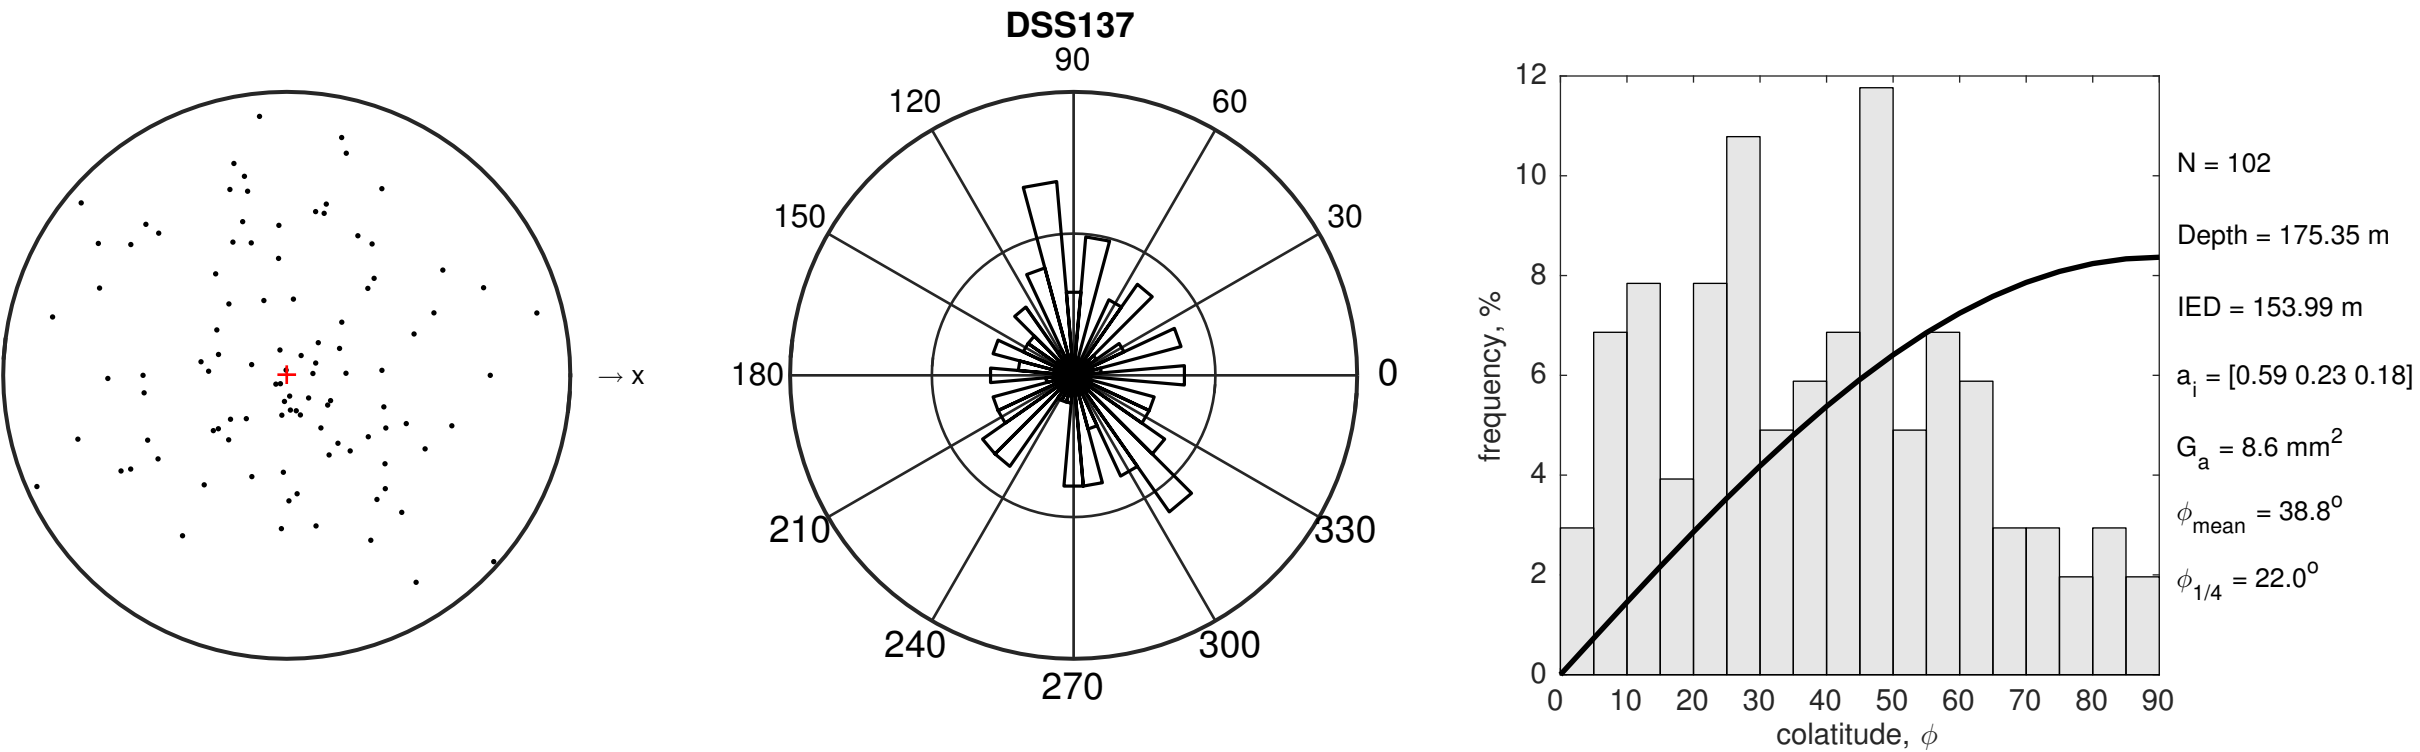

Supplement: Supplementary file 43 [file essd-2015-45-supplement.zip]

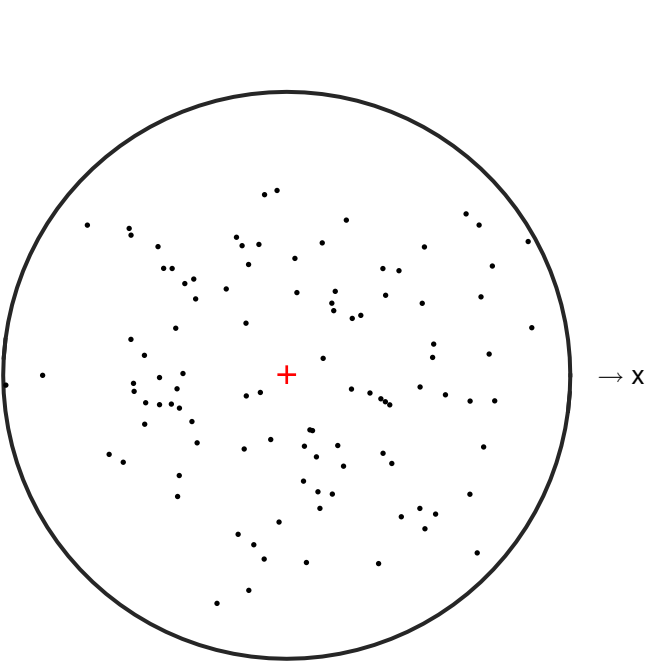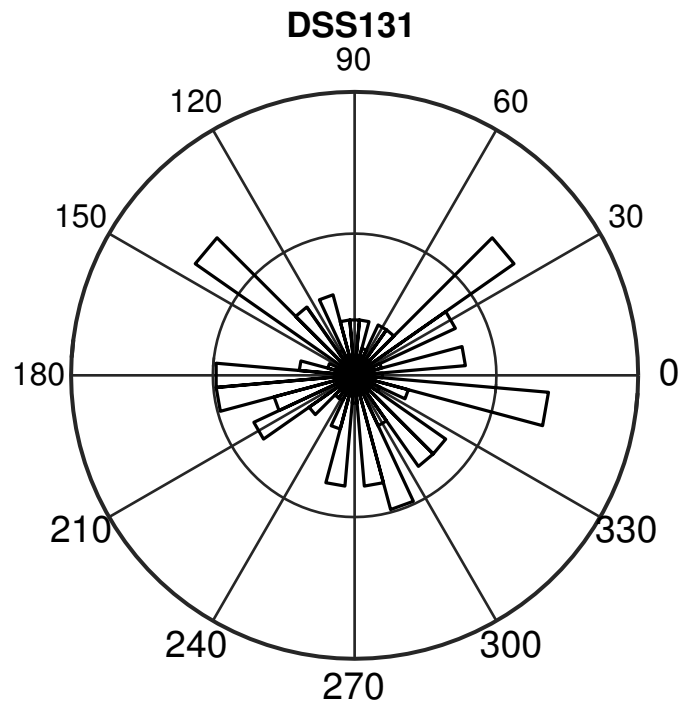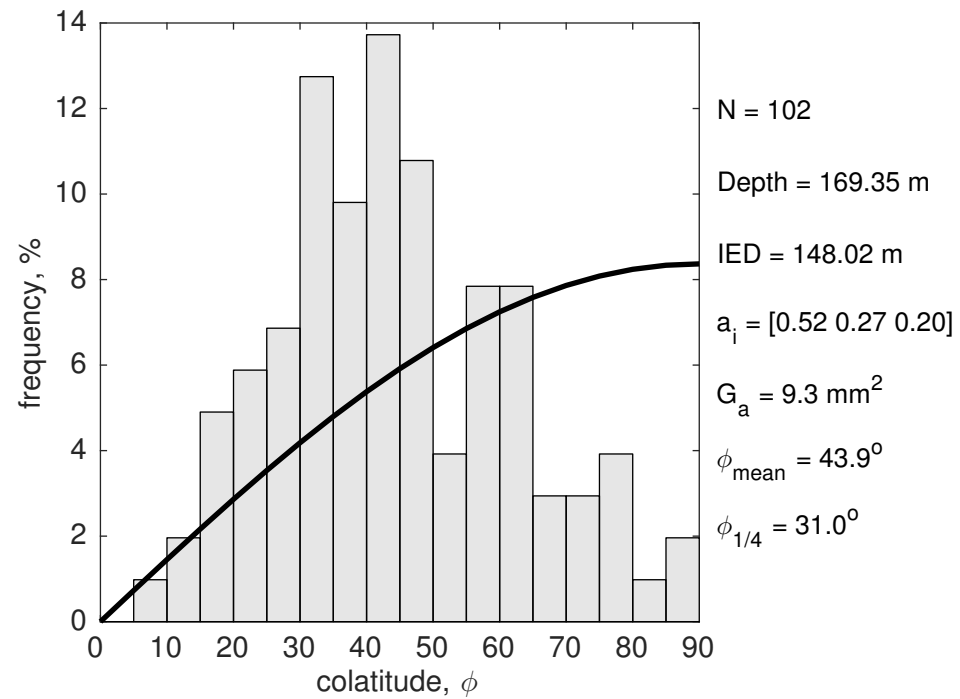

Supplement: Supplementary file 44 [file essd-2015-45-supplement.zip]

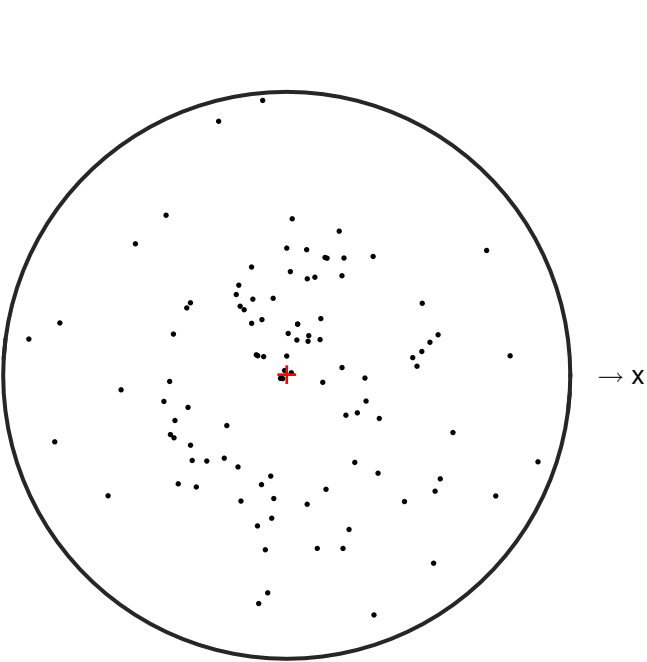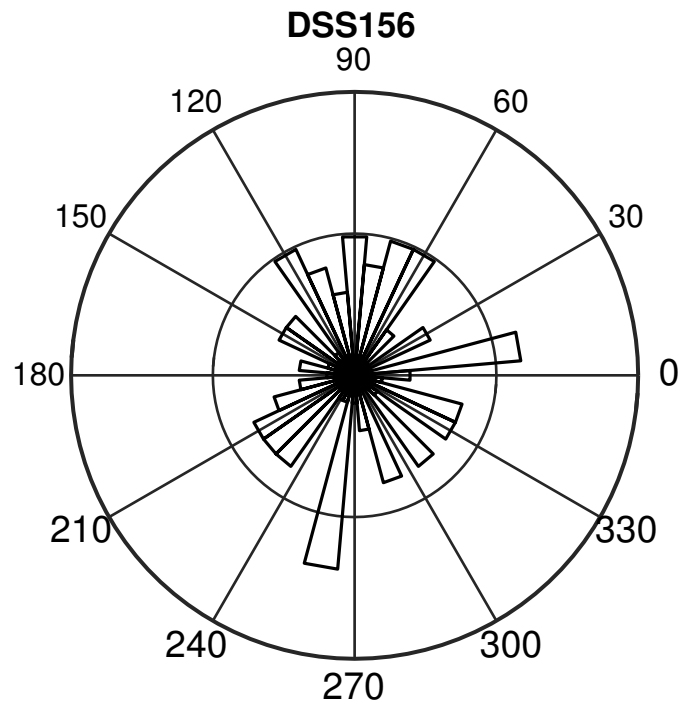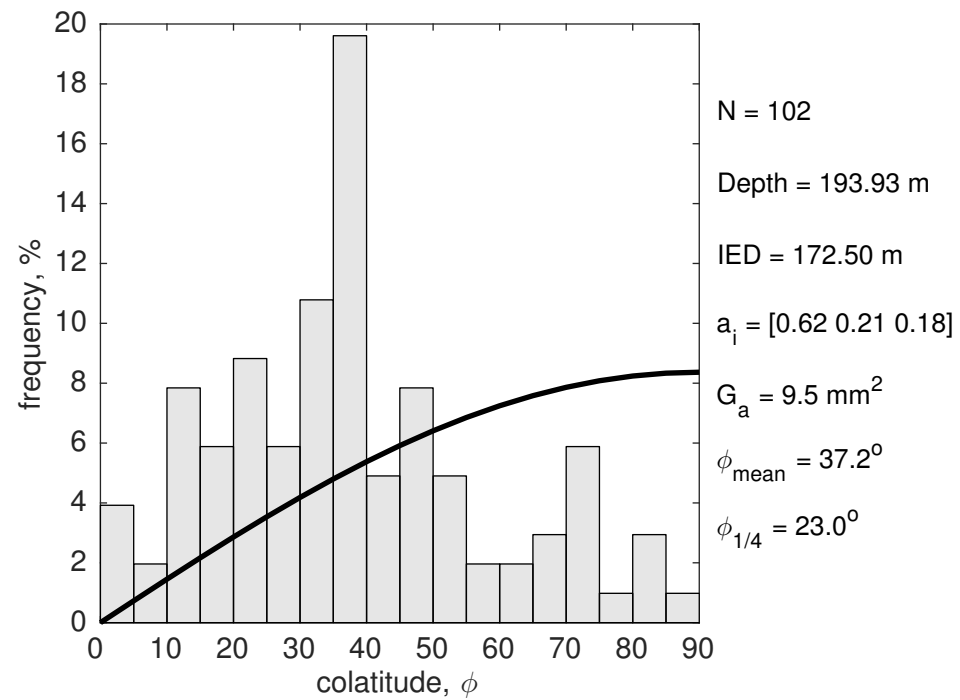

Supplement: Supplementary file 45 [file essd-2015-45-supplement.zip]

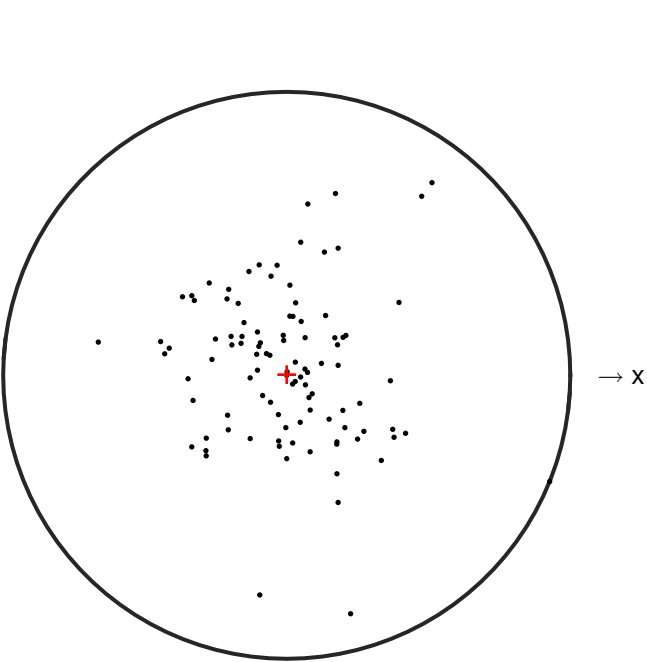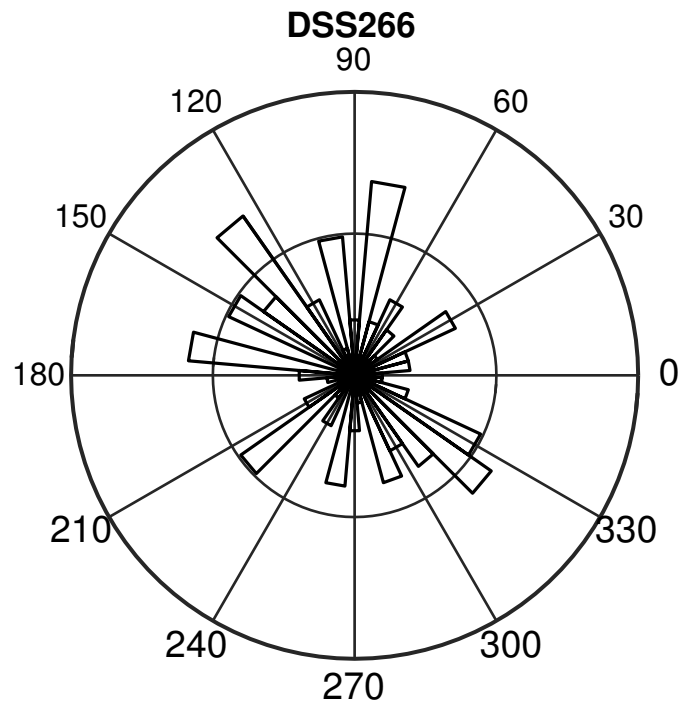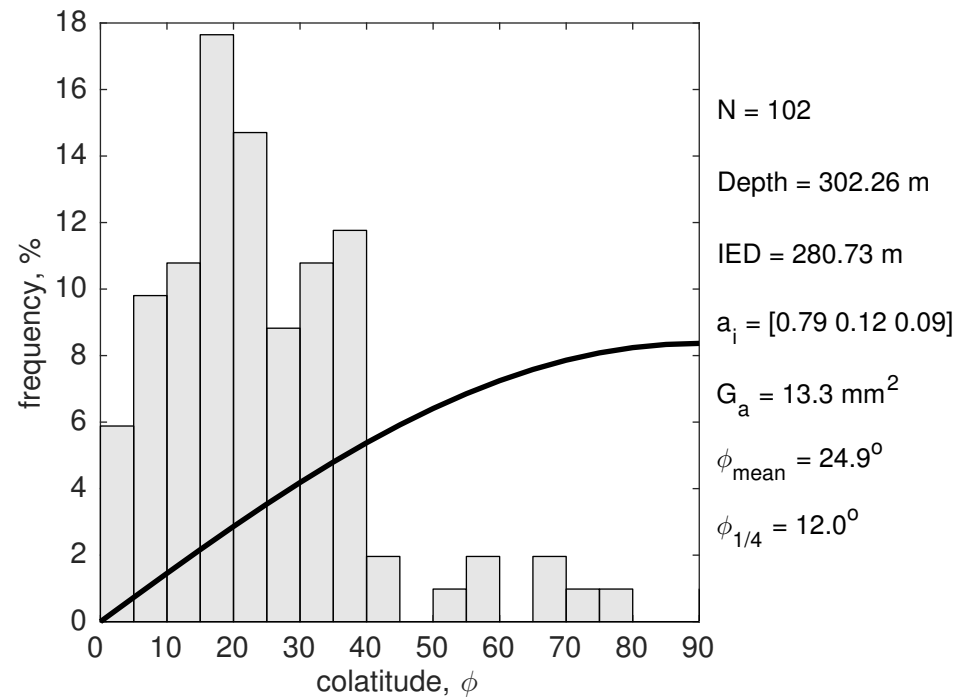

Supplement: Supplementary file 46 [file essd-2015-45-supplement.zip]

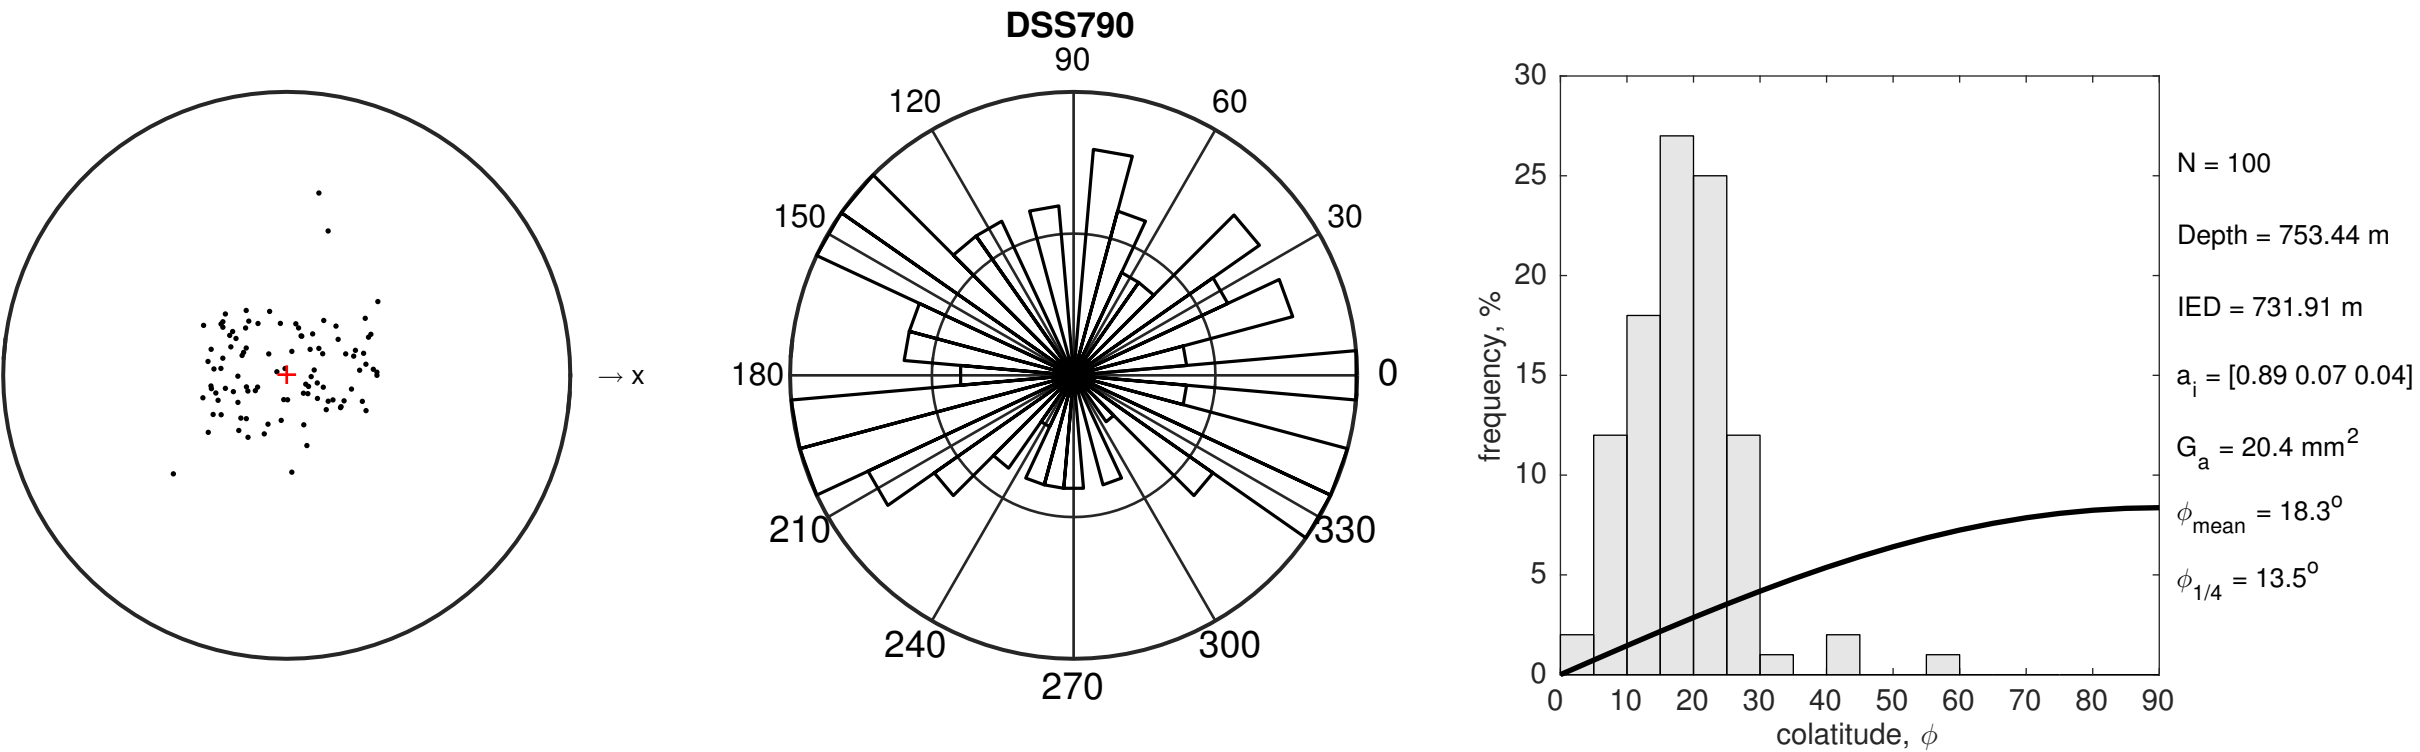

Supplement: Supplementary file 47 [file essd-2015-45-supplement.zip]

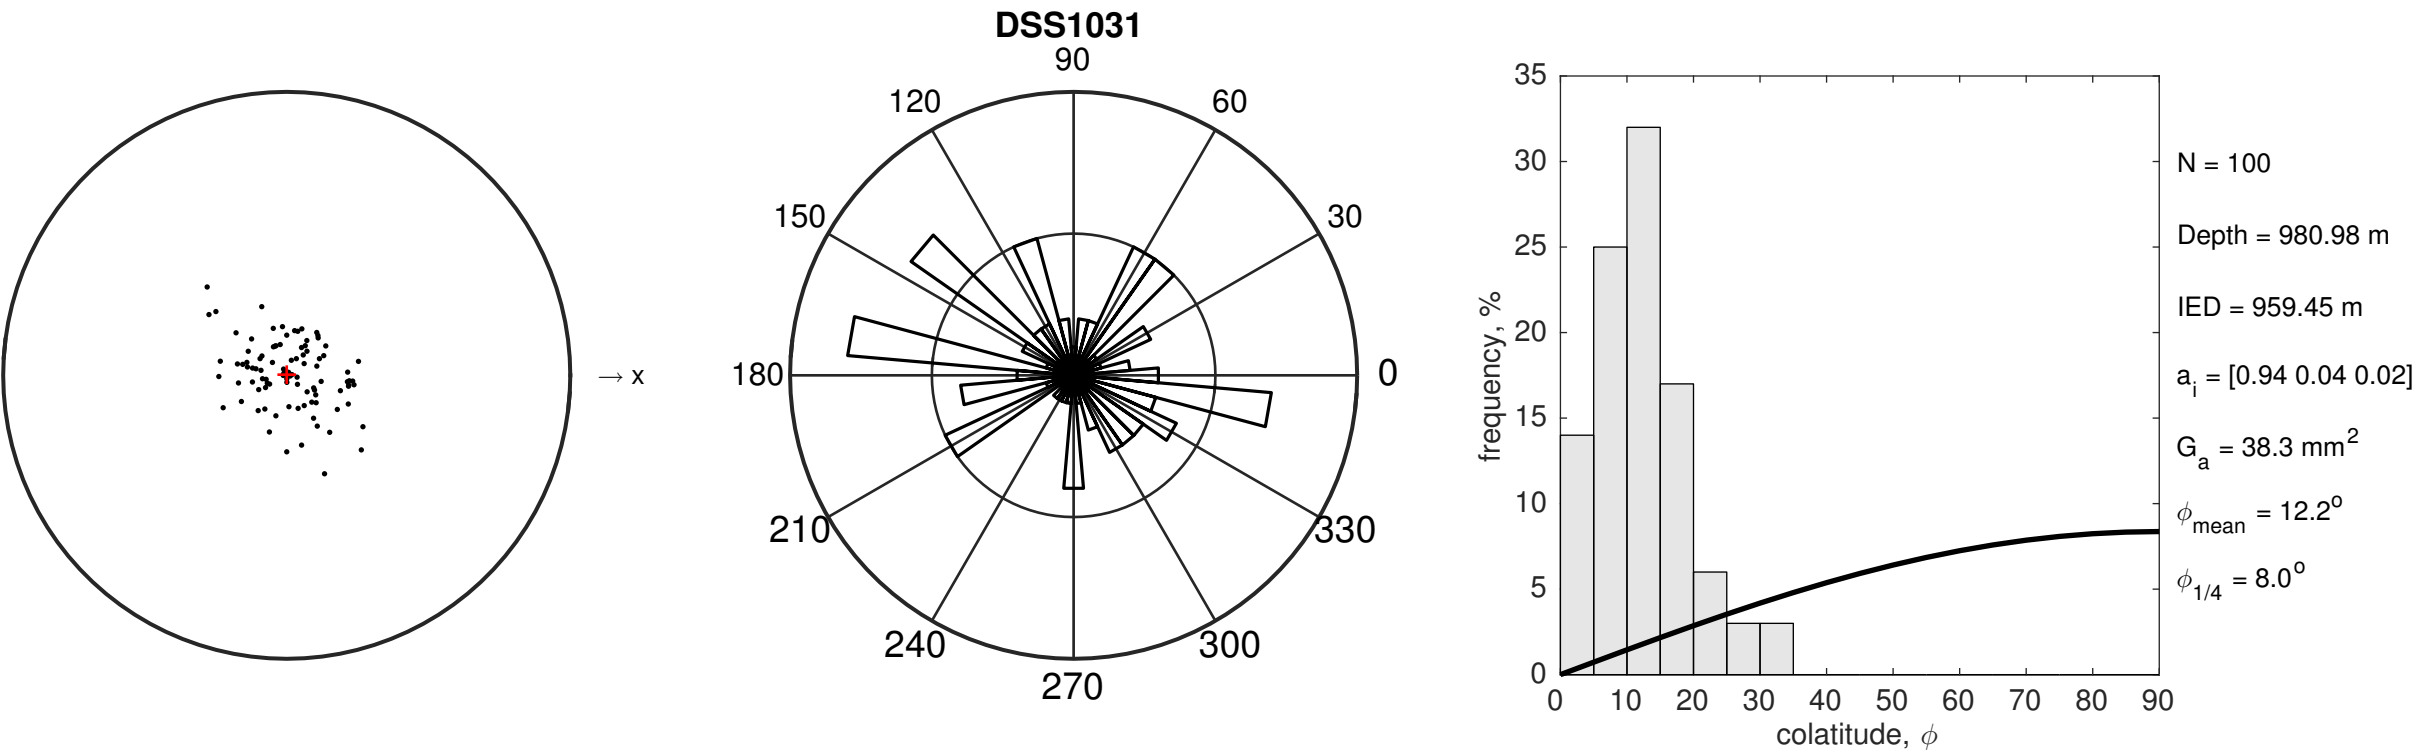

Supplement: Supplementary file 48 [file essd-2015-45-supplement.zip]

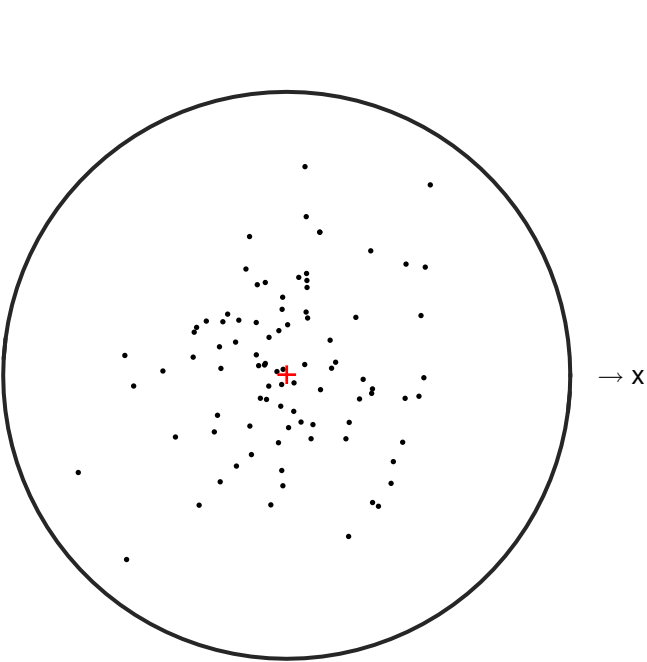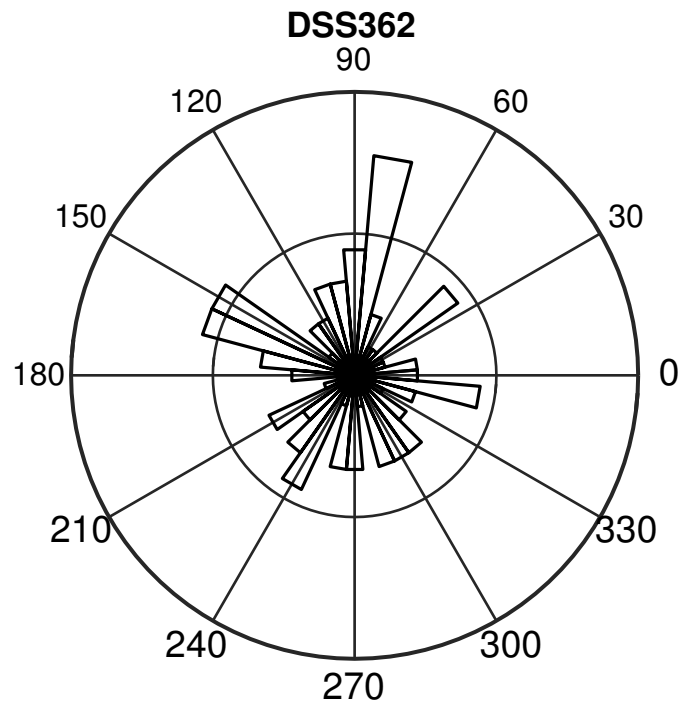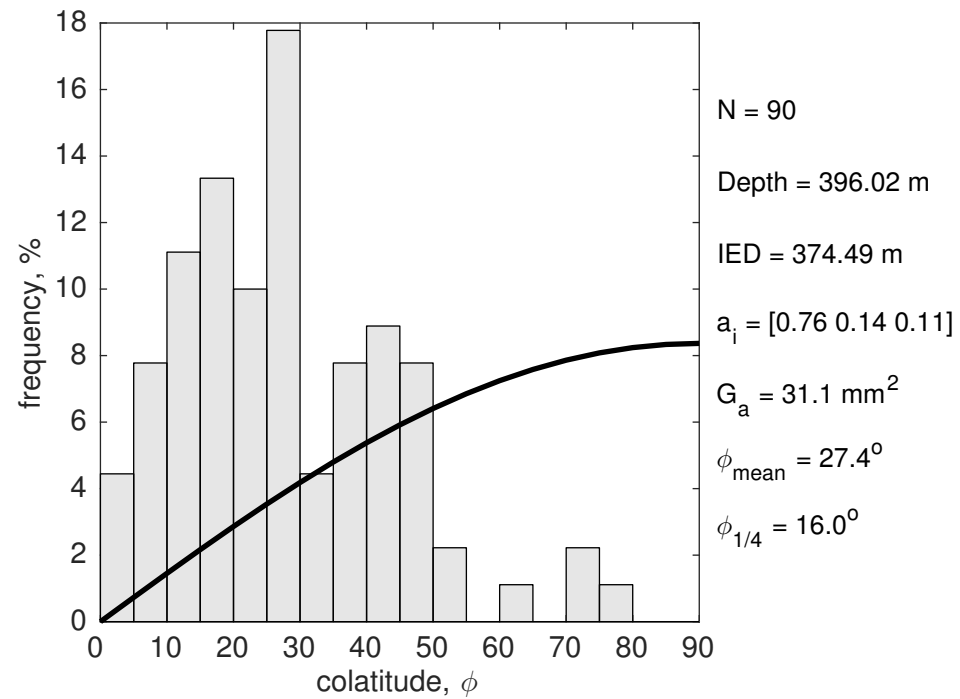

Supplement: Supplementary file 49 [file essd-2015-45-supplement.zip]

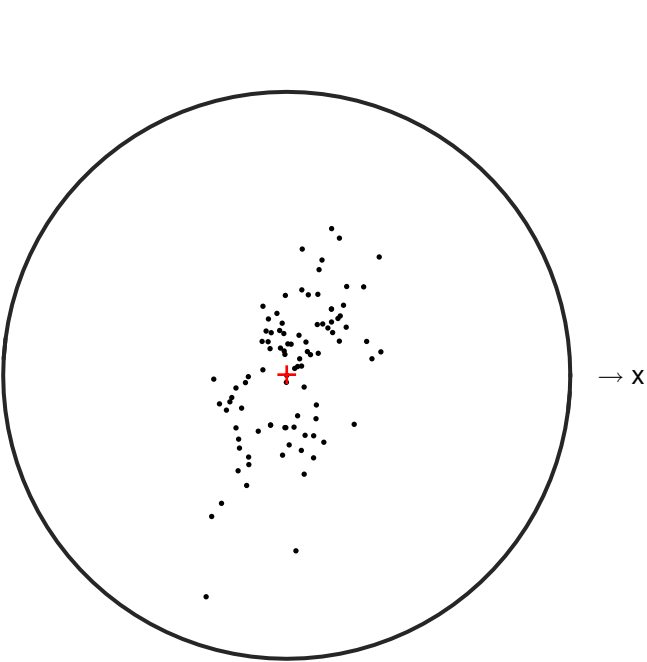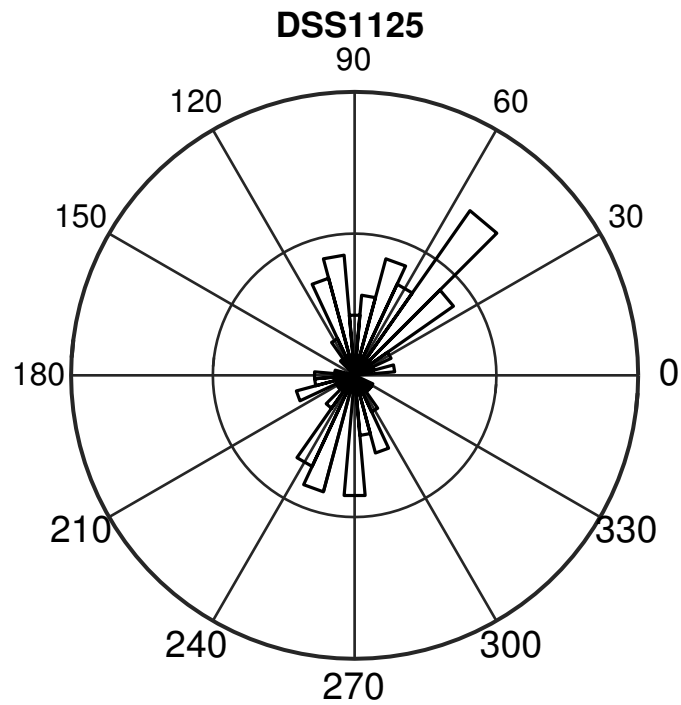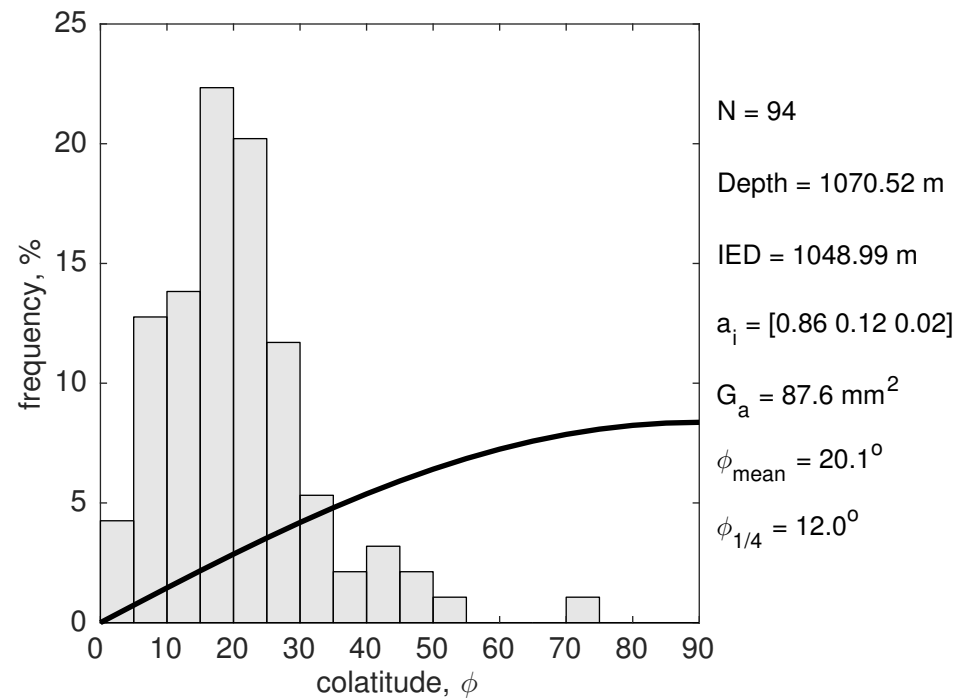

Supplement: Supplementary file 50 [file essd-2015-45-supplement.zip]

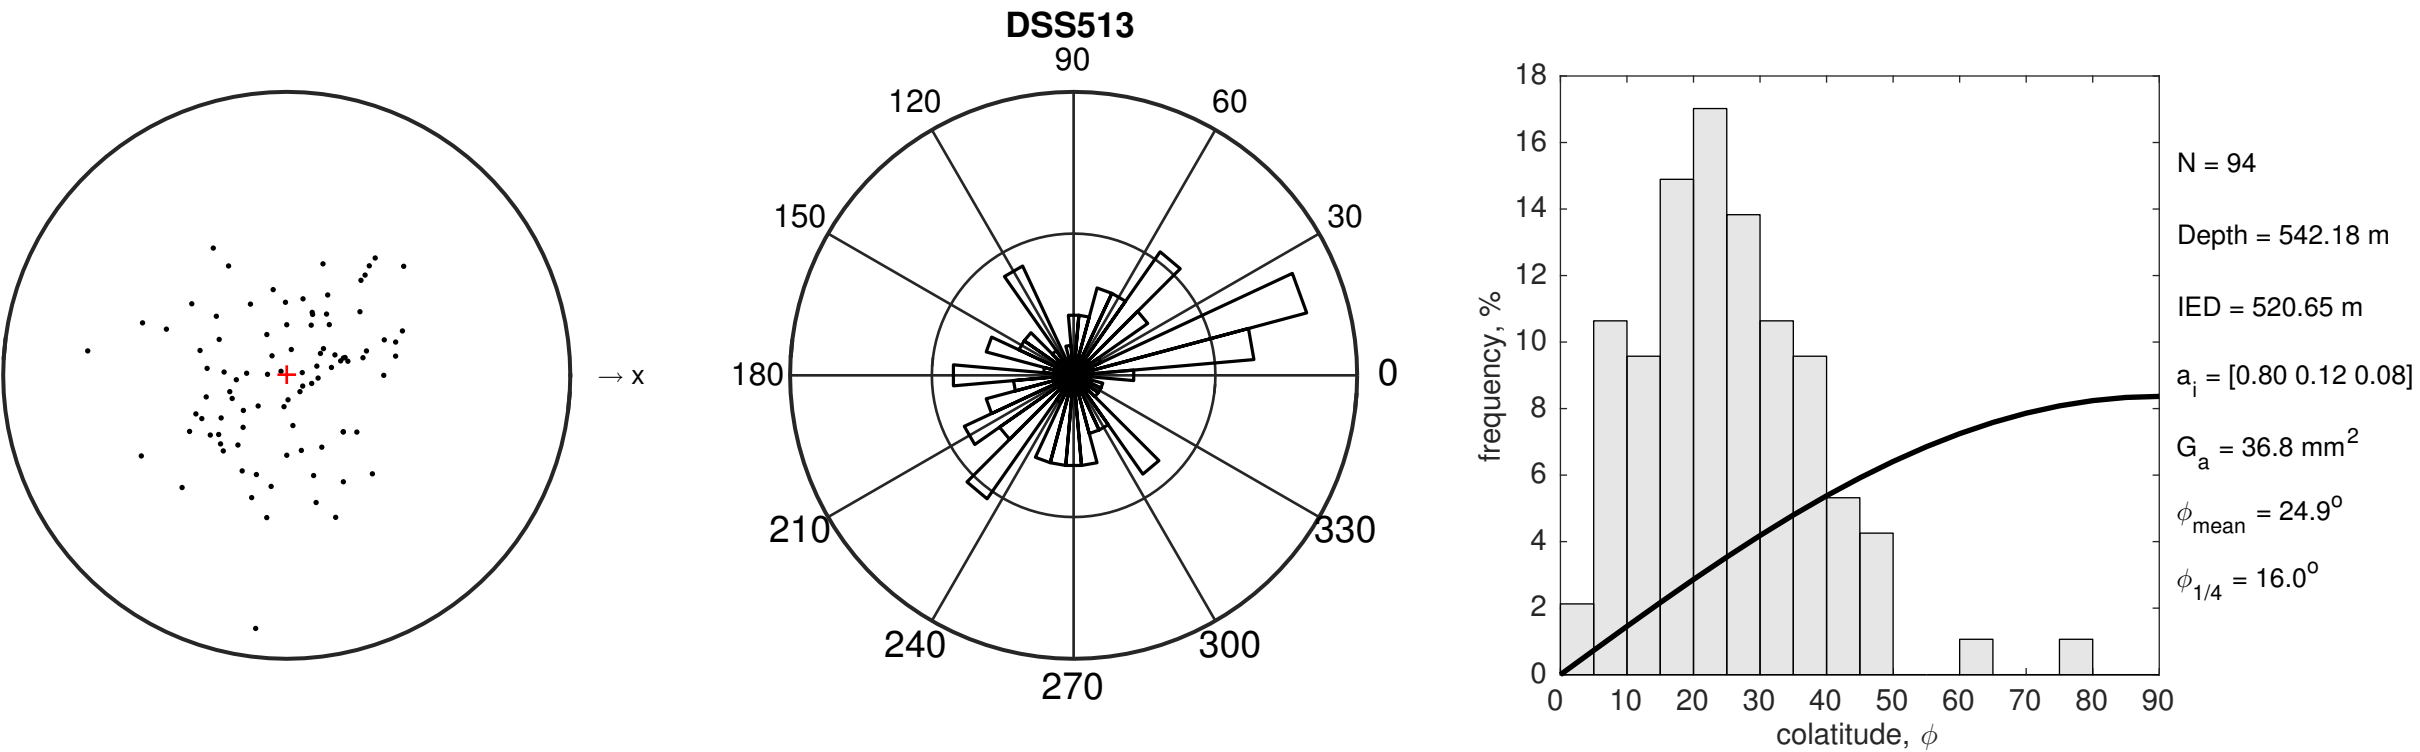

Supplement: Supplementary file 51 [file essd-2015-45-supplement.zip]

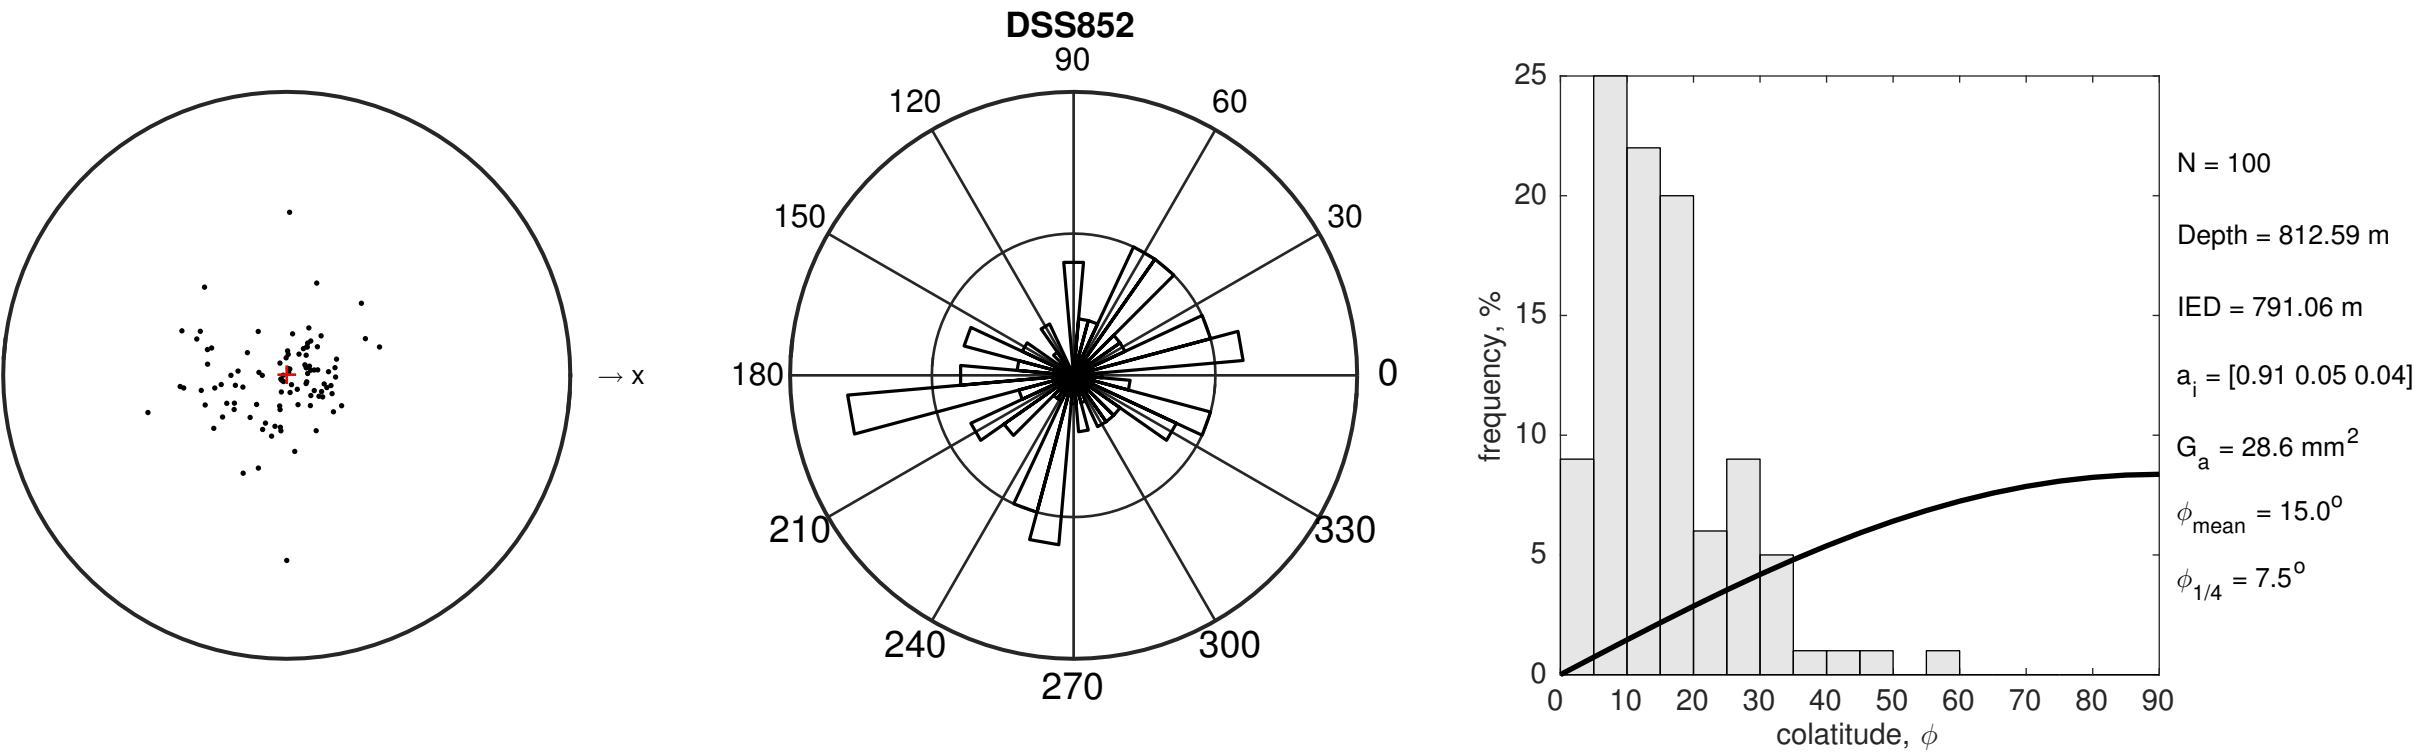

Supplement: Supplementary file 52 [file essd-2015-45-supplement.zip]

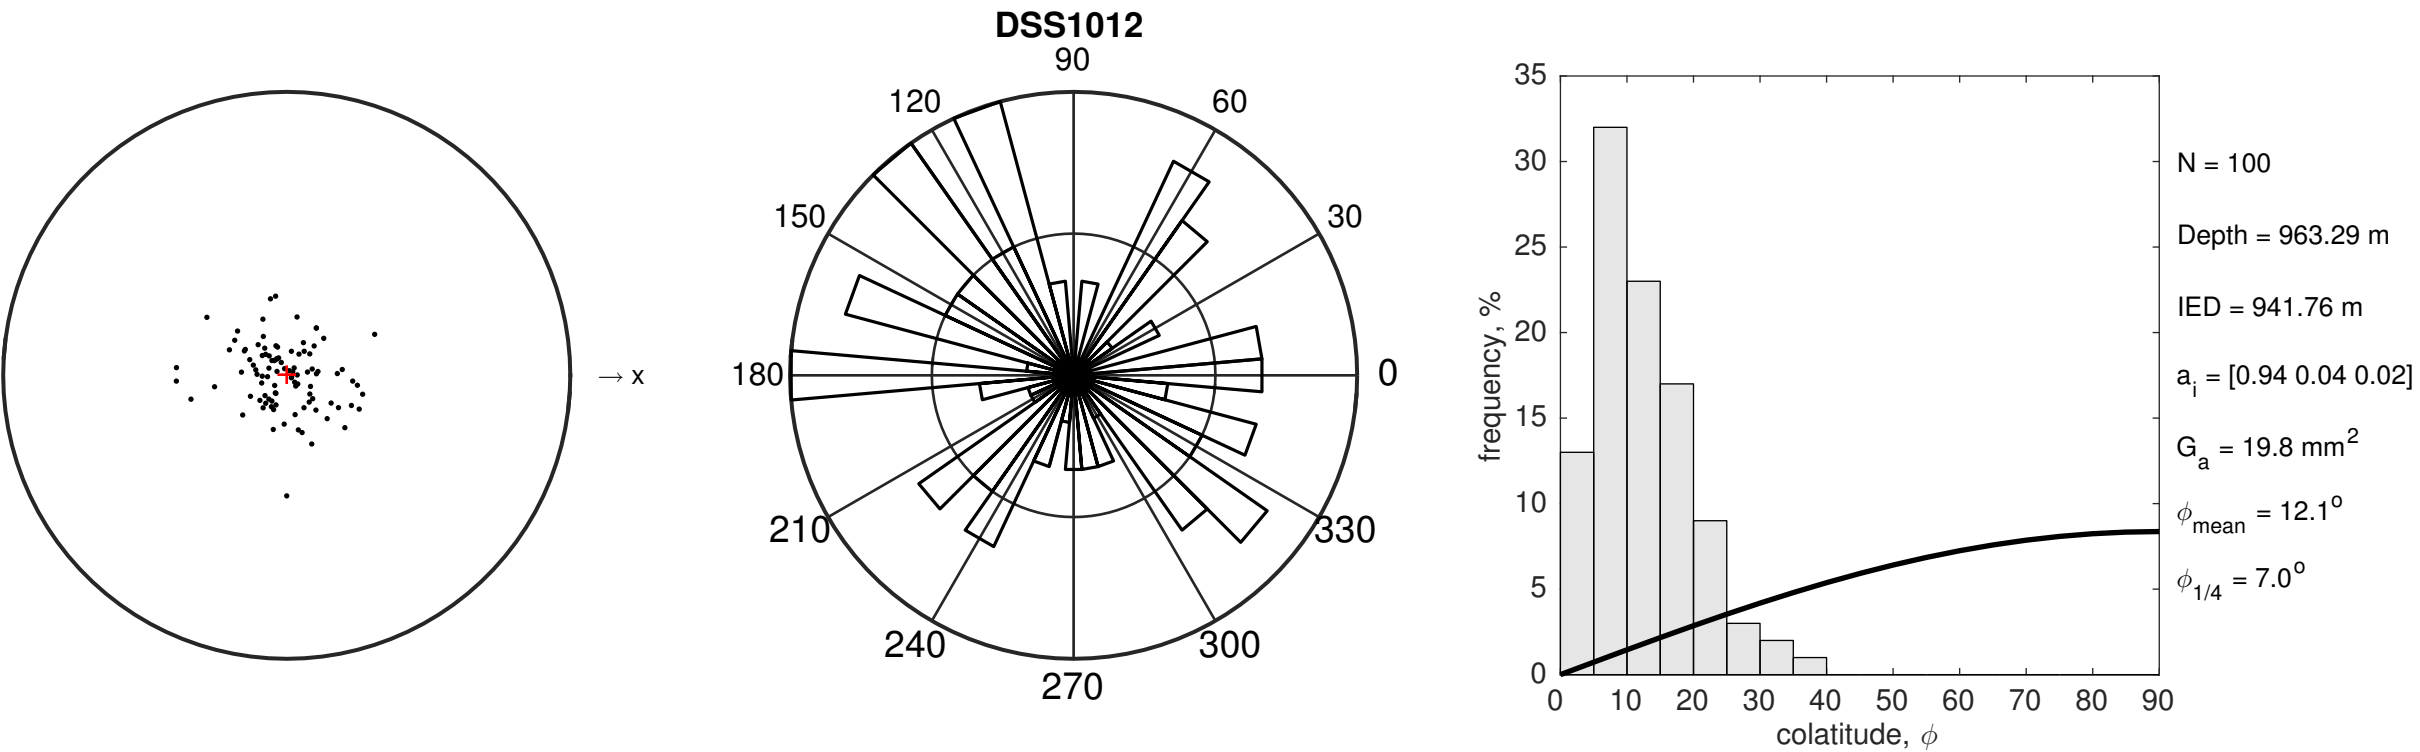

Supplement: Supplementary file 53 [file essd-2015-45-supplement.zip]

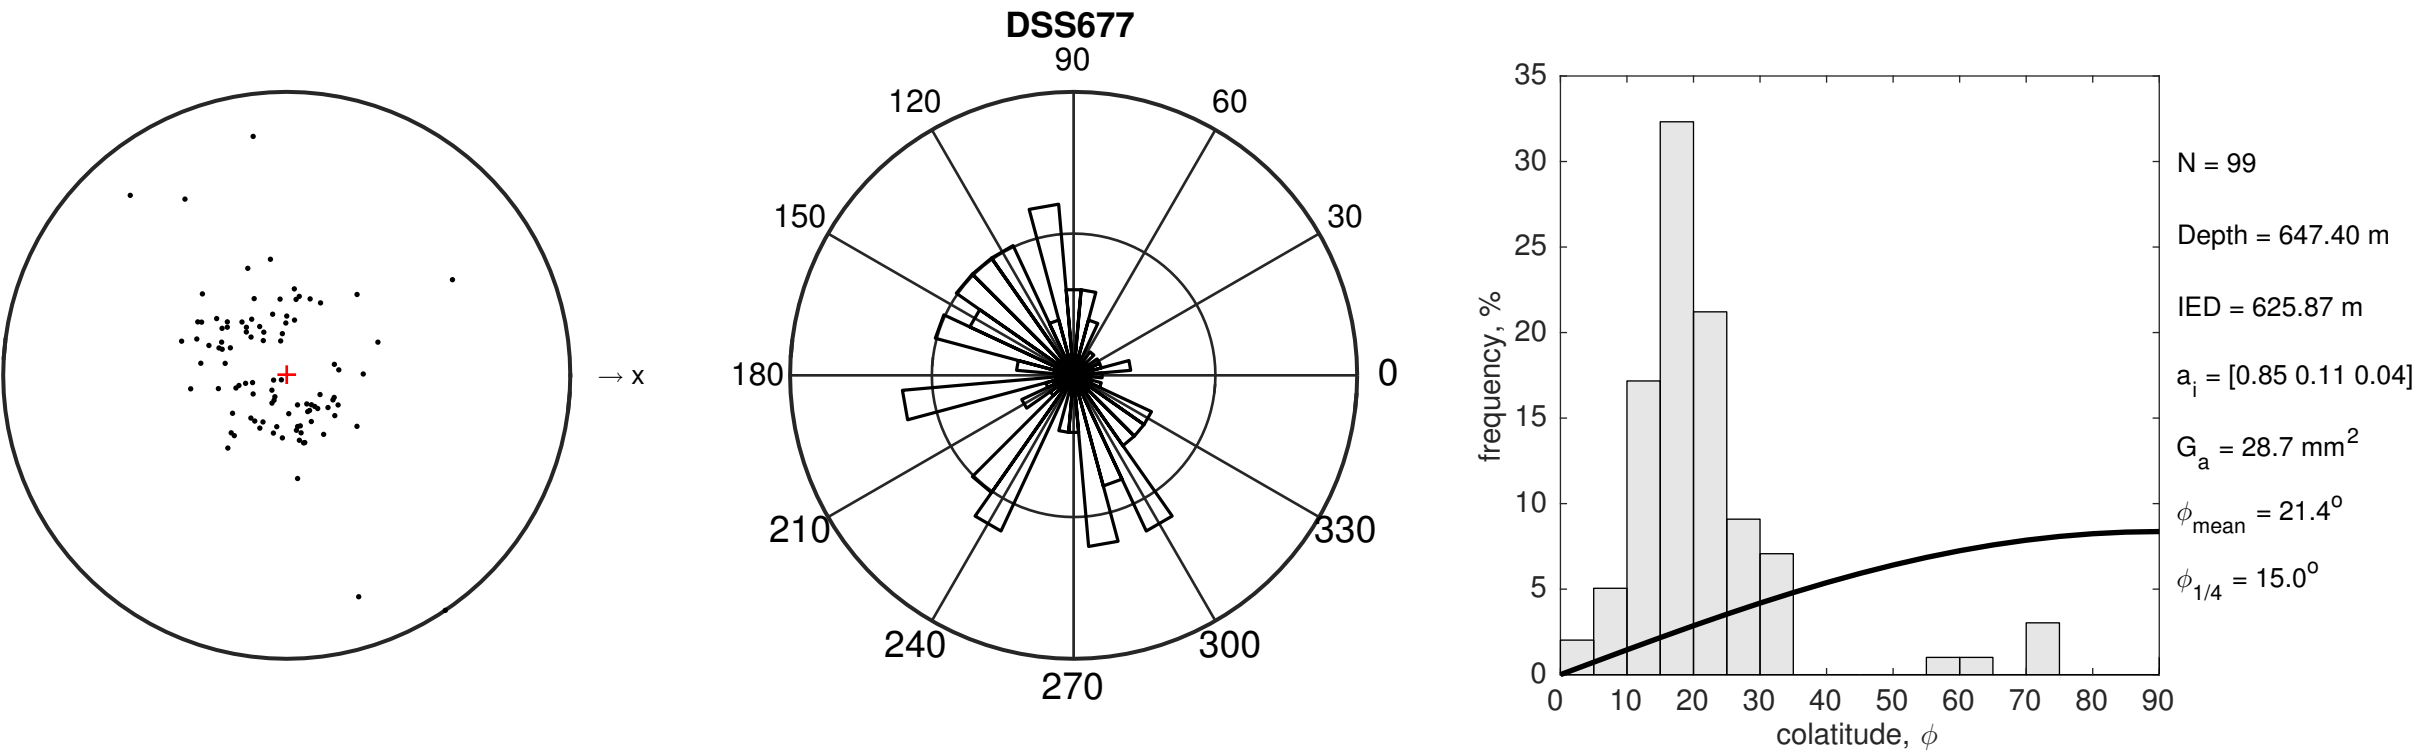

Supplement: Supplementary file 54 [file essd-2015-45-supplement.zip]

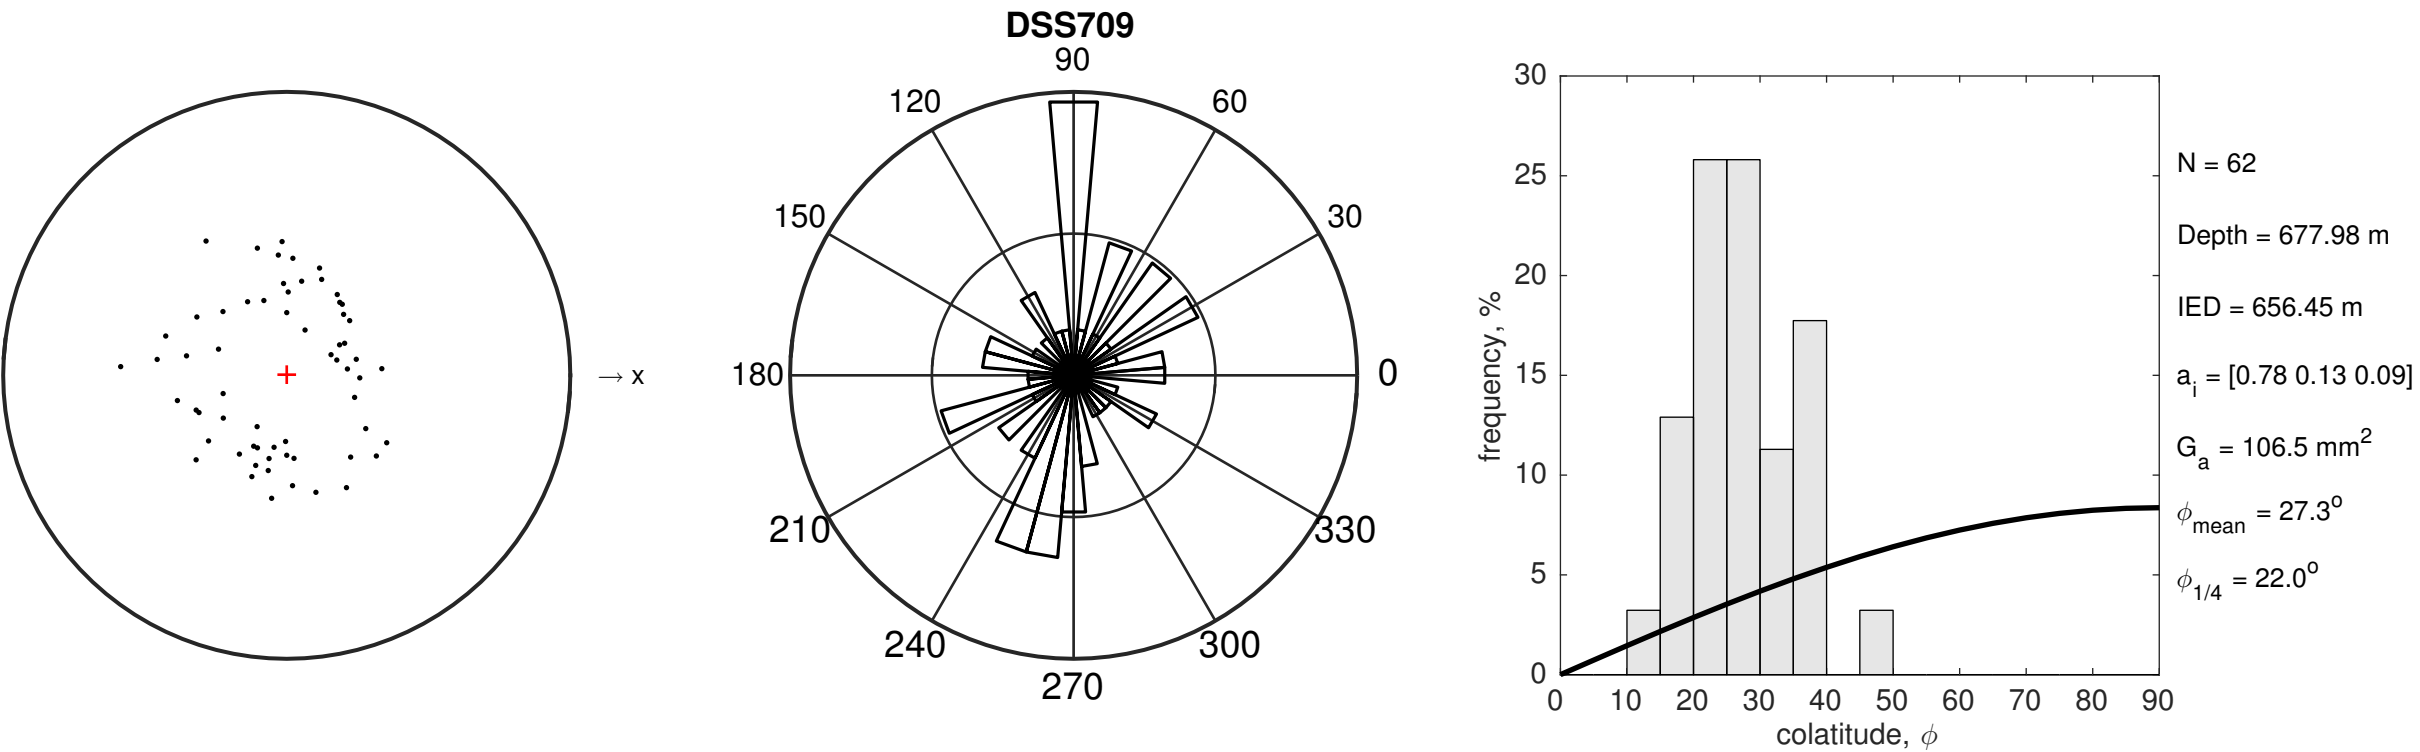

Supplement: Supplementary file 55 [file essd-2015-45-supplement.zip]

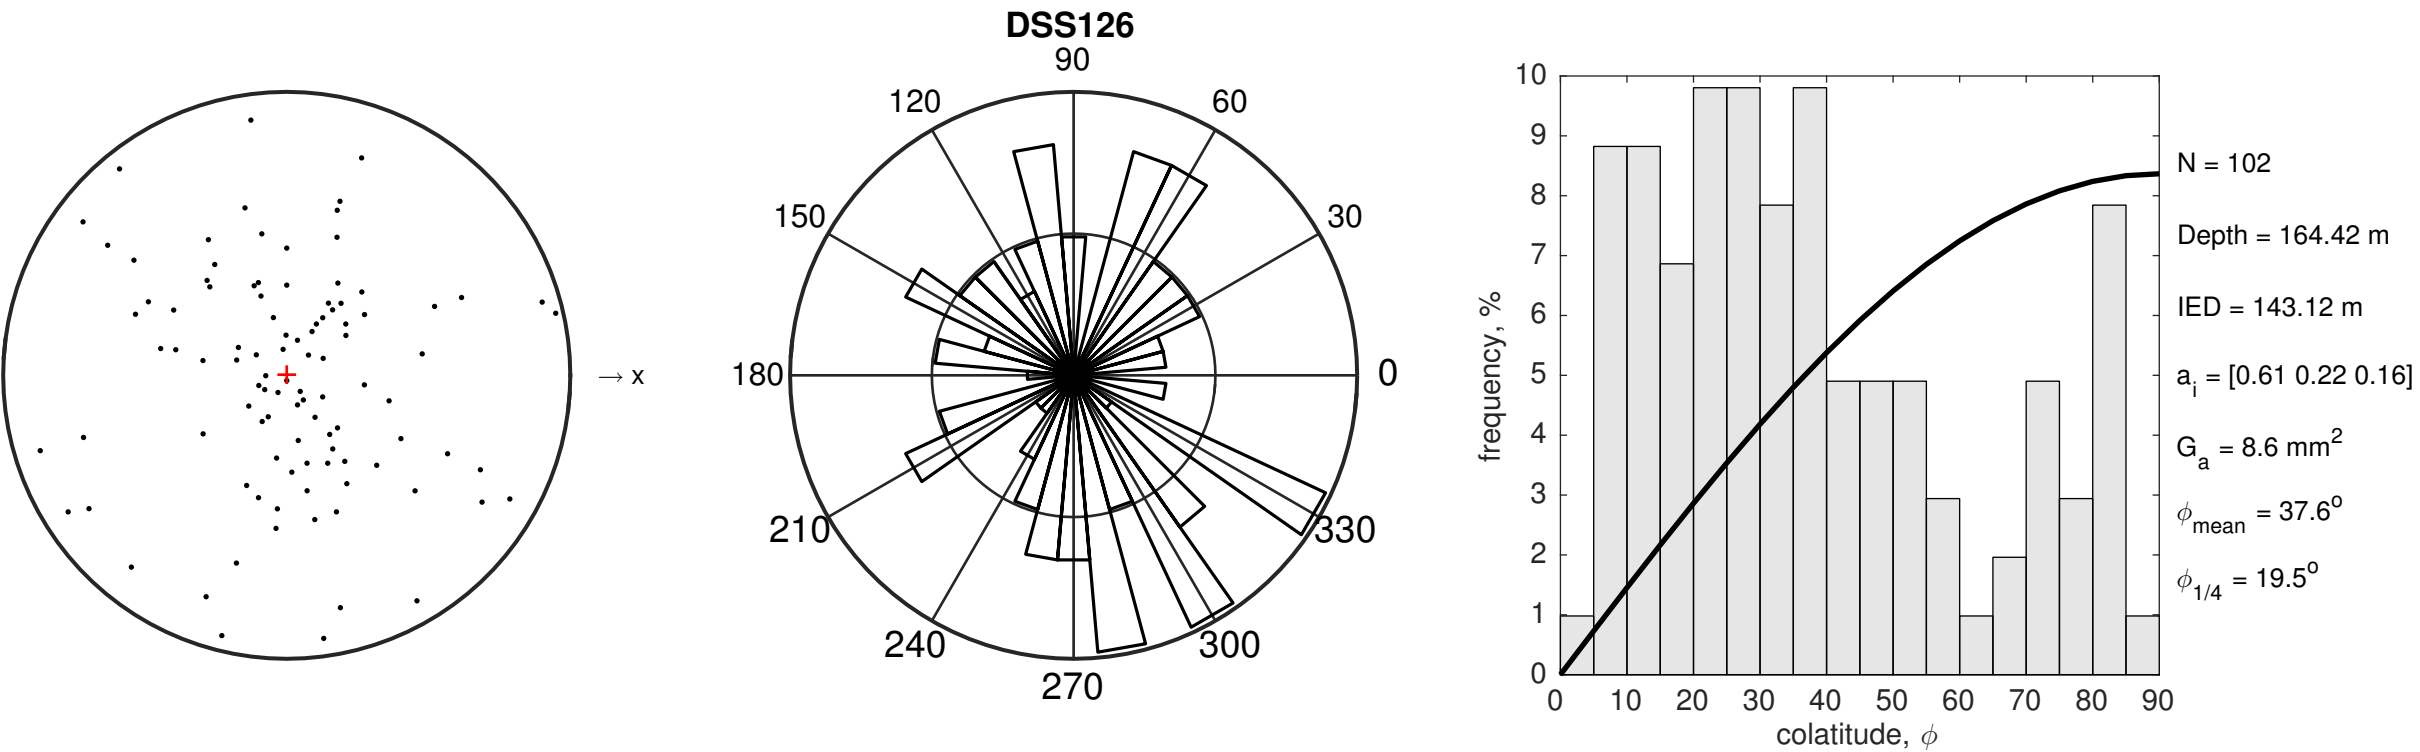

Supplement: Supplementary file 56 [file essd-2015-45-supplement.zip]

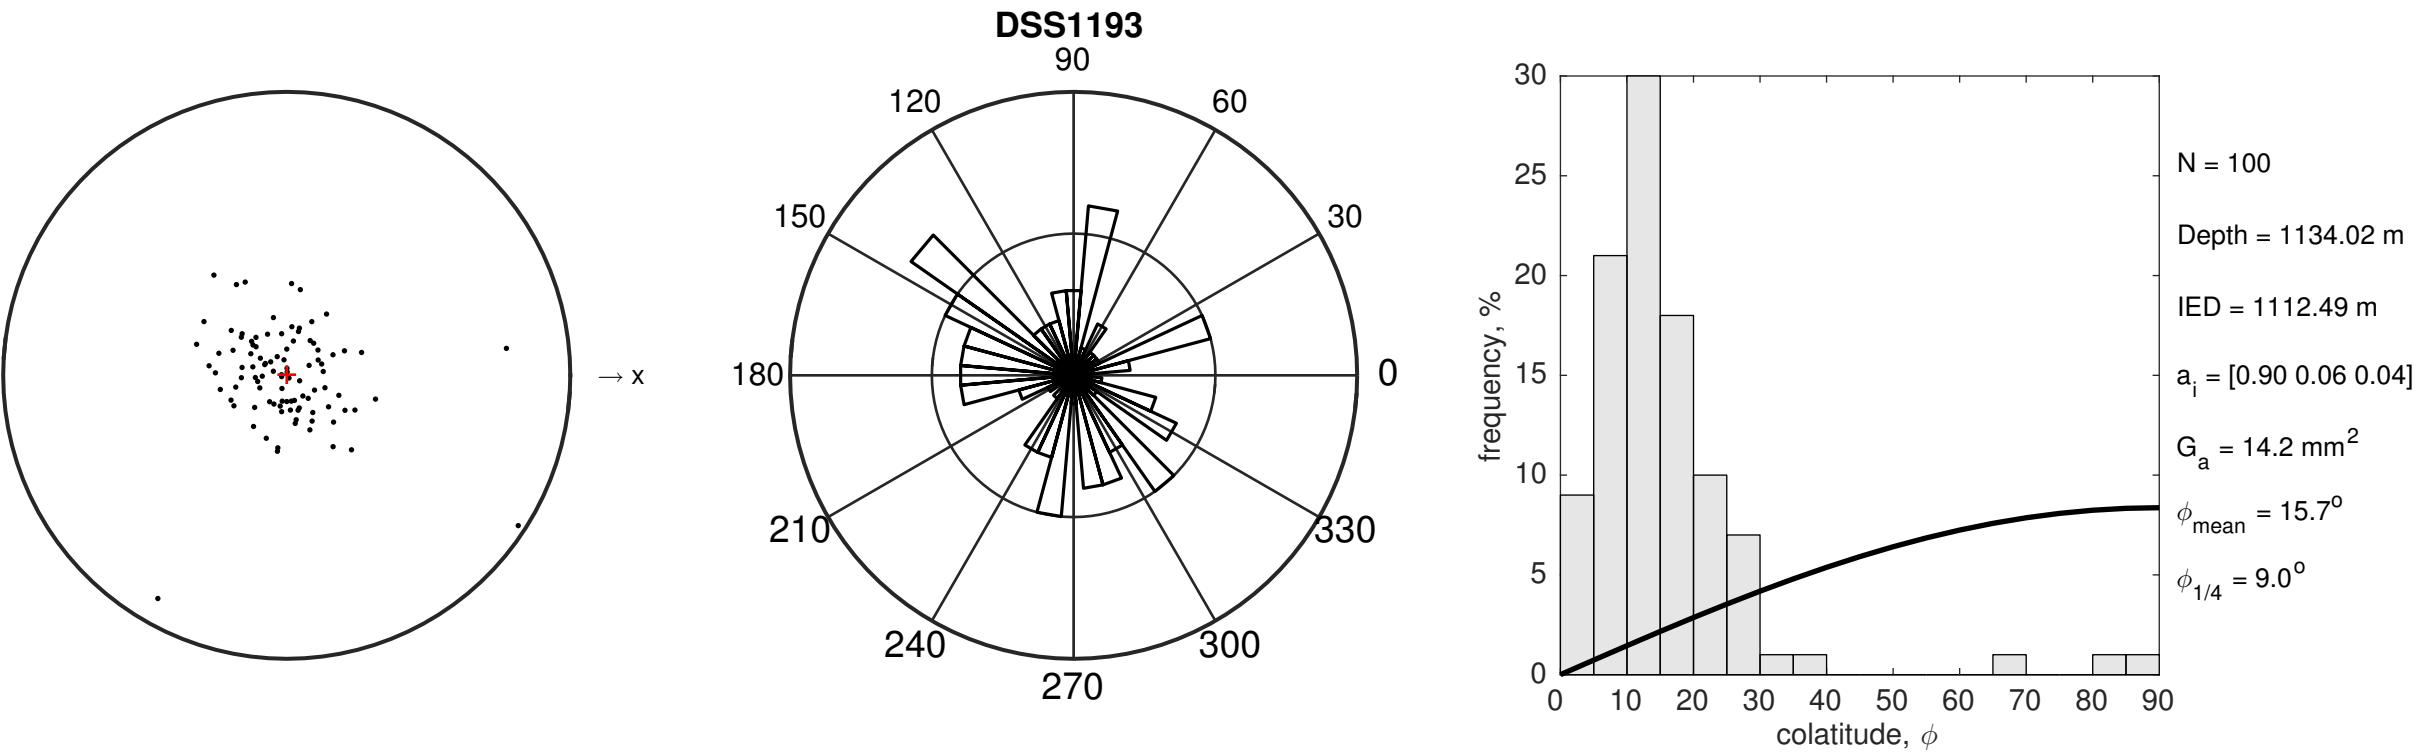

Supplement: Supplementary file 57 [file essd-2015-45-supplement.zip]

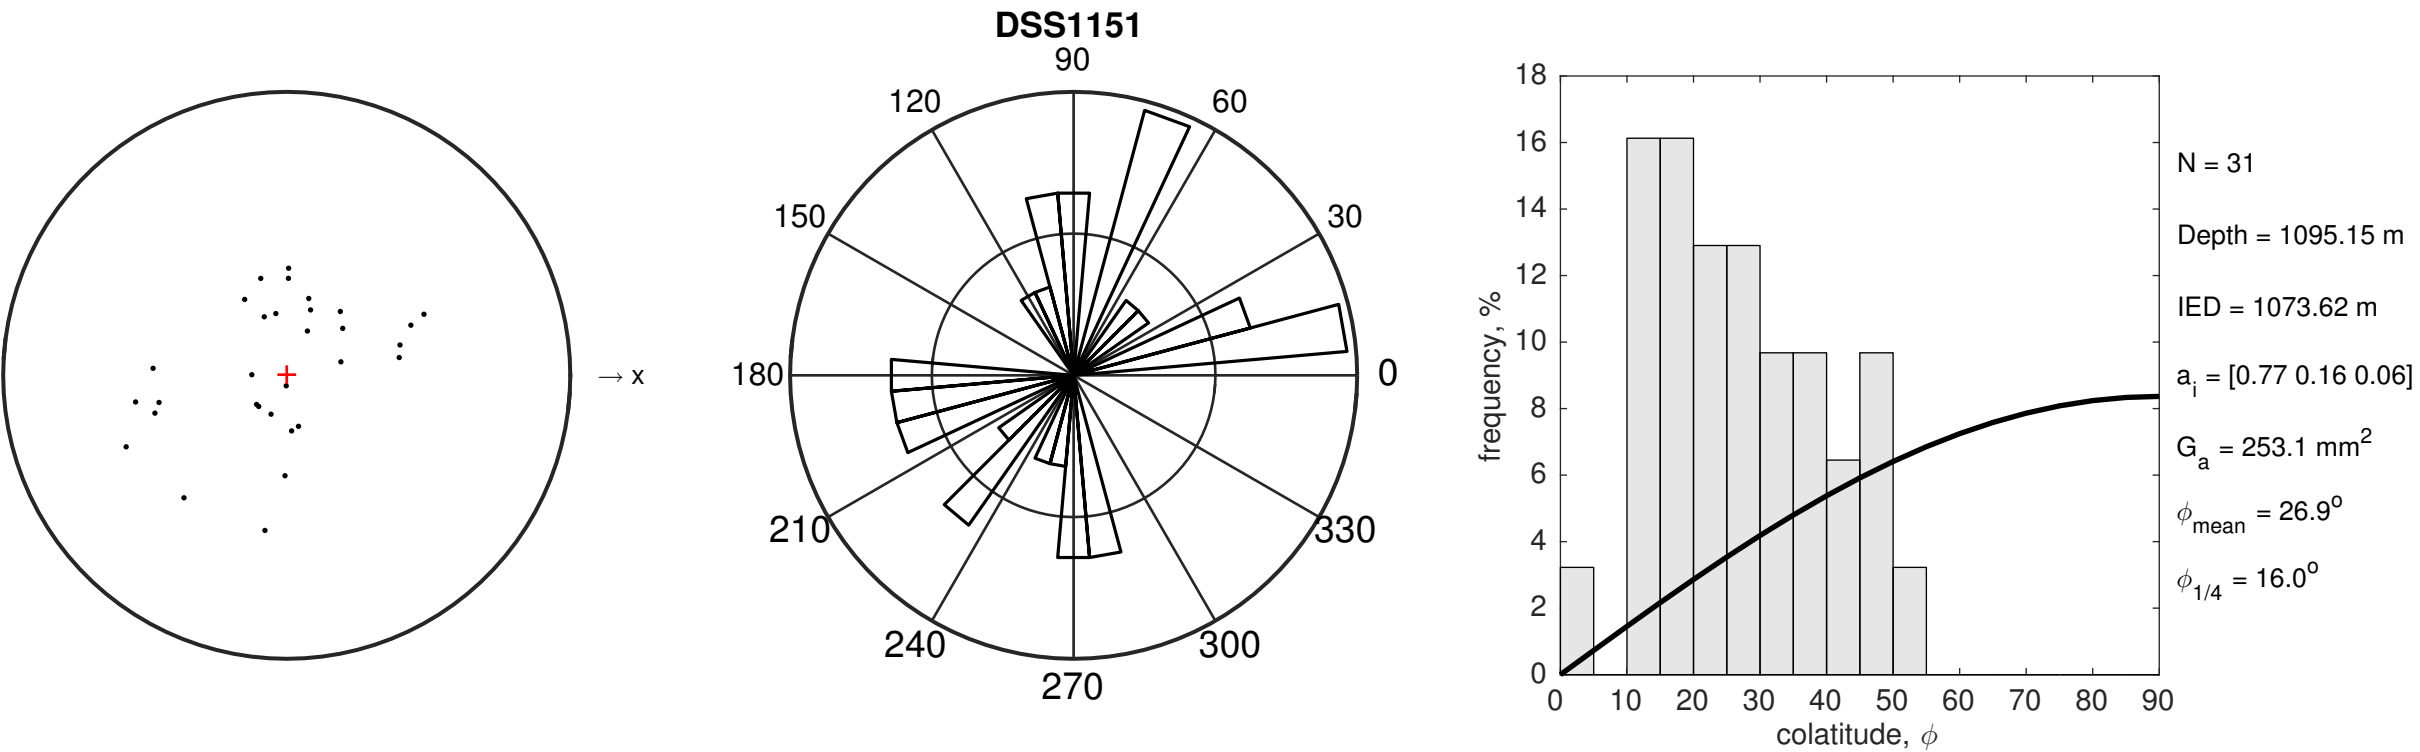

Supplement: Supplementary file 58 [file essd-2015-45-supplement.zip]

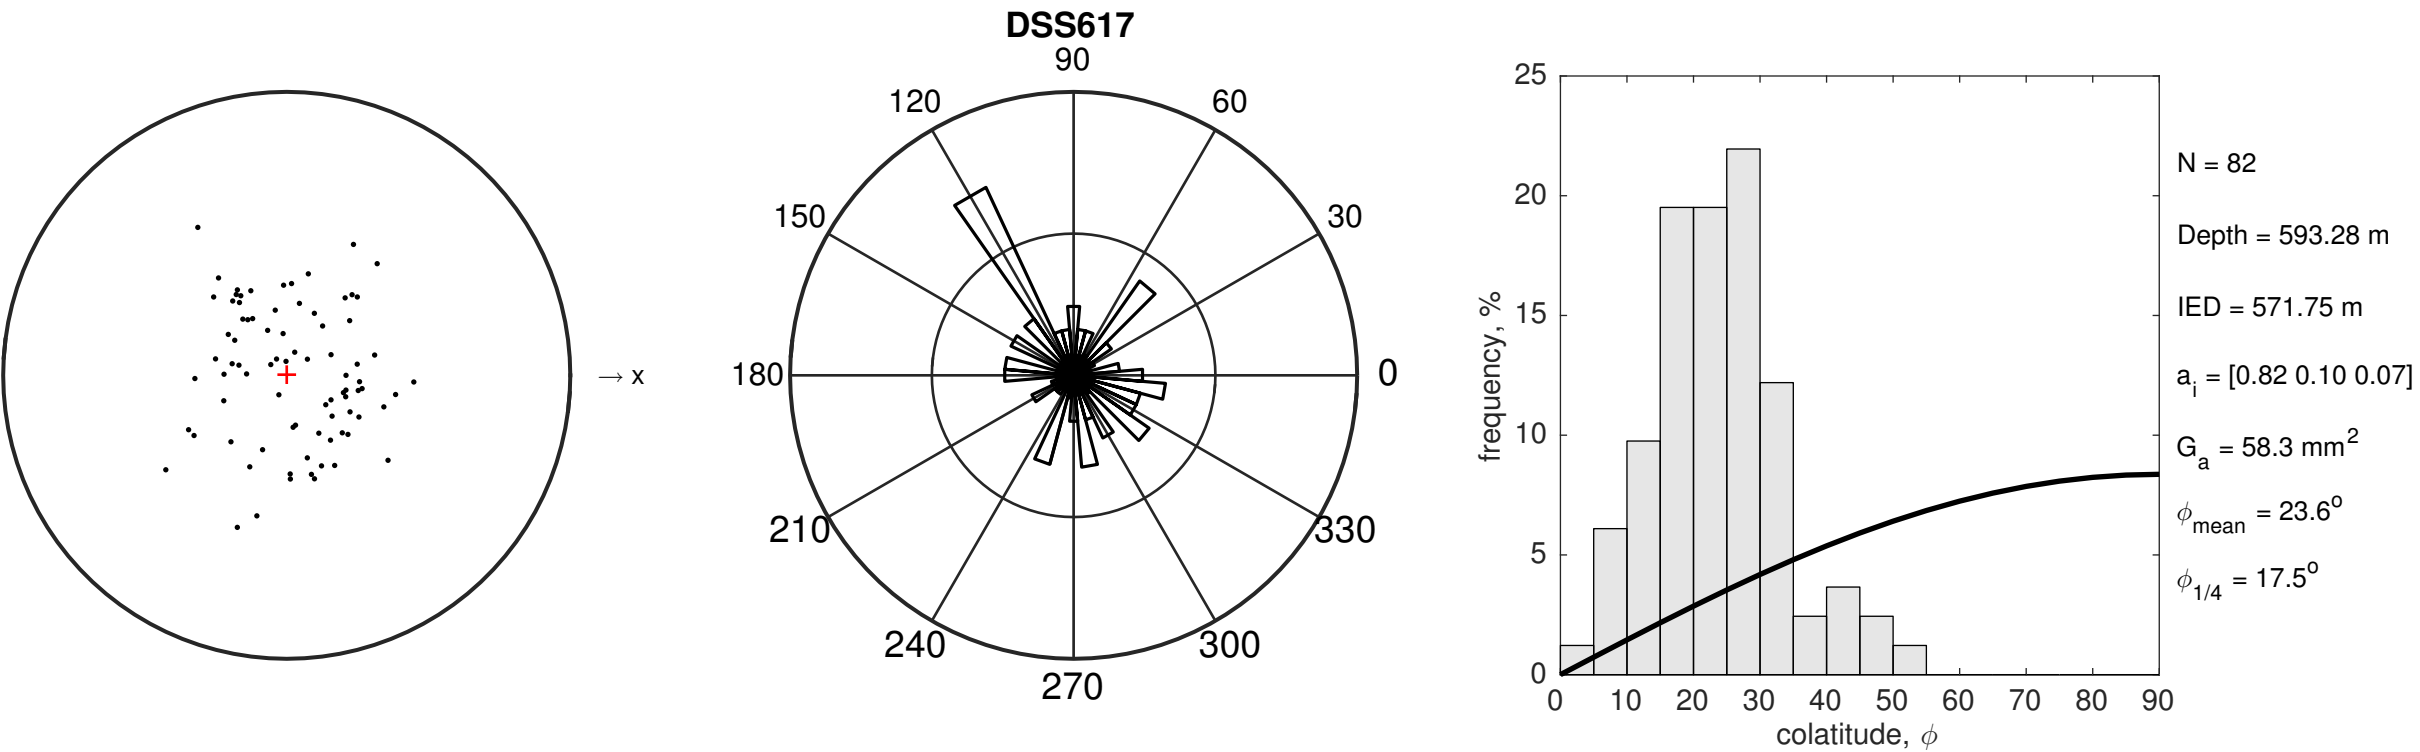

Supplement: Supplementary file 59 [file essd-2015-45-supplement.zip]

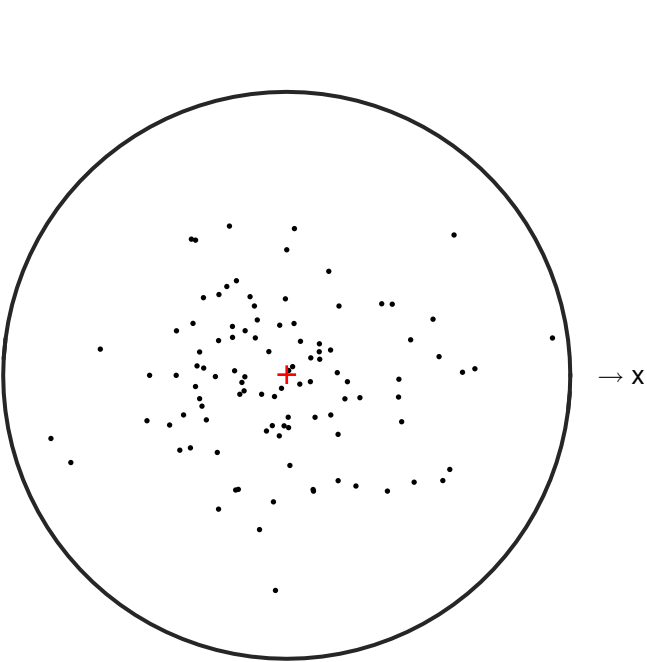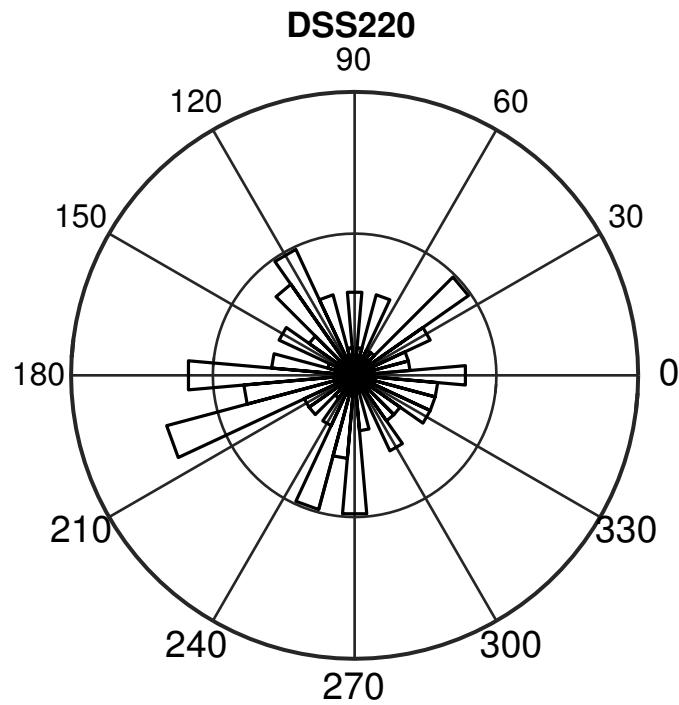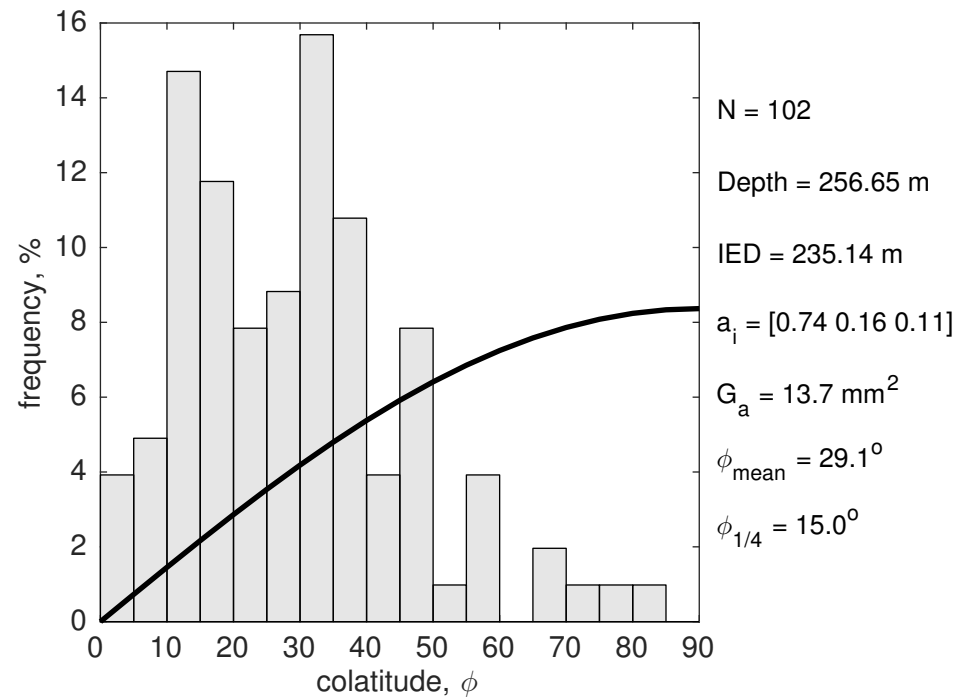

Supplement: Supplementary file 60 [file essd-2015-45-supplement.zip]

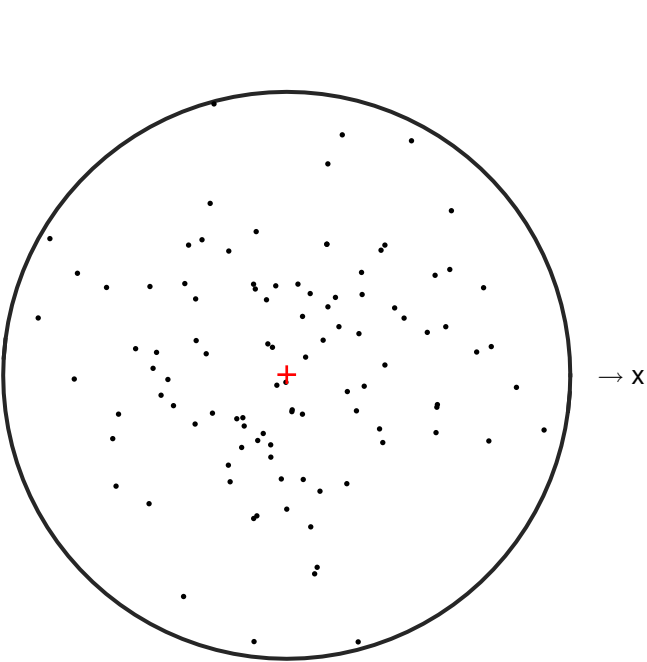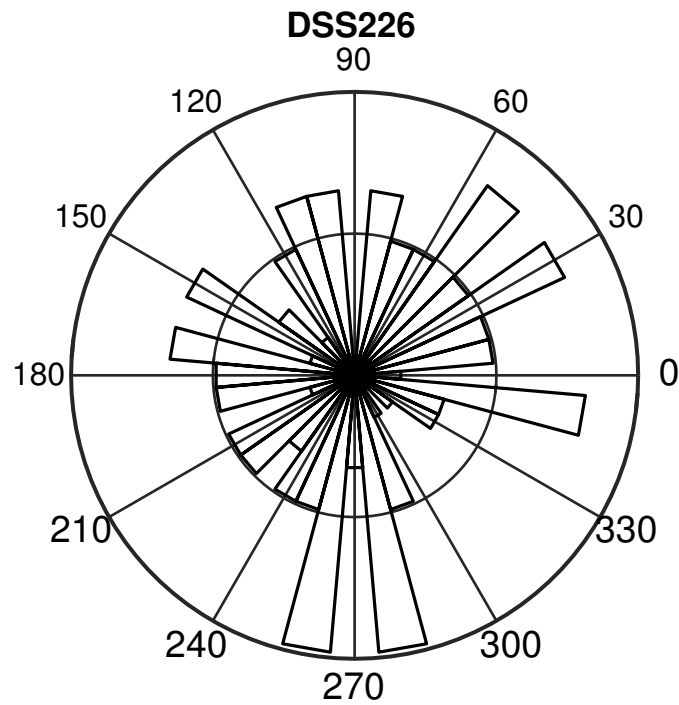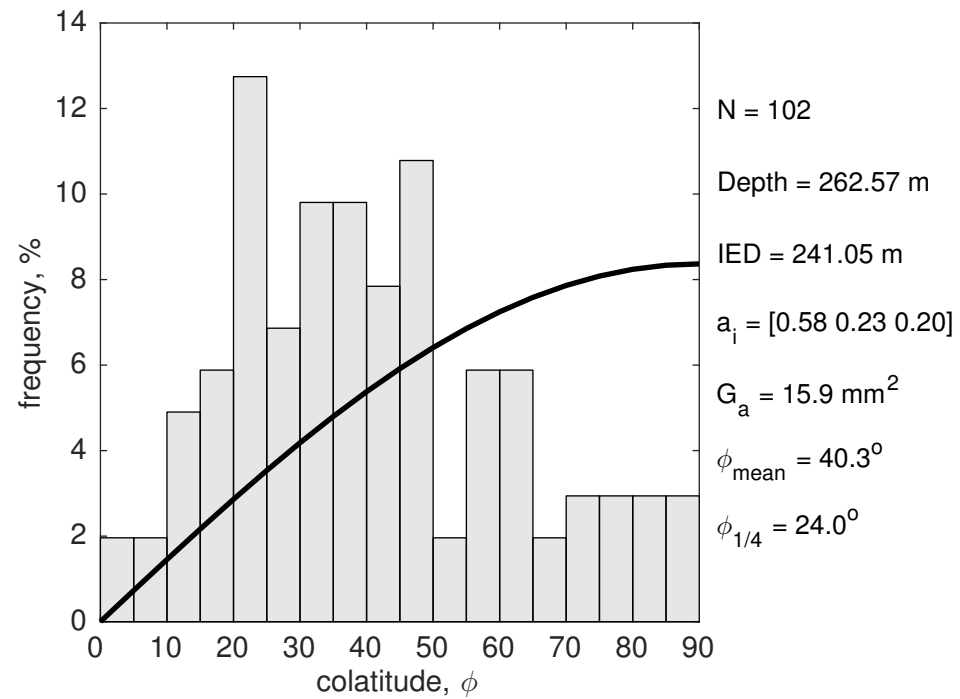

Supplement: Supplementary file 61 [file essd-2015-45-supplement.zip]

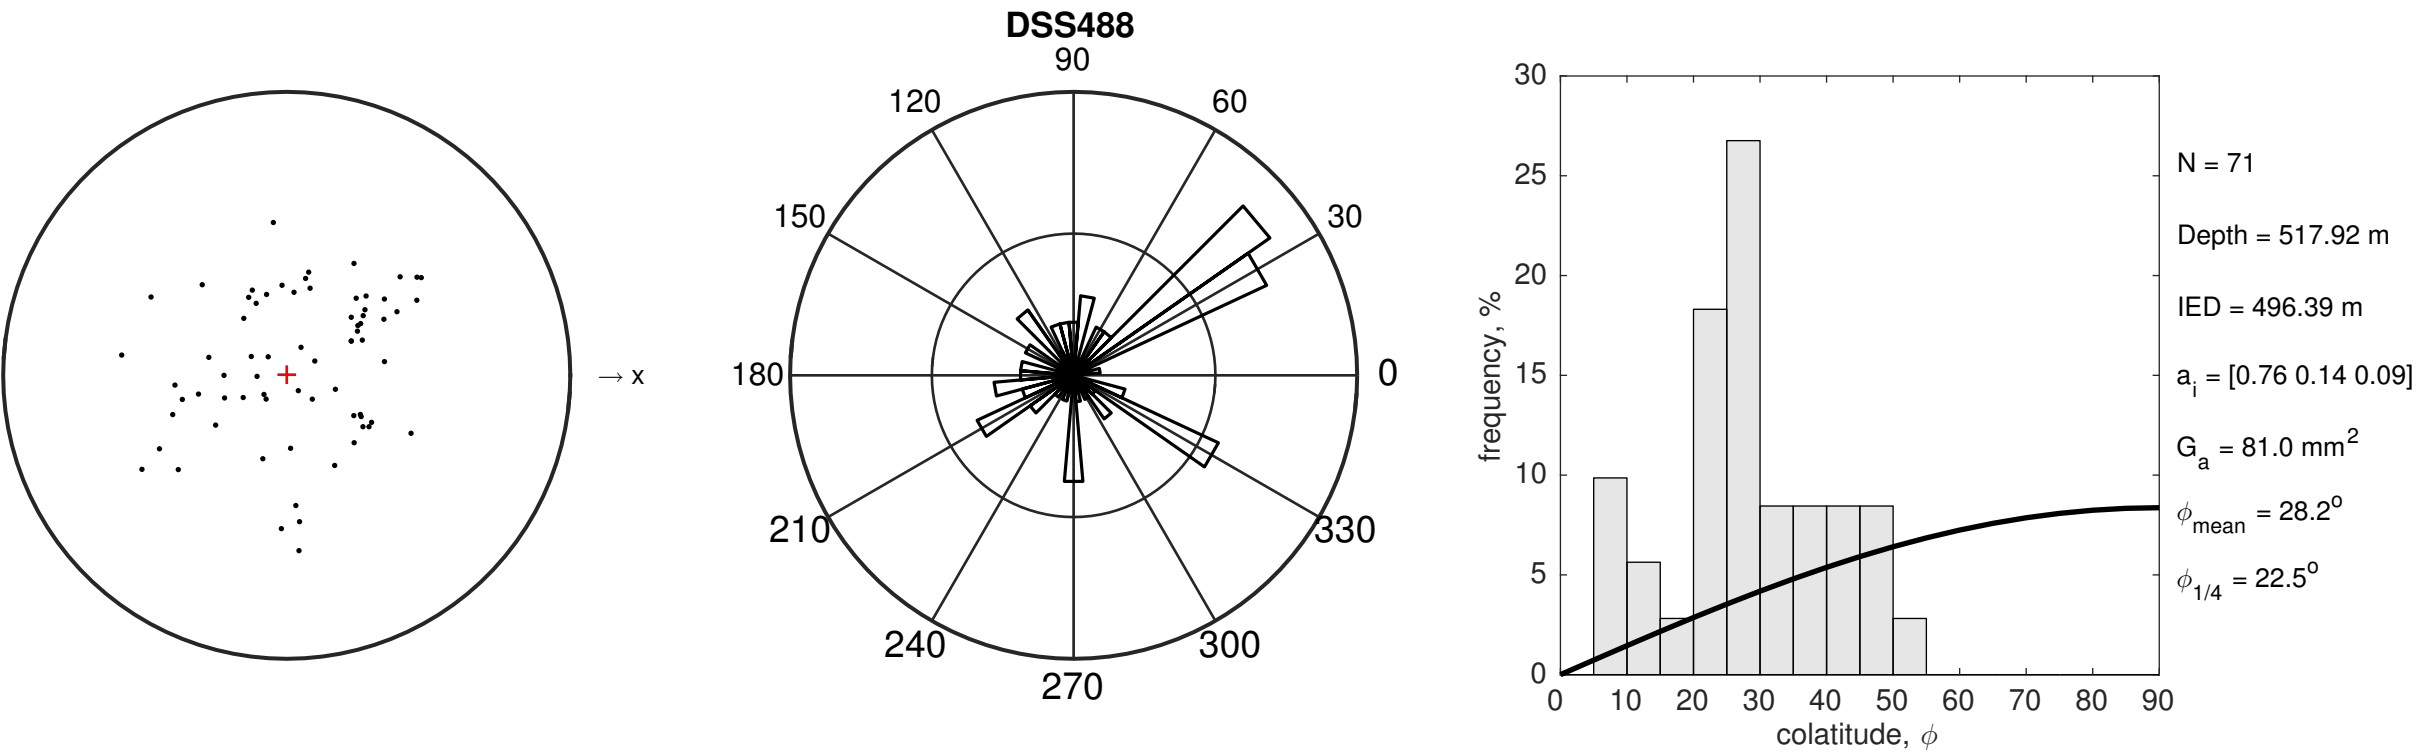

Supplement: Supplementary file 62 [file essd-2015-45-supplement.zip]

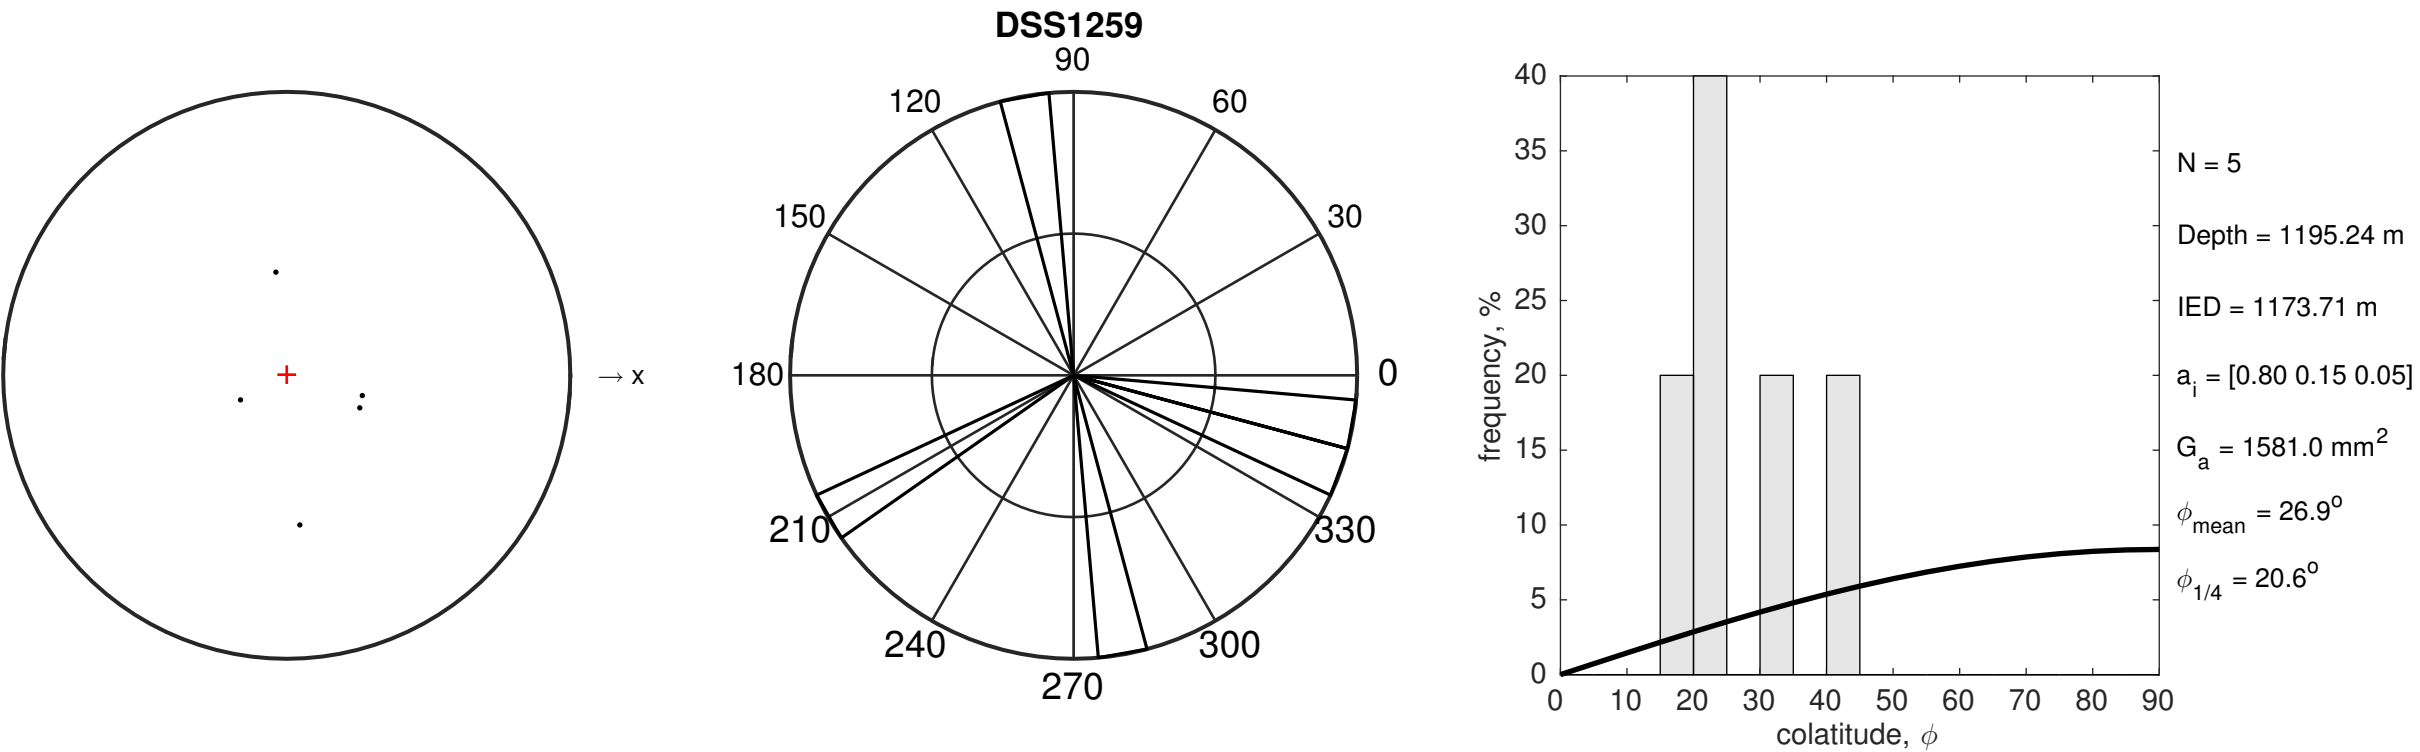

Supplement: Supplementary file 63 [file essd-2015-45-supplement.zip]

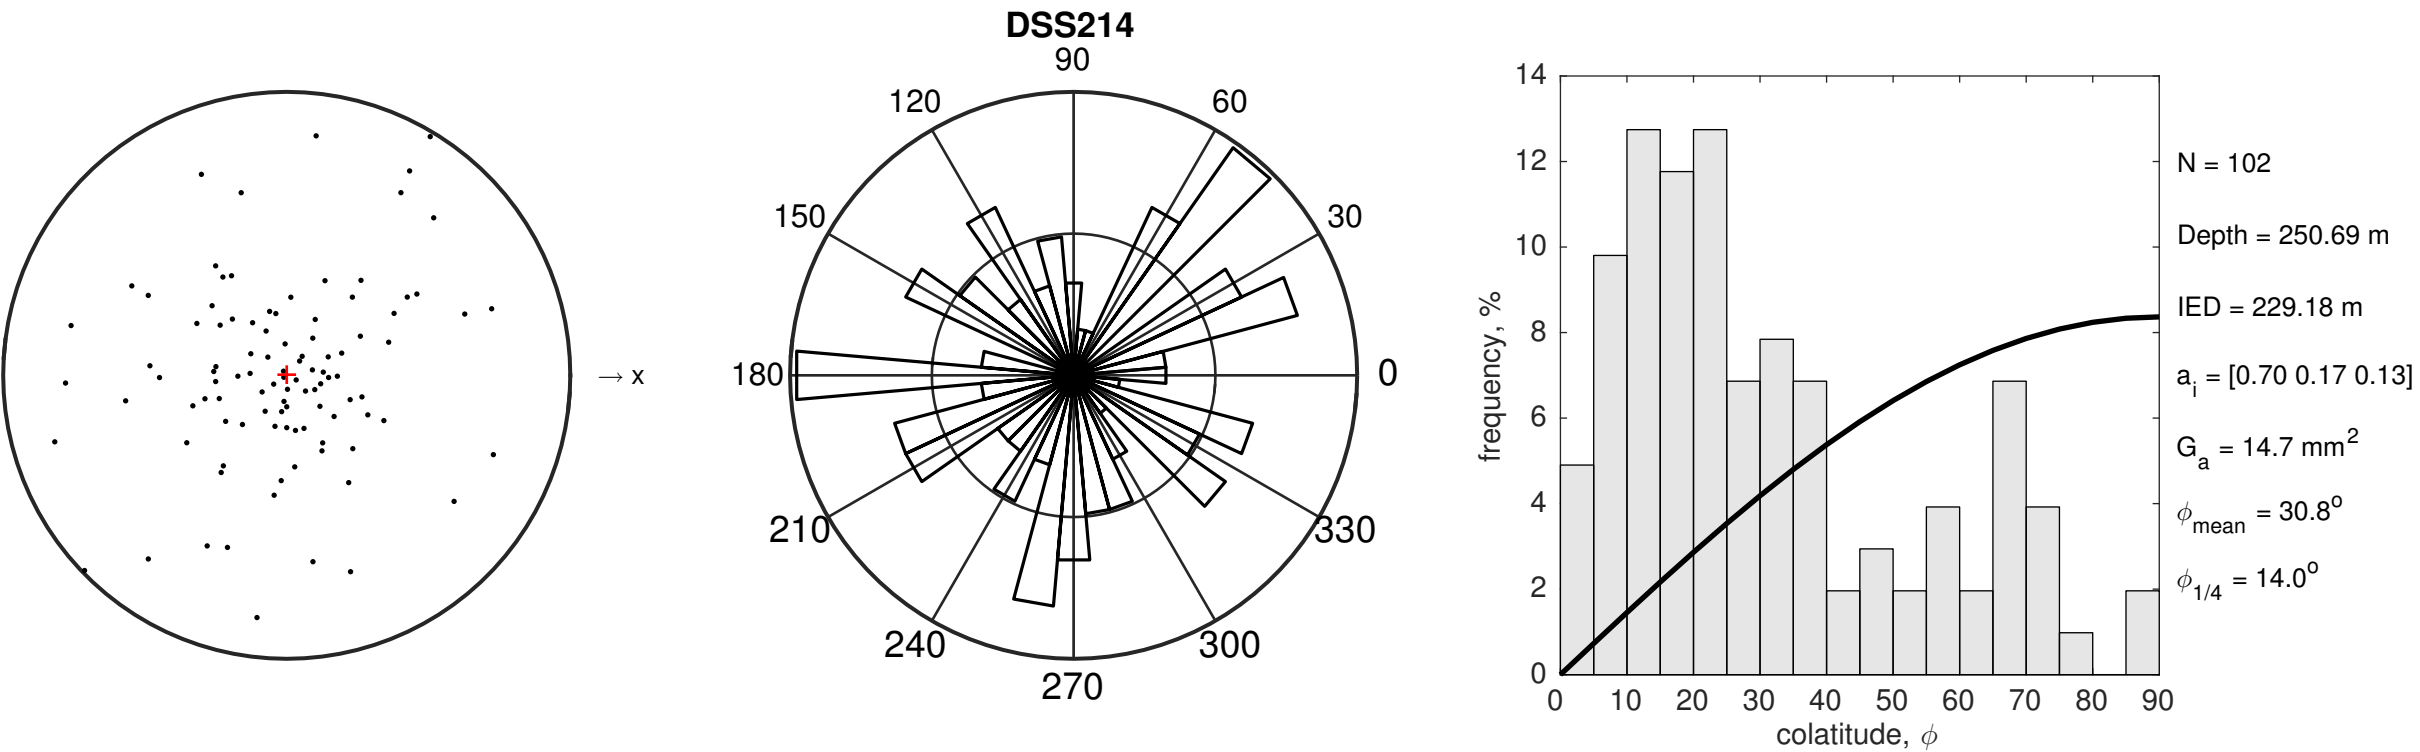

Supplement: Supplementary file 64 [file essd-2015-45-supplement.zip]

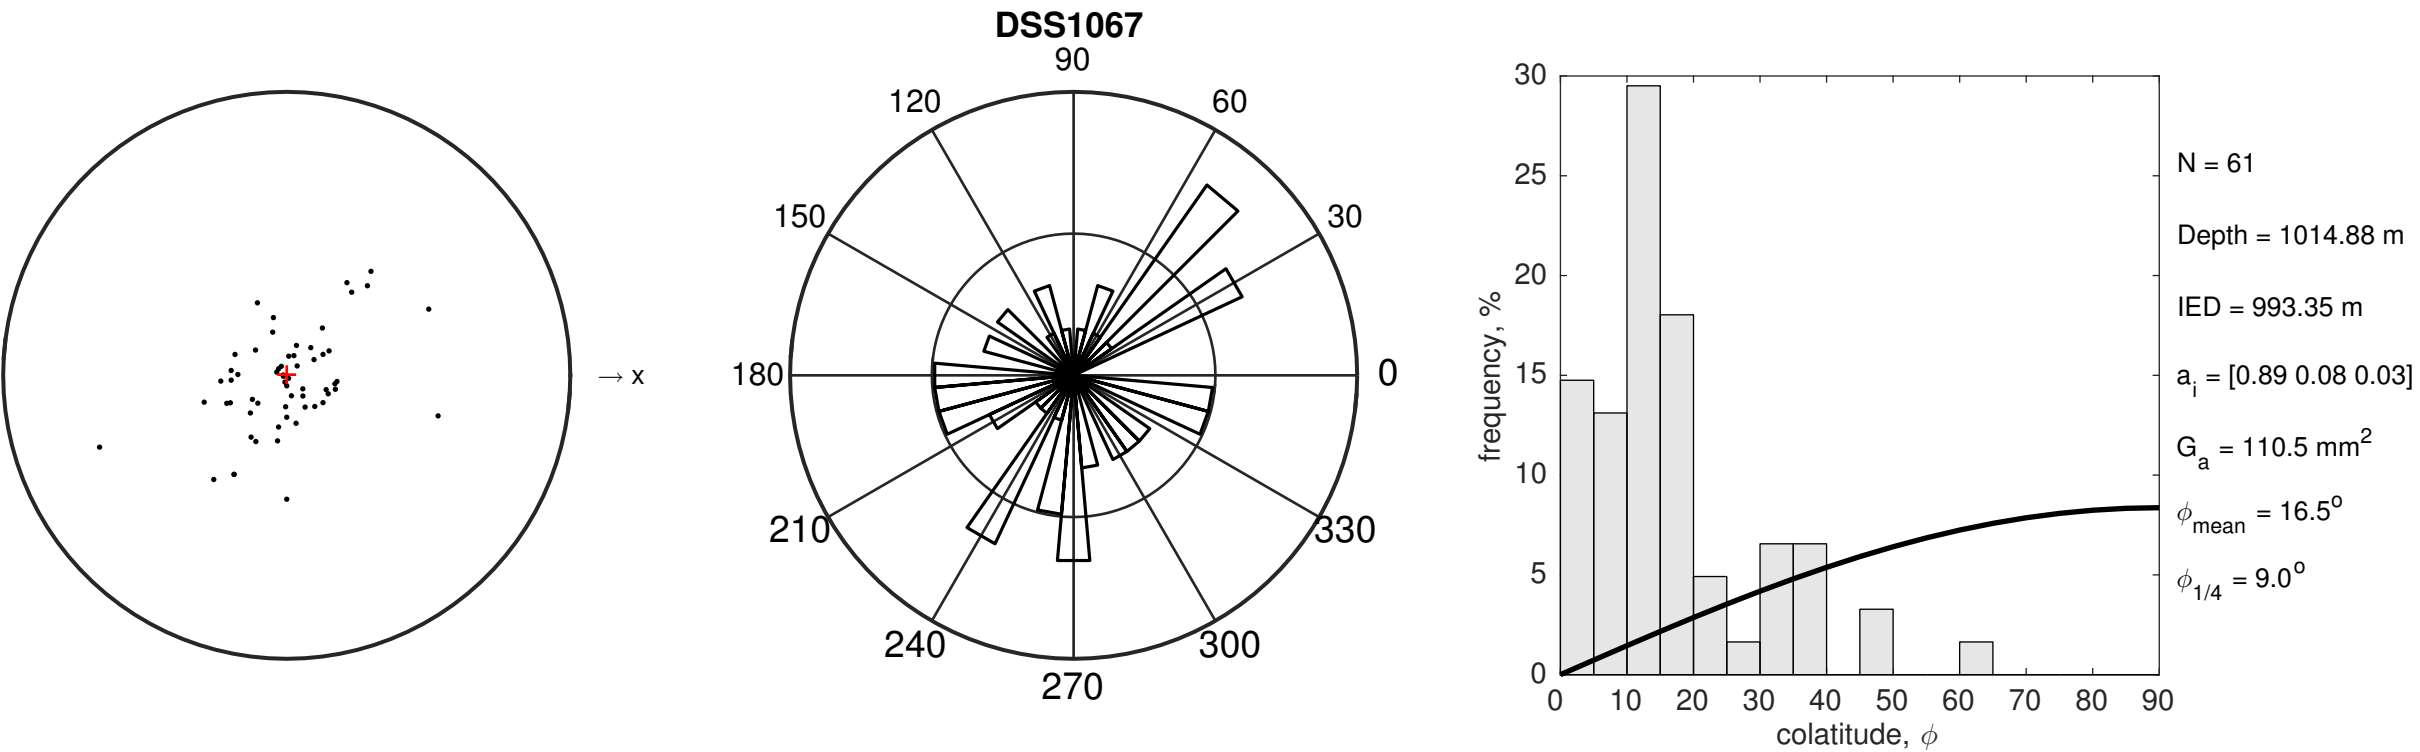

Supplement: Supplementary file 65 [file essd-2015-45-supplement.zip]

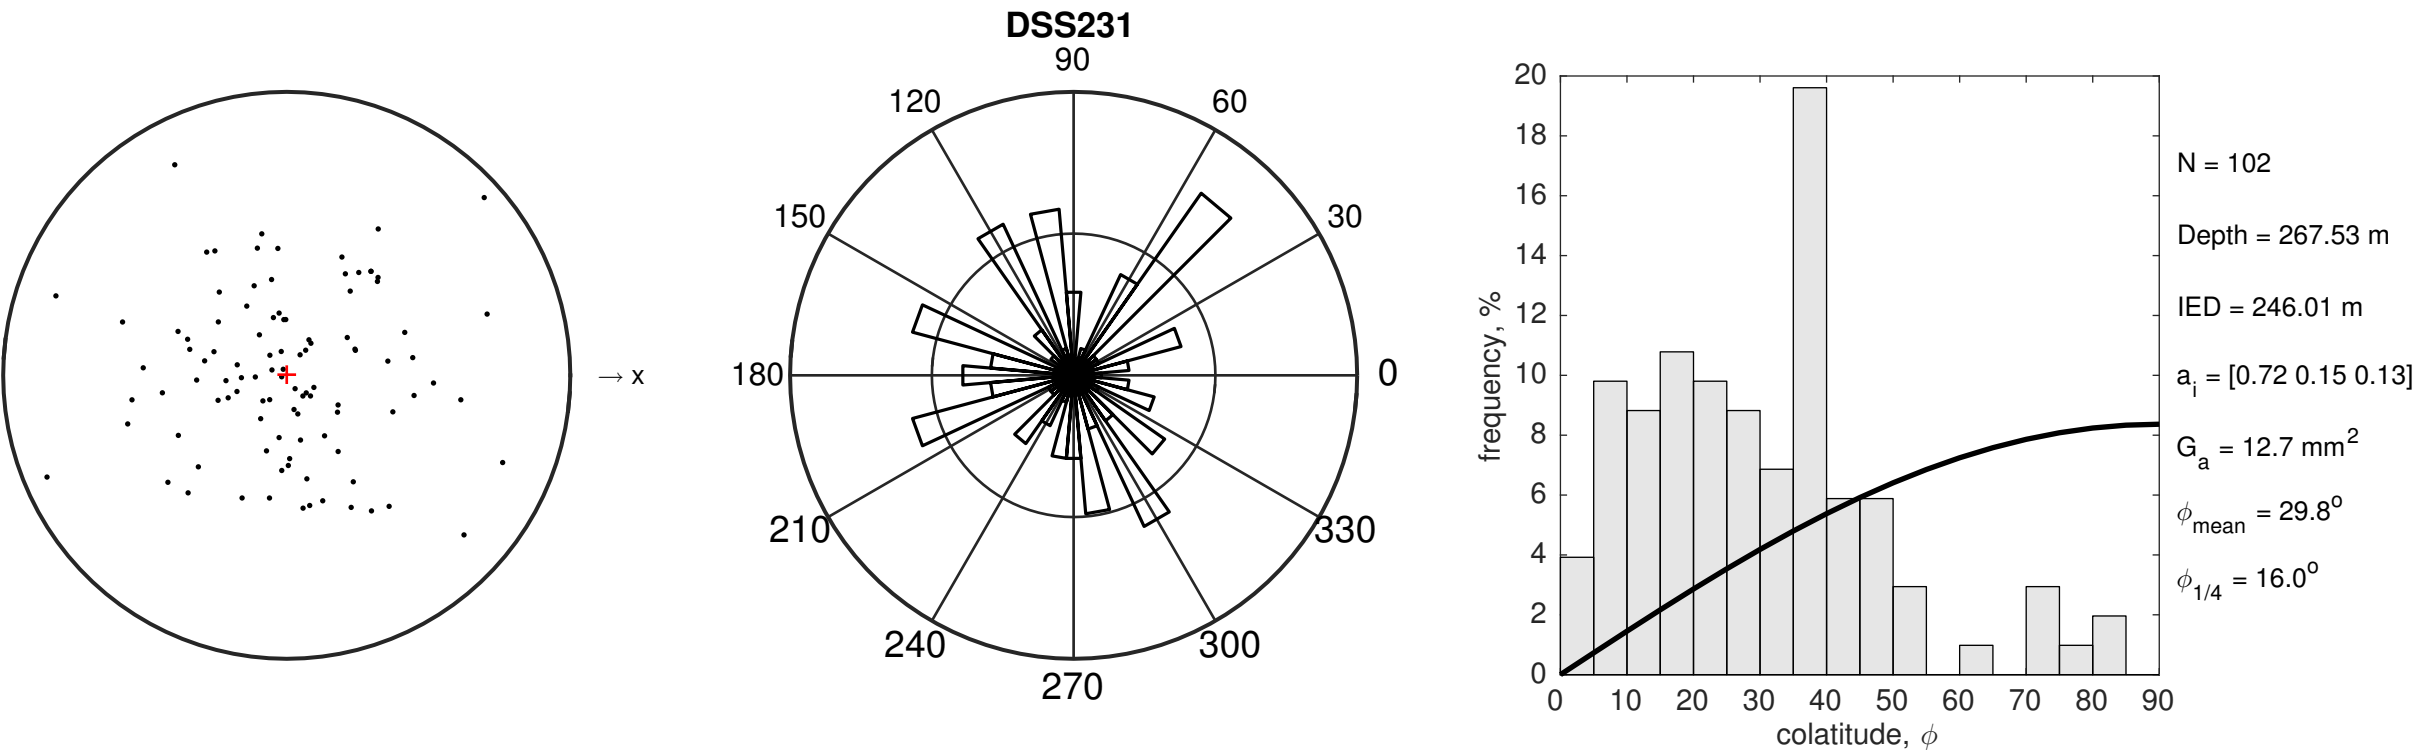

Supplement: Supplementary file 66 [file essd-2015-45-supplement.zip]

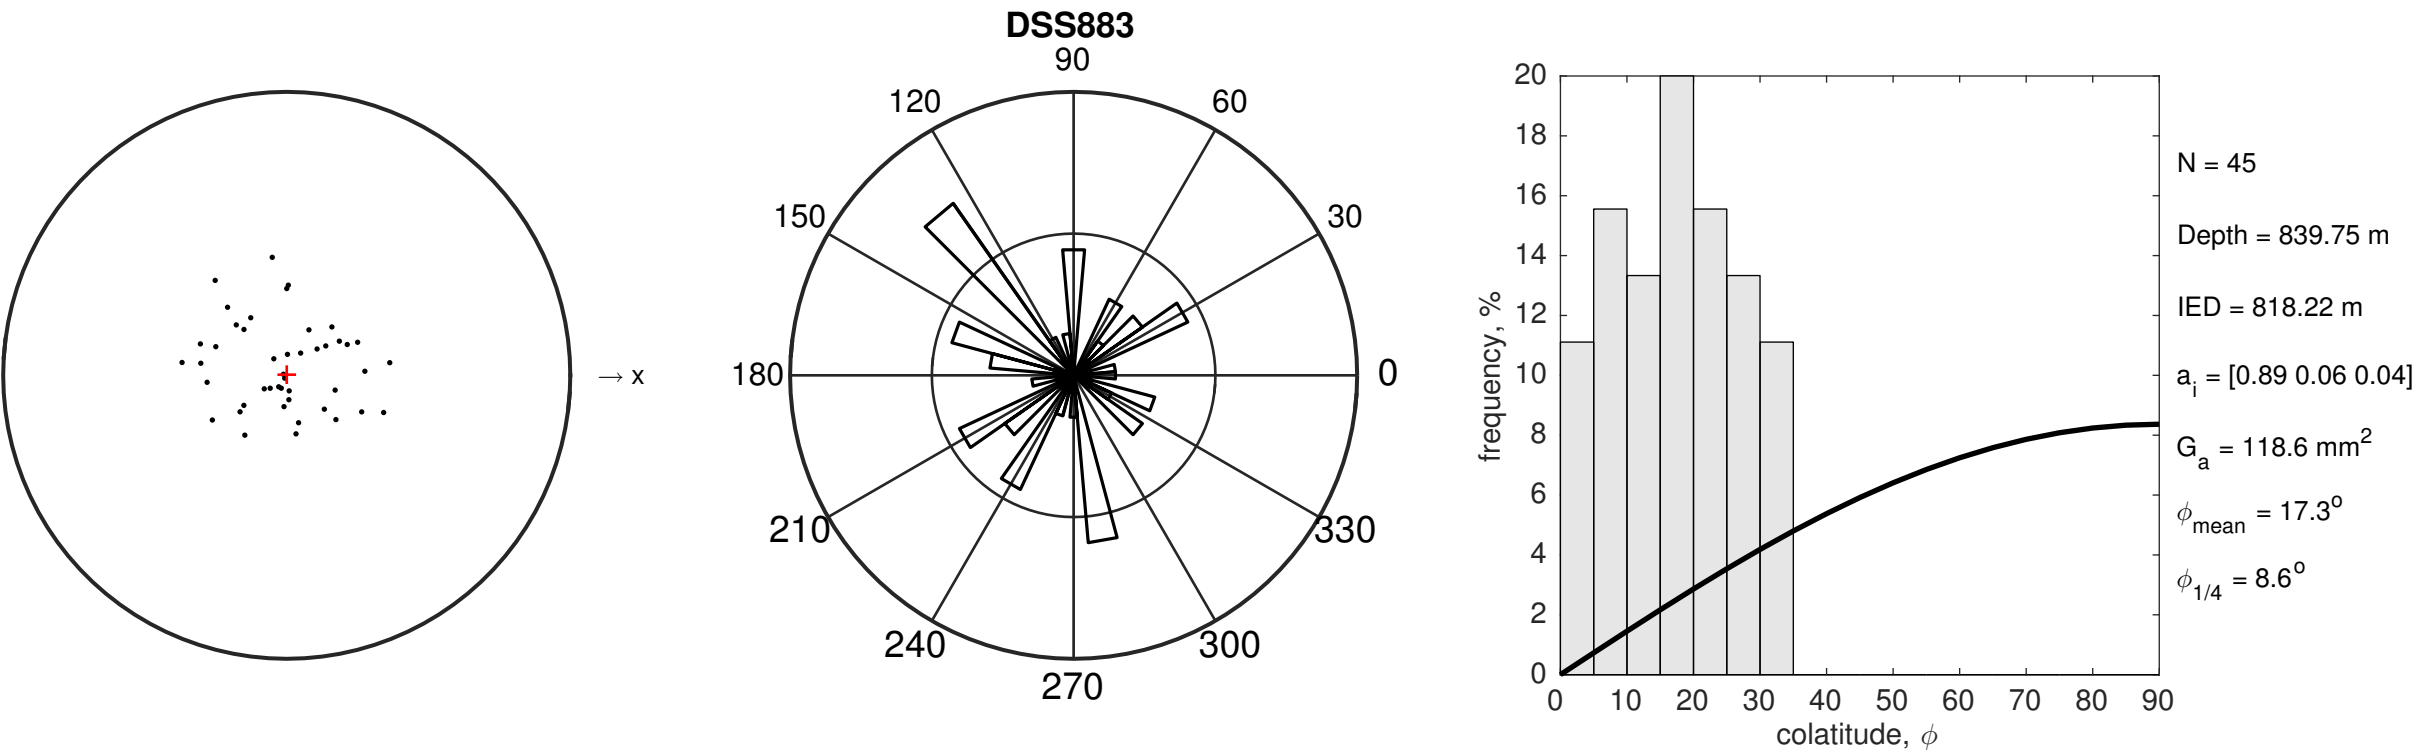

Supplement: Supplementary file 67 [file essd-2015-45-supplement.zip]

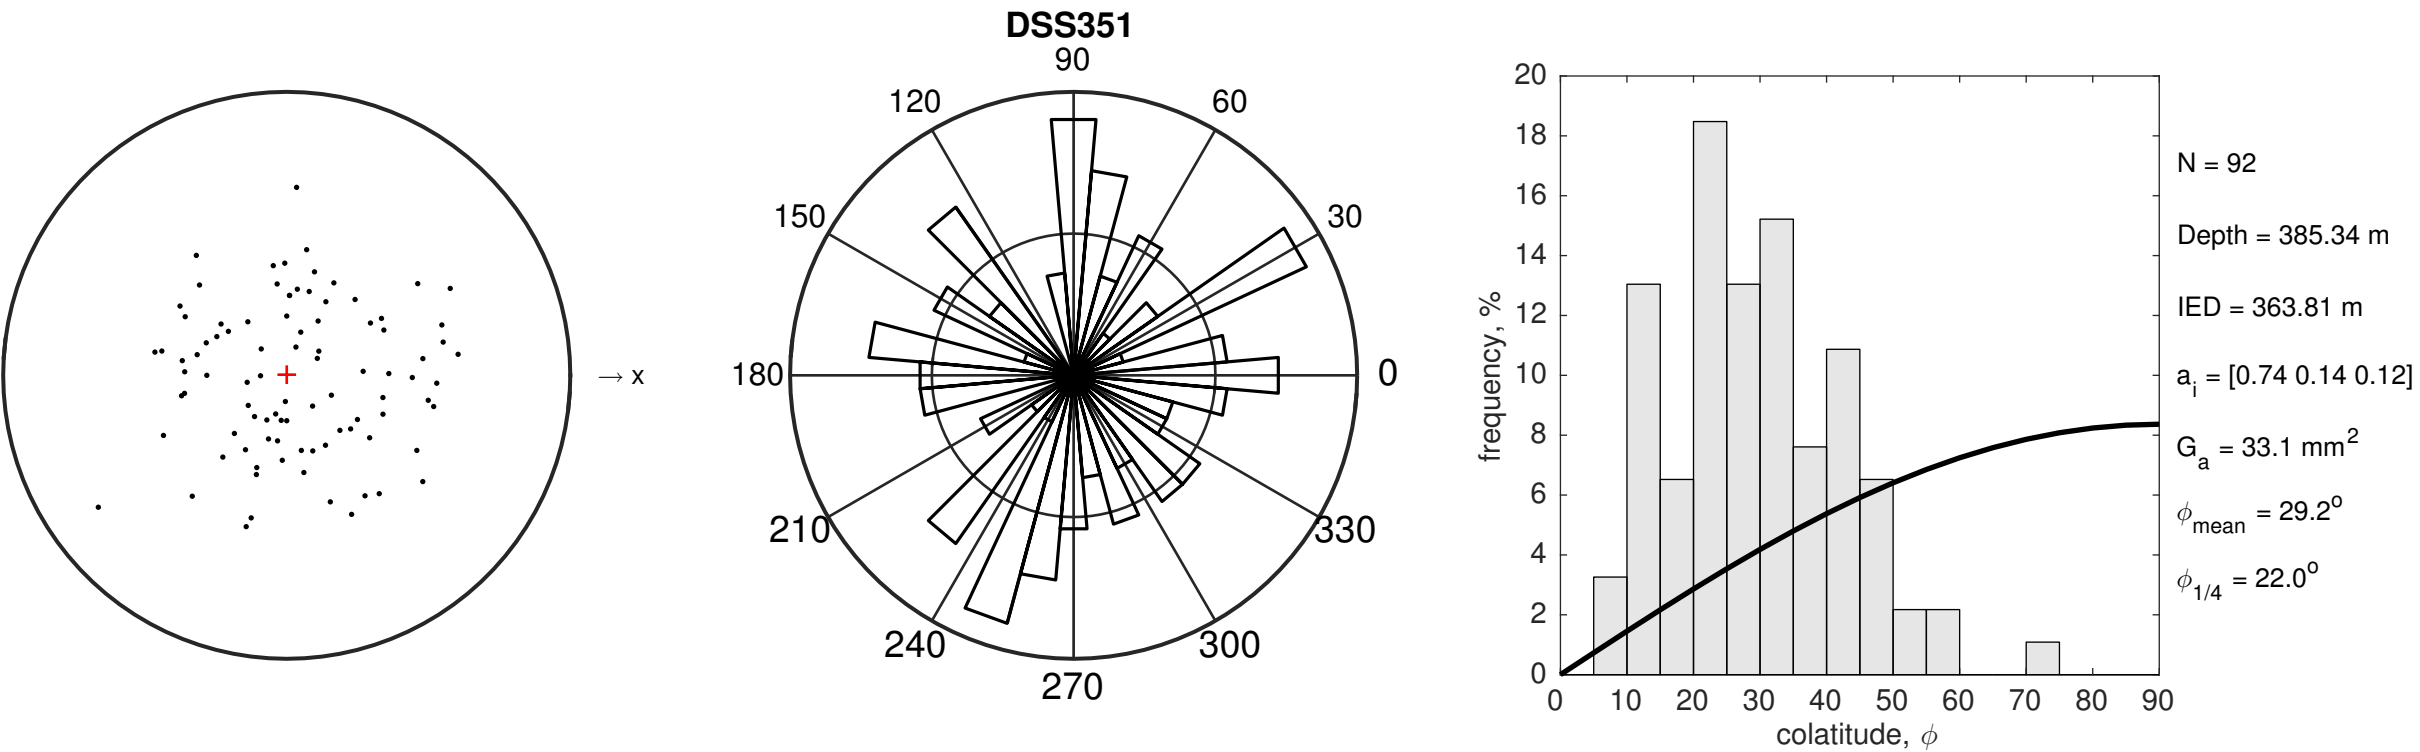

Supplement: Supplementary file 68 [file essd-2015-45-supplement.zip]

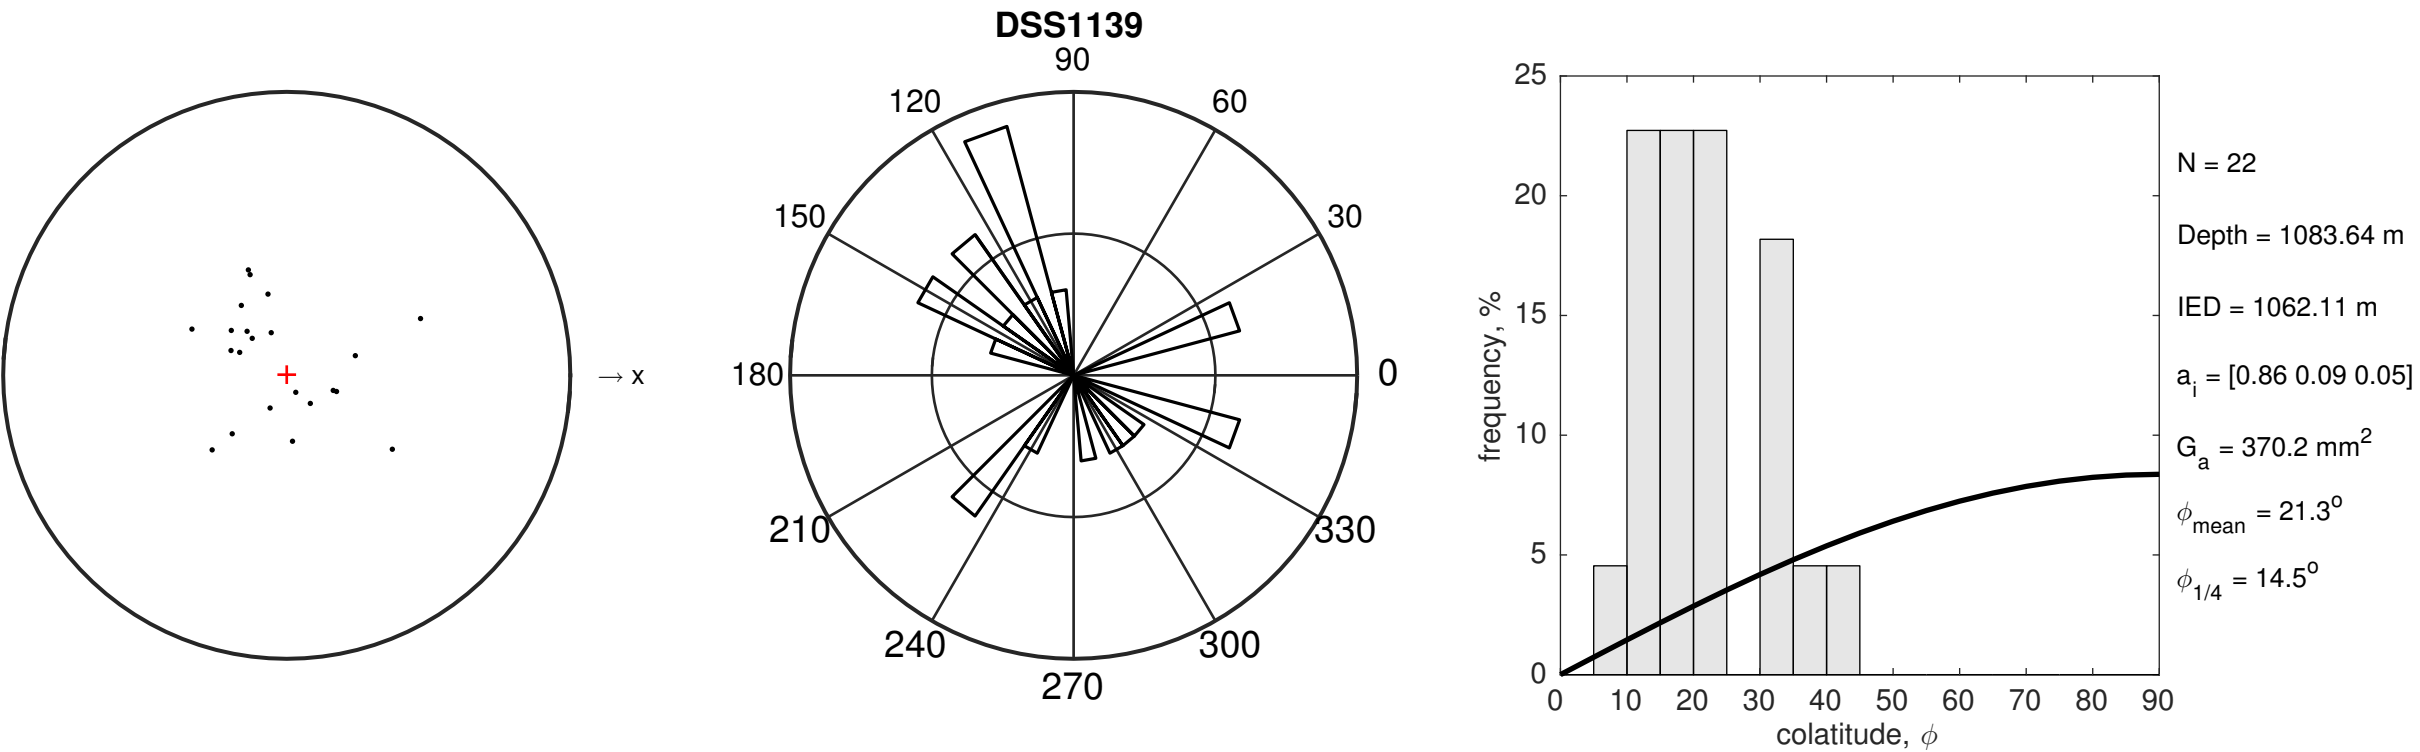

Supplement: Supplementary file 69 [file essd-2015-45-supplement.zip]

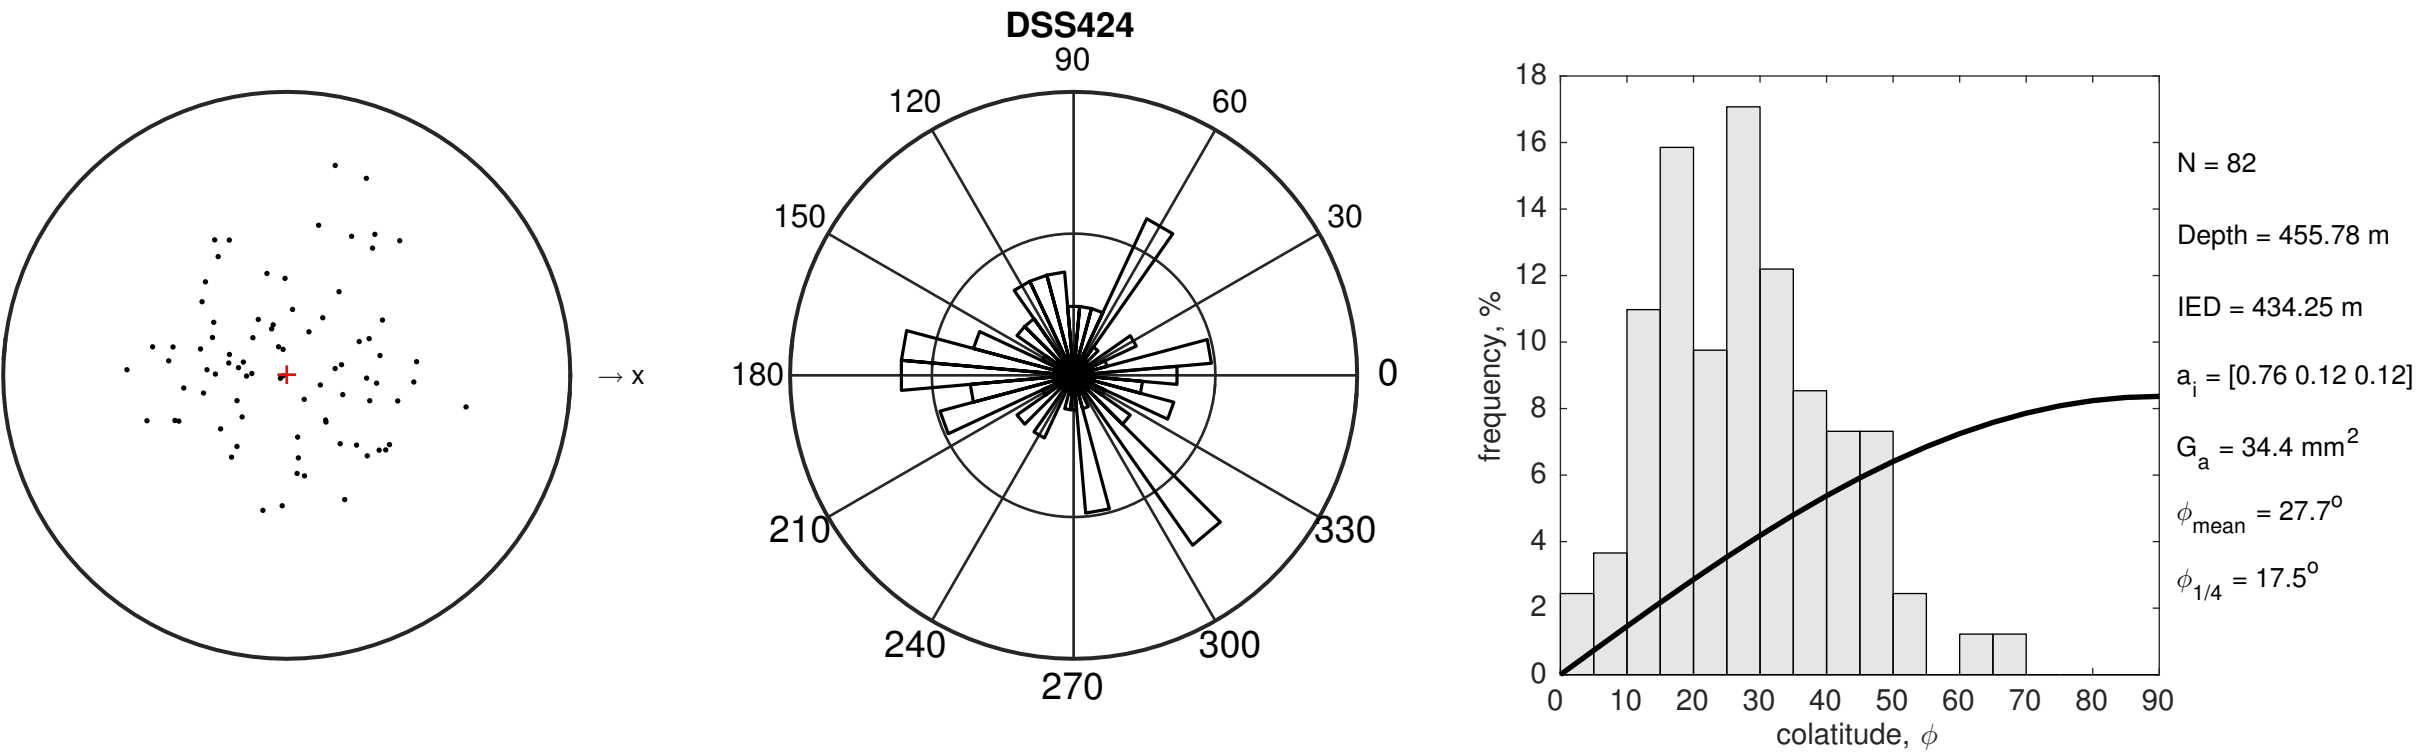

Supplement: Supplementary file 70 [file essd-2015-45-supplement.zip]

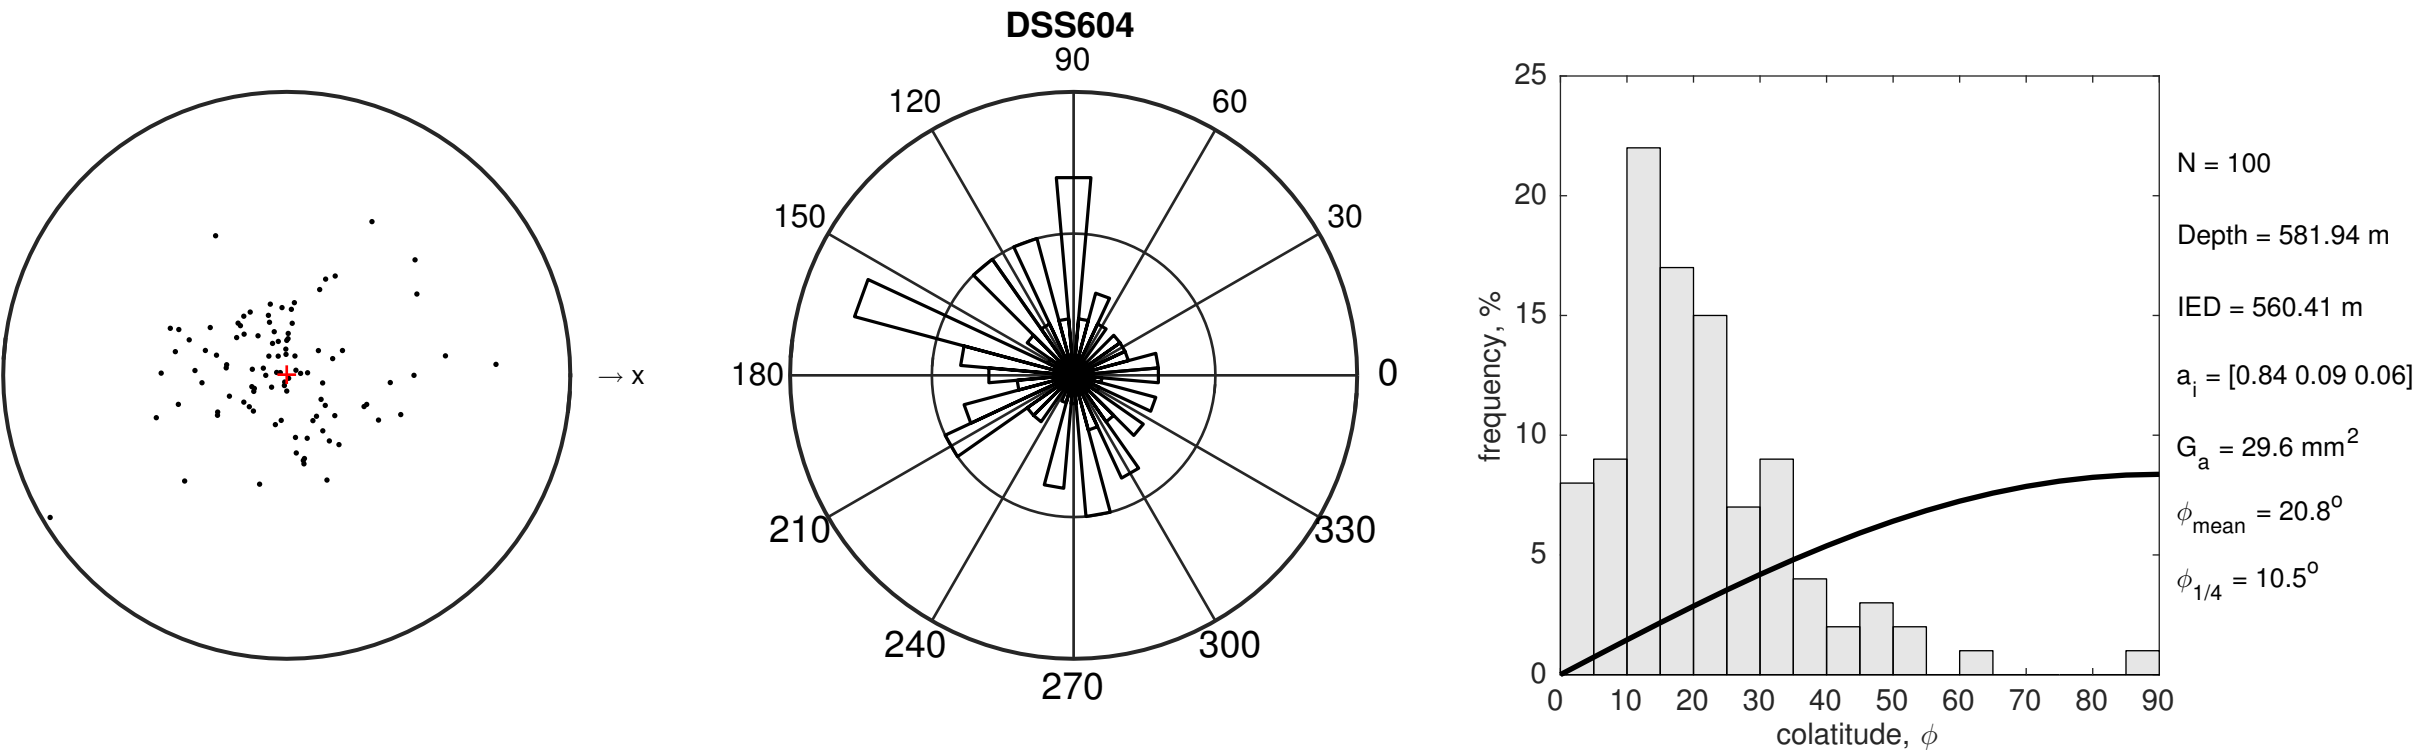

Supplement: Supplementary file 71 [file essd-2015-45-supplement.zip]

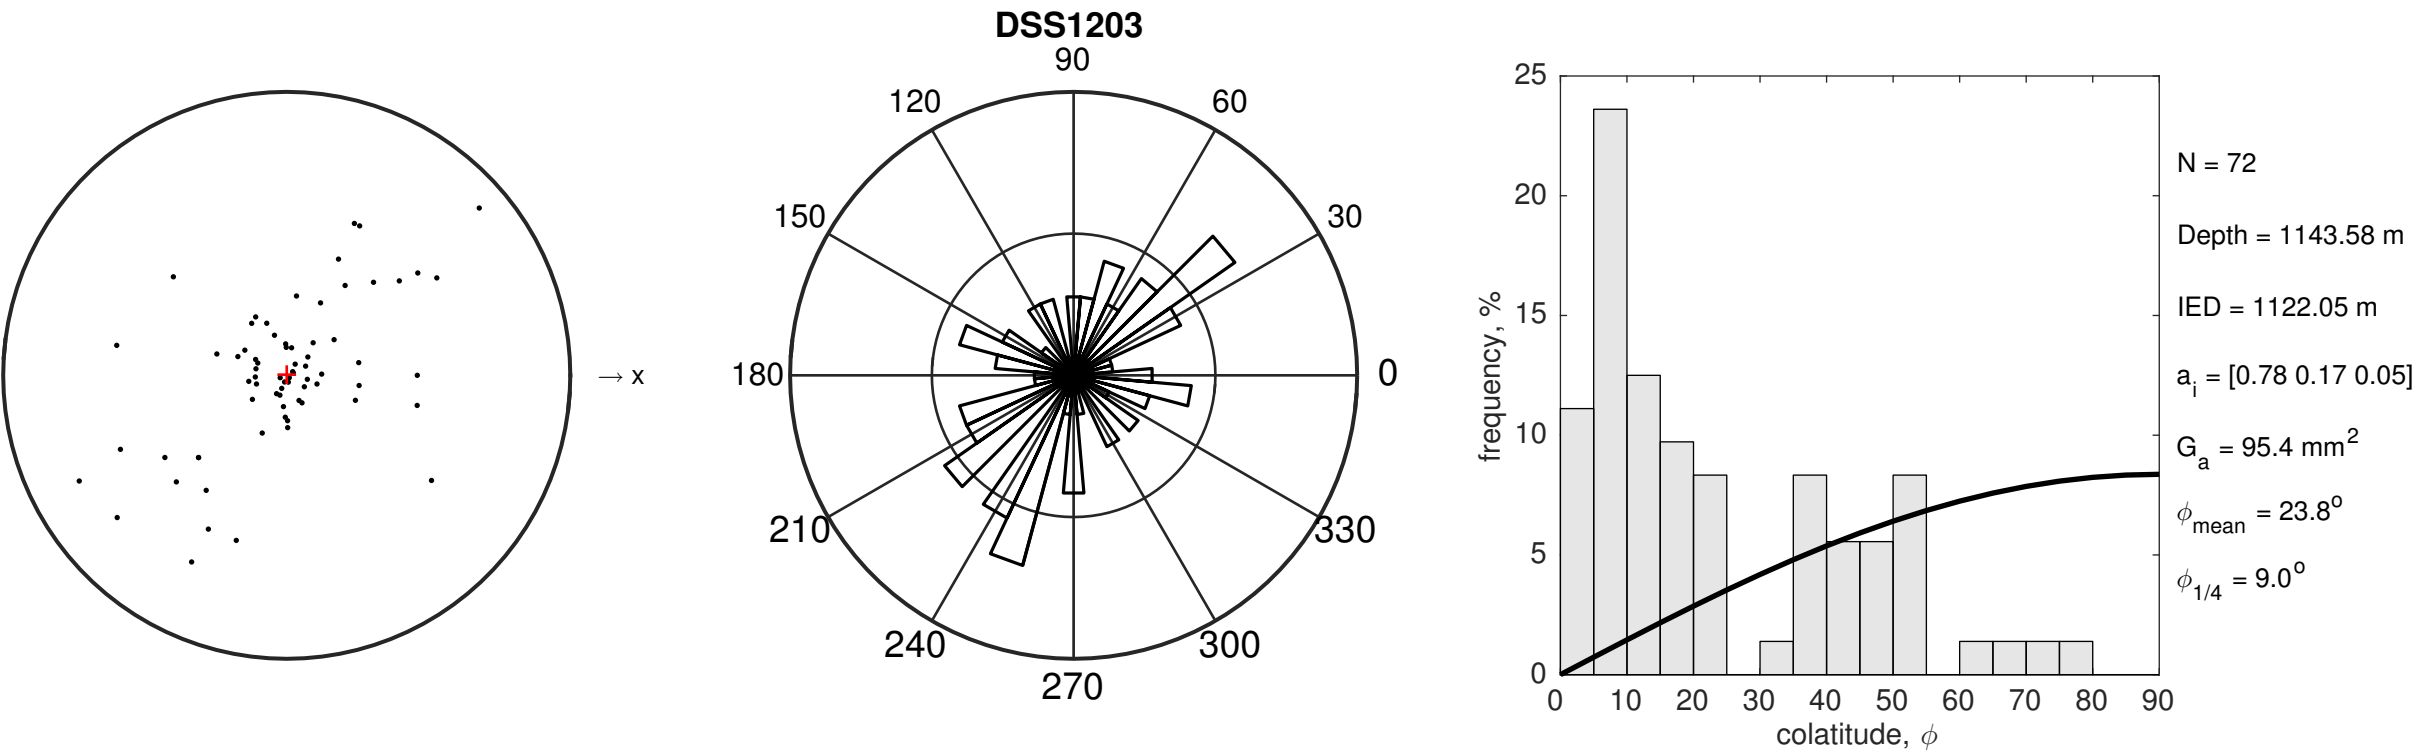

Supplement: Supplementary file 72 [file essd-2015-45-supplement.zip]

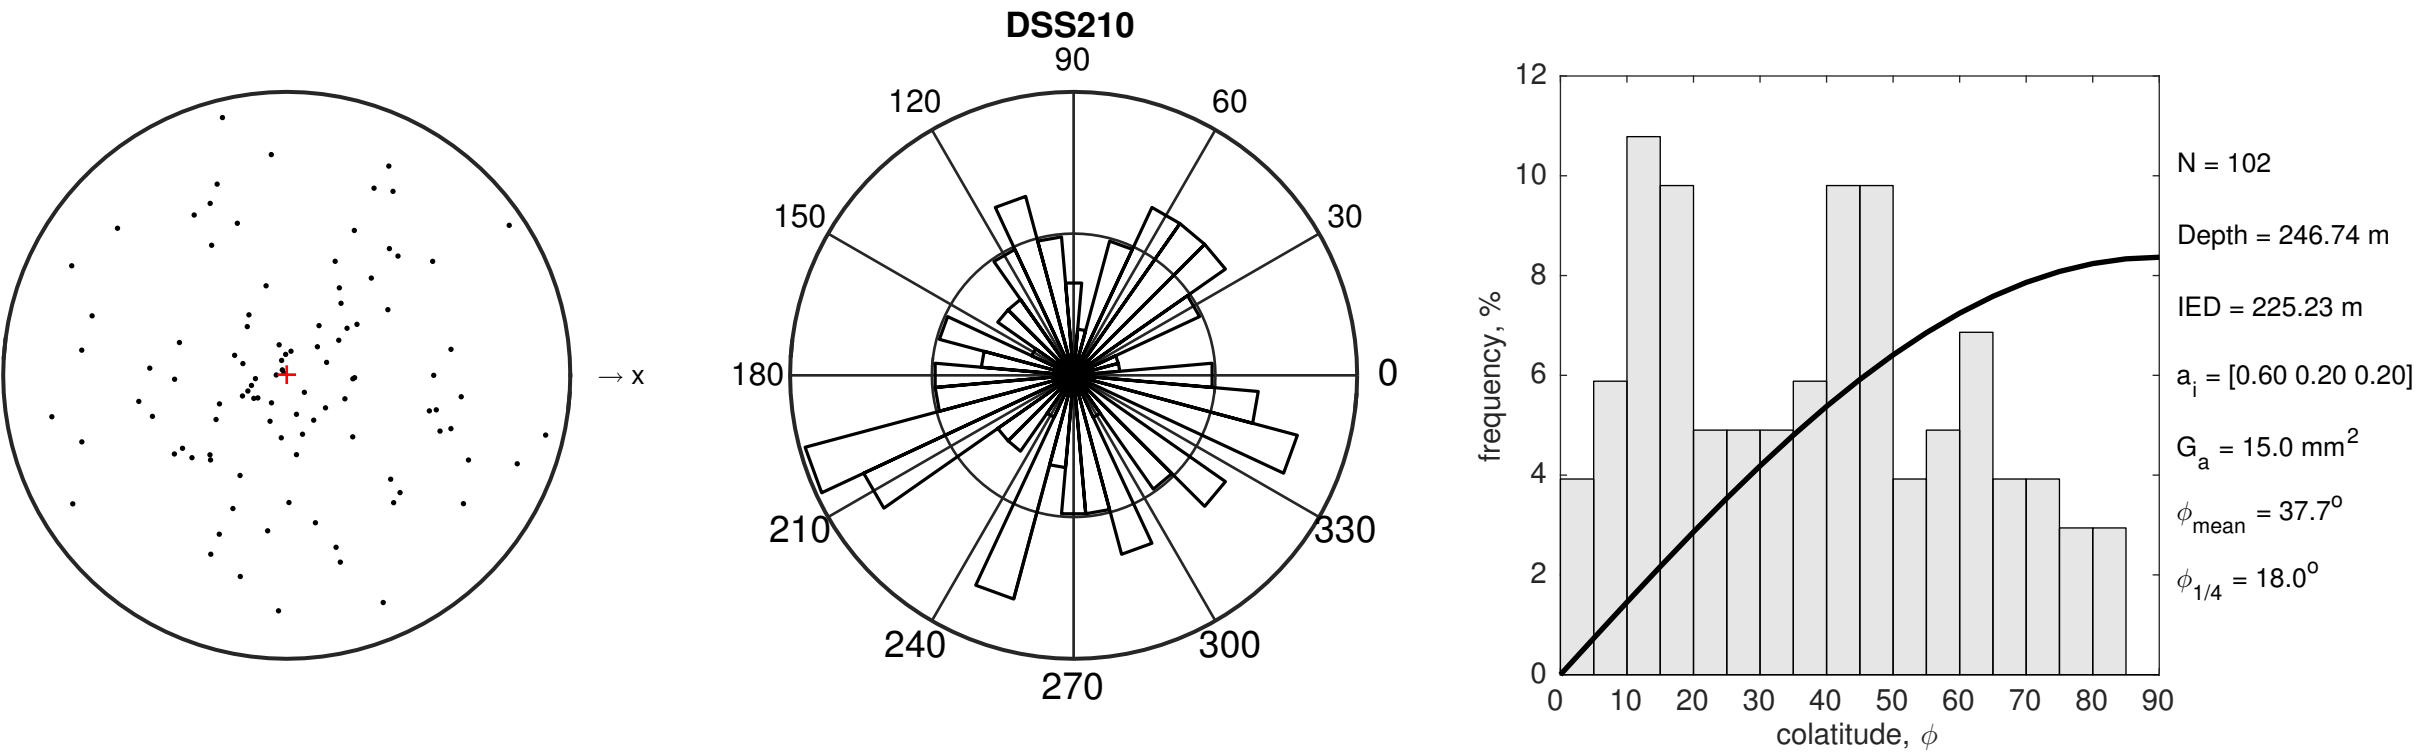

Supplement: Supplementary file 73 [file essd-2015-45-supplement.zip]

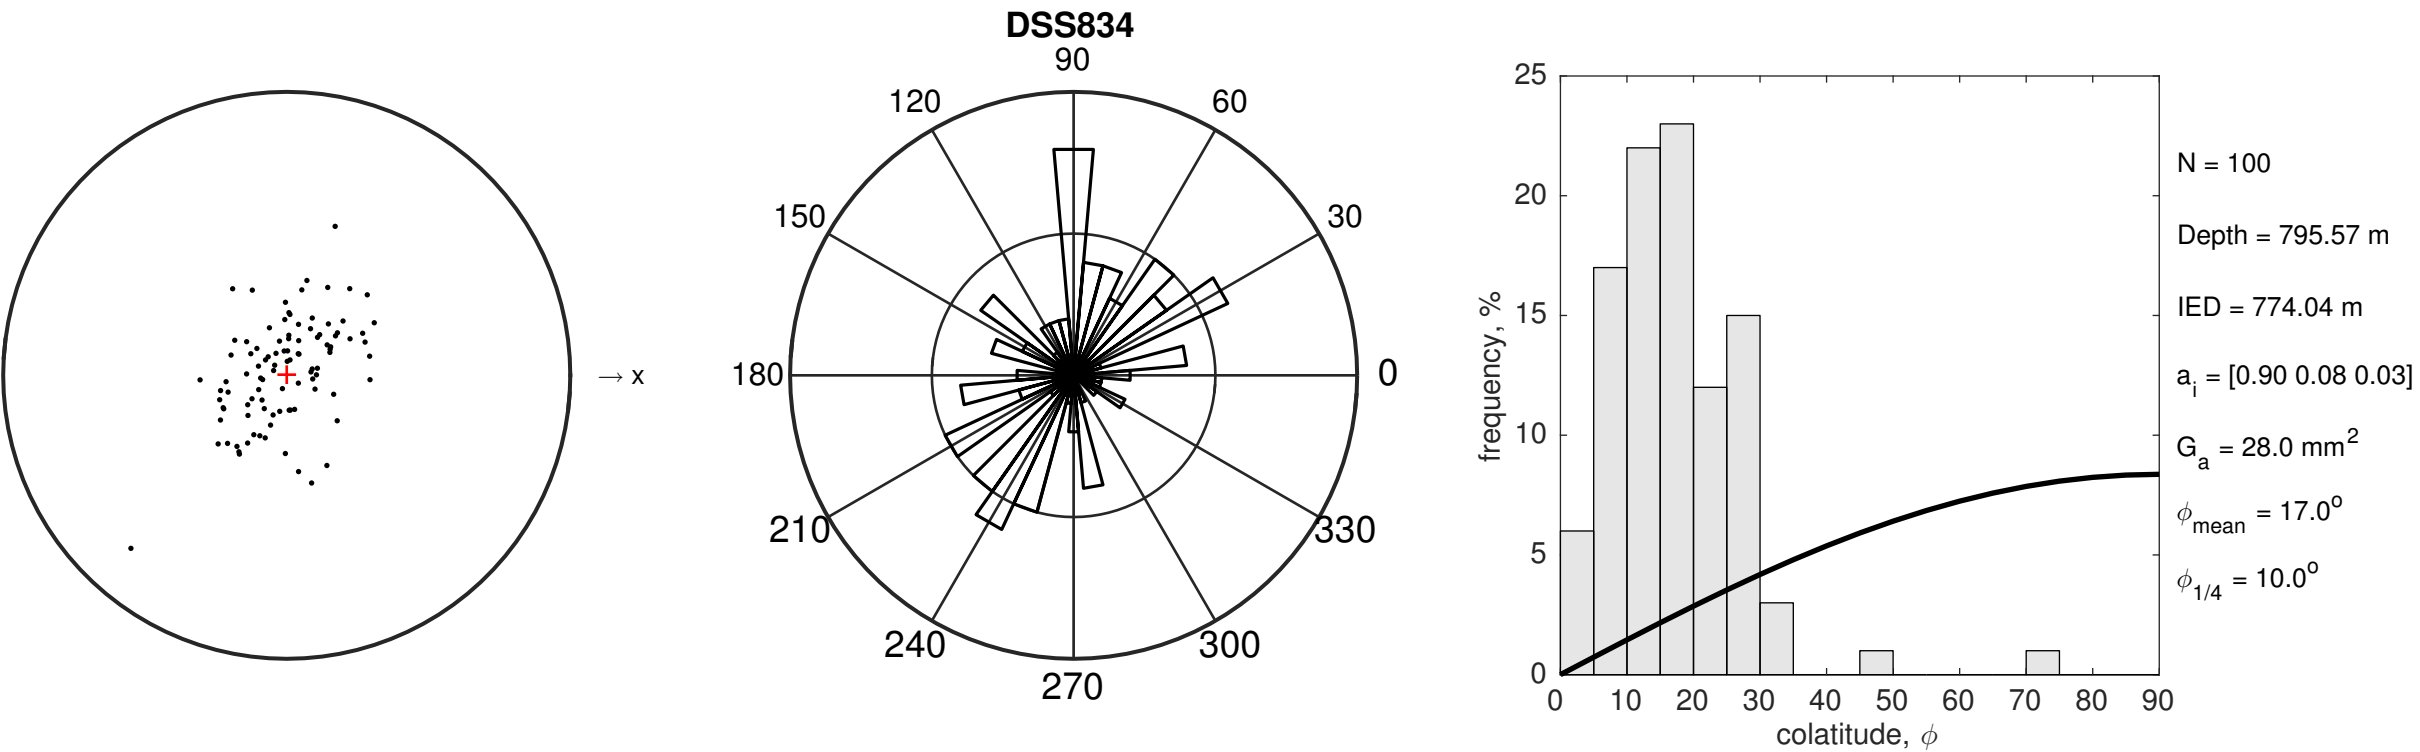

Supplement: Supplementary file 74 [file essd-2015-45-supplement.zip]

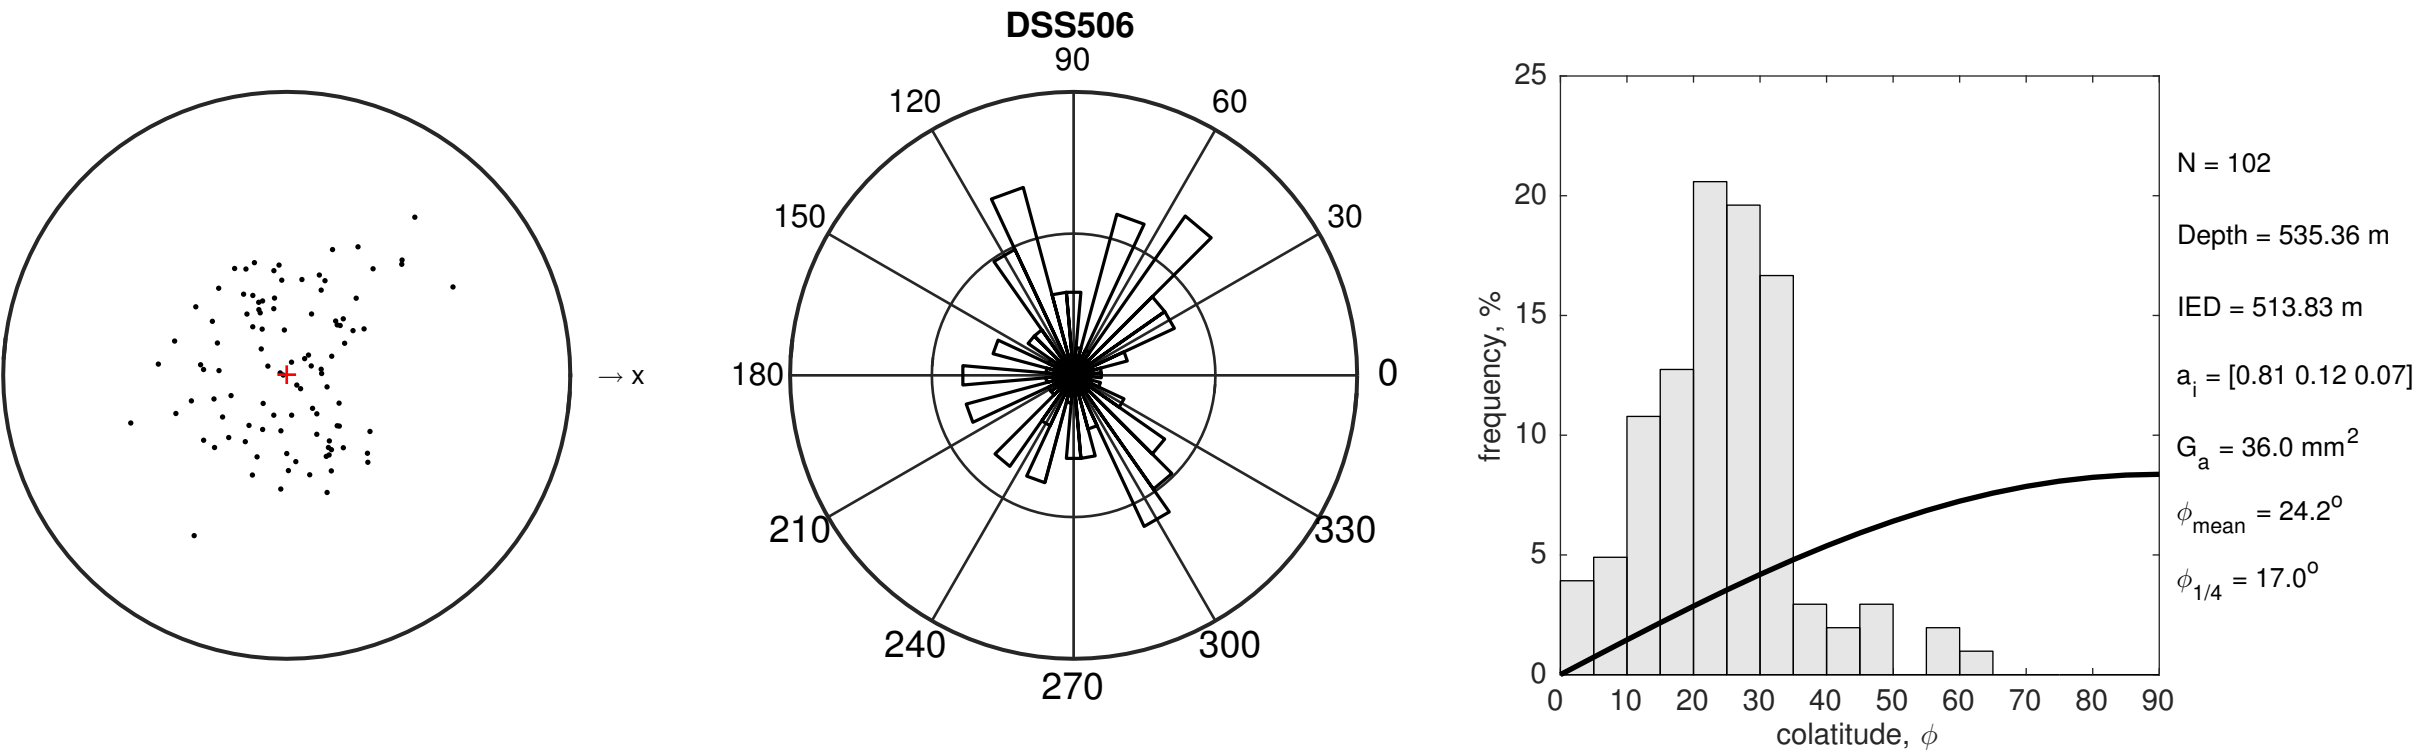

Supplement: Supplementary file 75 [file essd-2015-45-supplement.zip]

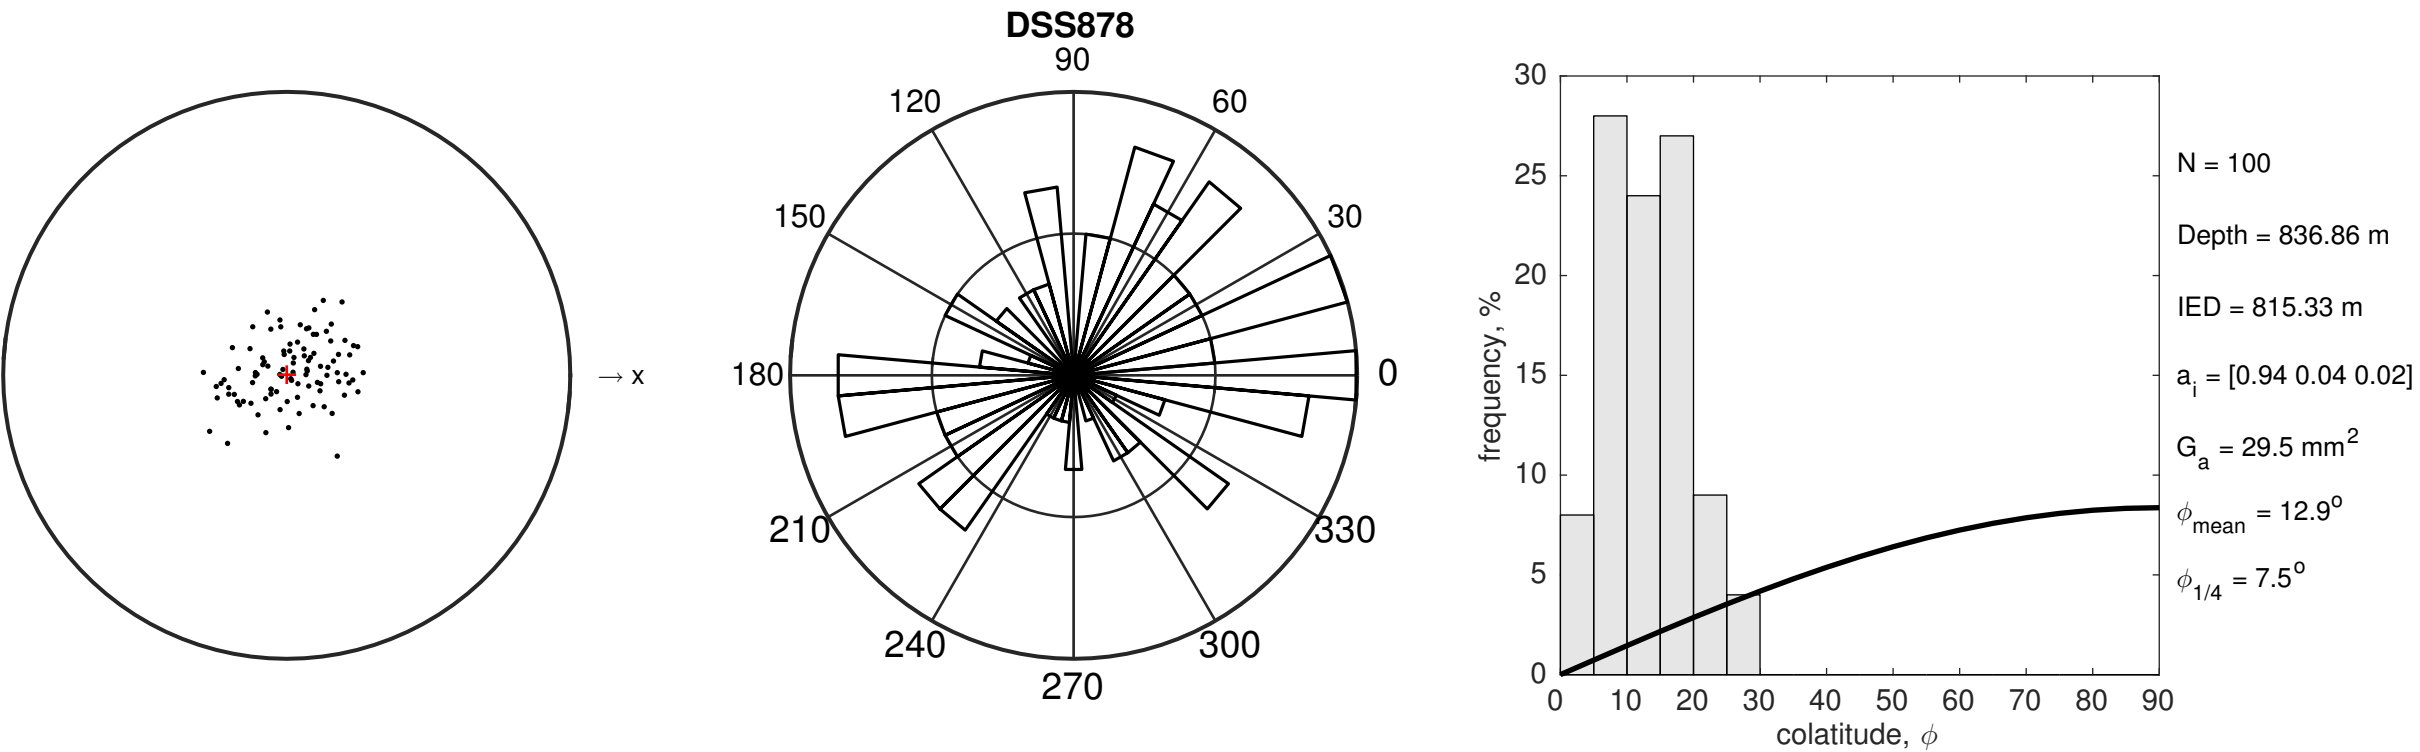

Supplement: Supplementary file 76 [file essd-2015-45-supplement.zip]

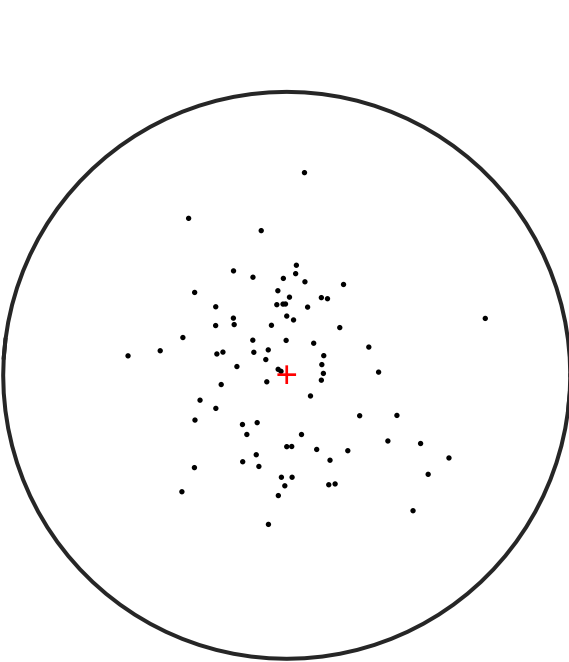

→ x

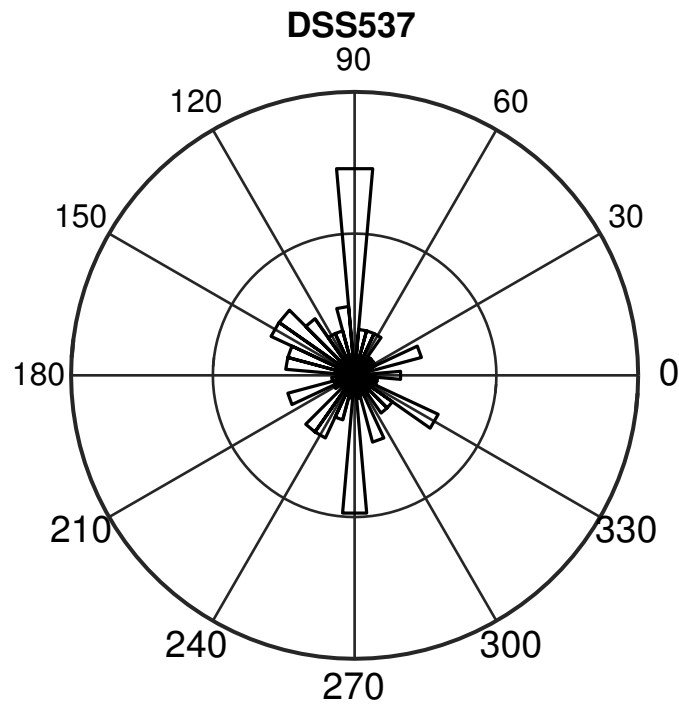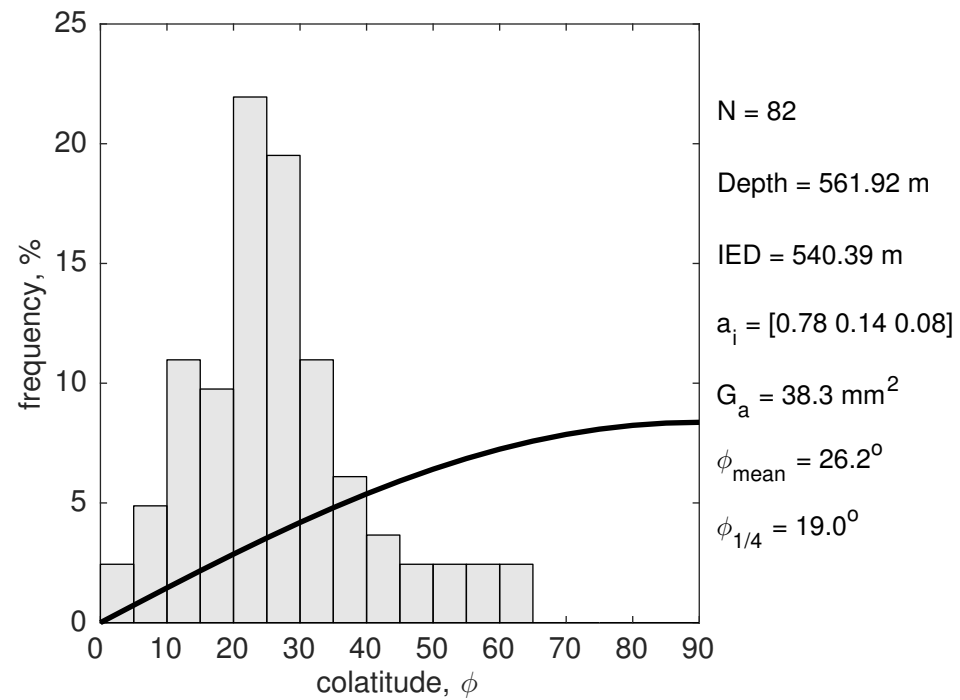

Supplement: Supplementary file 77 [file essd-2015-45-supplement.zip]

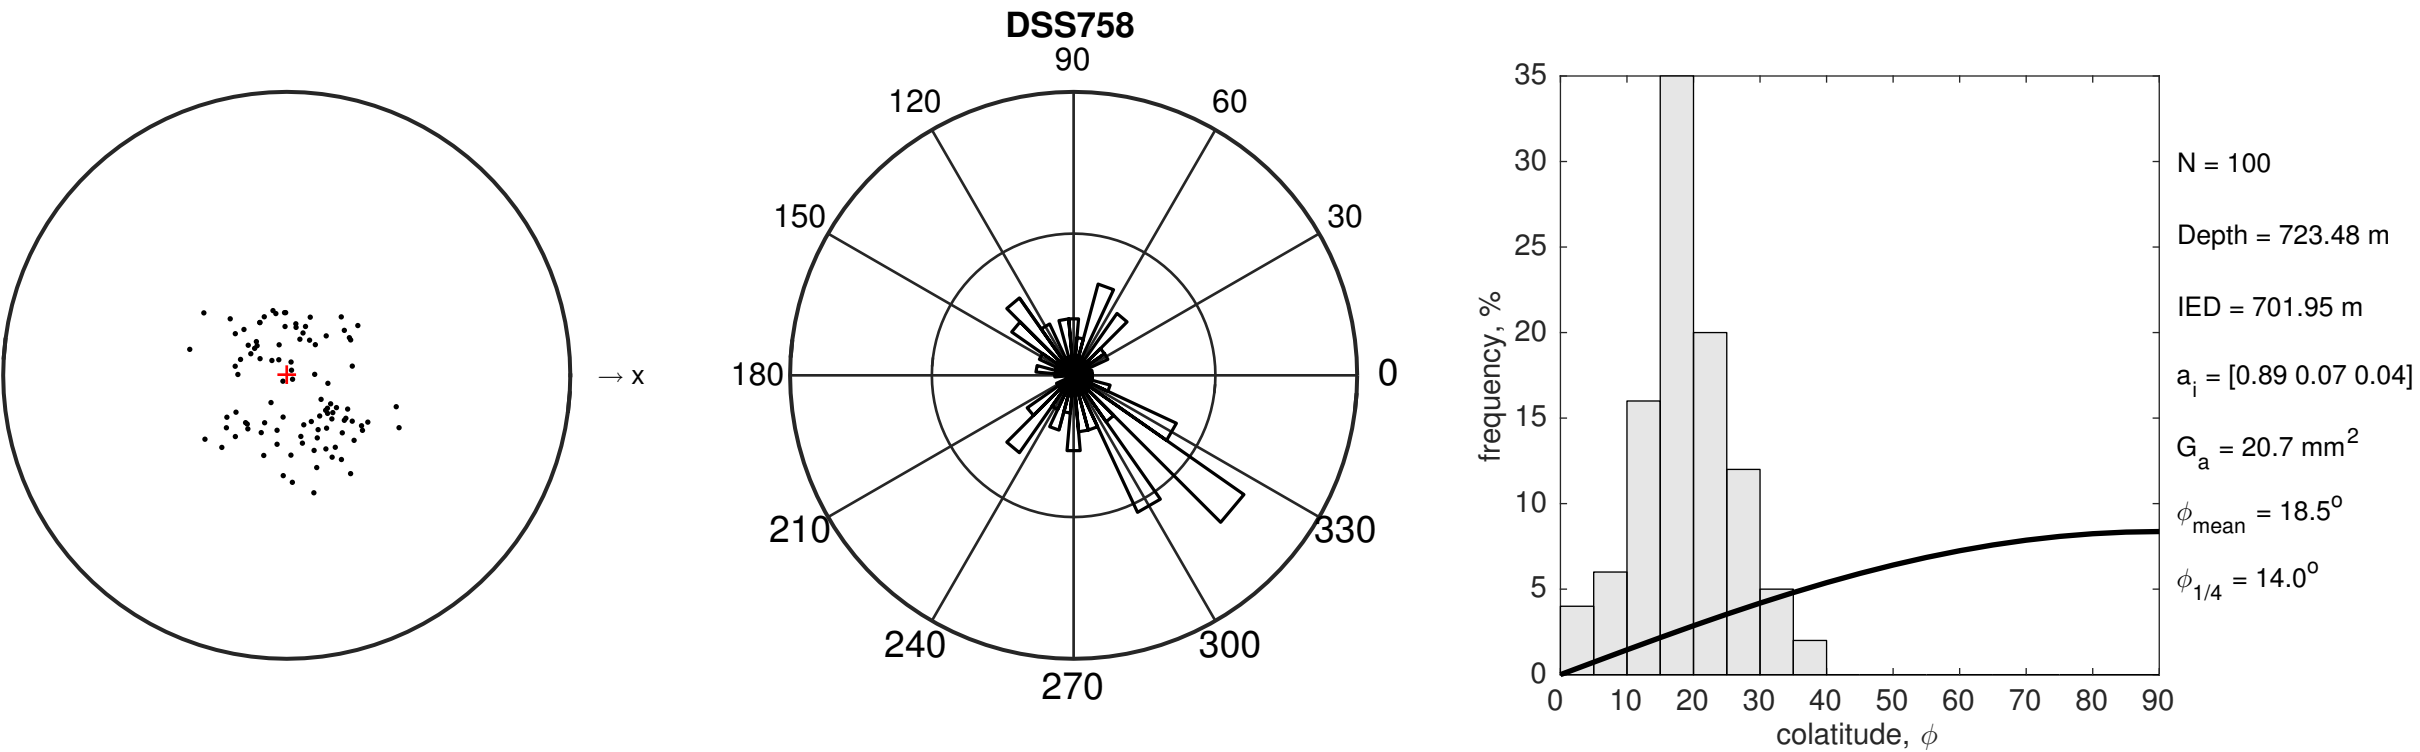

Supplement: Supplementary file 78 [file essd-2015-45-supplement.zip]

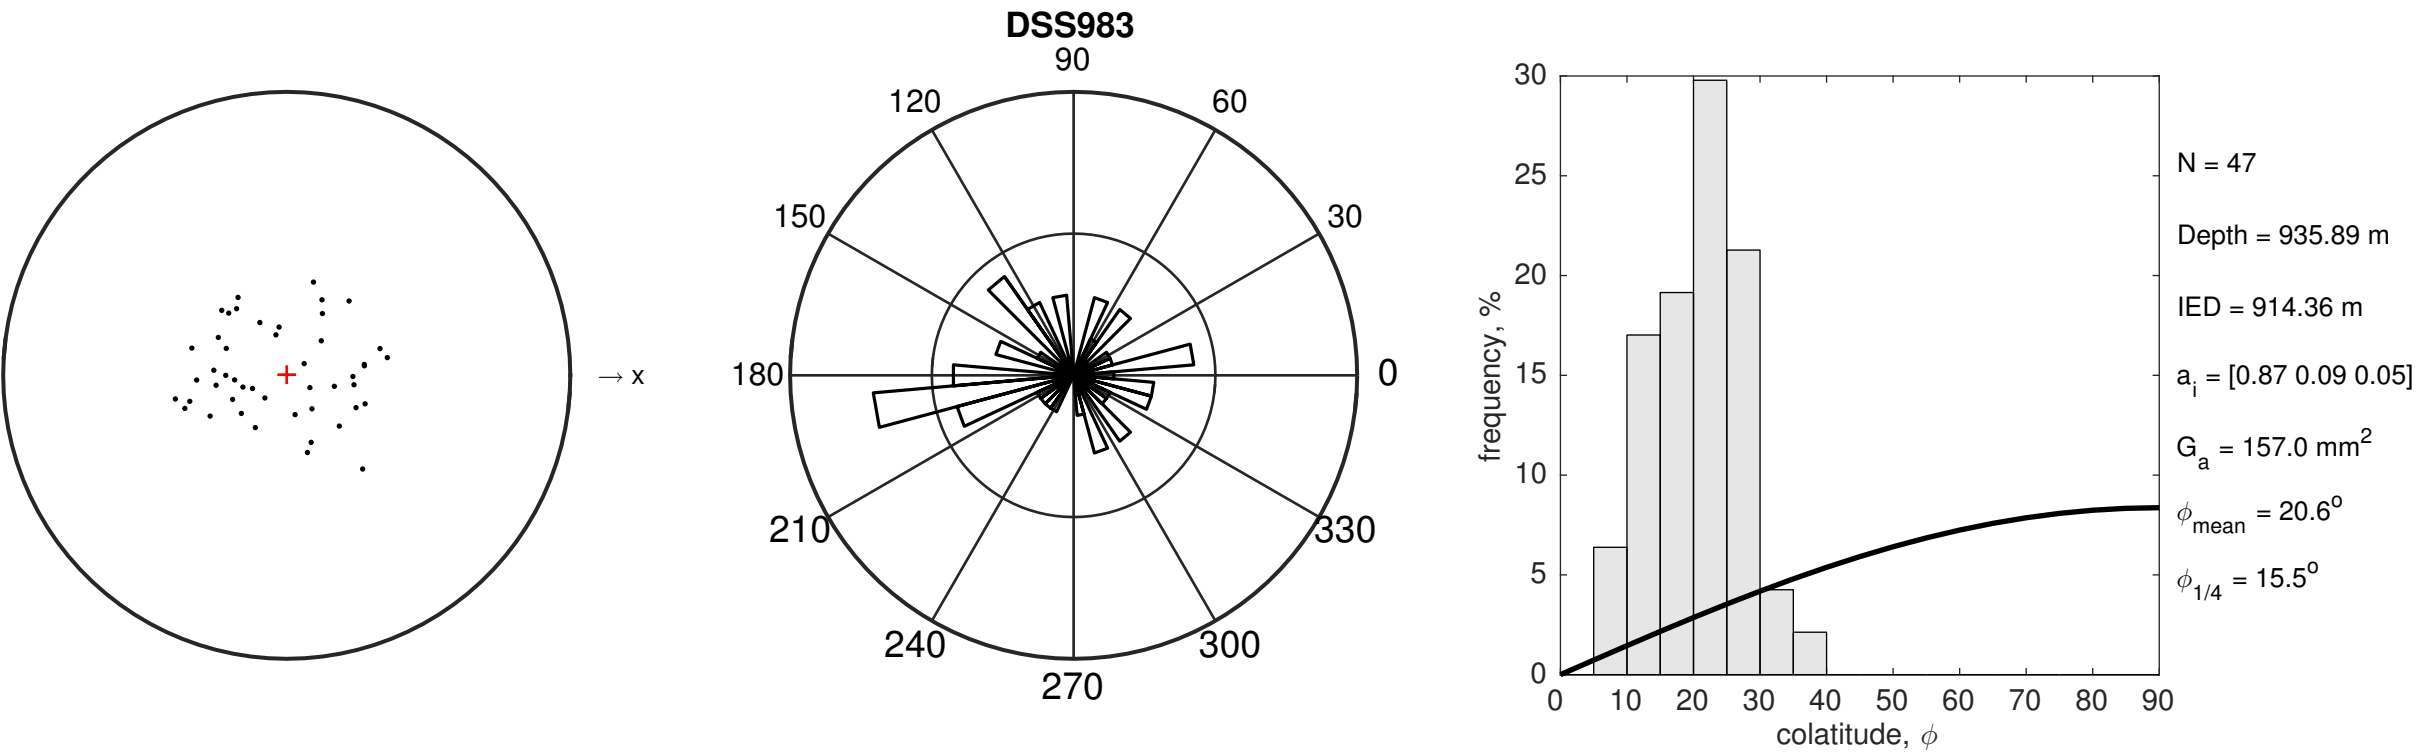

Supplement: Supplementary file 79 [file essd-2015-45-supplement.zip]

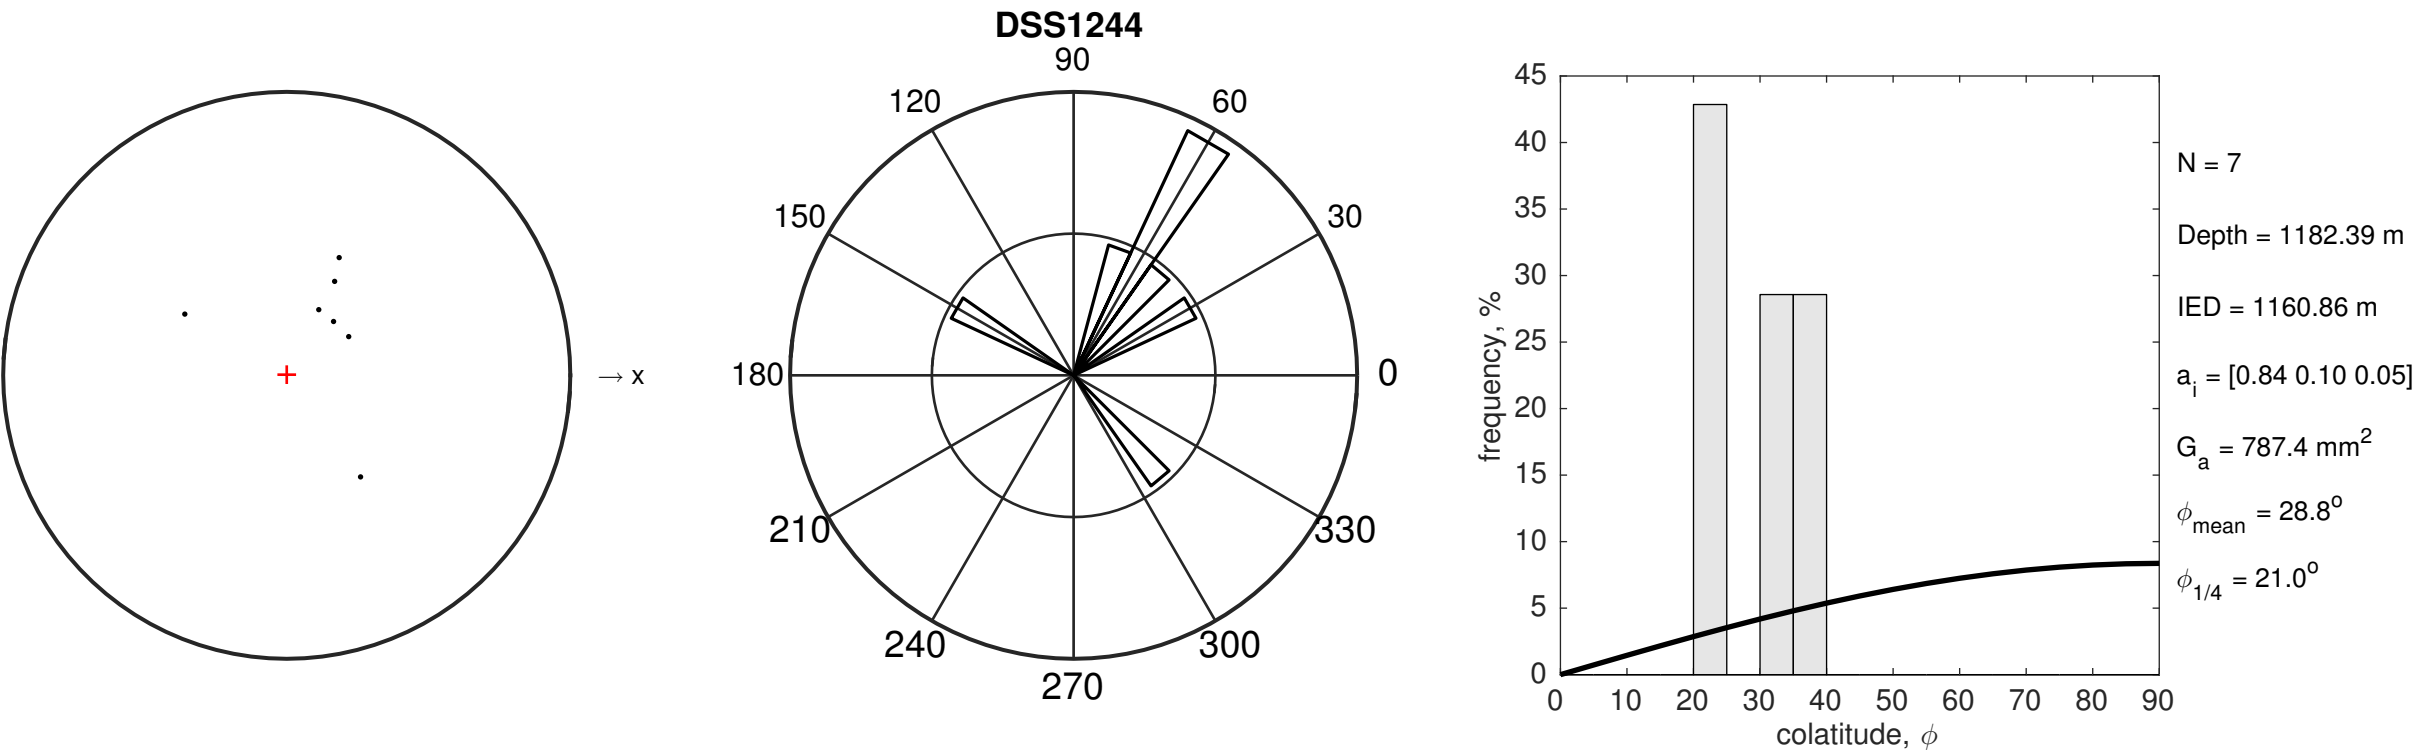

Supplement: Supplementary file 80 [file essd-2015-45-supplement.zip]

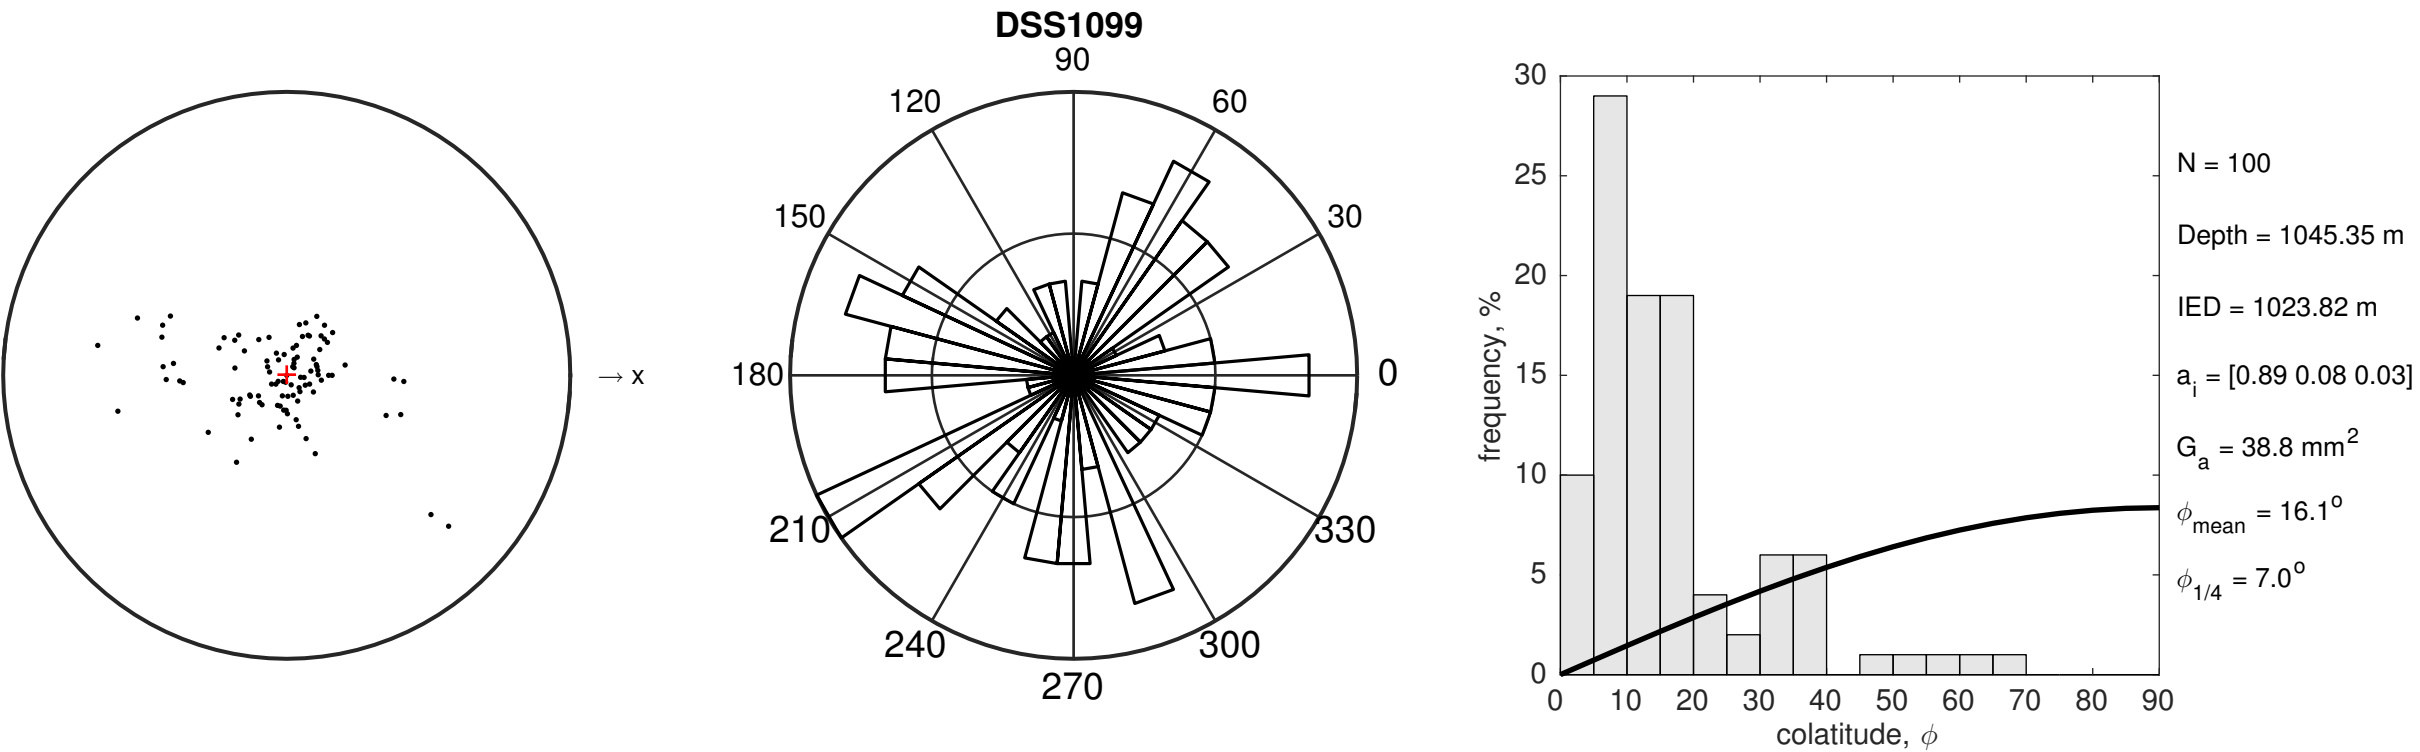

Supplement: Supplementary file 81 [file essd-2015-45-supplement.zip]

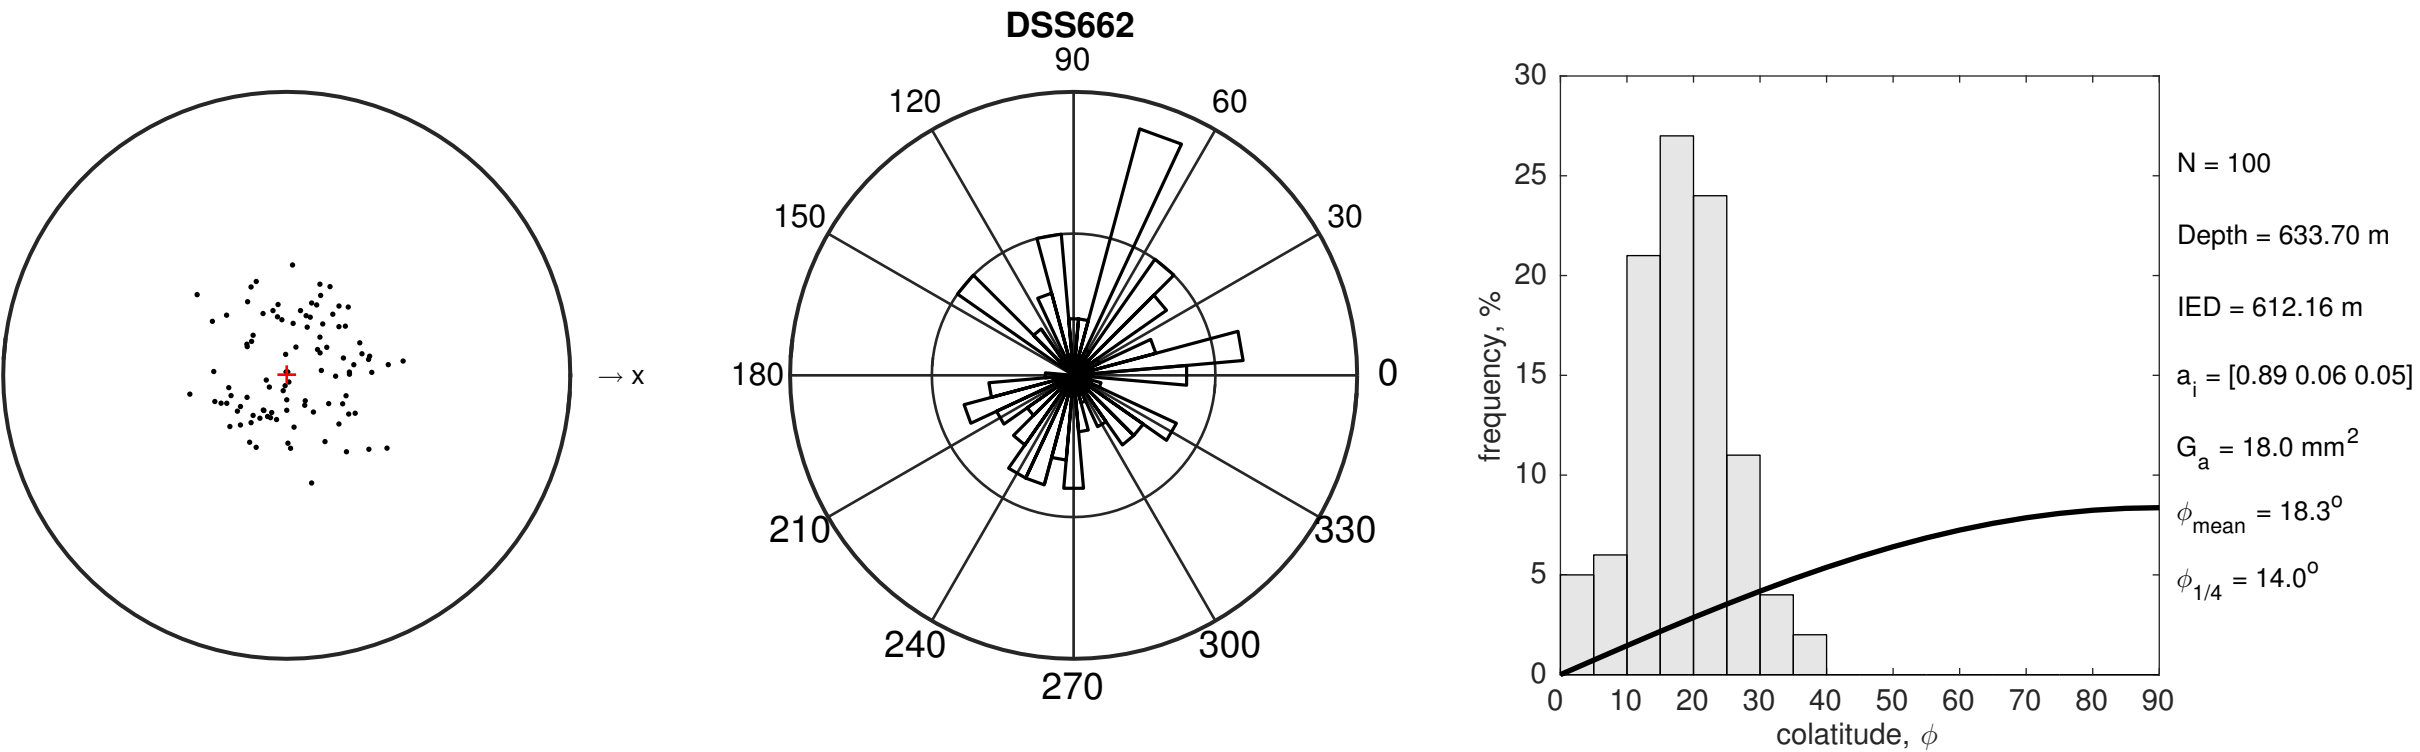

Supplement: Supplementary file 82 [file essd-2015-45-supplement.zip]

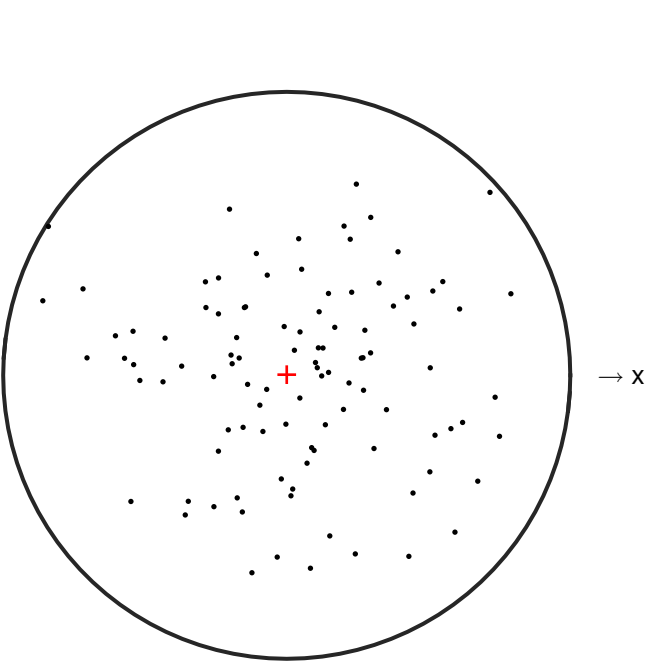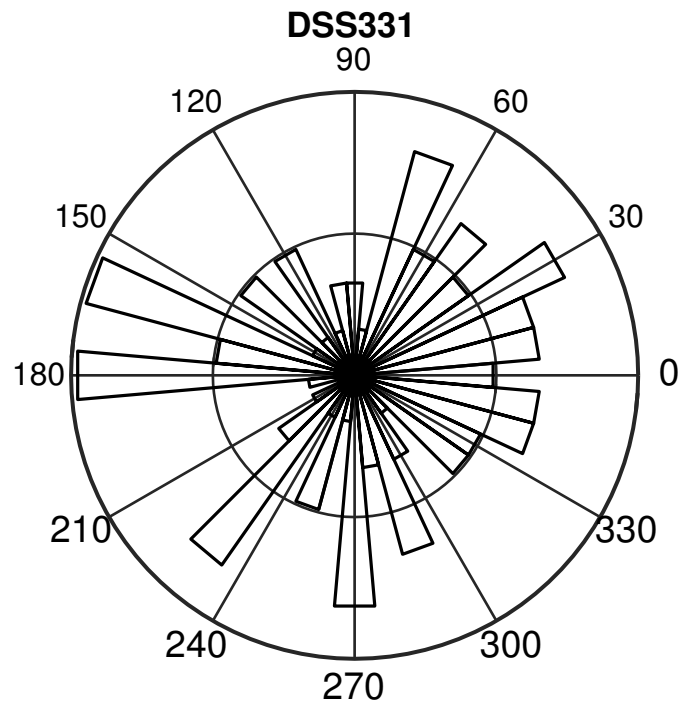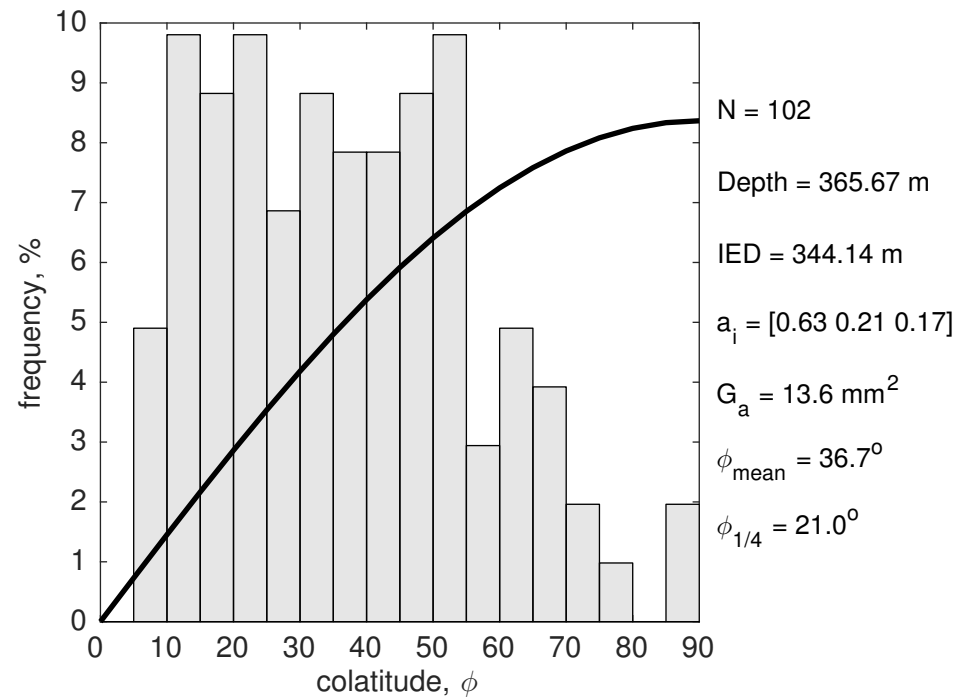

Supplement: Supplementary file 83 [file essd-2015-45-supplement.zip]

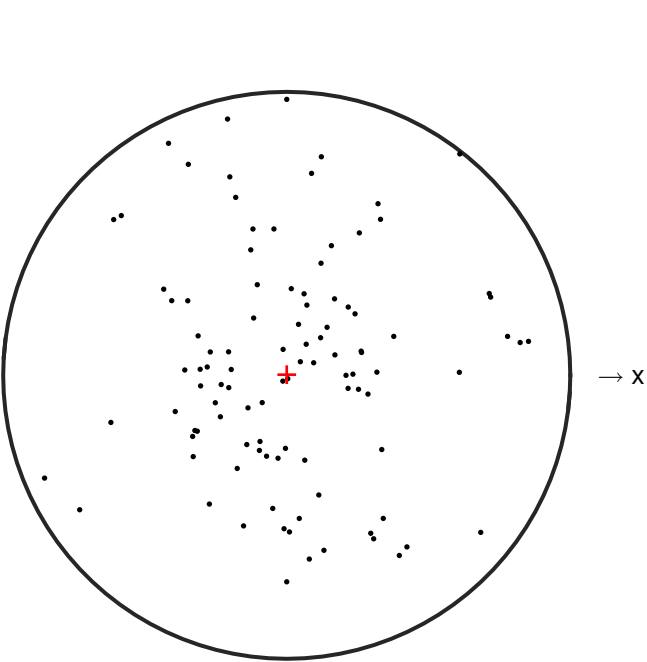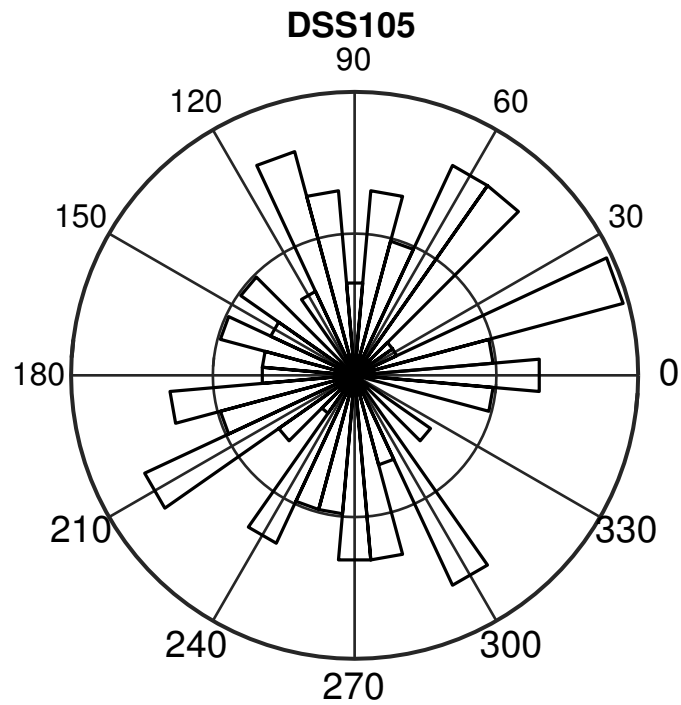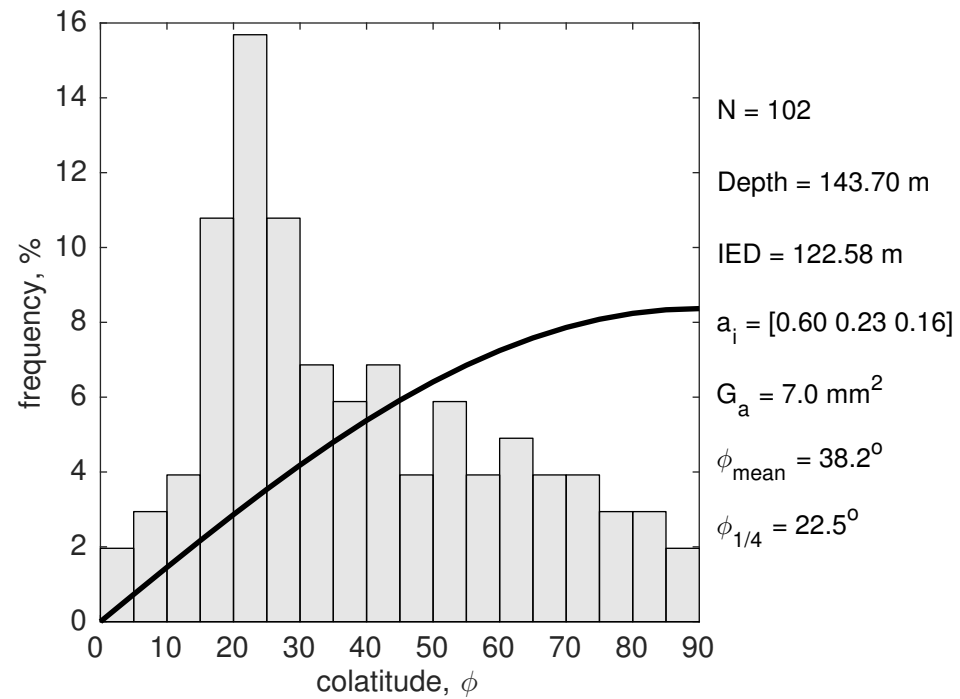

Supplement: Supplementary file 84 [file essd-2015-45-supplement.zip]

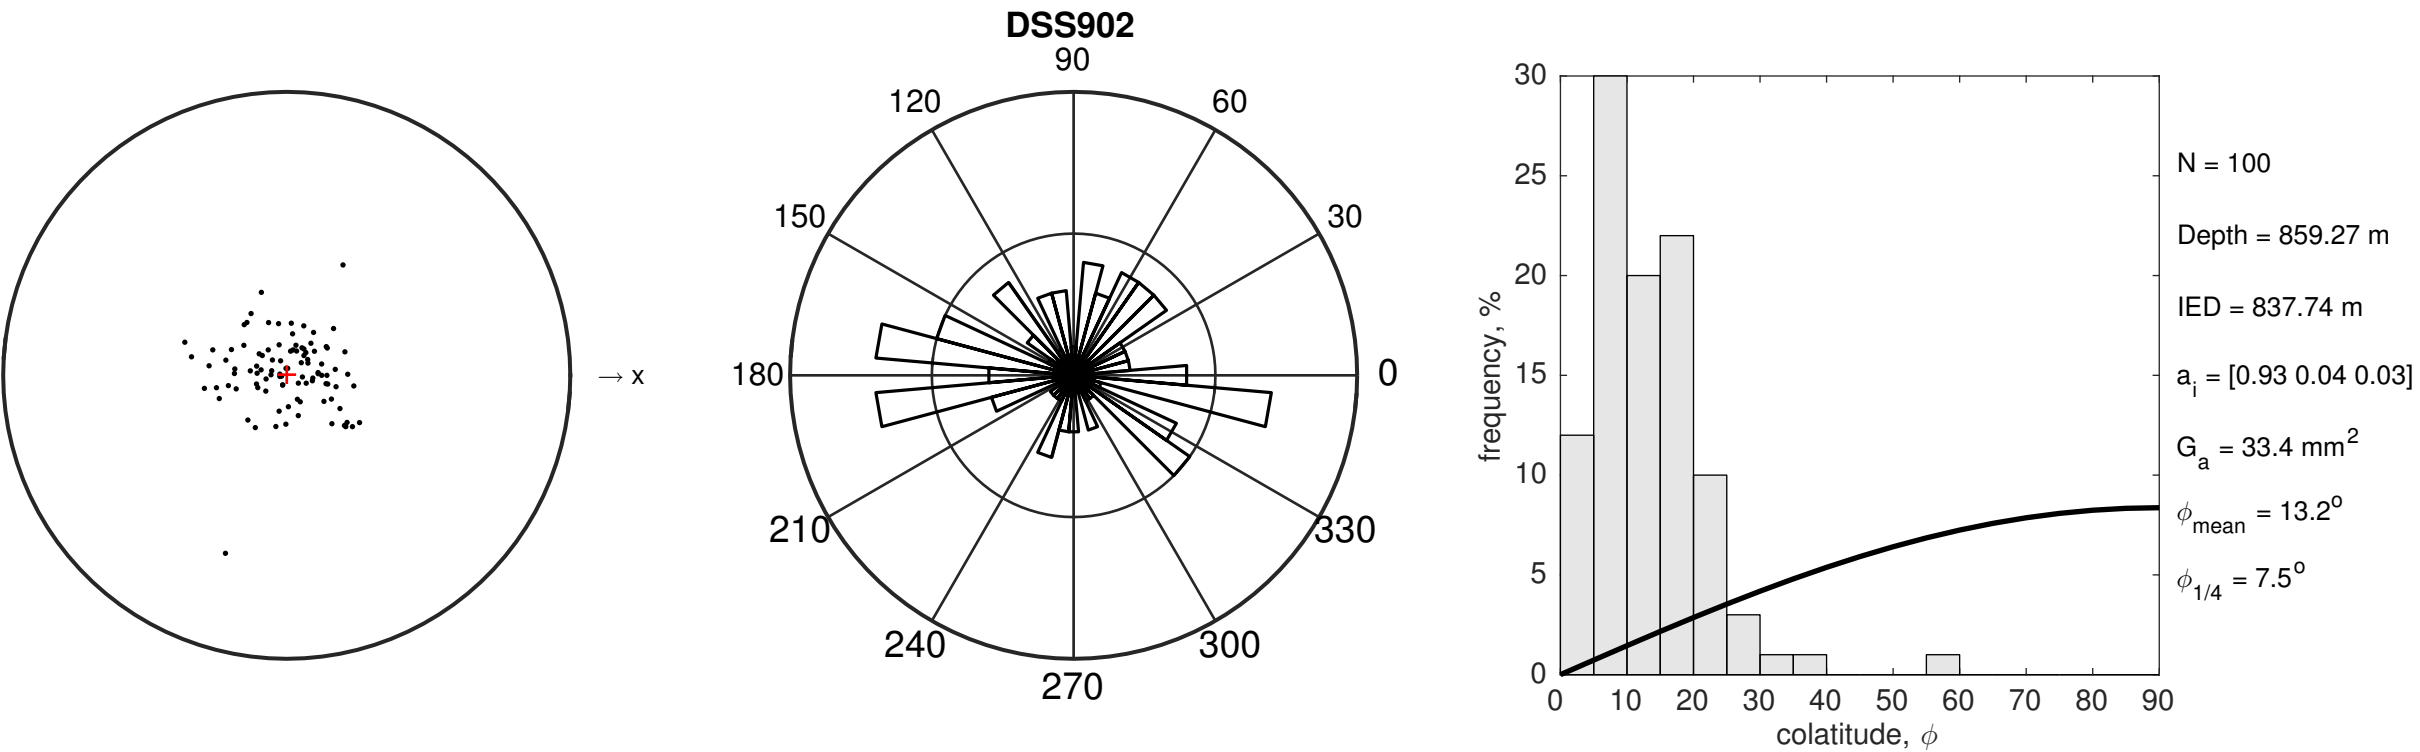

Supplement: Supplementary file 85 [file essd-2015-45-supplement.zip]

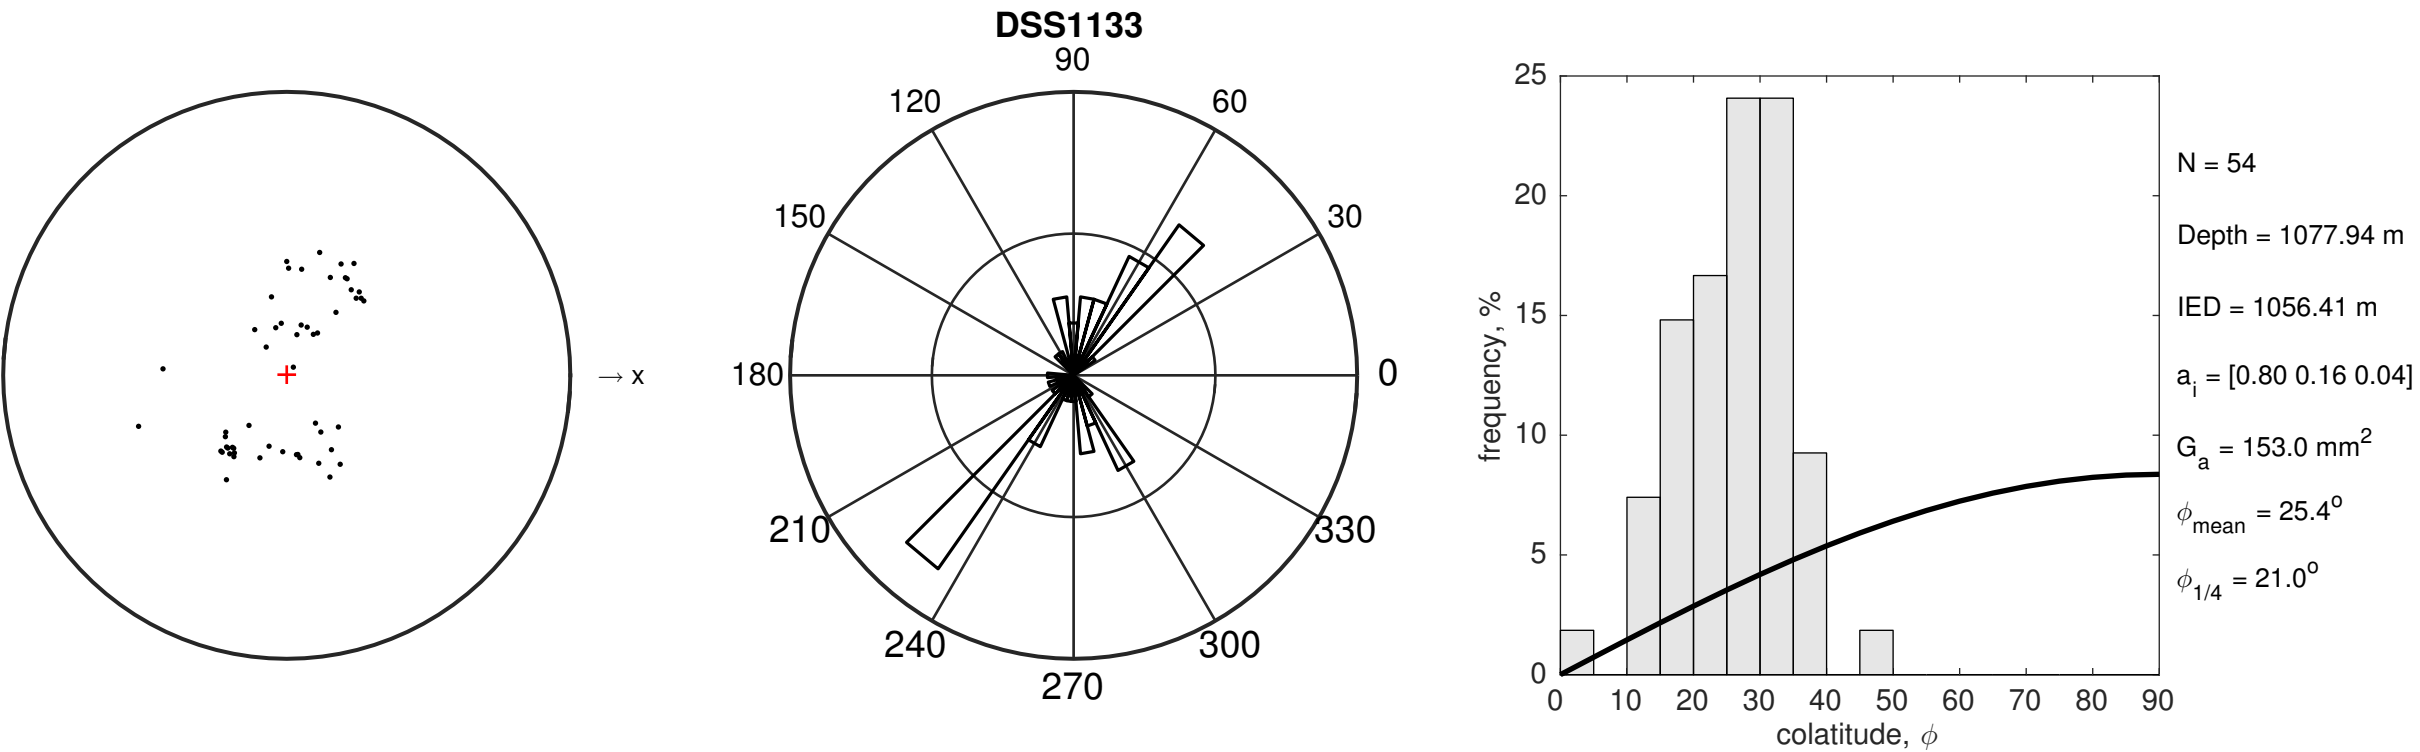

Supplement: Supplementary file 86 [file essd-2015-45-supplement.zip]

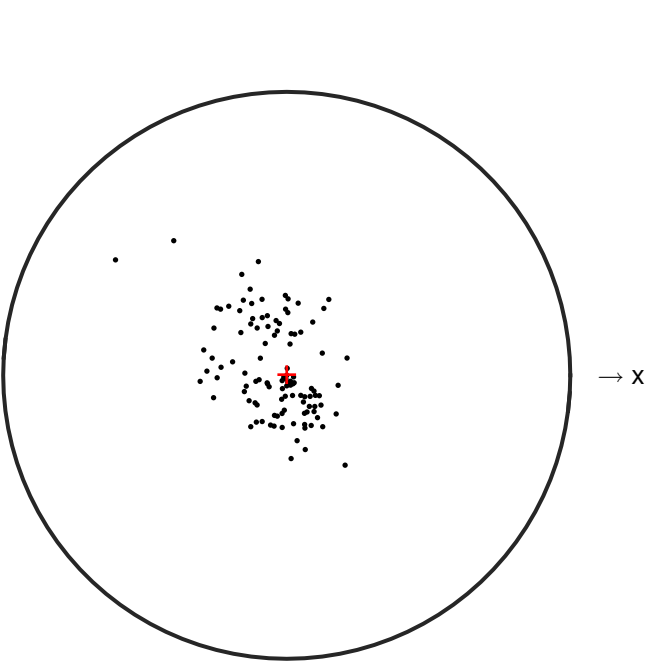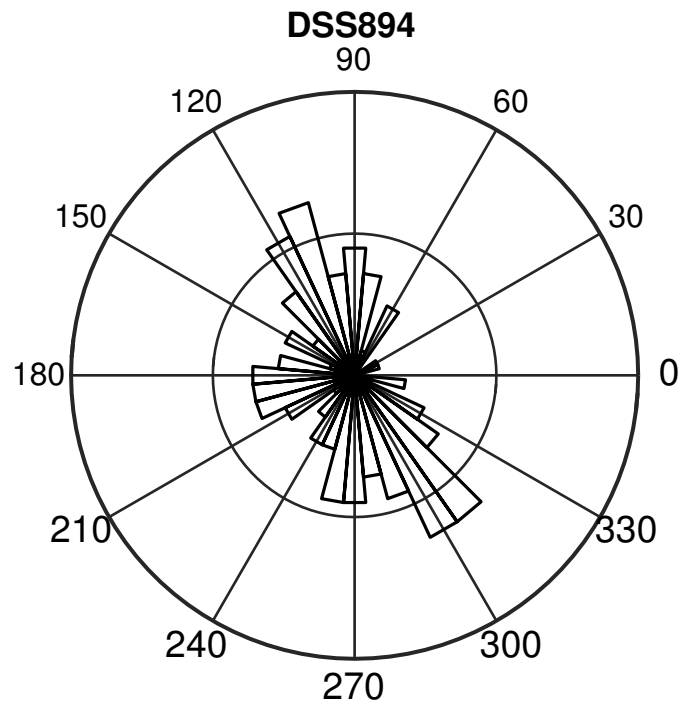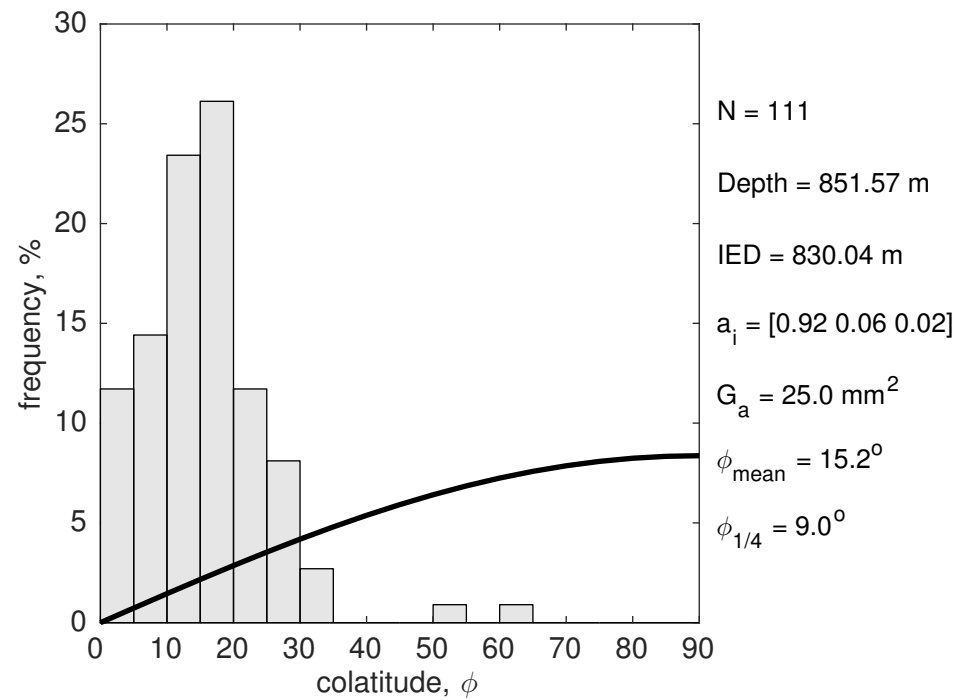

Supplement: Supplementary file 87 [file essd-2015-45-supplement.zip]

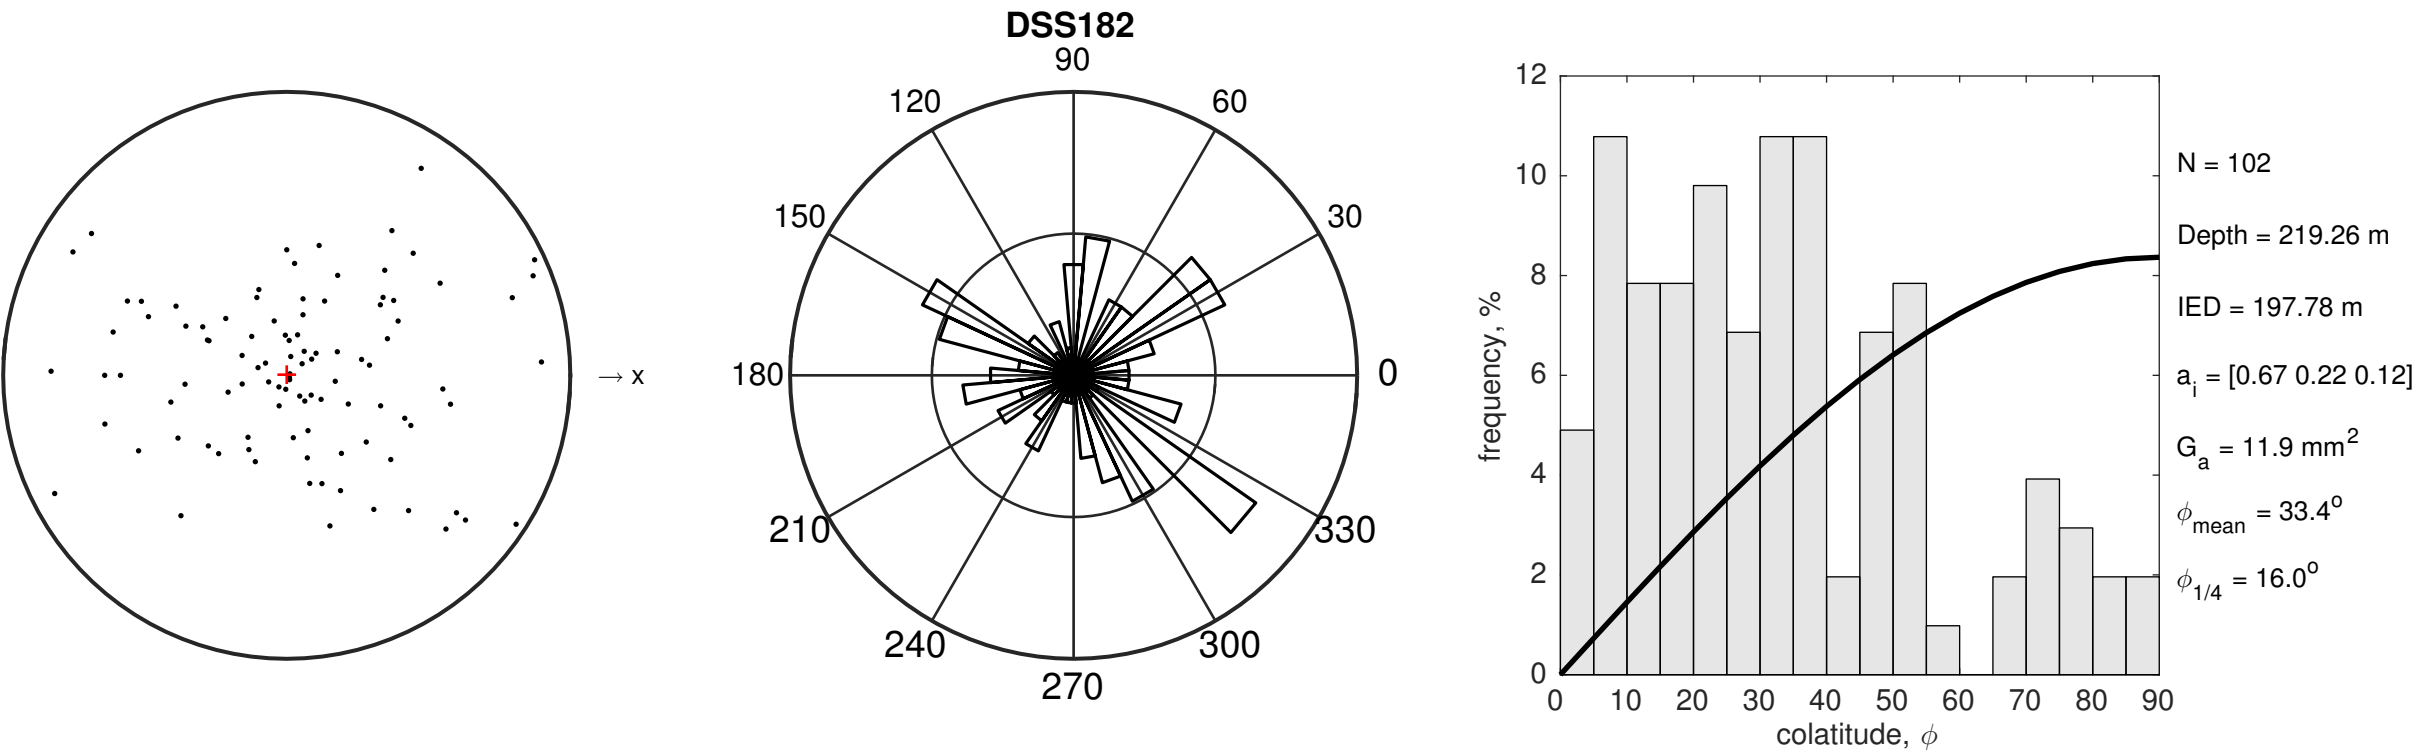

Supplement: Supplementary file 88 [file essd-2015-45-supplement.zip]

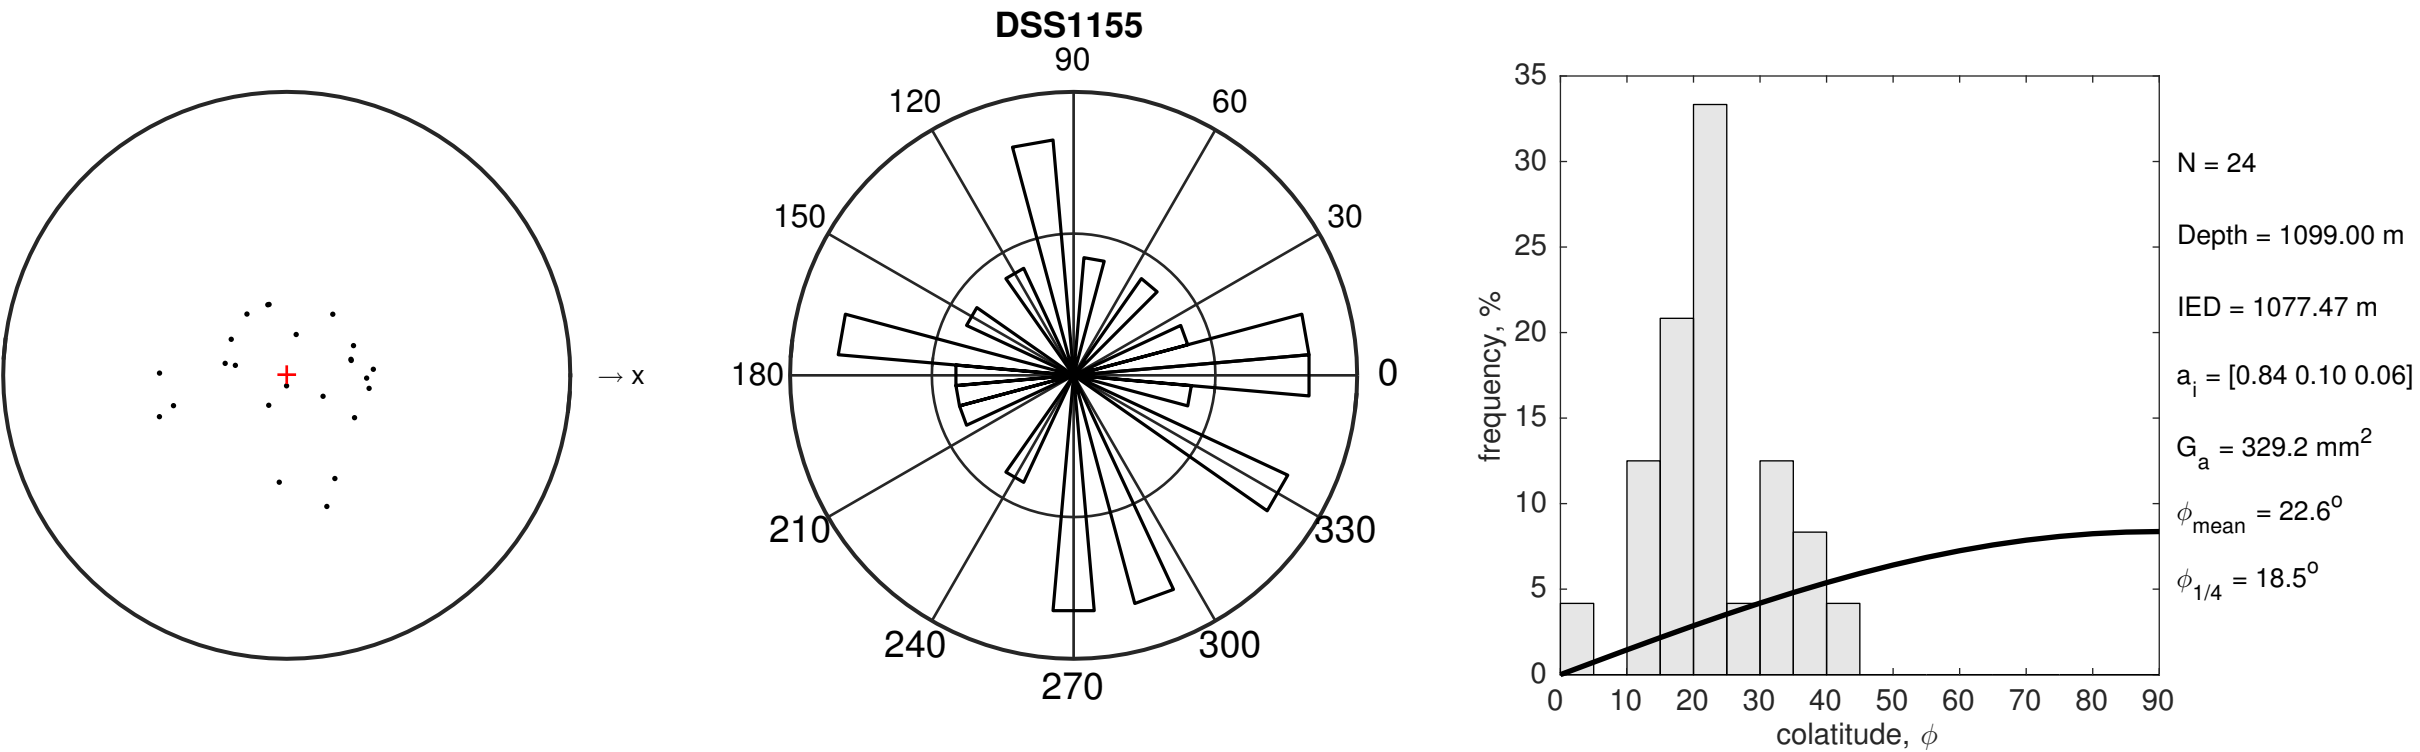

Supplement: Supplementary file 89 [file essd-2015-45-supplement.zip]

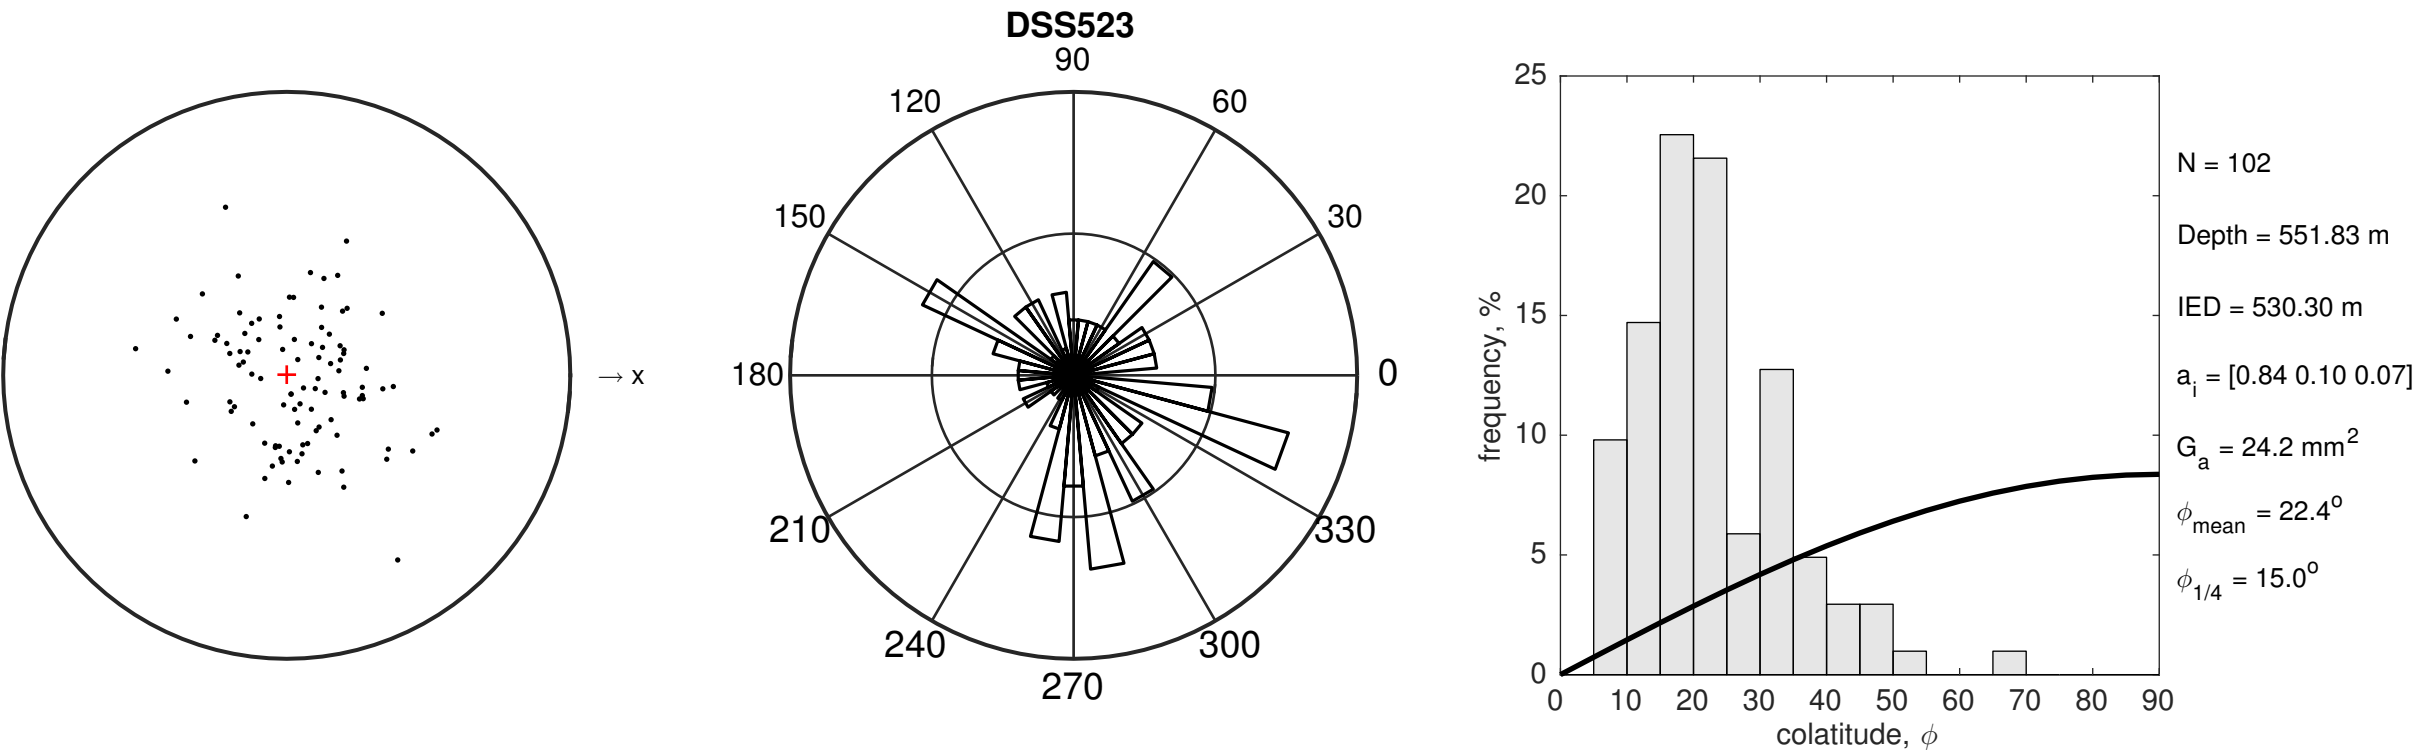

Supplement: Supplementary file 90 [file essd-2015-45-supplement.zip]

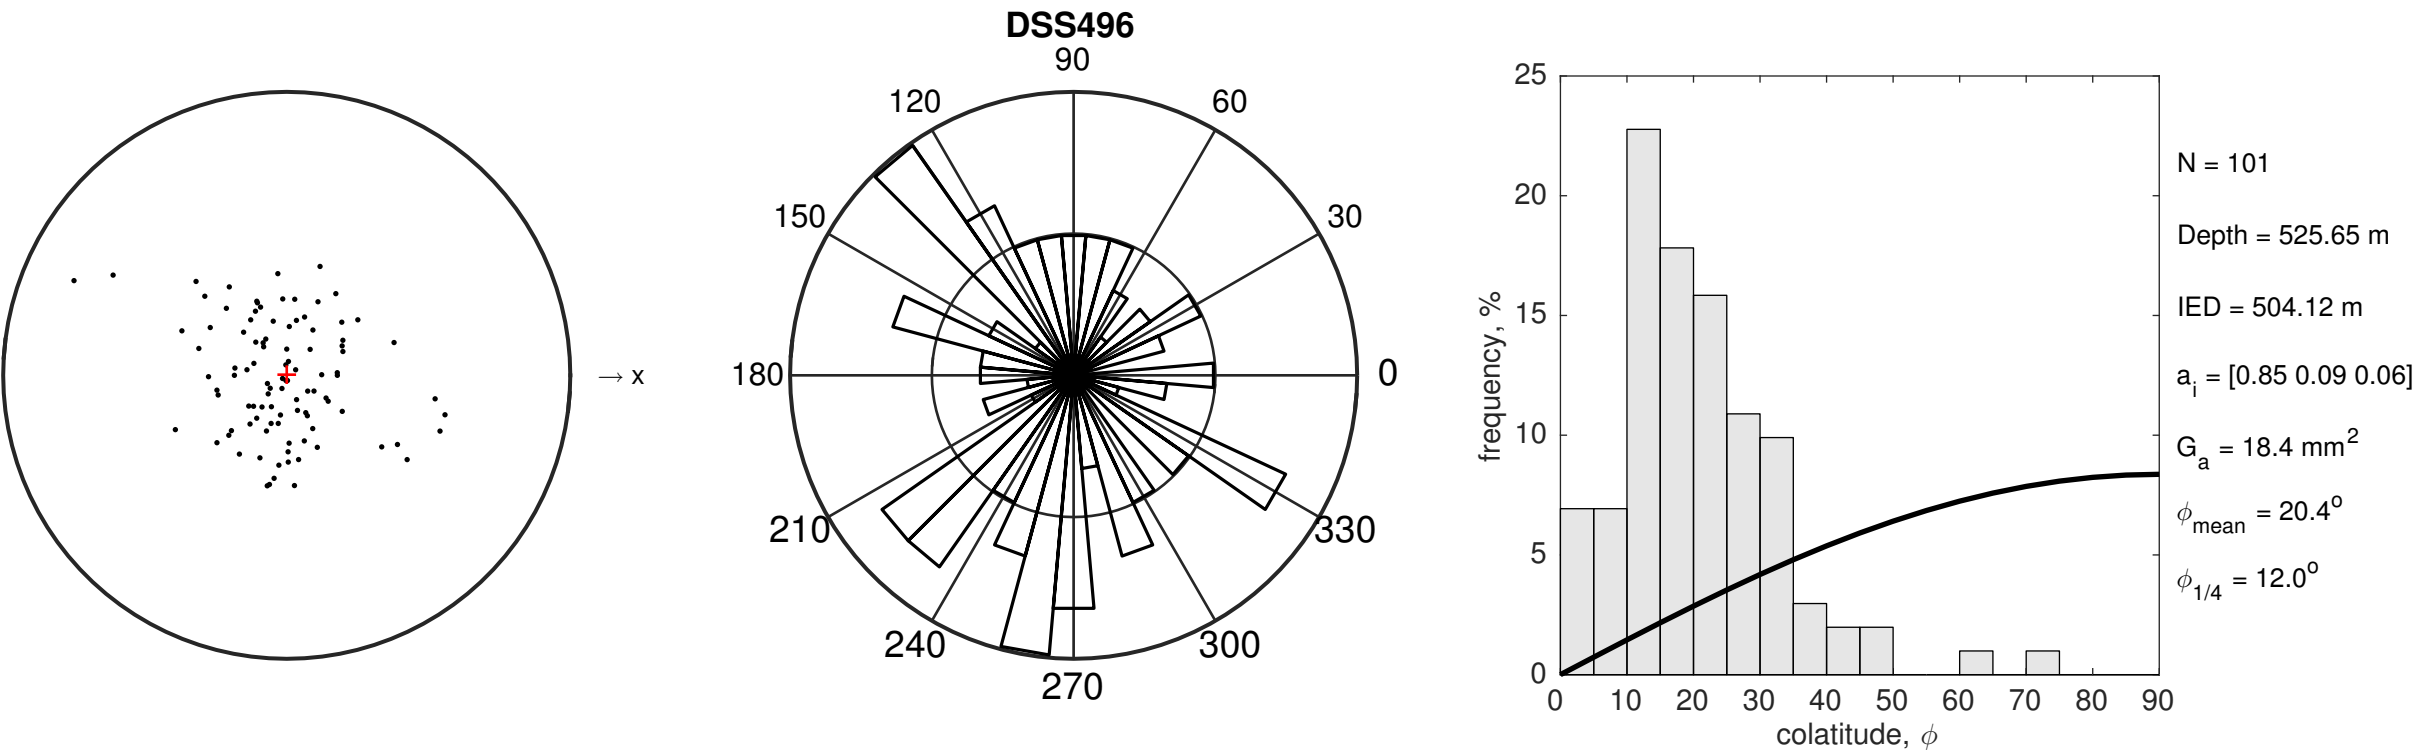

Supplement: Supplementary file 91 [file essd-2015-45-supplement.zip]

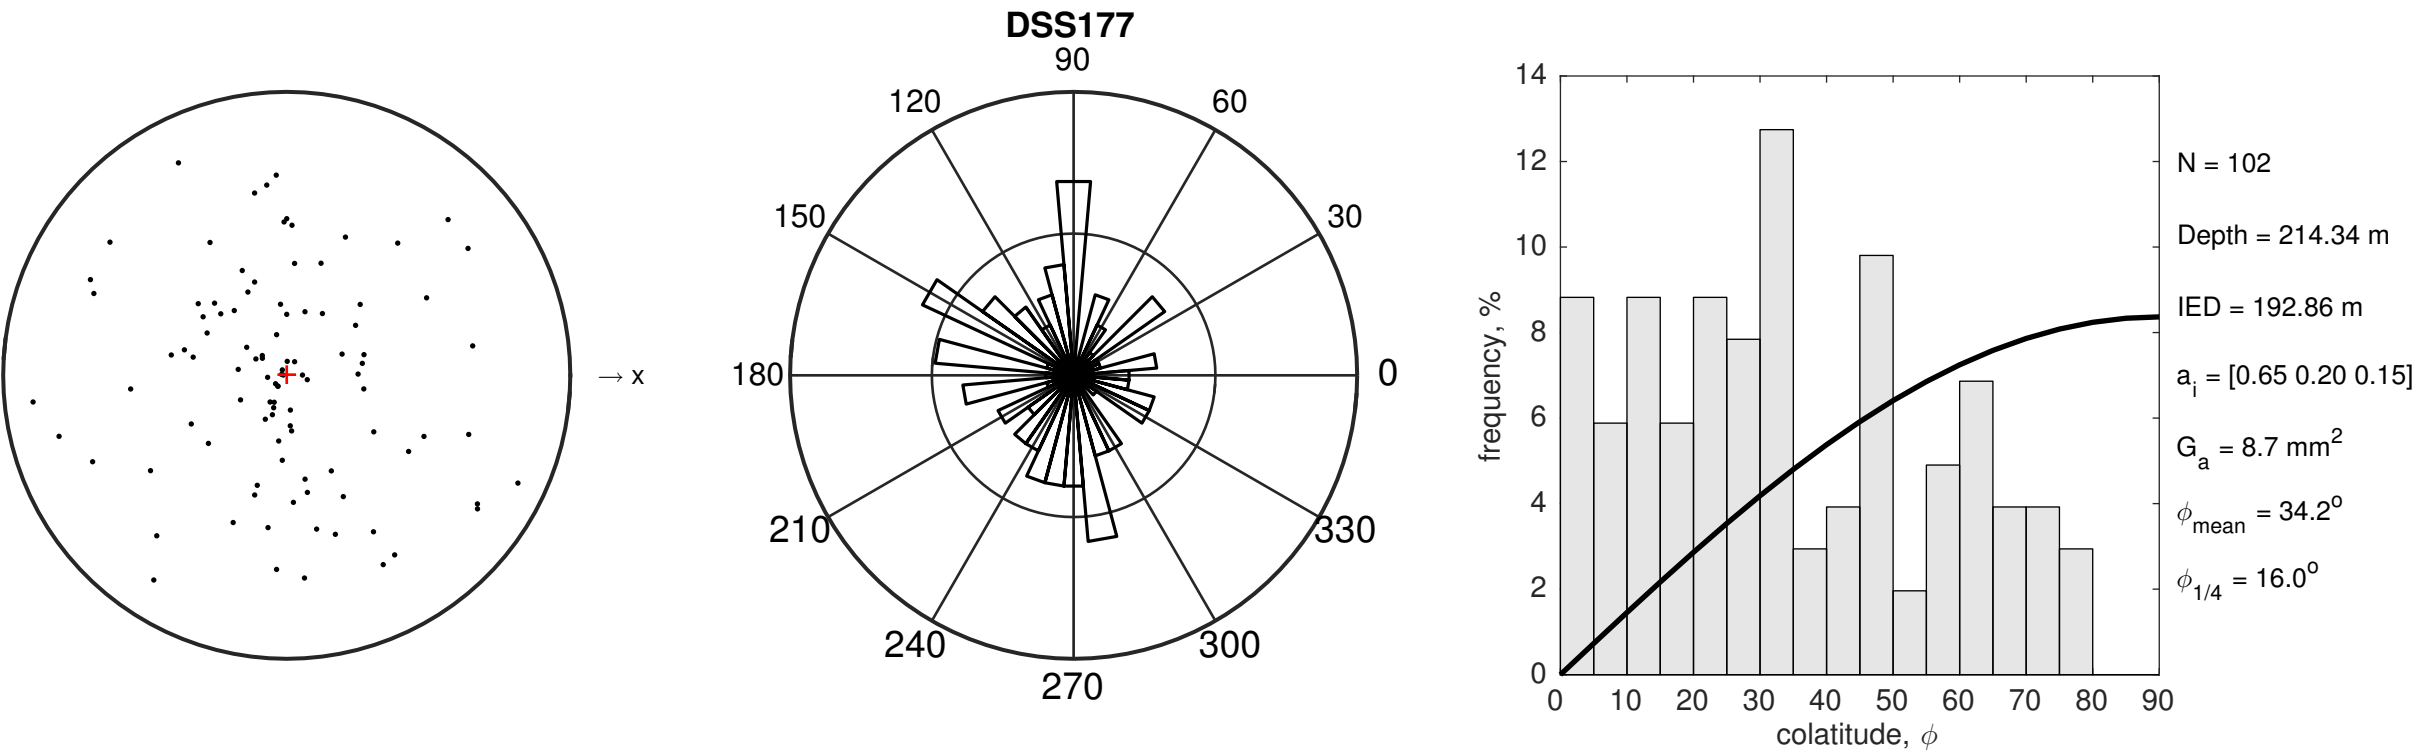

Supplement: Supplementary file 92 [file essd-2015-45-supplement.zip]

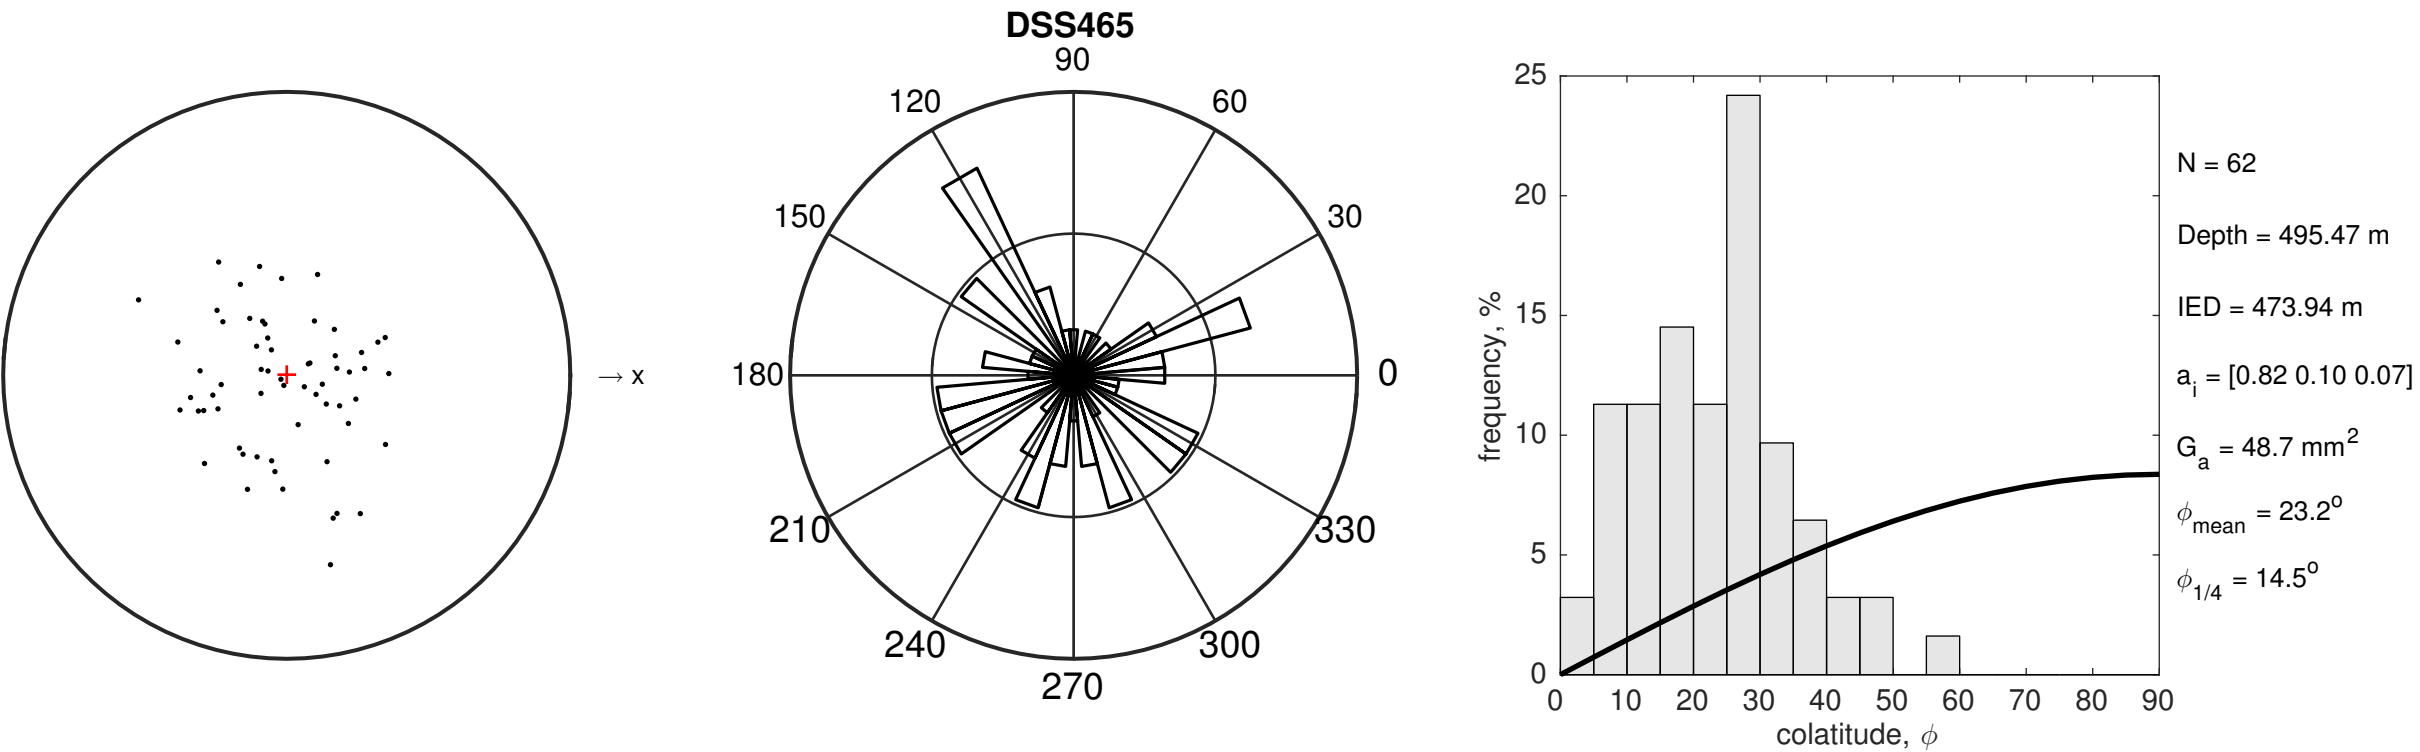

Supplement: Supplementary file 93 [file essd-2015-45-supplement.zip]

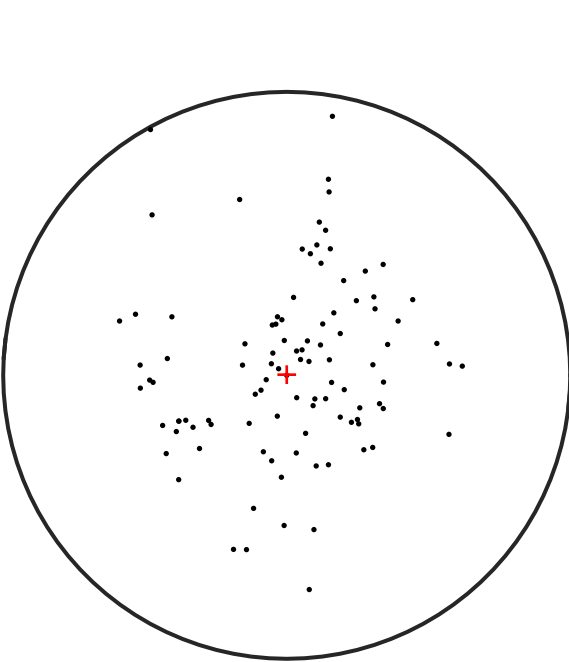

→ x

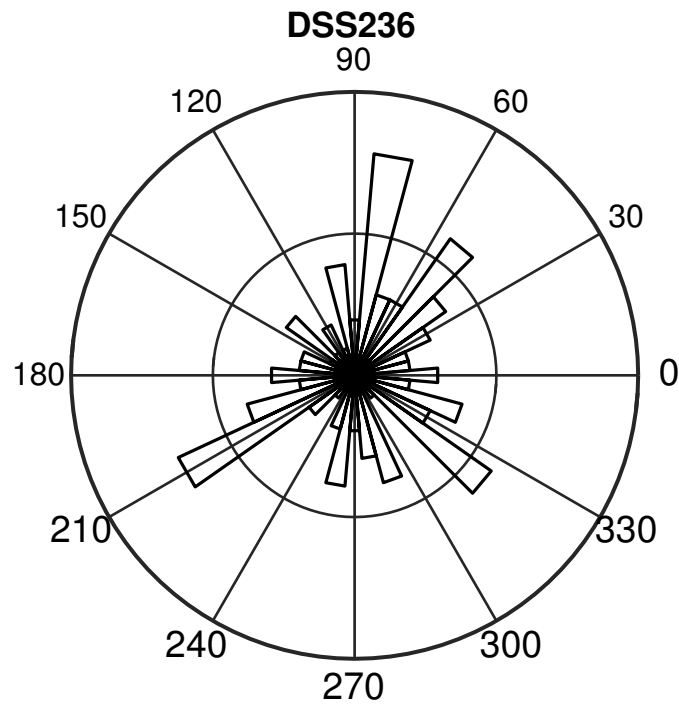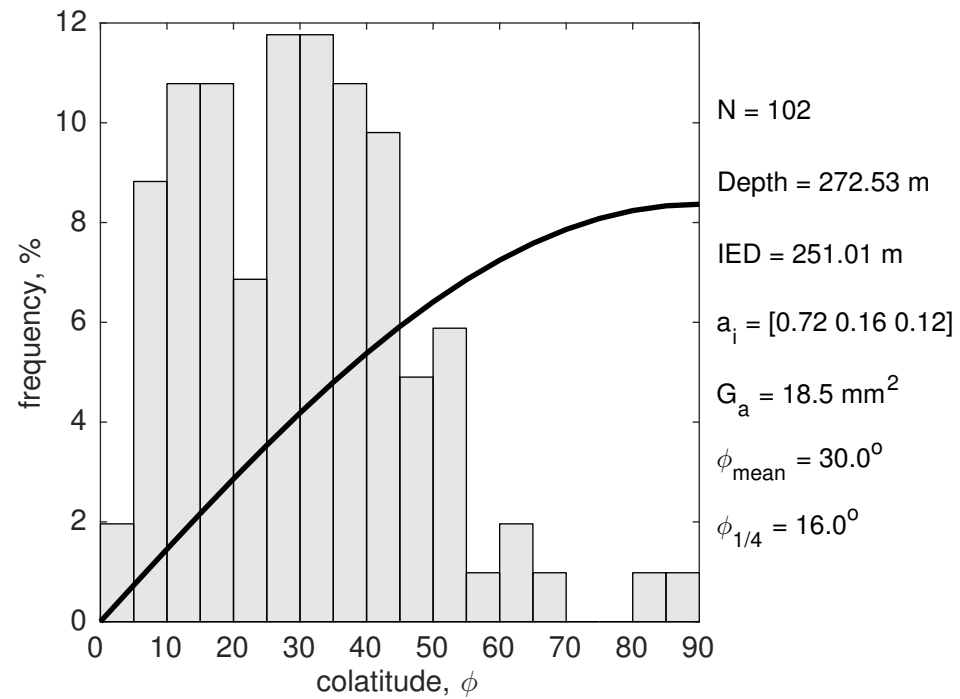

Supplement: Supplementary file 94 [file essd-2015-45-supplement.zip]

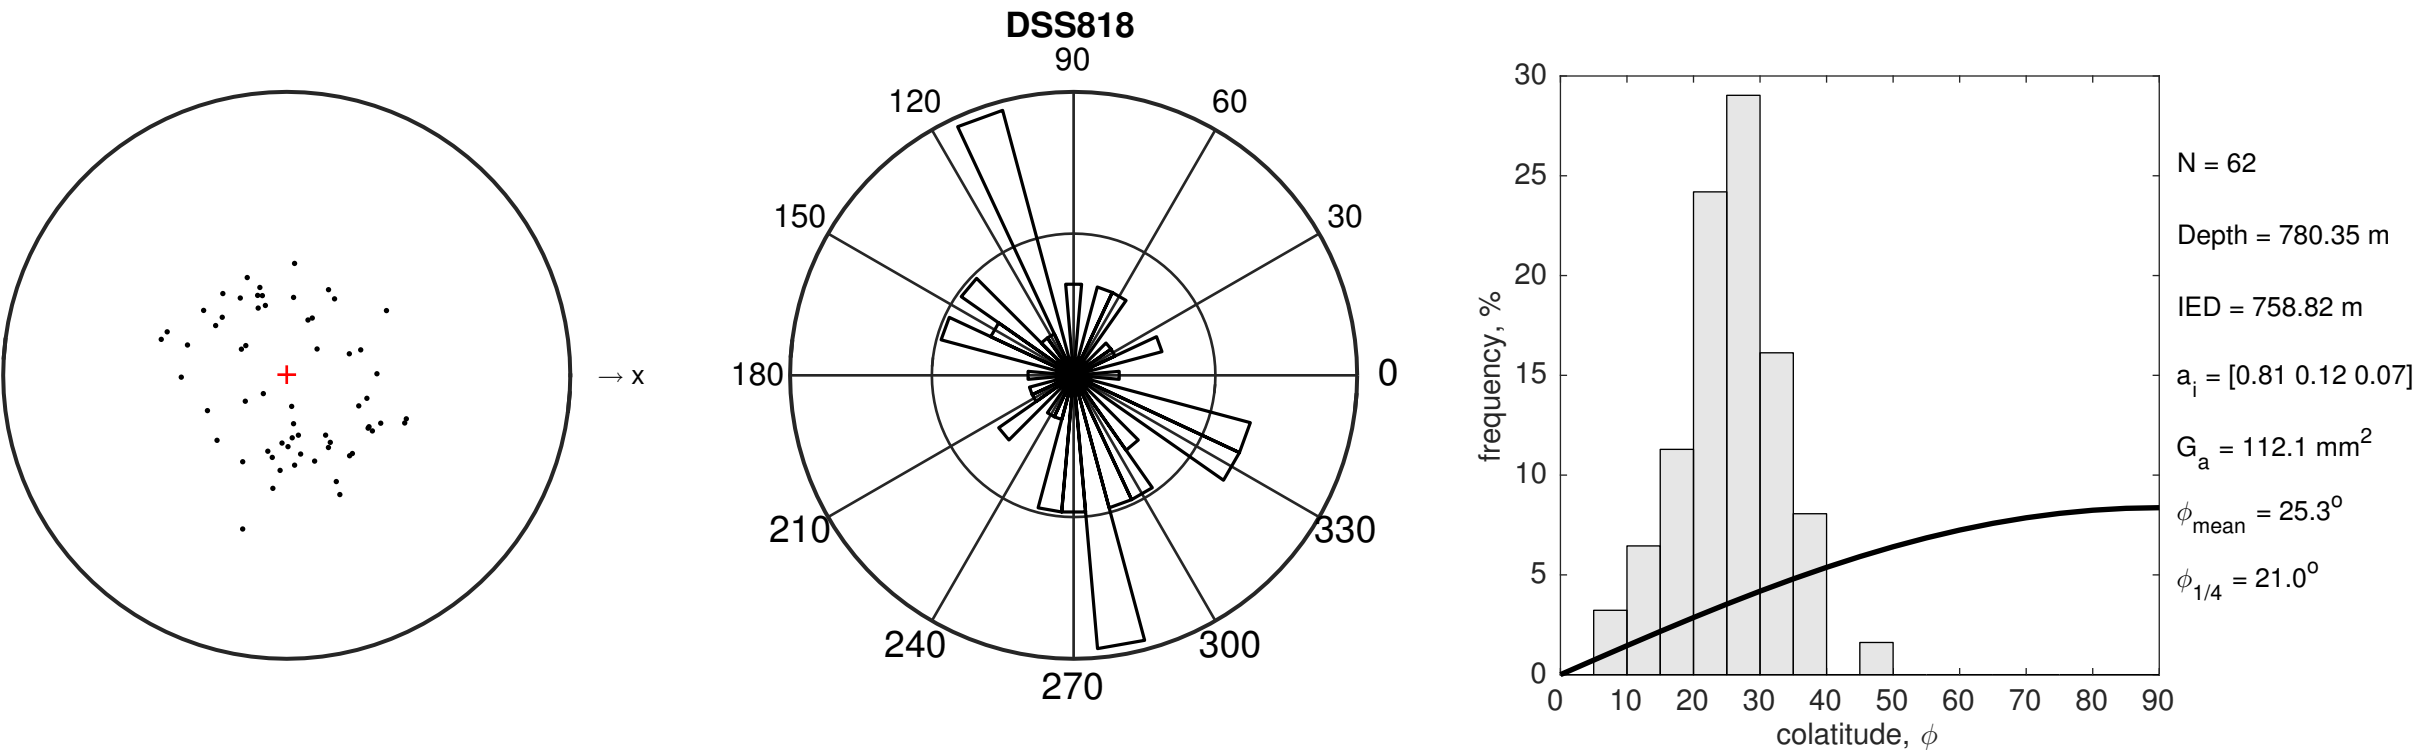

Supplement: Supplementary file 95 [file essd-2015-45-supplement.zip]

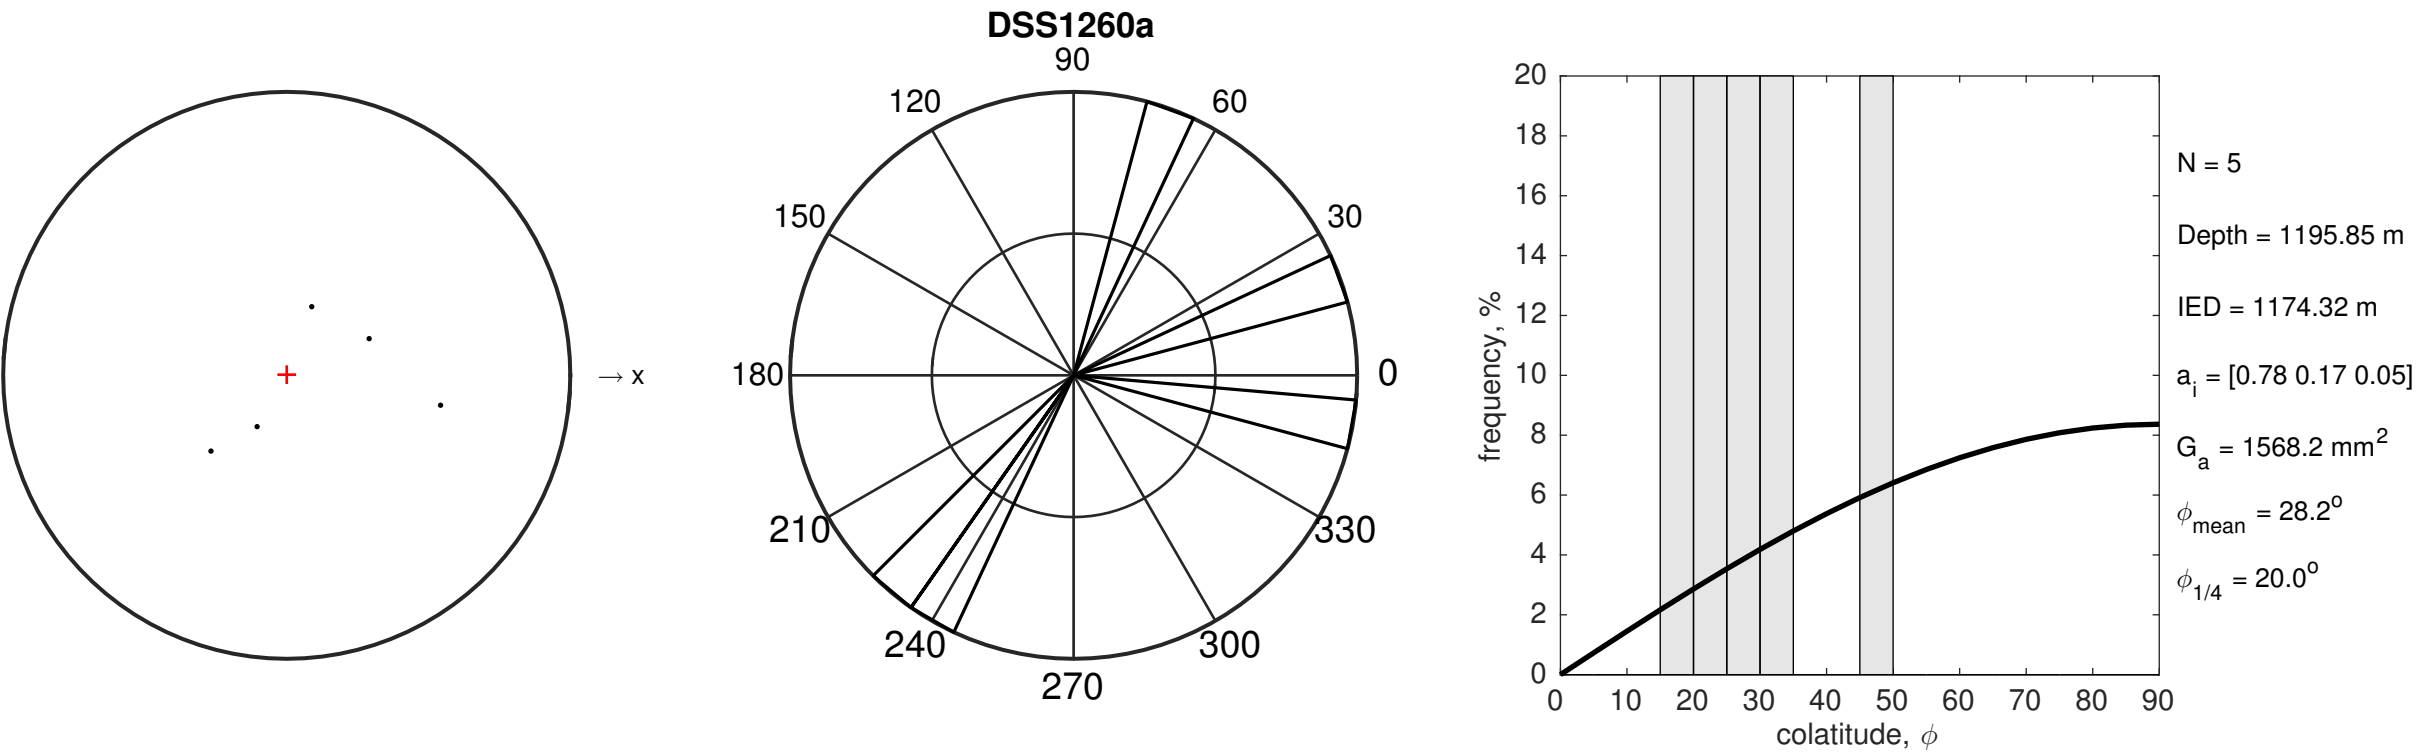

Supplement: Supplementary file 96 [file essd-2015-45-supplement.zip]

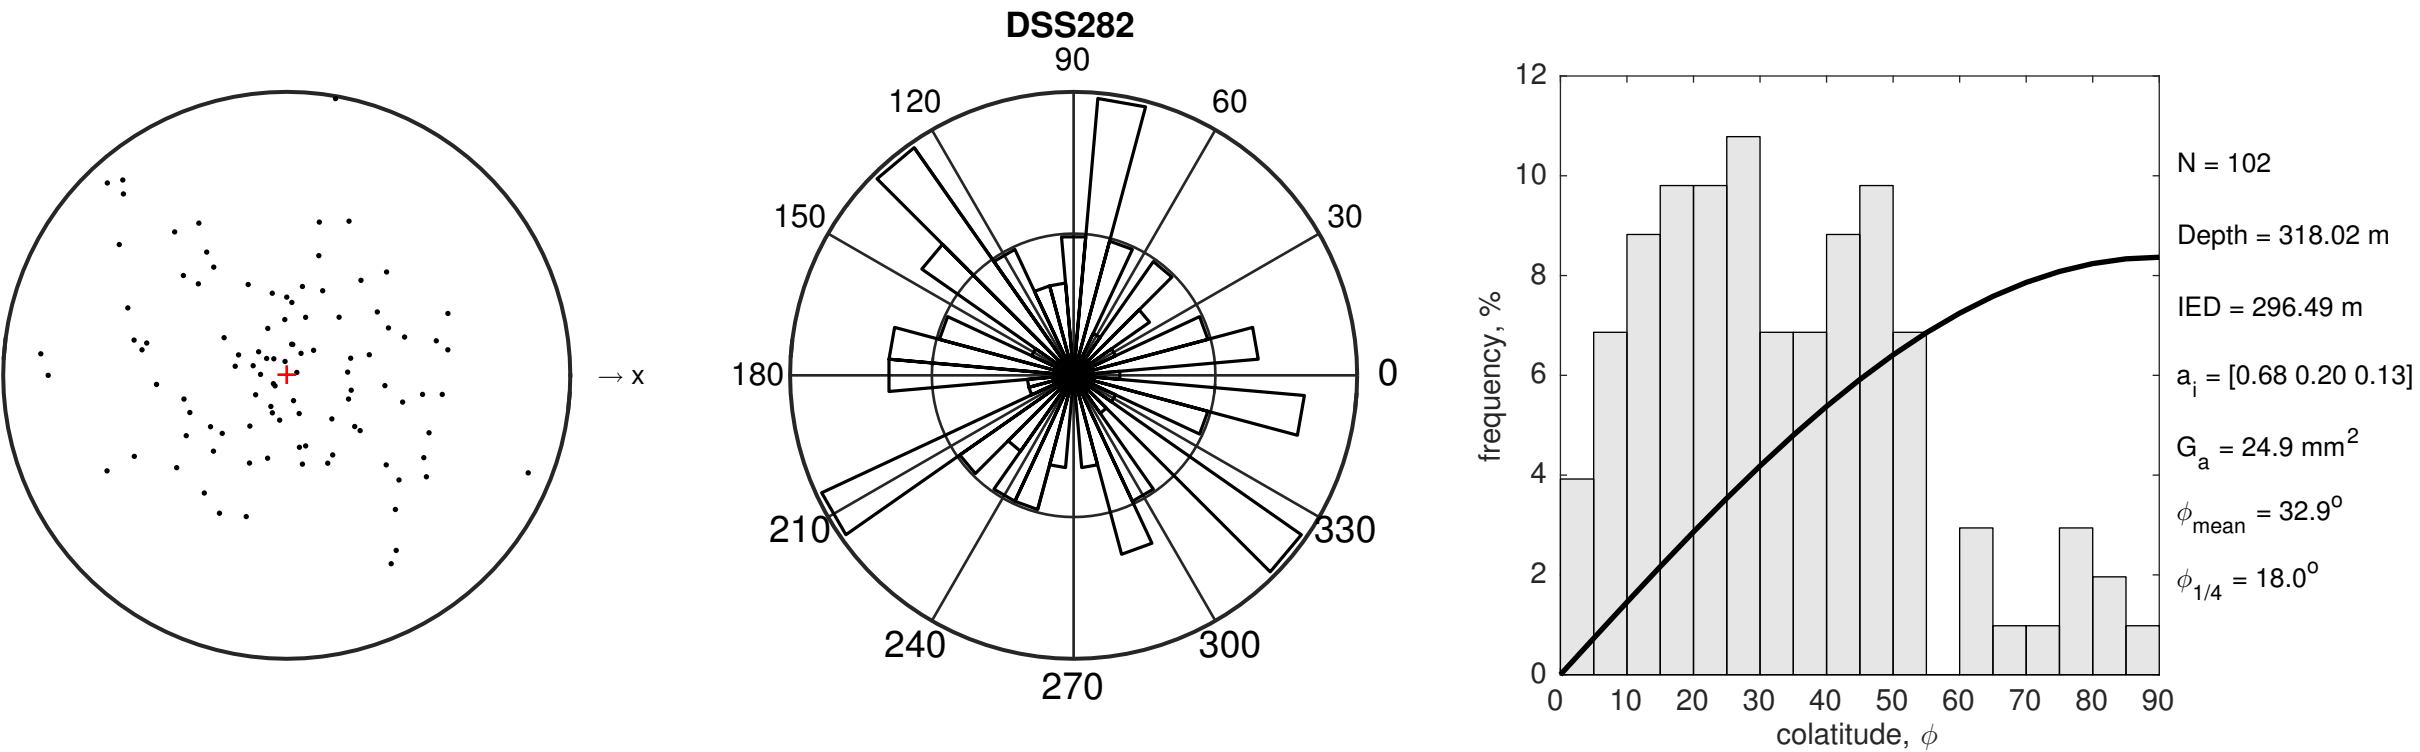

Supplement: Supplementary file 97 [file essd-2015-45-supplement.zip]

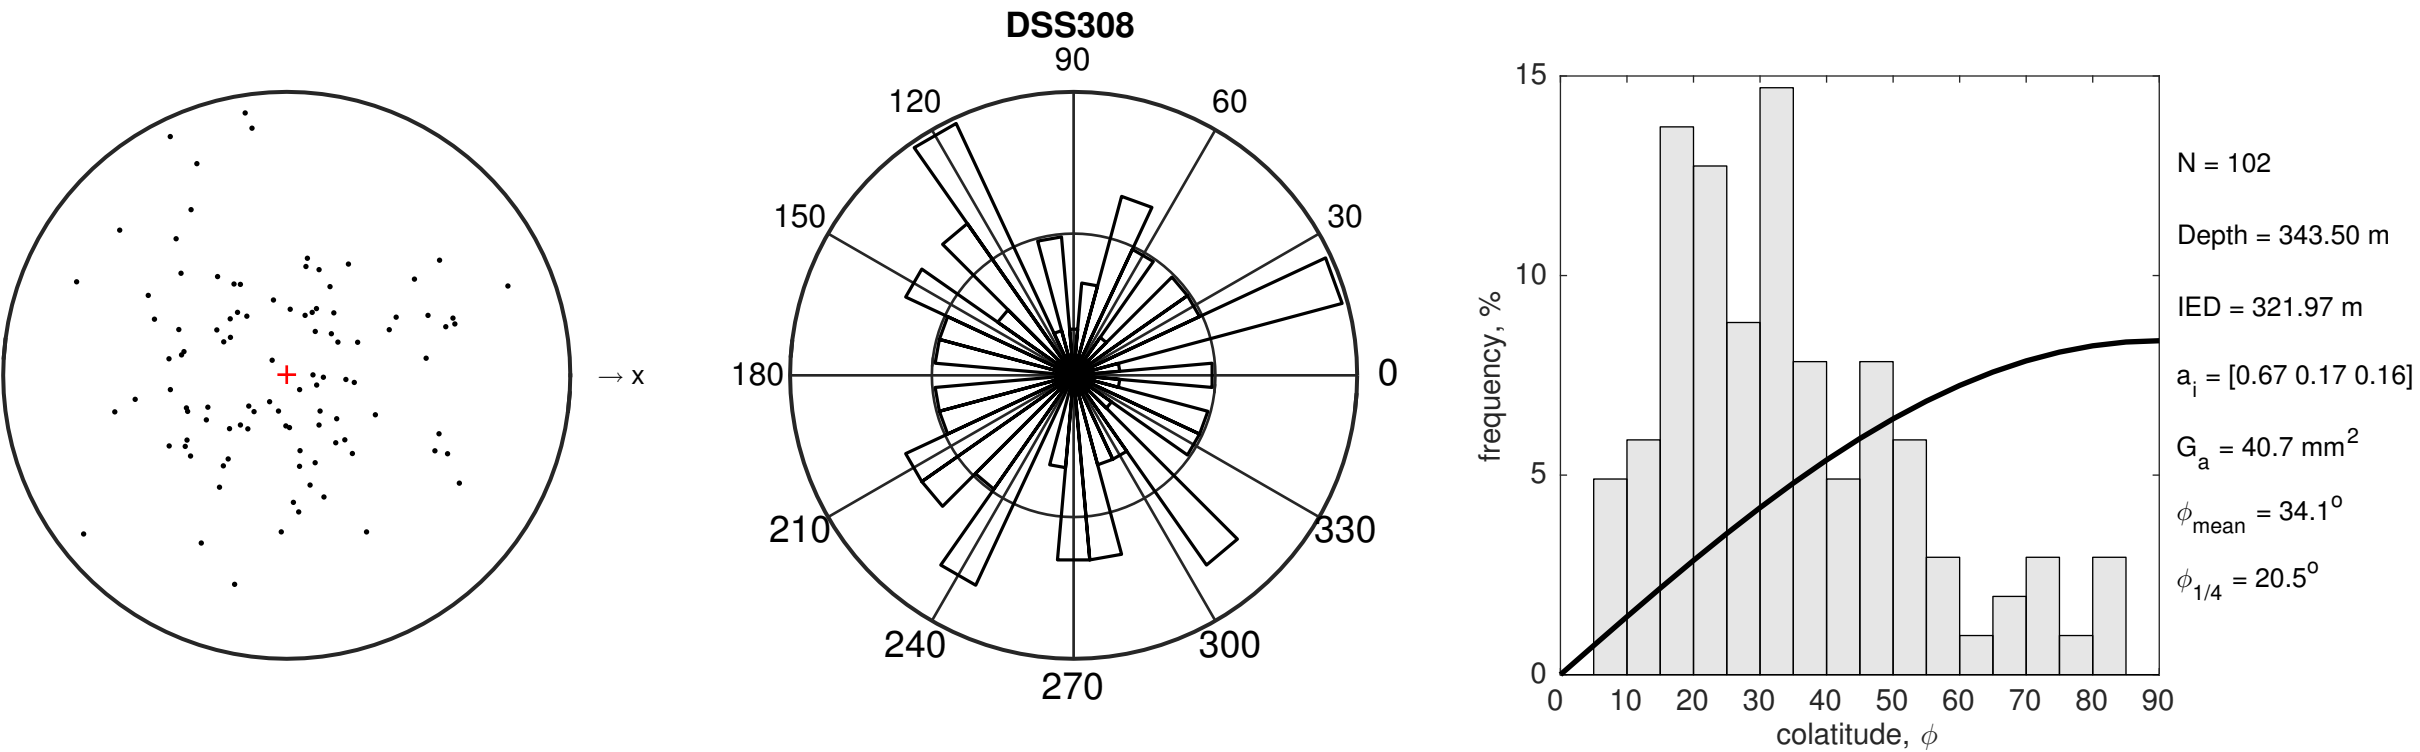

Supplement: Supplementary file 98 [file essd-2015-45-supplement.zip]

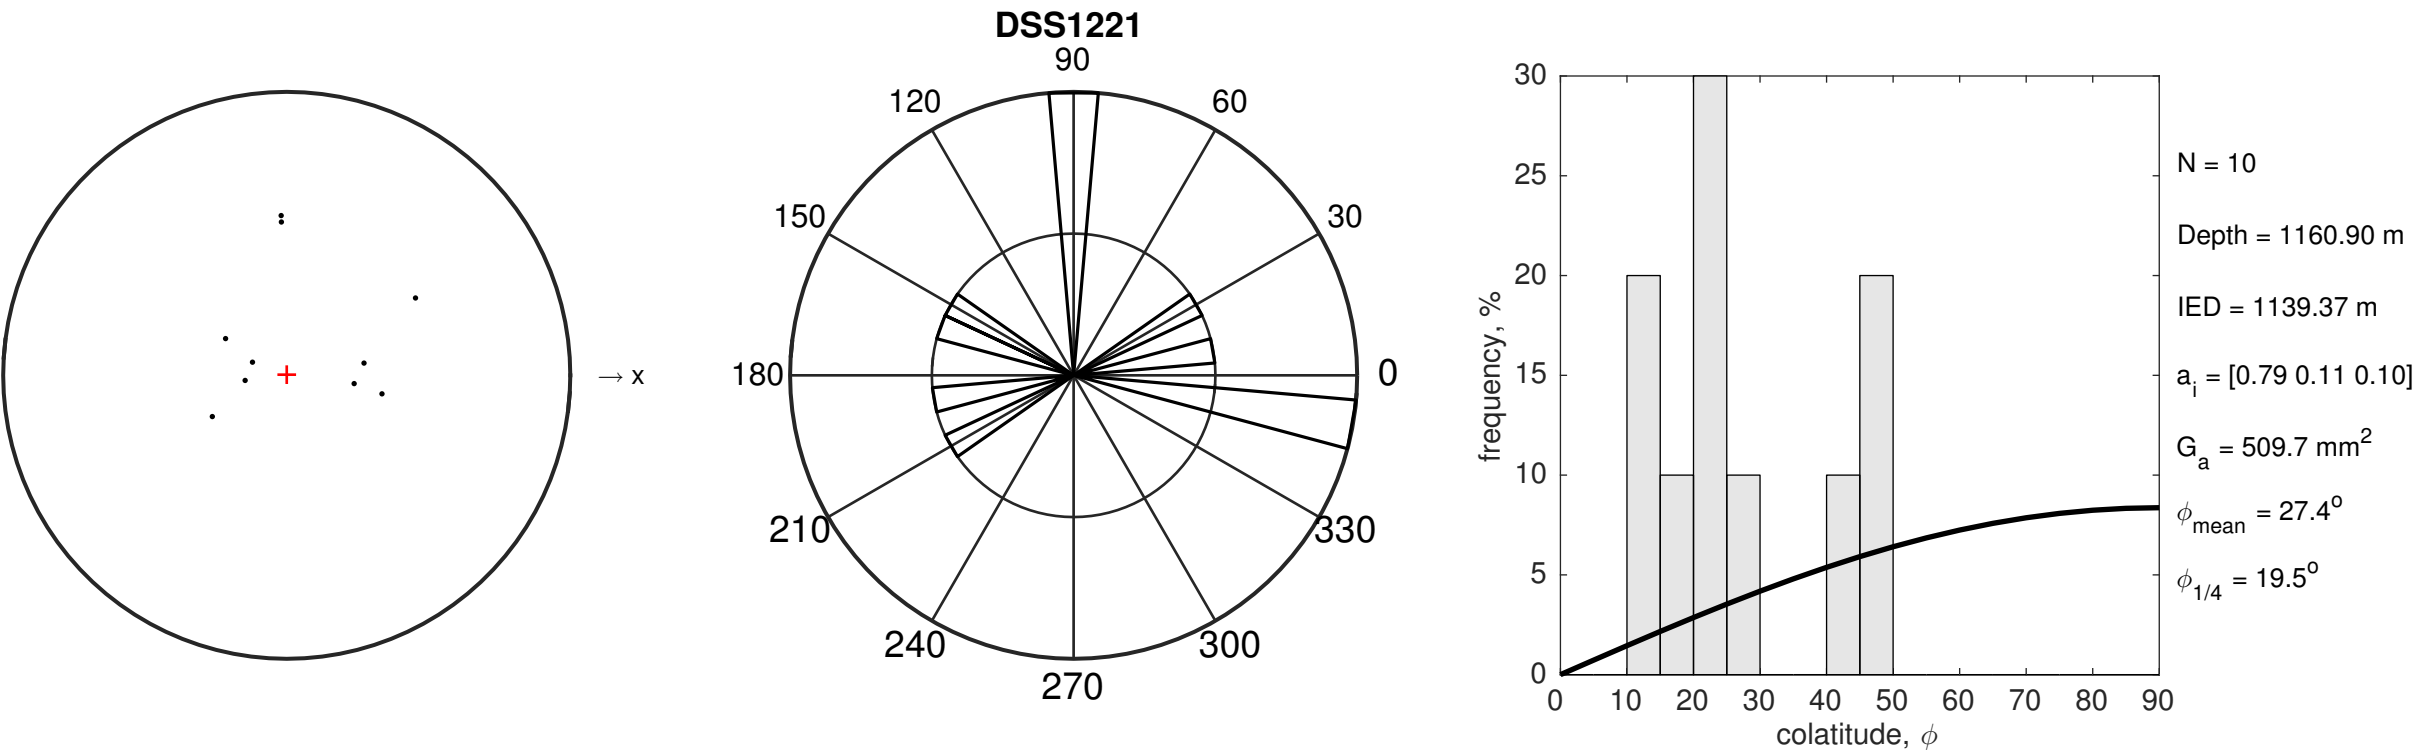

Supplement: Supplementary file 99 [file essd-2015-45-supplement.zip]

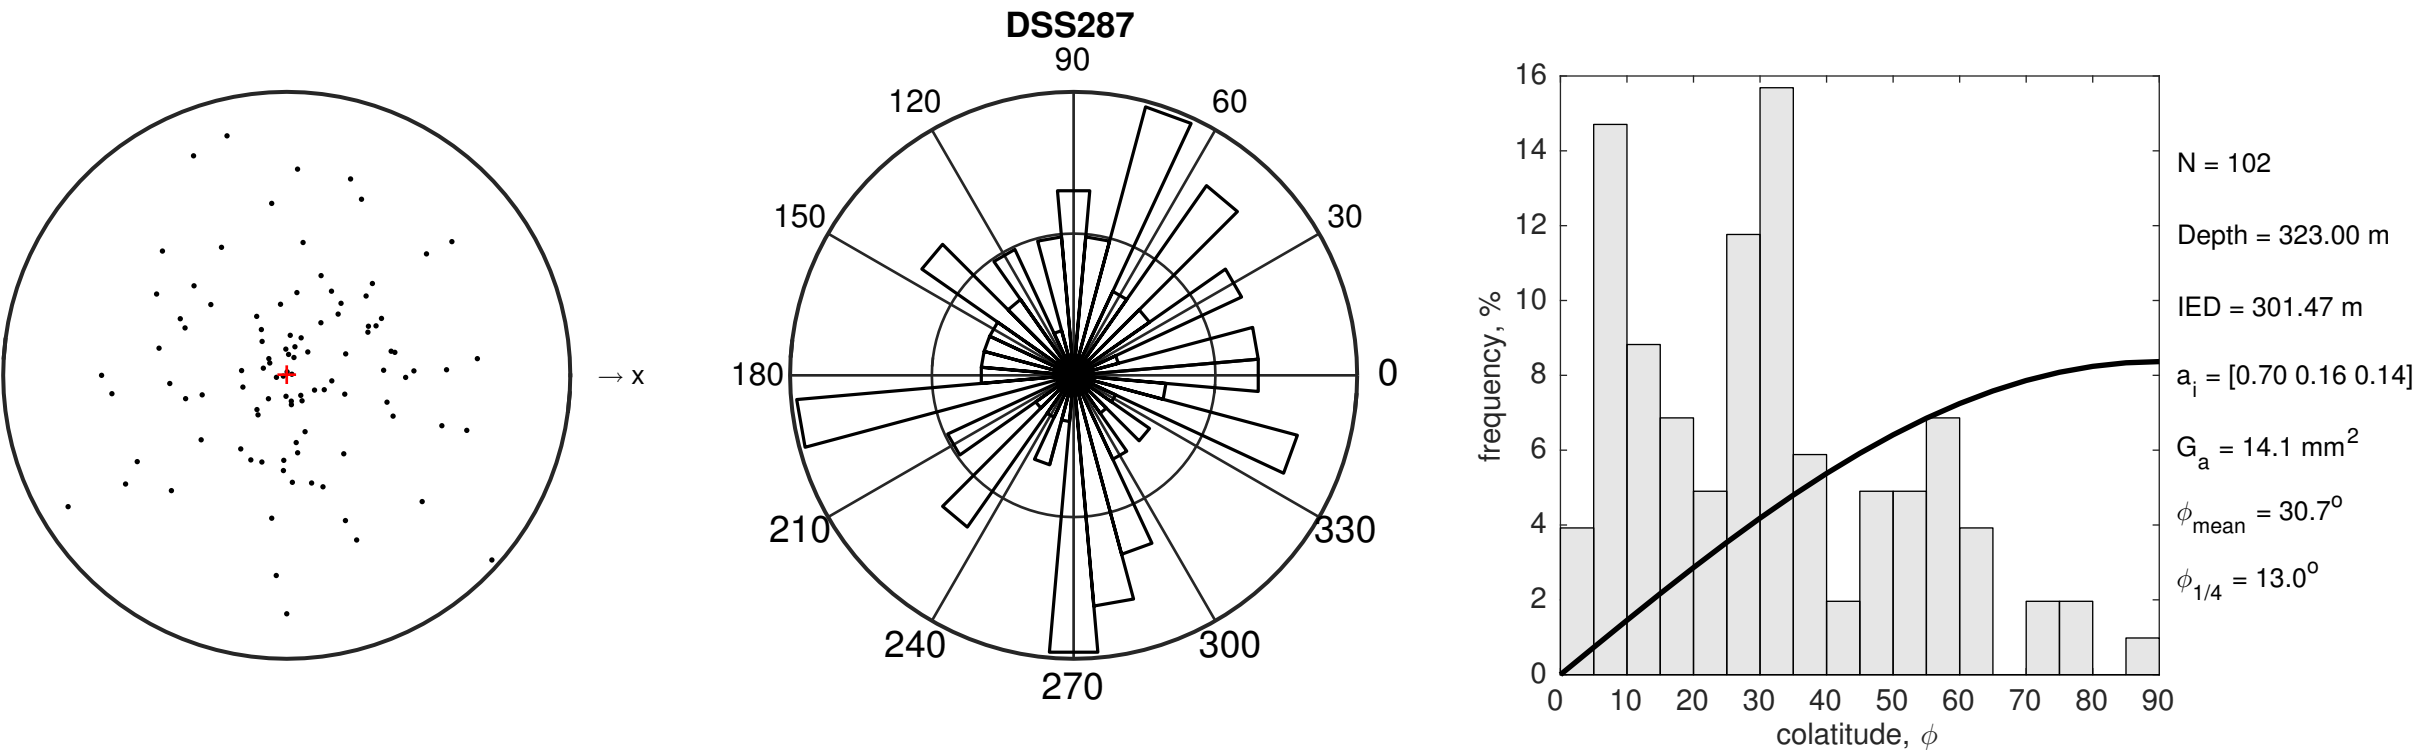

Supplement: Supplementary file 100 [file essd-2015-45-supplement.zip]
