# Supplementary figures and images for: Ice crystal c-axis orientation and mean grain size measurements from the Dome Summit South ice core, Law Dome, East Antarctica (part 2 of 2)
Source: Copernicus journal article supplement (doi:10.5194/essd-2015-45), 2016-01-19

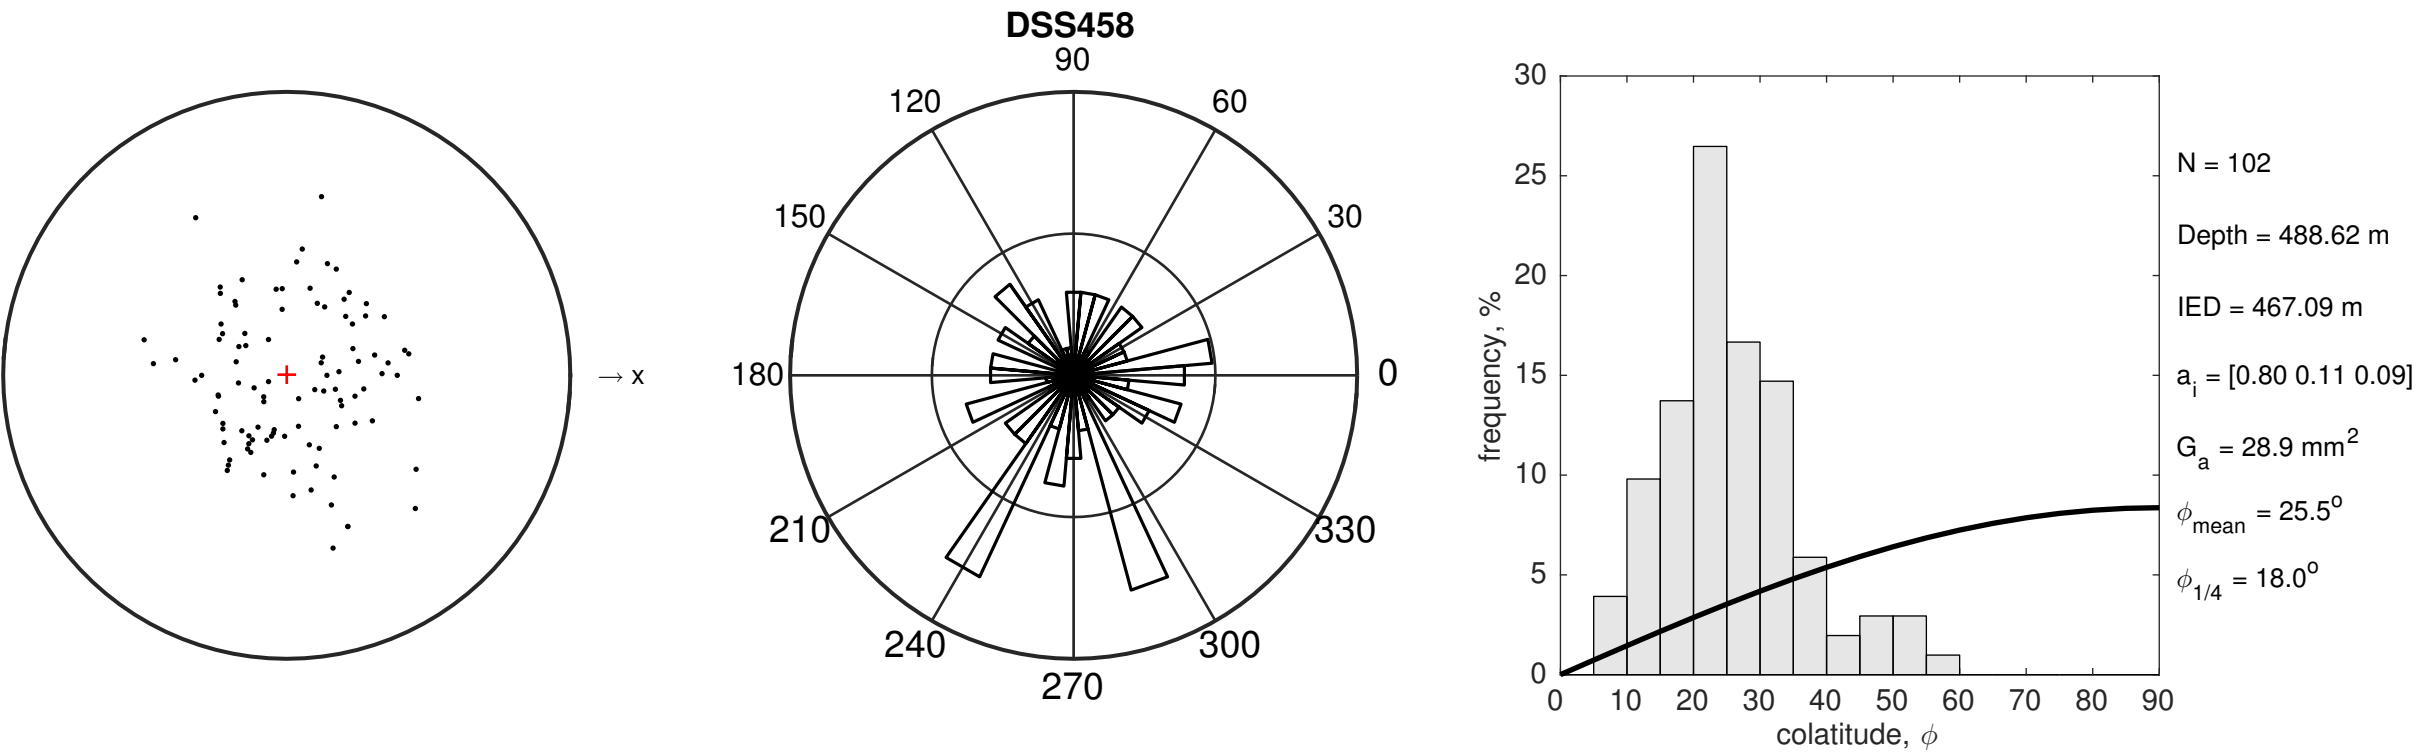

Supplement: Supplementary file 101 [file essd-2015-45-supplement.zip]

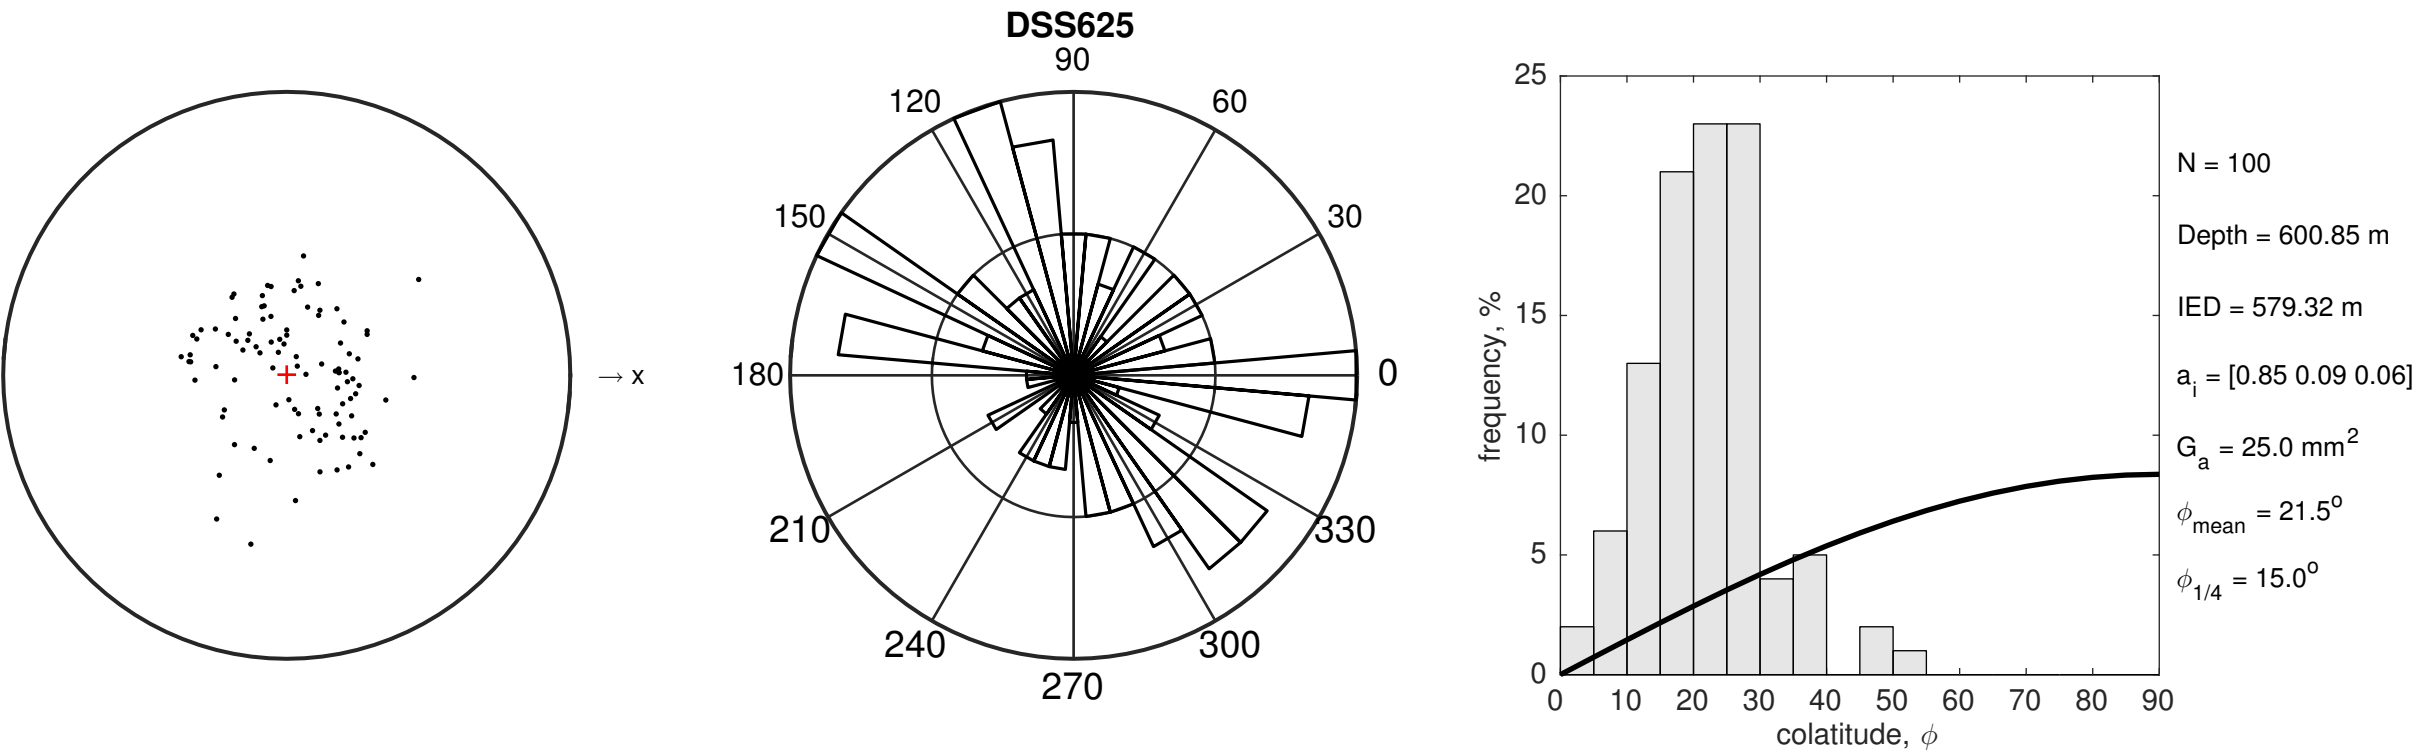

Supplement: Supplementary file 102 [file essd-2015-45-supplement.zip]

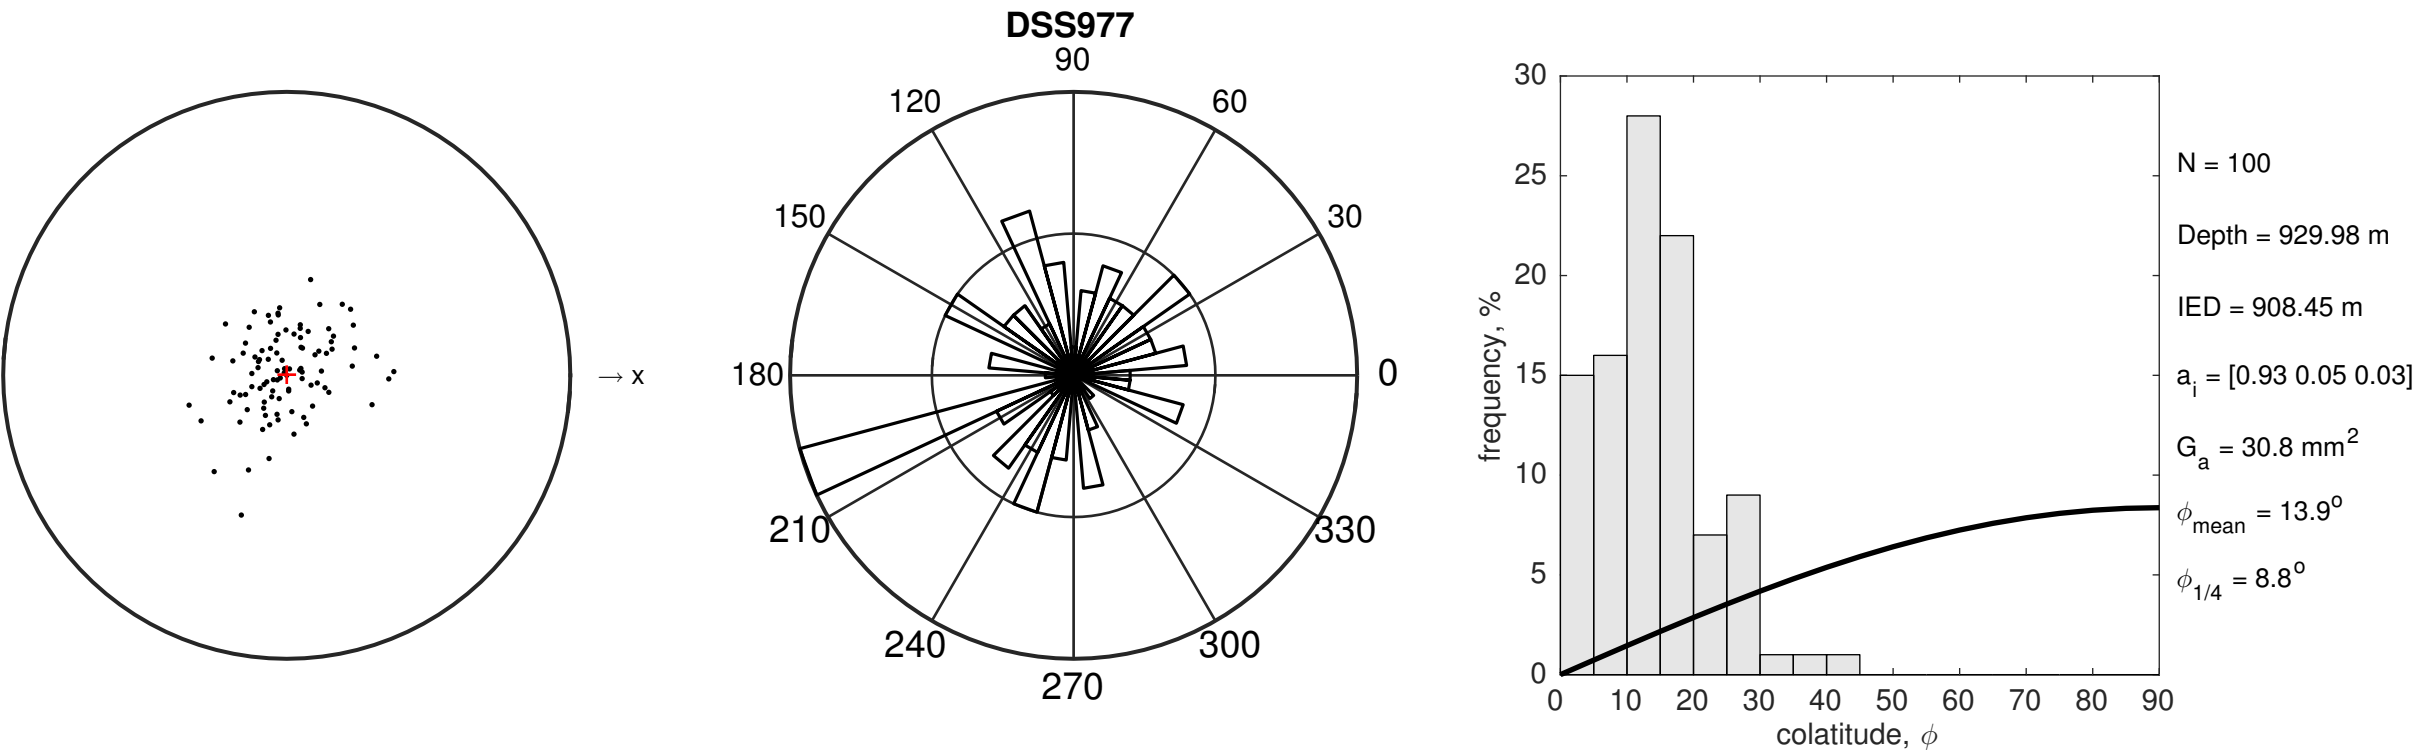

Supplement: Supplementary file 103 [file essd-2015-45-supplement.zip]

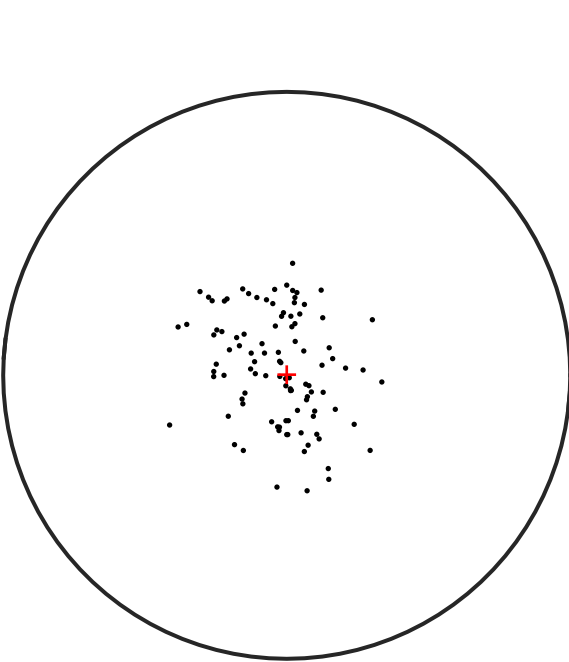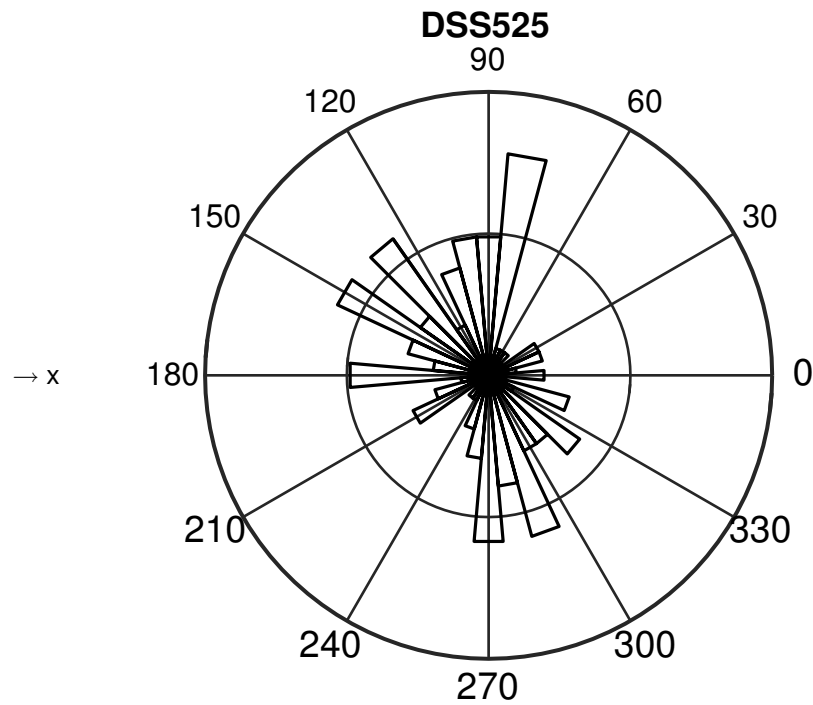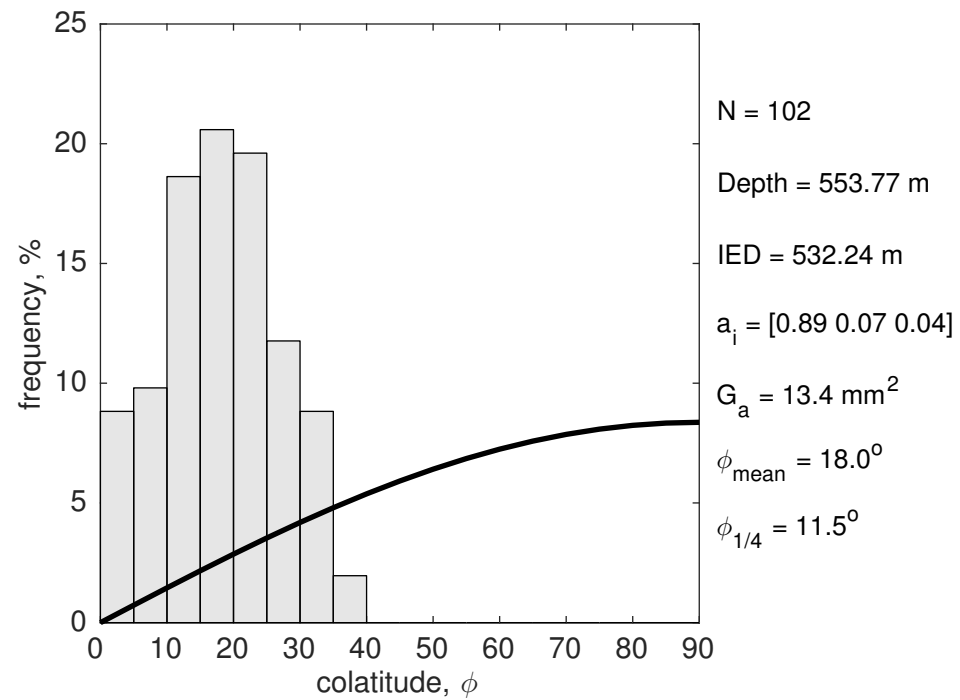

Supplement: Supplementary file 104 [file essd-2015-45-supplement.zip]

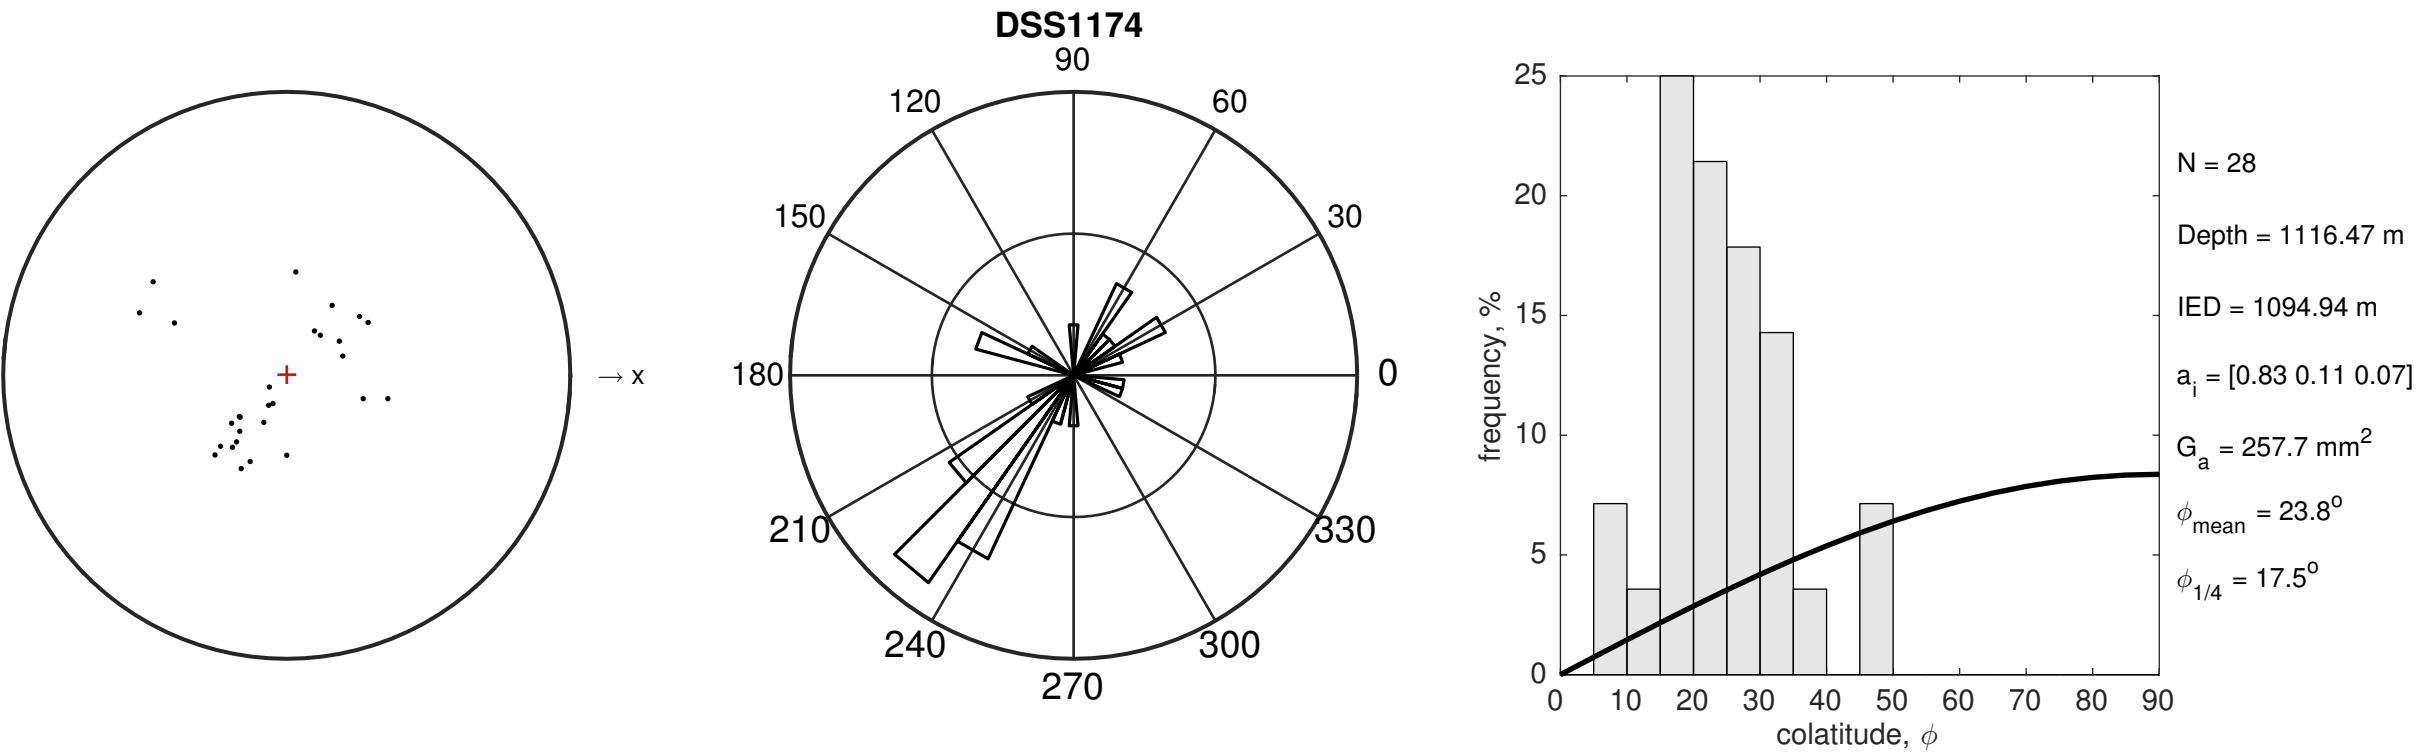

Supplement: Supplementary file 105 [file essd-2015-45-supplement.zip]

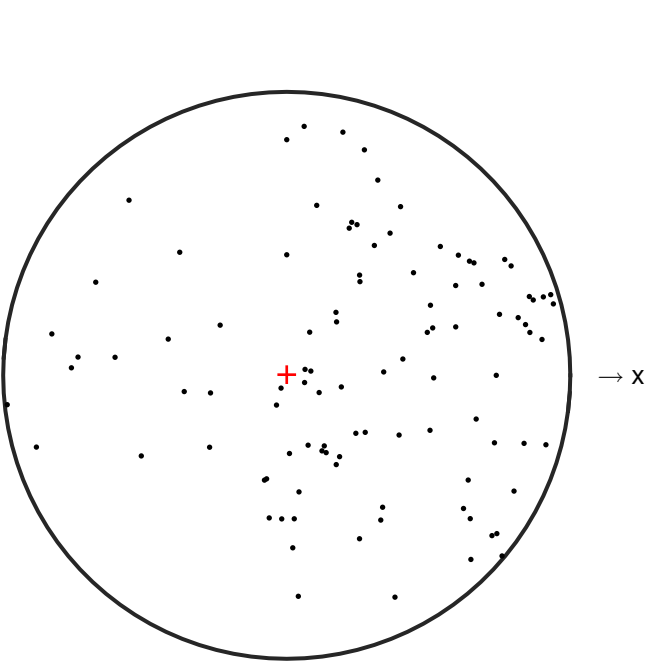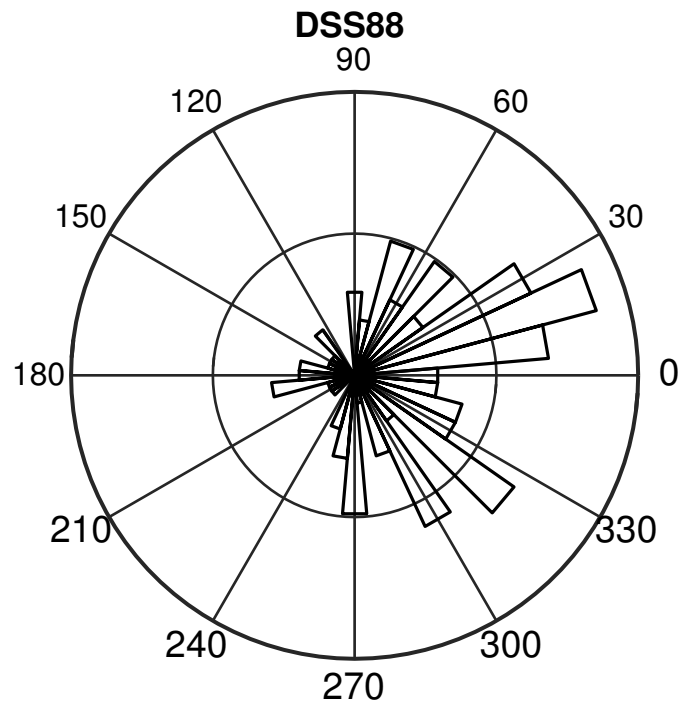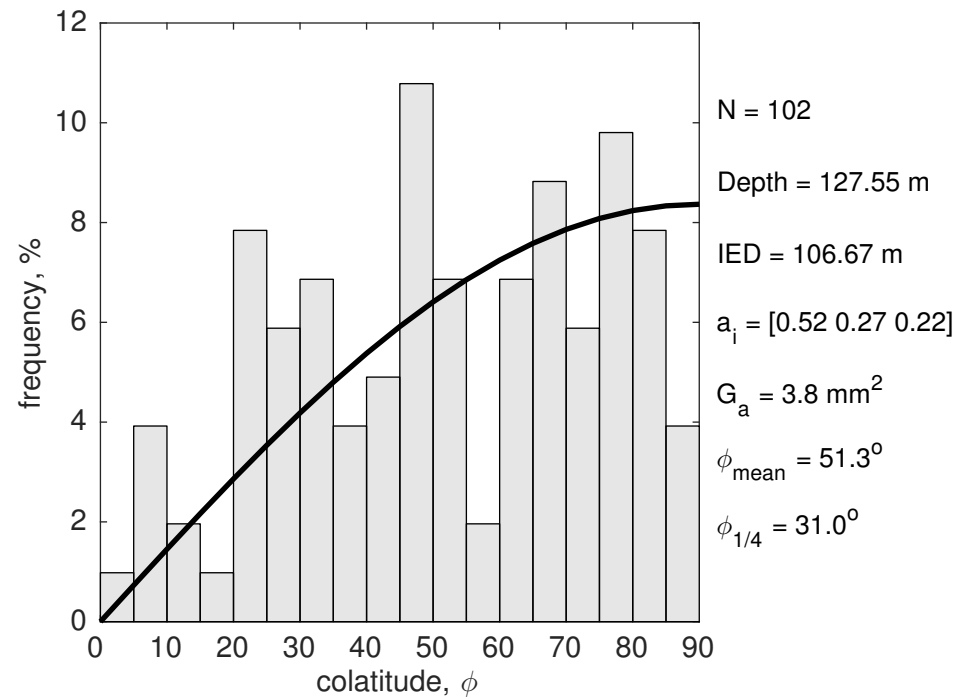

Supplement: Supplementary file 106 [file essd-2015-45-supplement.zip]

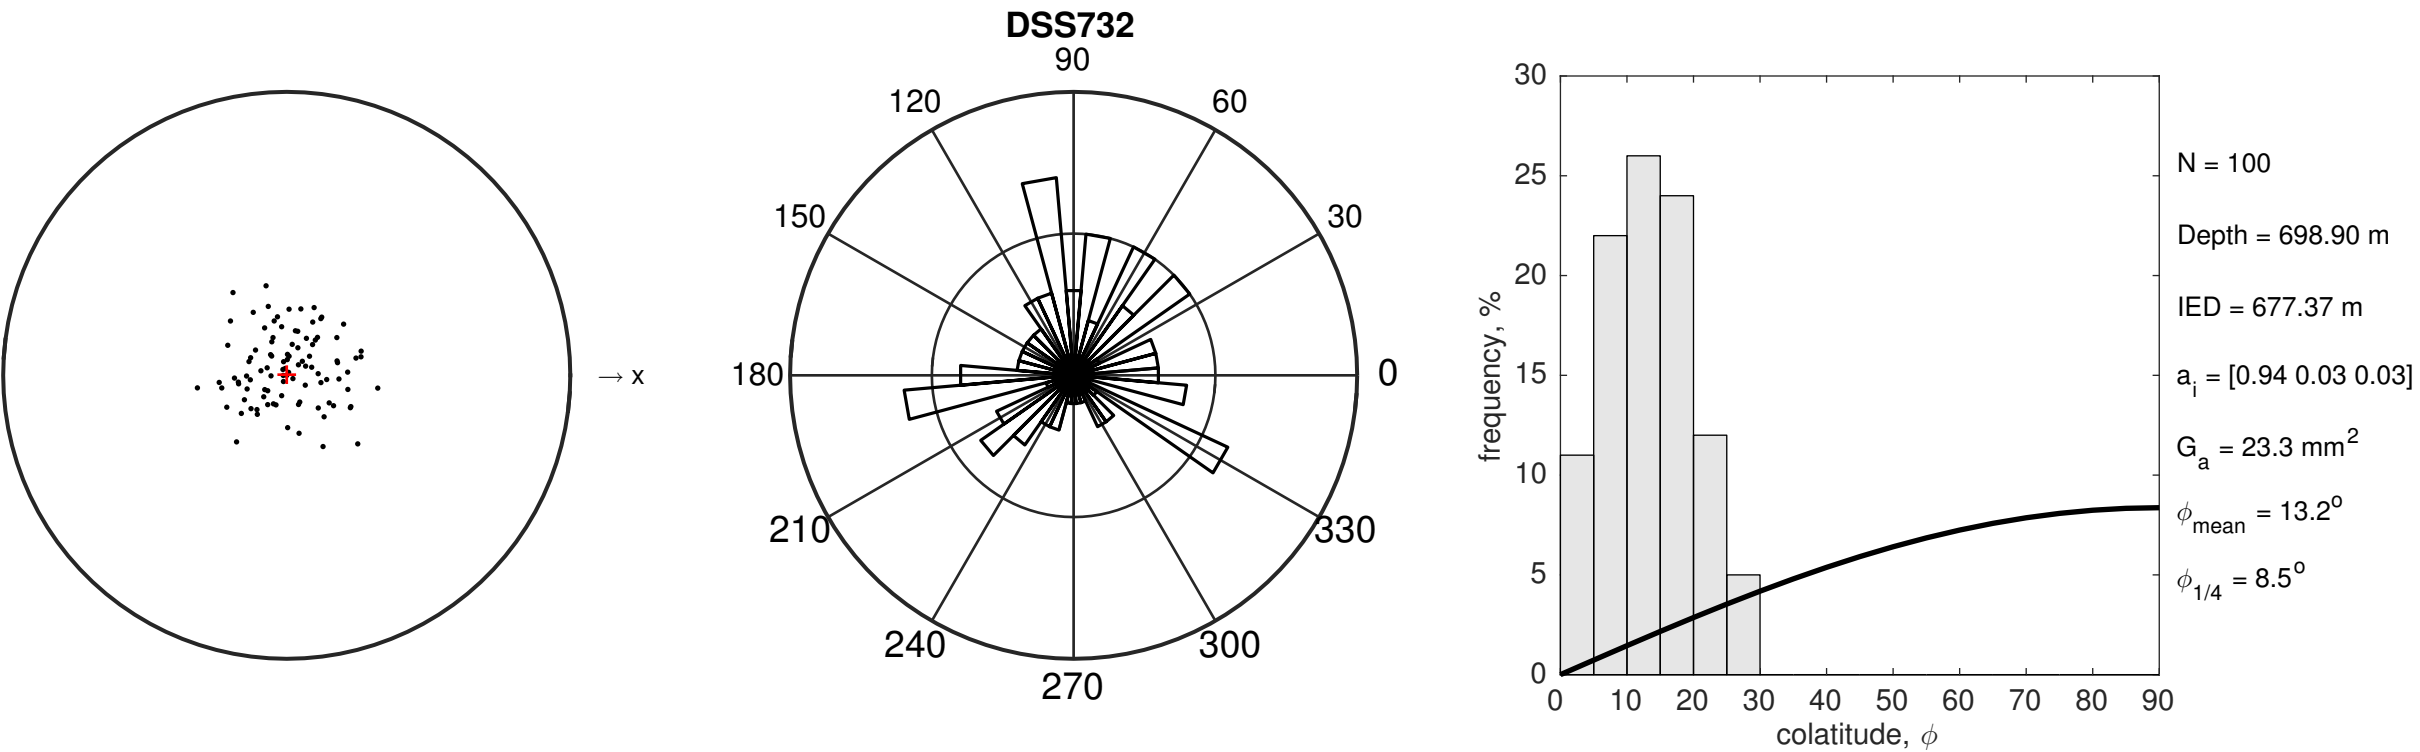

Supplement: Supplementary file 107 [file essd-2015-45-supplement.zip]

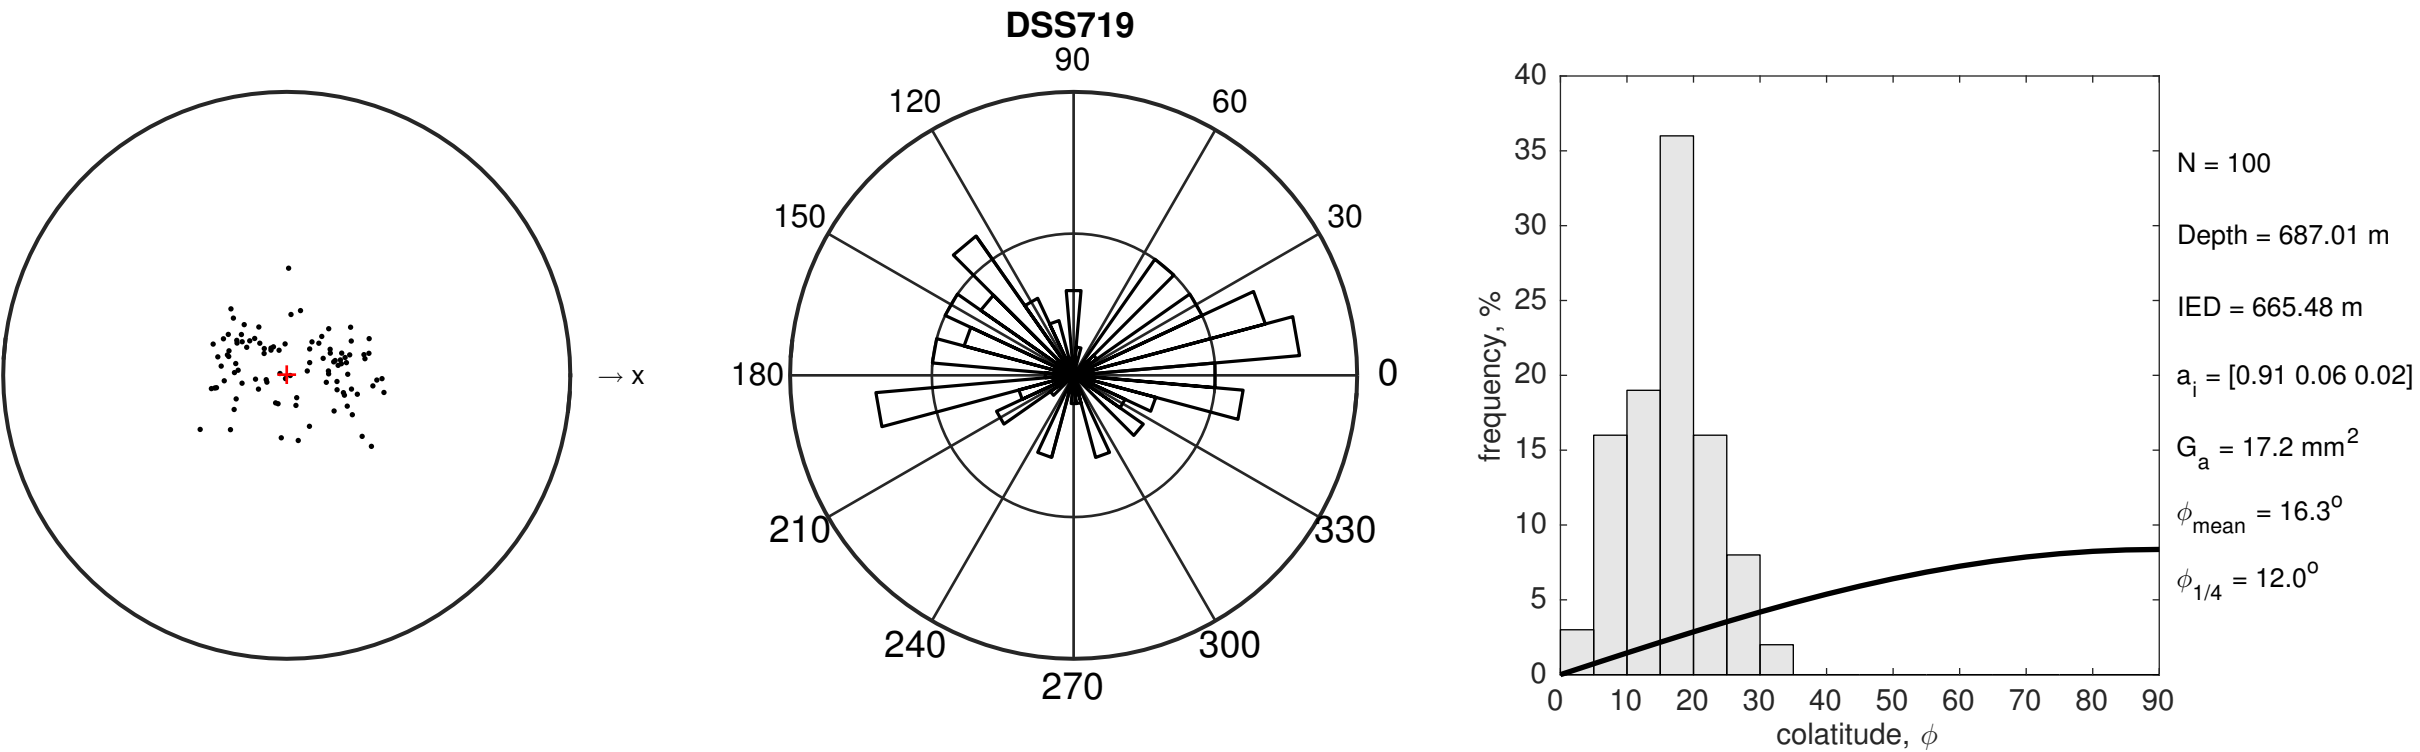

Supplement: Supplementary file 108 [file essd-2015-45-supplement.zip]

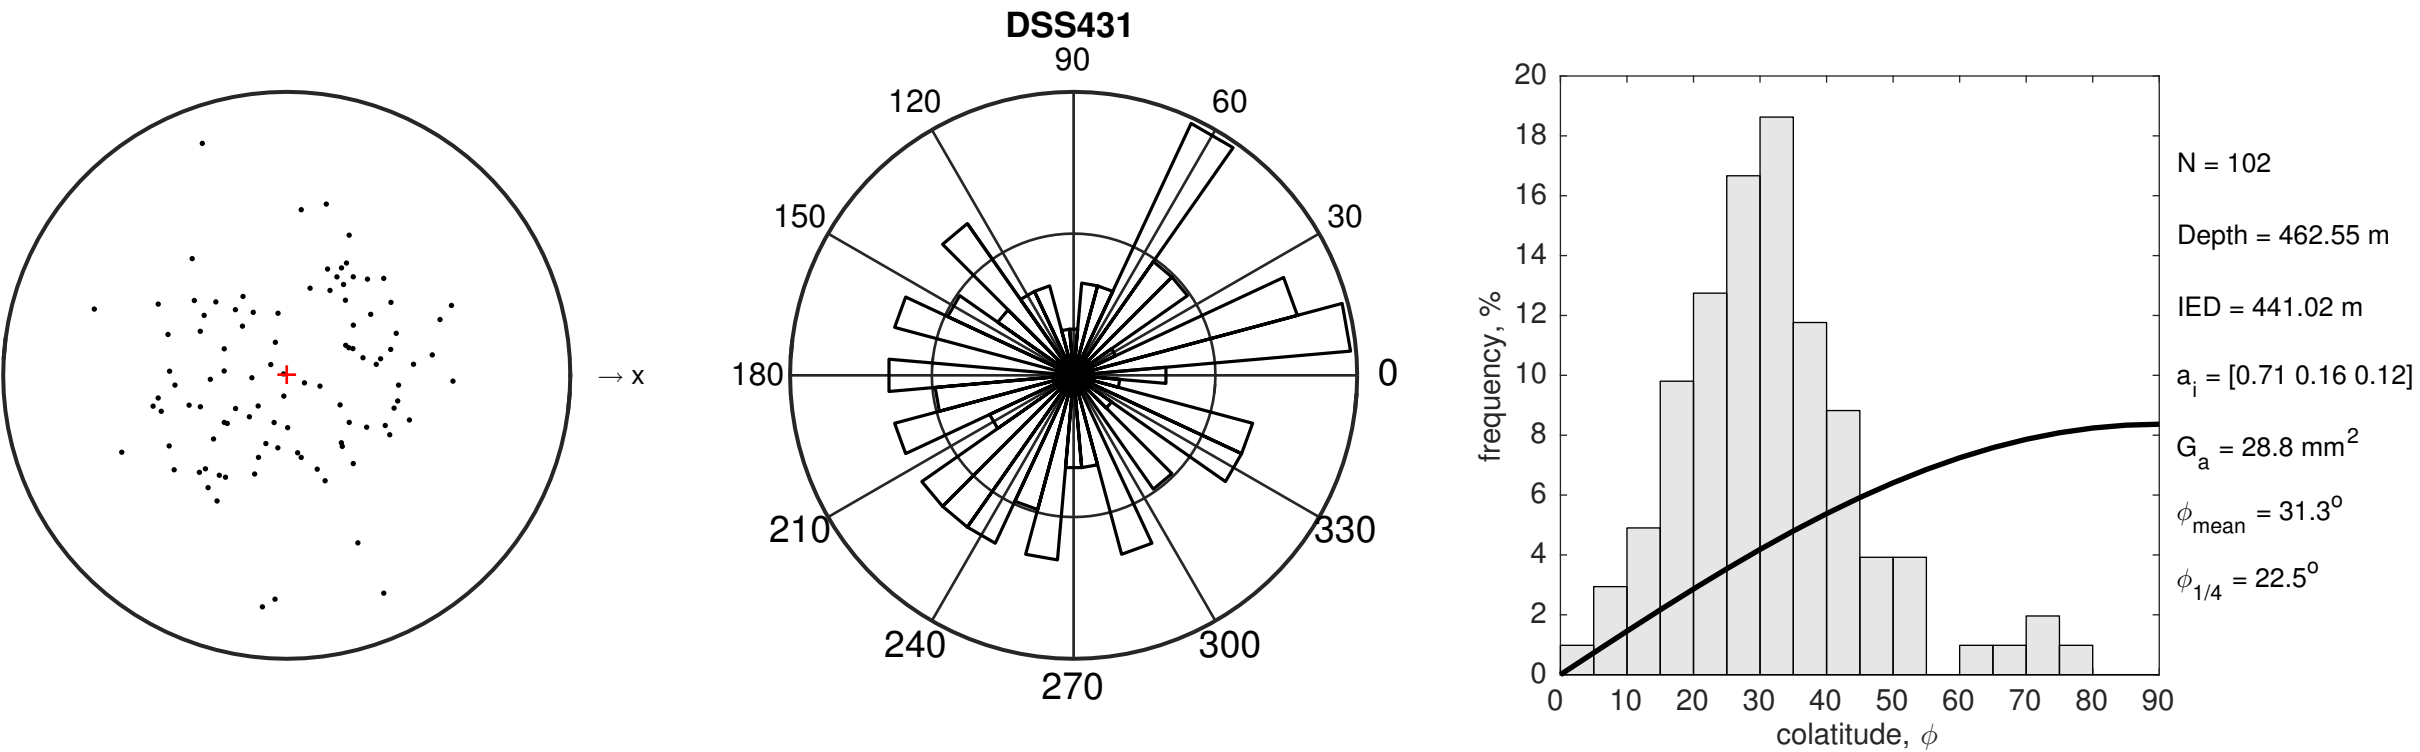

Supplement: Supplementary file 109 [file essd-2015-45-supplement.zip]

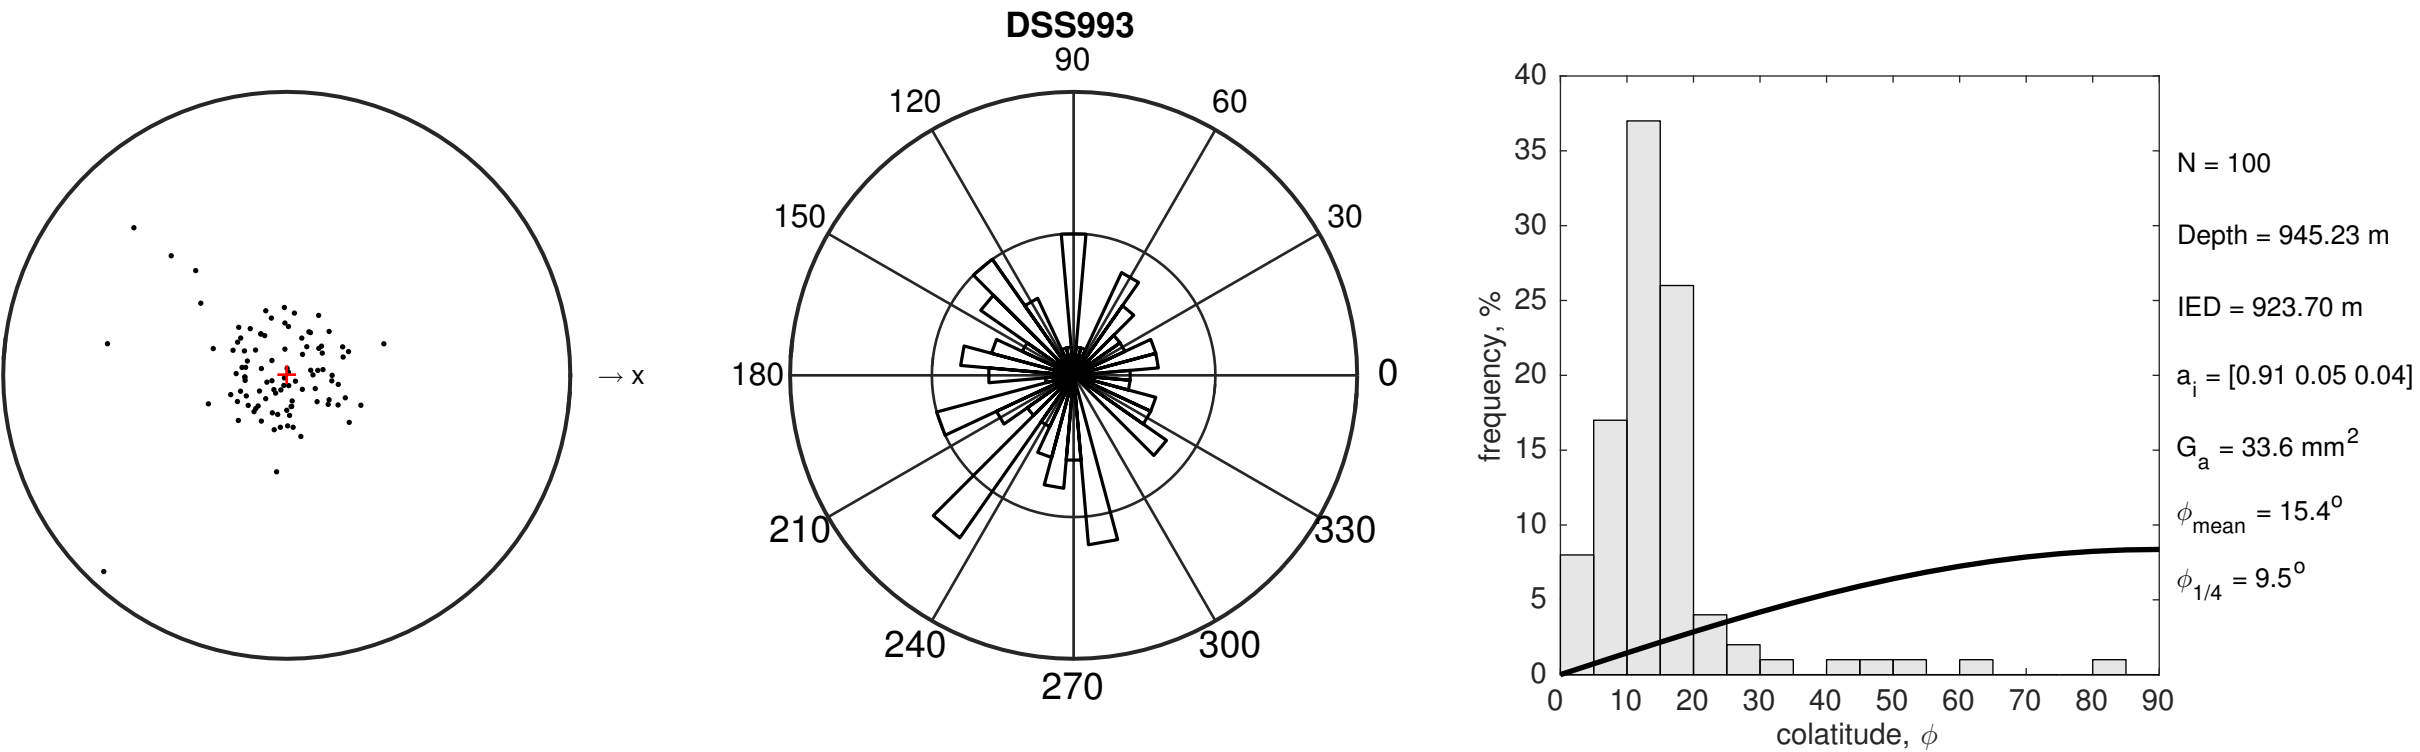

Supplement: Supplementary file 110 [file essd-2015-45-supplement.zip]

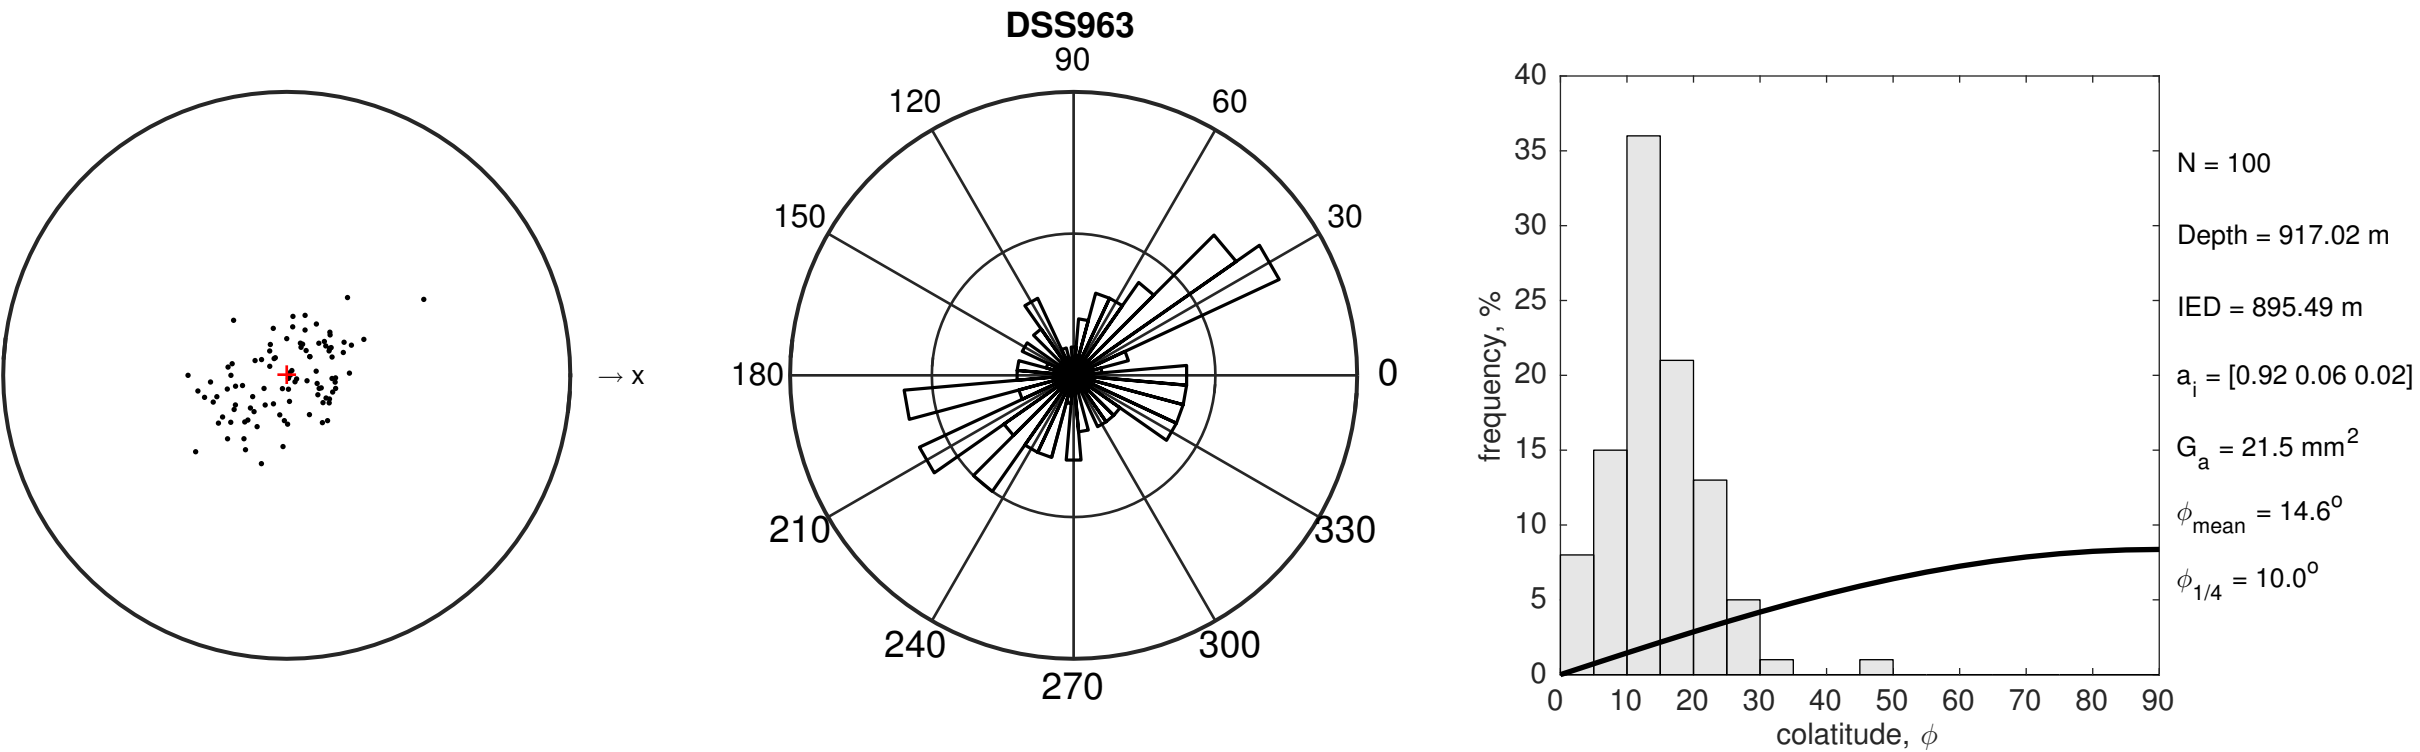

Supplement: Supplementary file 111 [file essd-2015-45-supplement.zip]

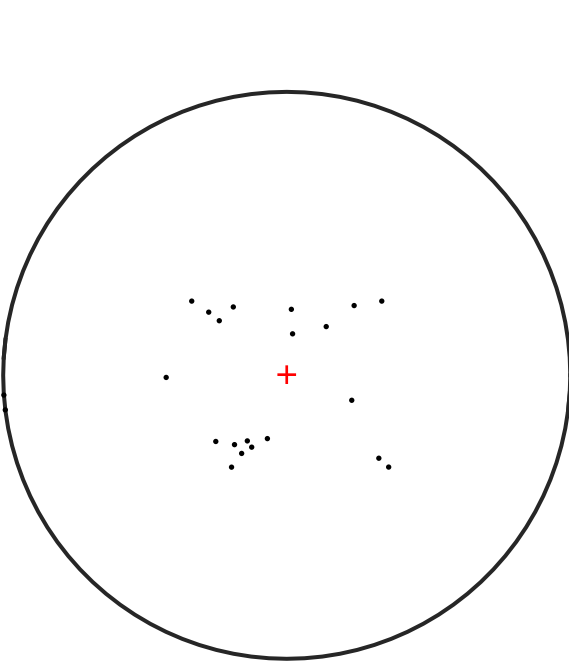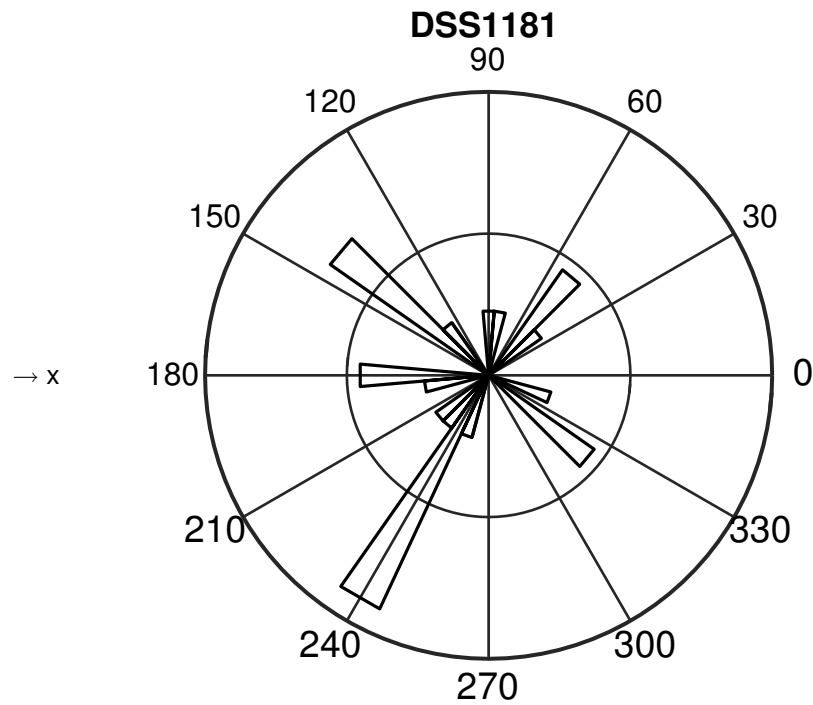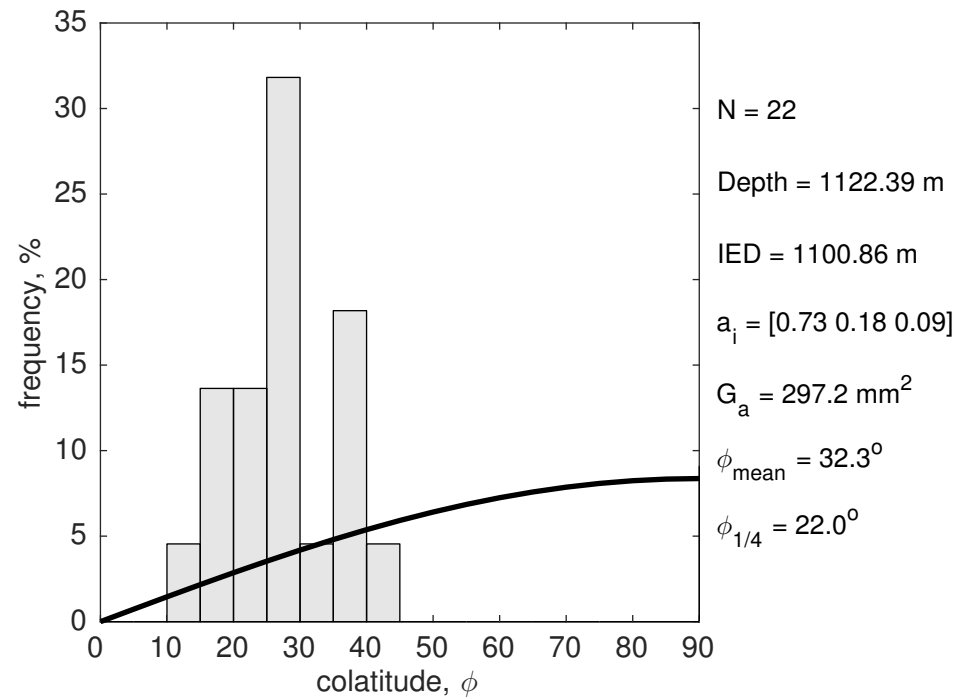

Supplement: Supplementary file 112 [file essd-2015-45-supplement.zip]

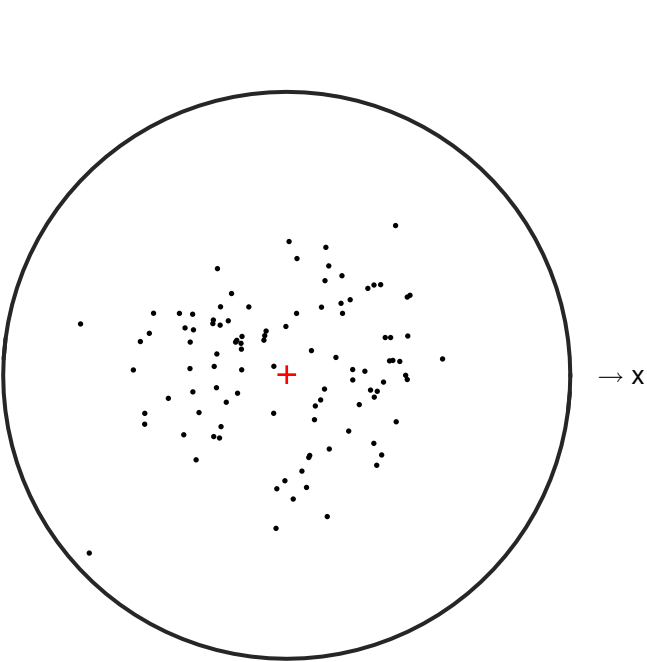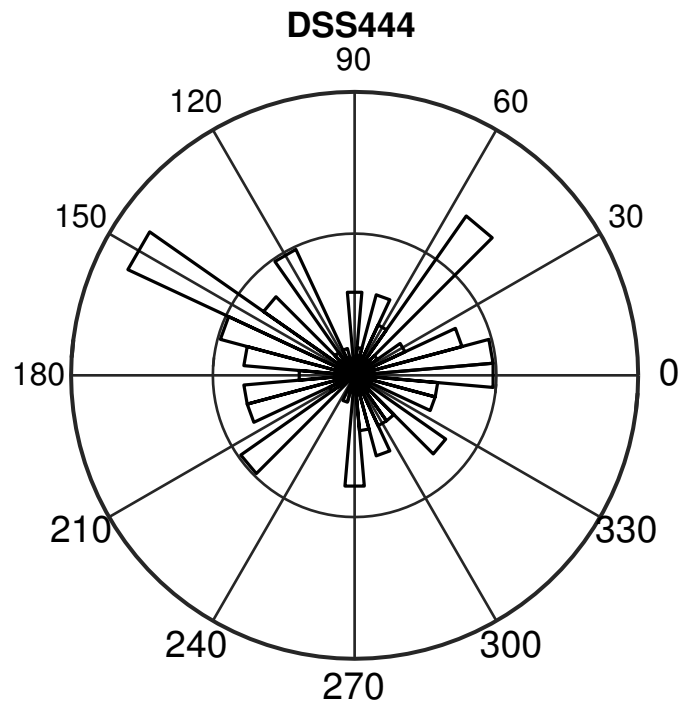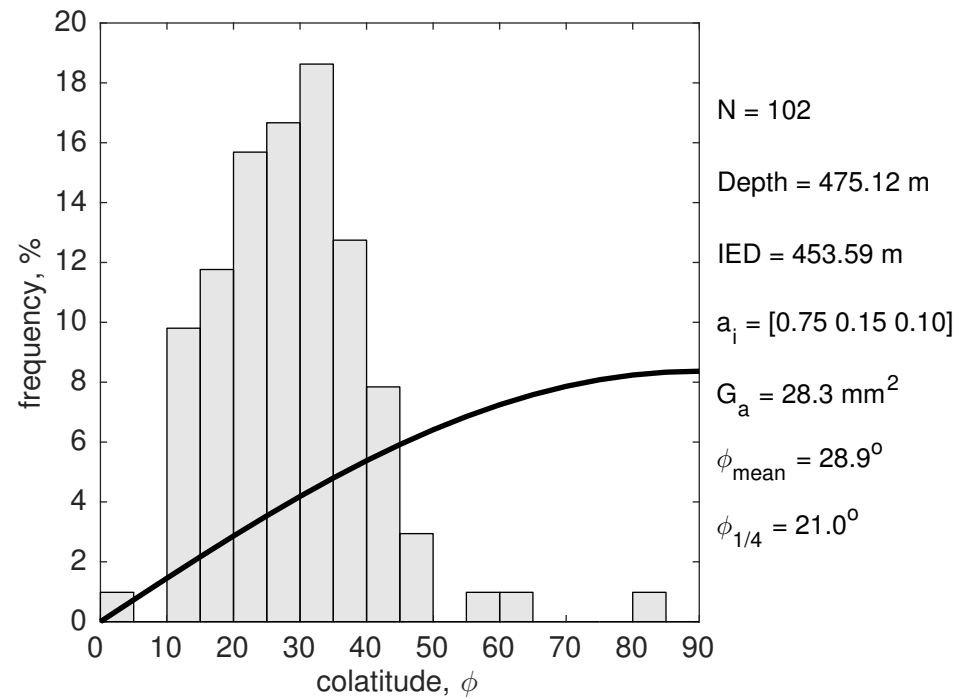

Supplement: Supplementary file 113 [file essd-2015-45-supplement.zip]

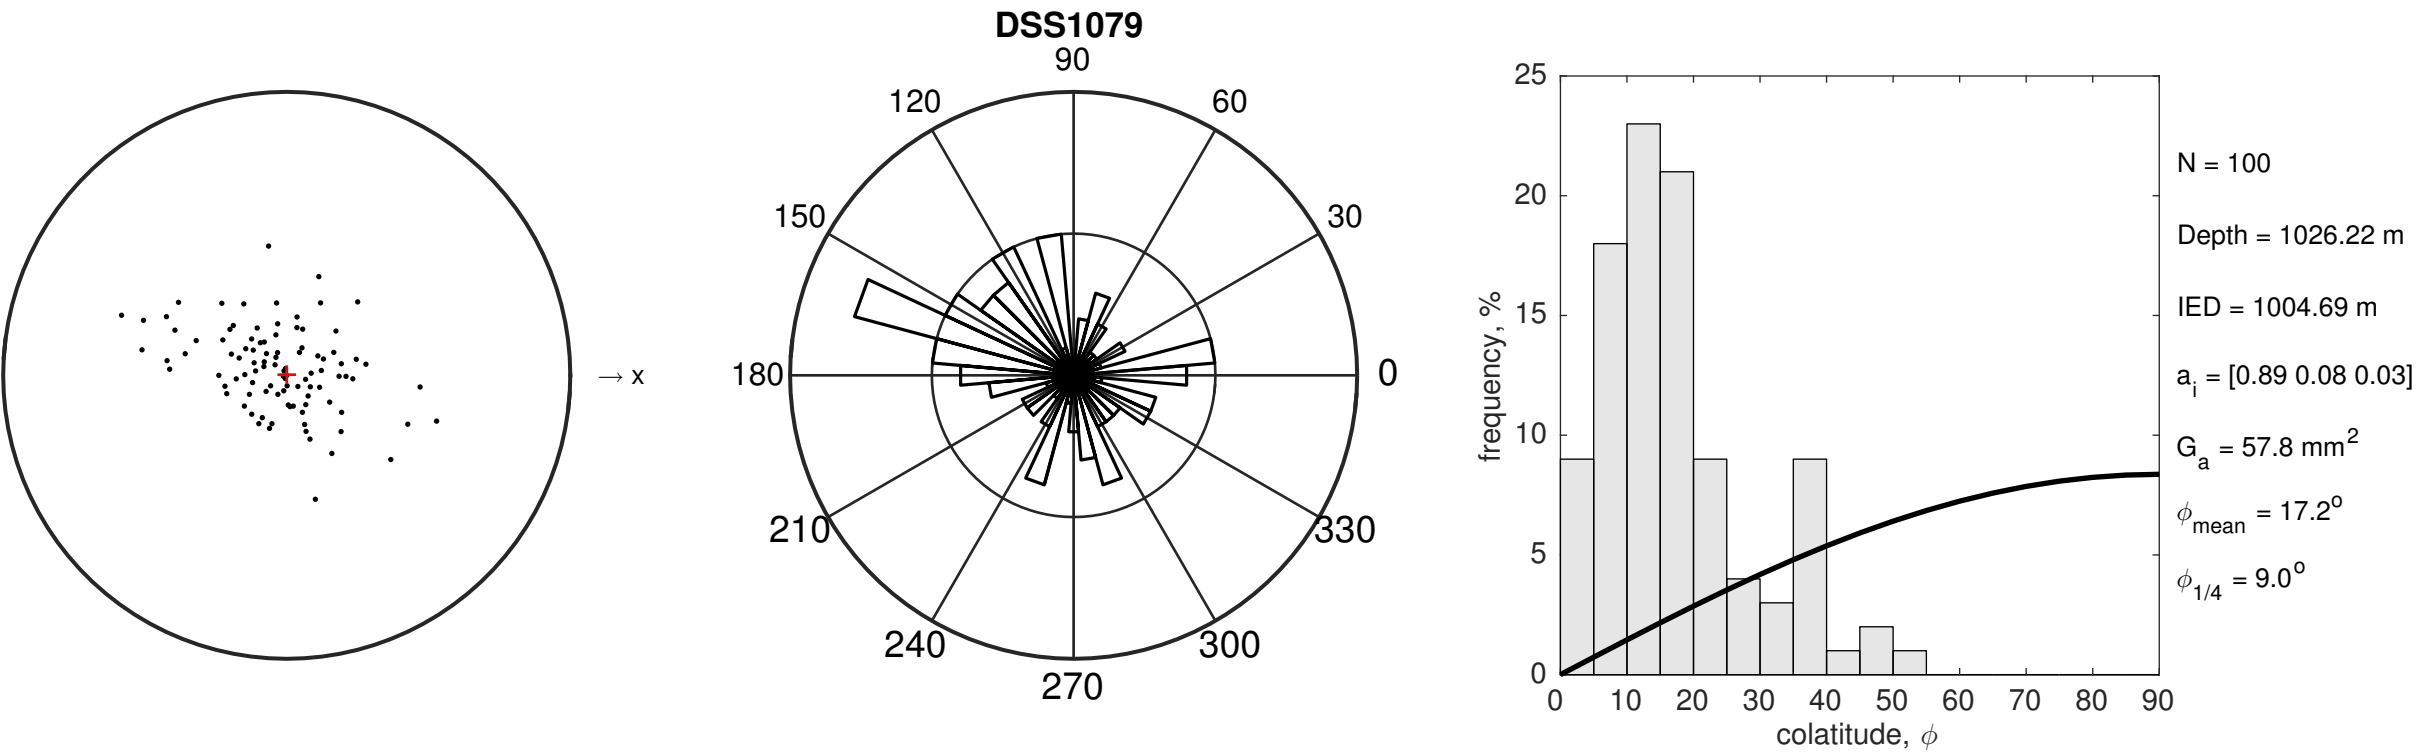

Supplement: Supplementary file 114 [file essd-2015-45-supplement.zip]

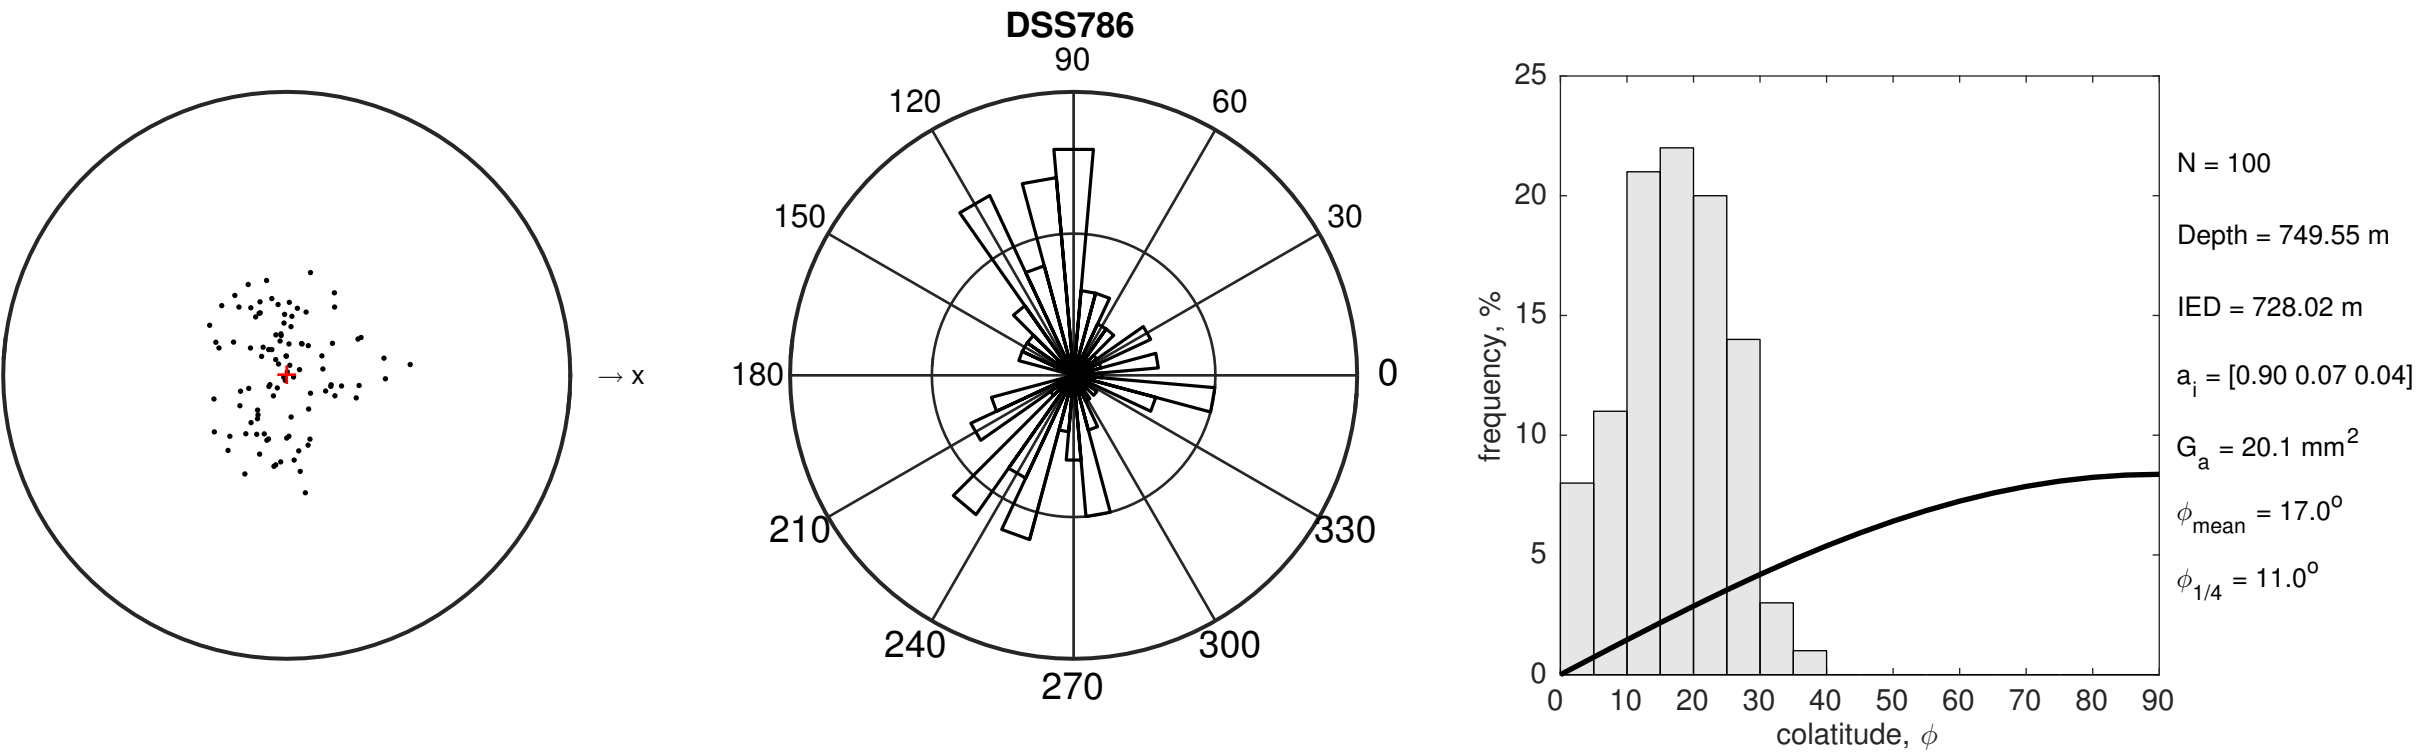

Supplement: Supplementary file 115 [file essd-2015-45-supplement.zip]

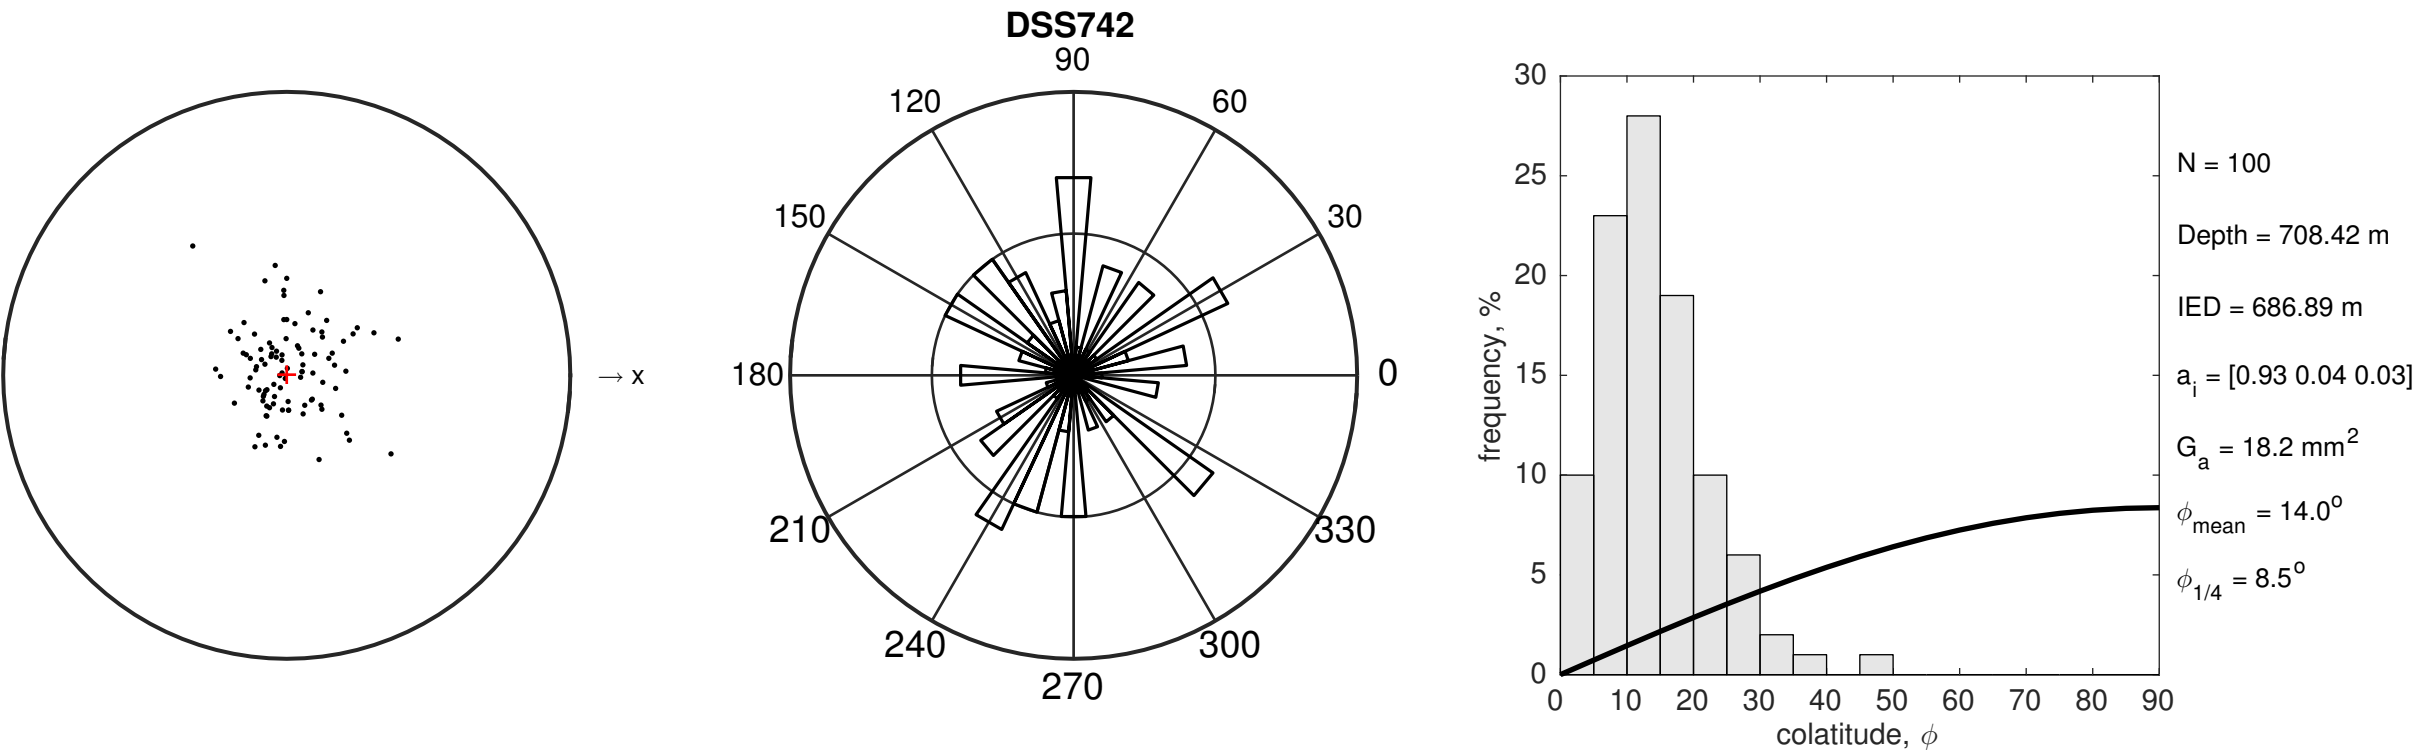

Supplement: Supplementary file 116 [file essd-2015-45-supplement.zip]

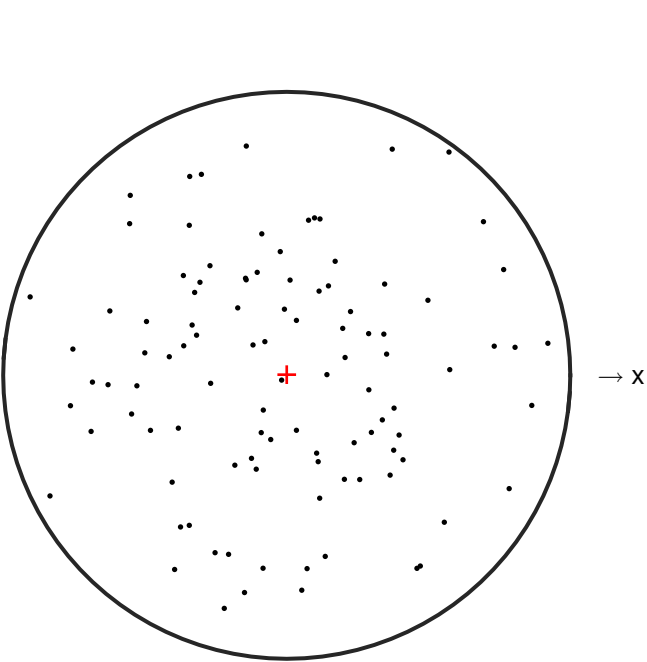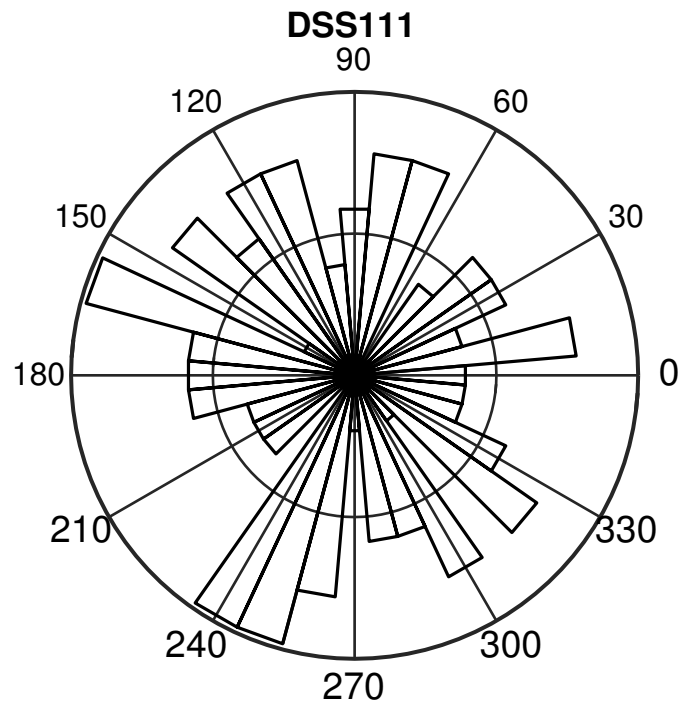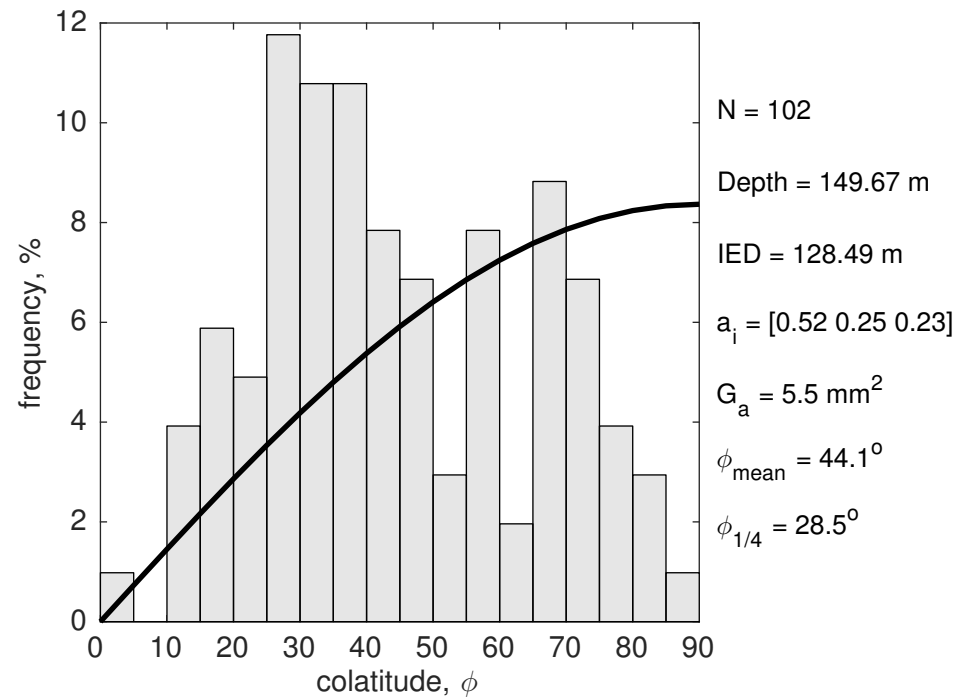

Supplement: Supplementary file 117 [file essd-2015-45-supplement.zip]

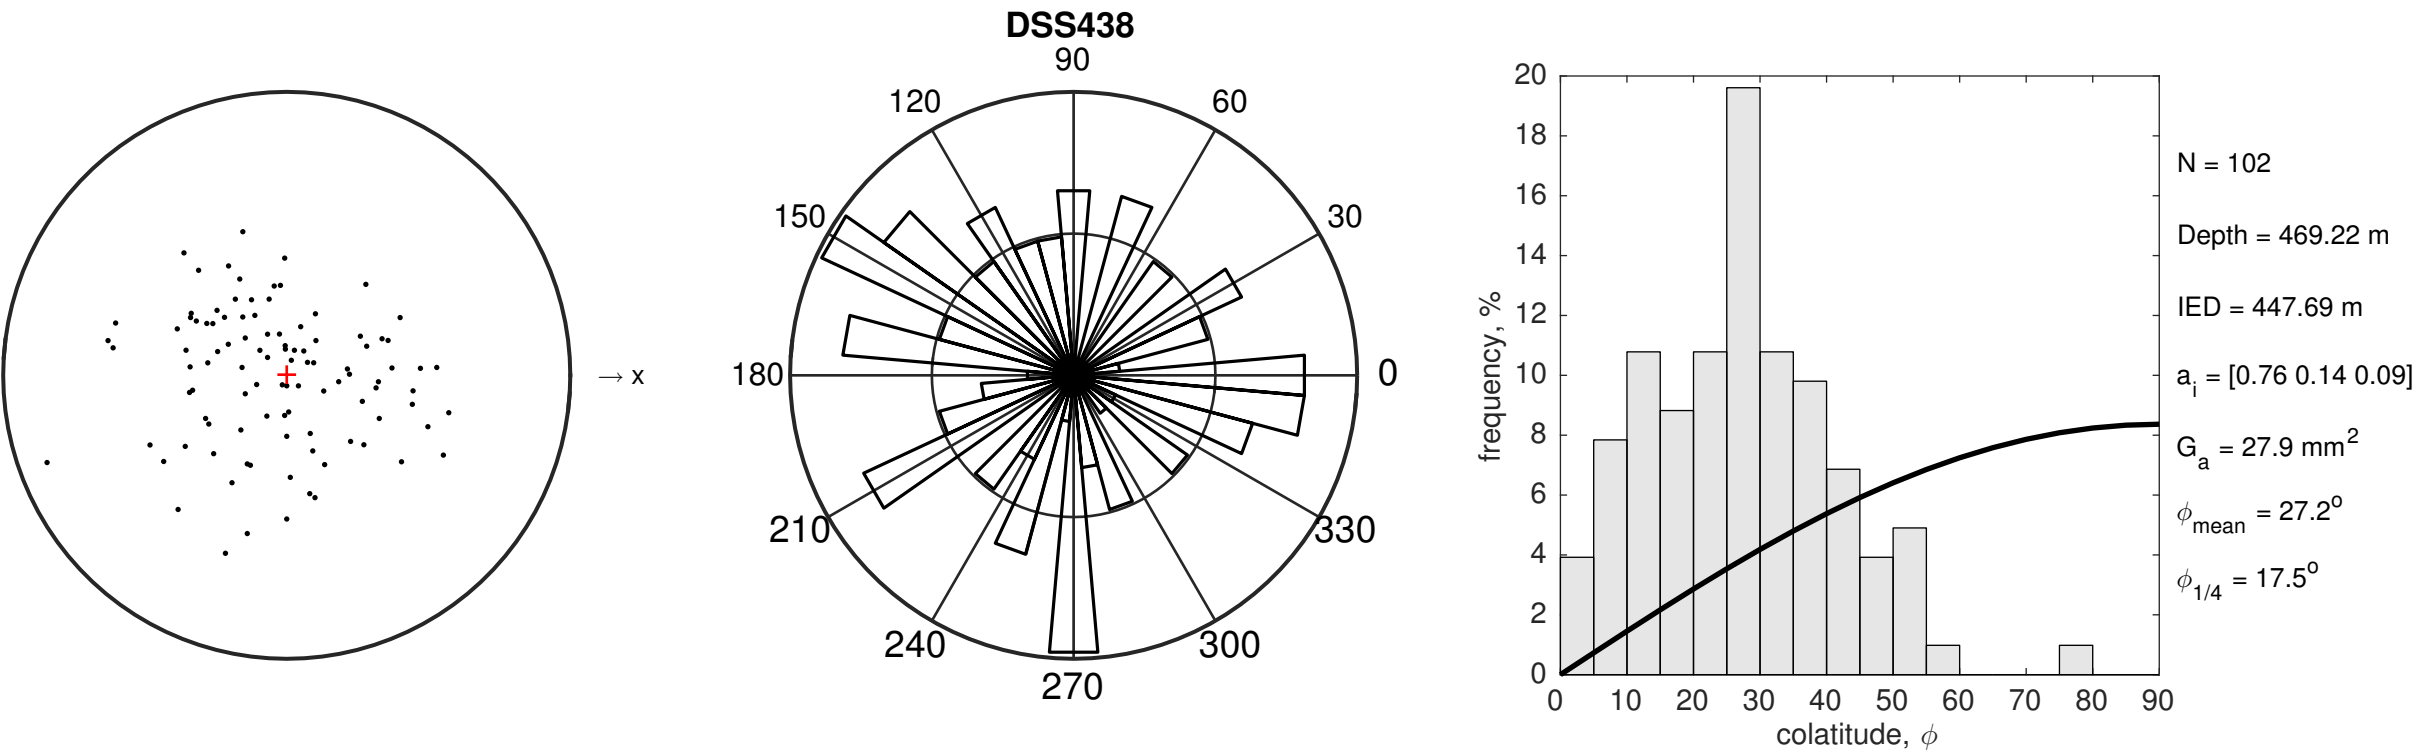

Supplement: Supplementary file 118 [file essd-2015-45-supplement.zip]

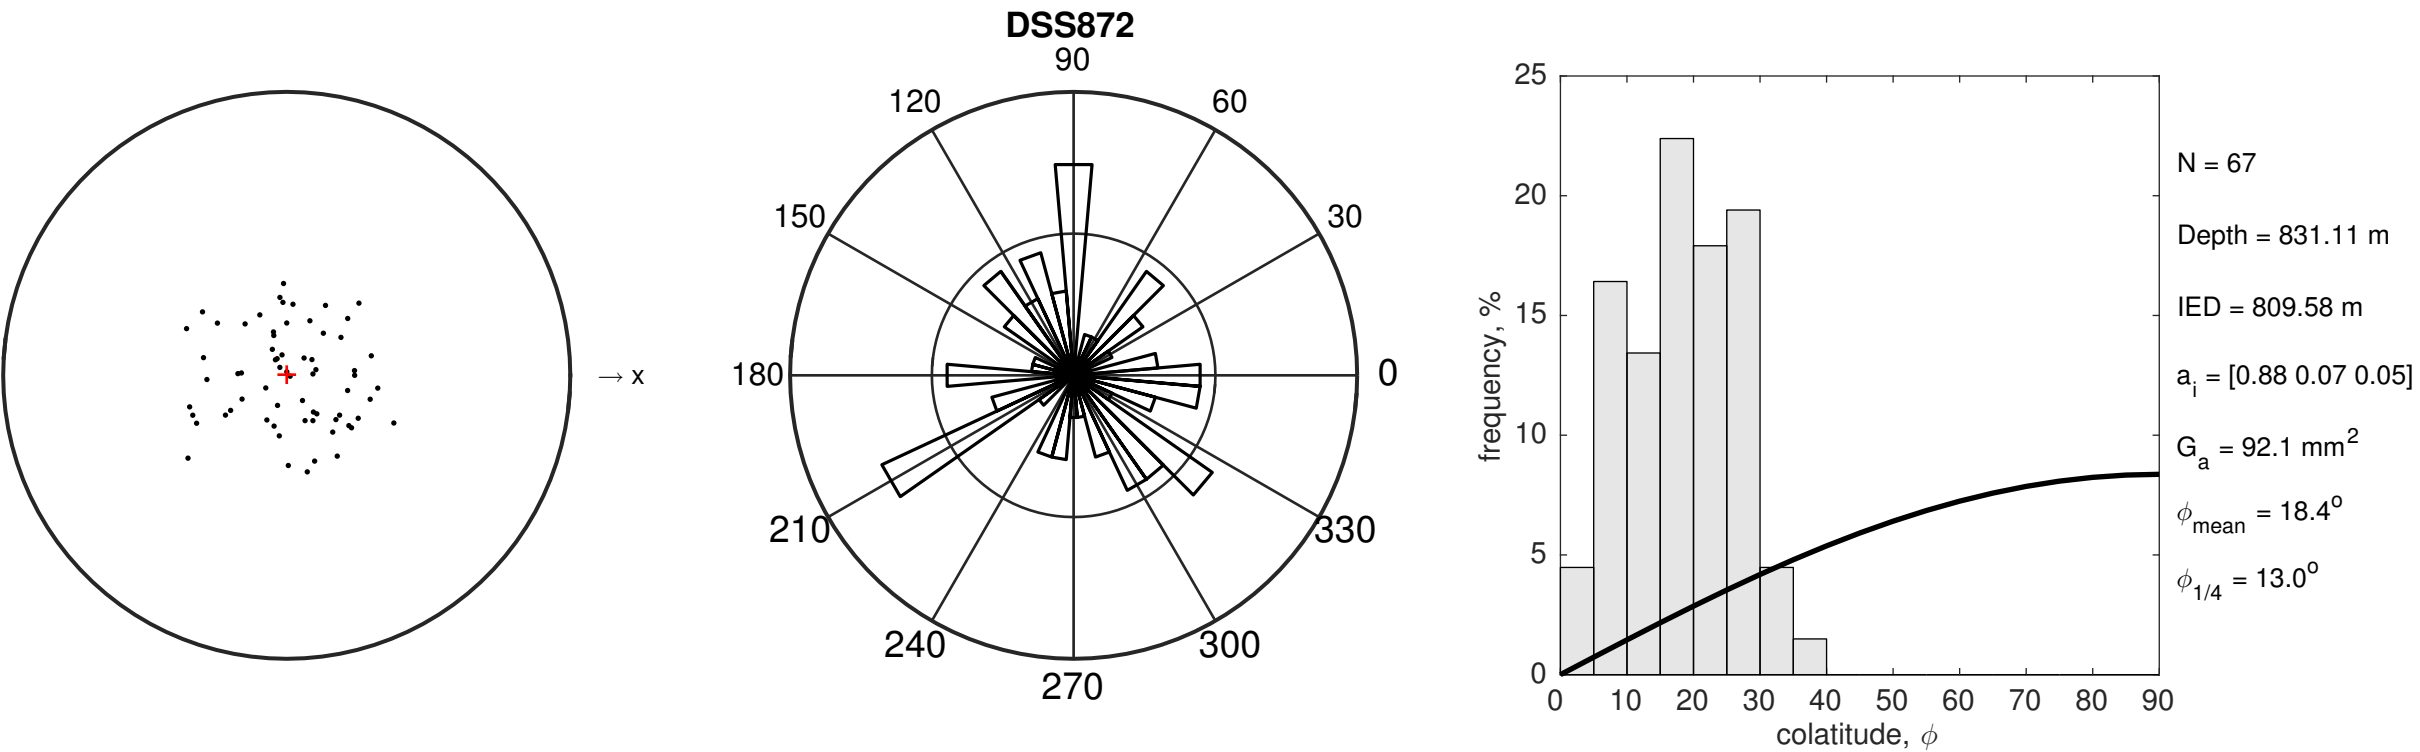

Supplement: Supplementary file 119 [file essd-2015-45-supplement.zip]

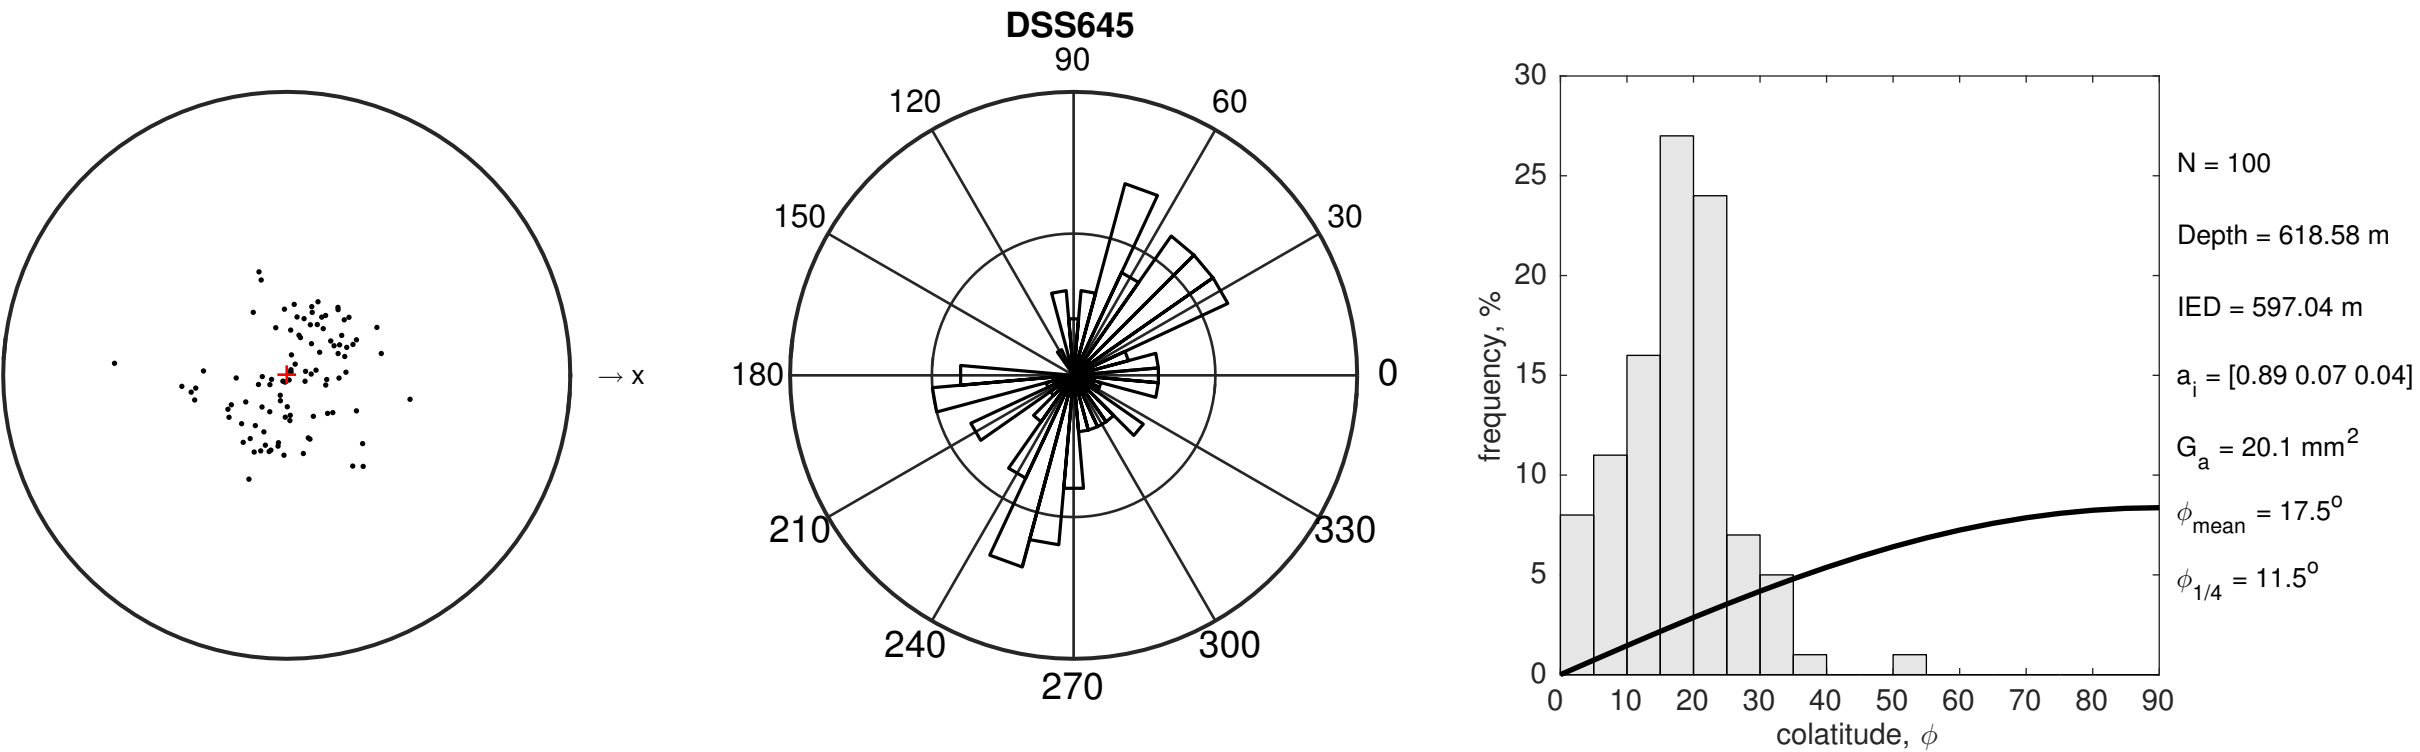

Supplement: Supplementary file 120 [file essd-2015-45-supplement.zip]

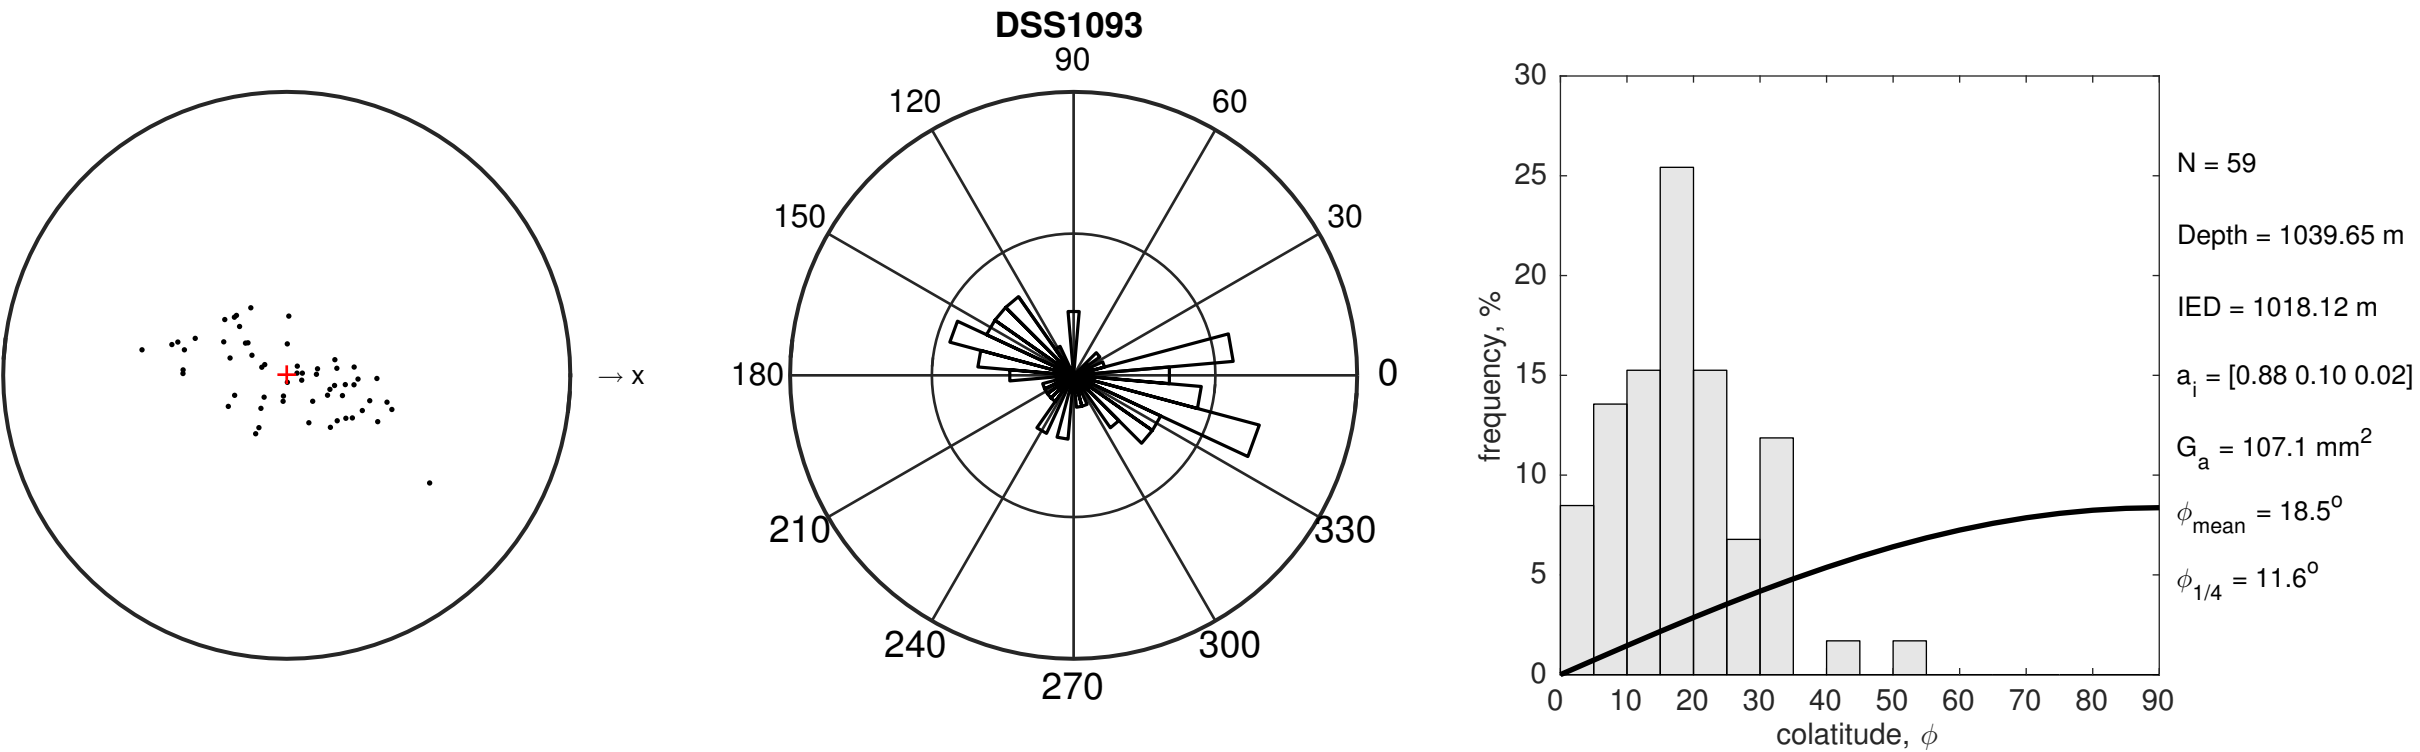

Supplement: Supplementary file 121 [file essd-2015-45-supplement.zip]

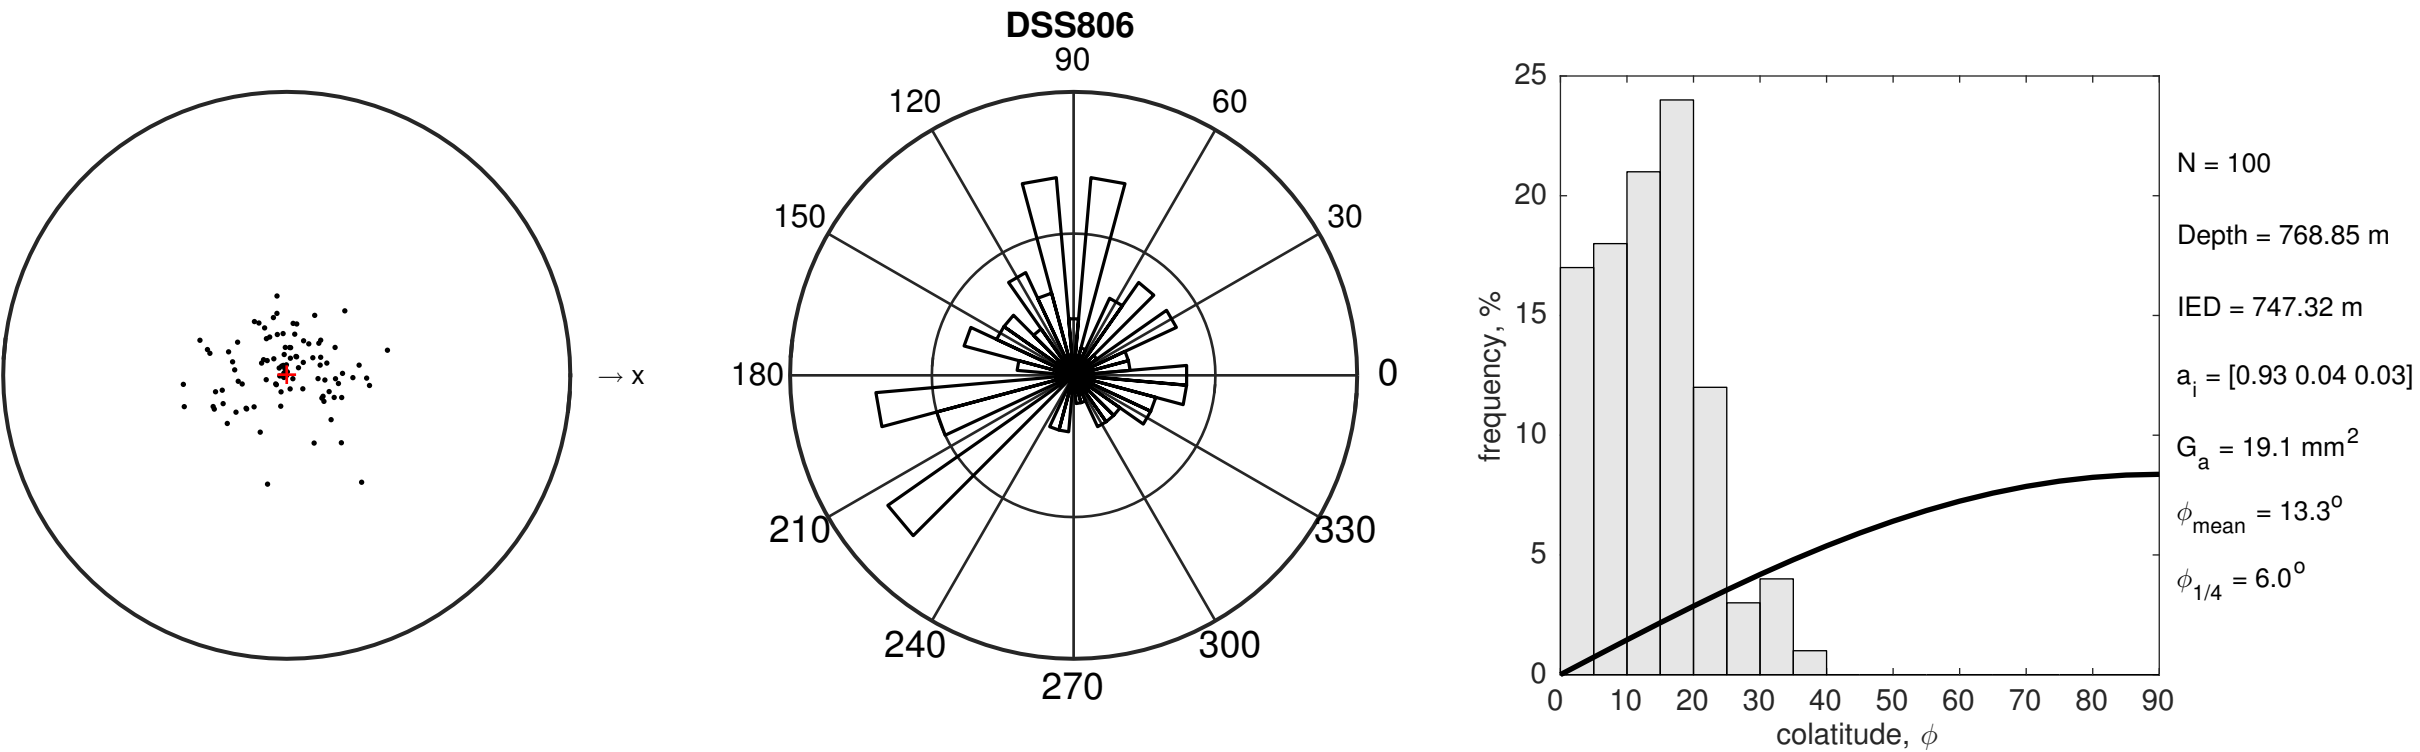

Supplement: Supplementary file 122 [file essd-2015-45-supplement.zip]

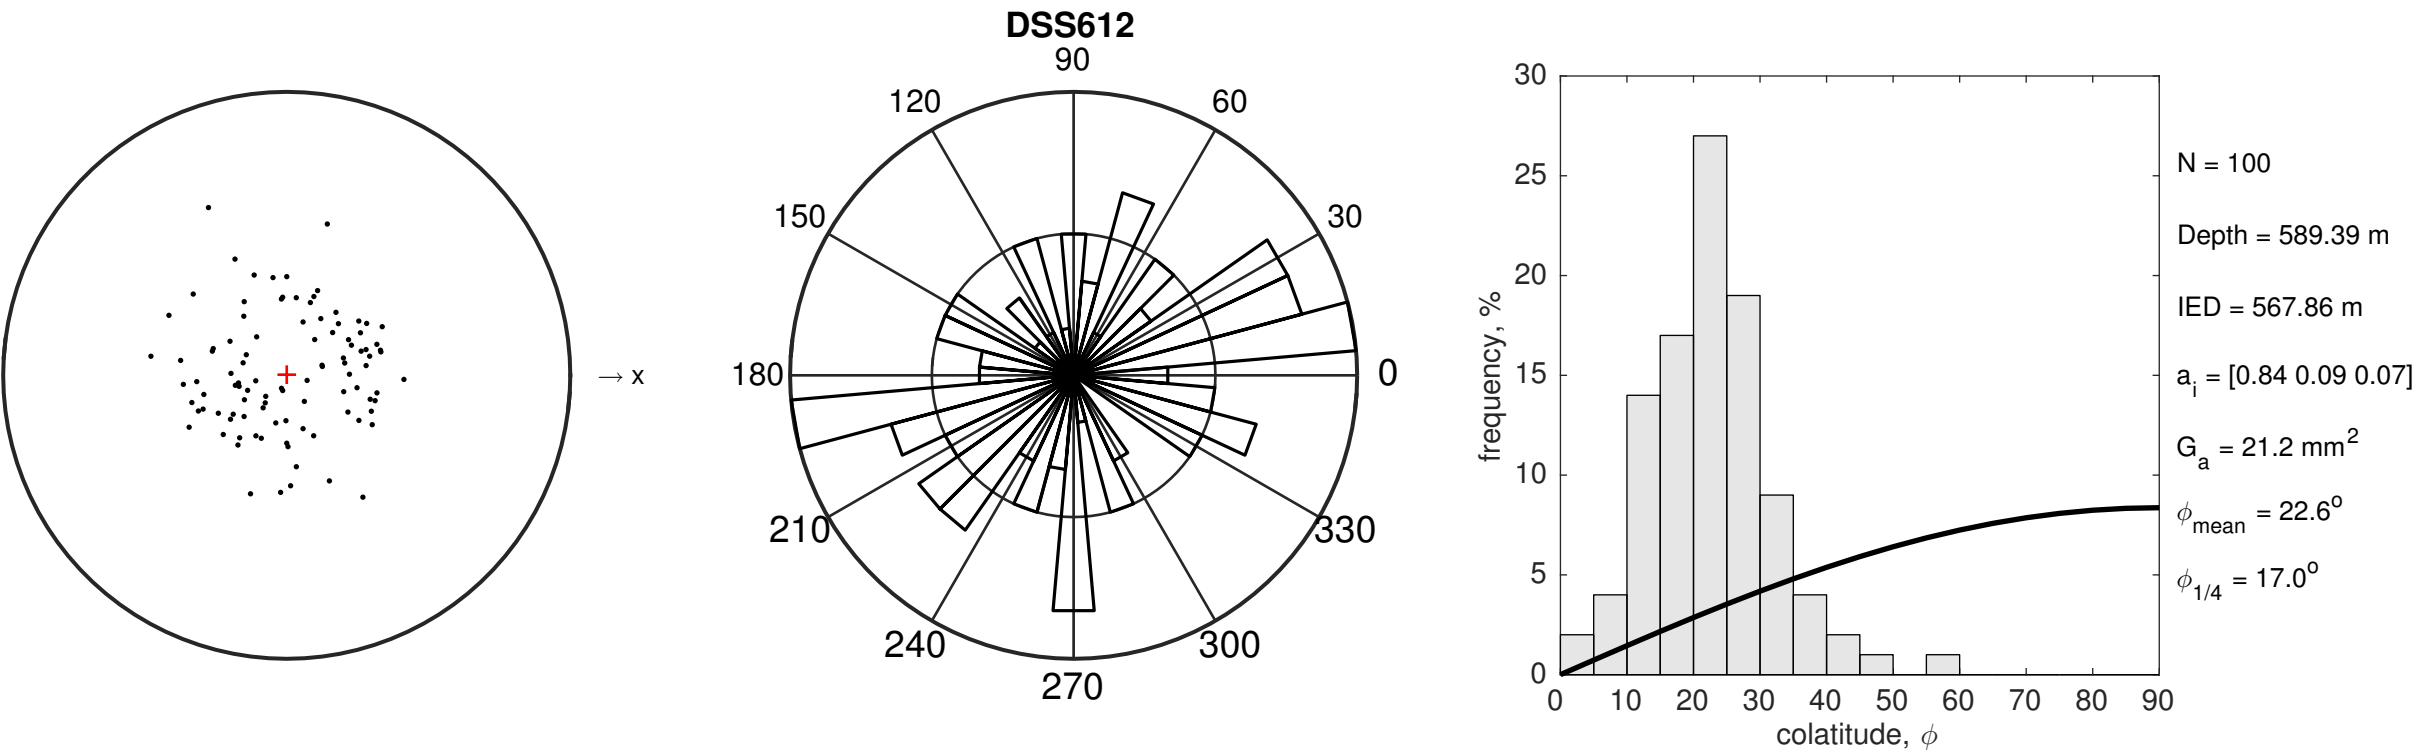

Supplement: Supplementary file 123 [file essd-2015-45-supplement.zip]

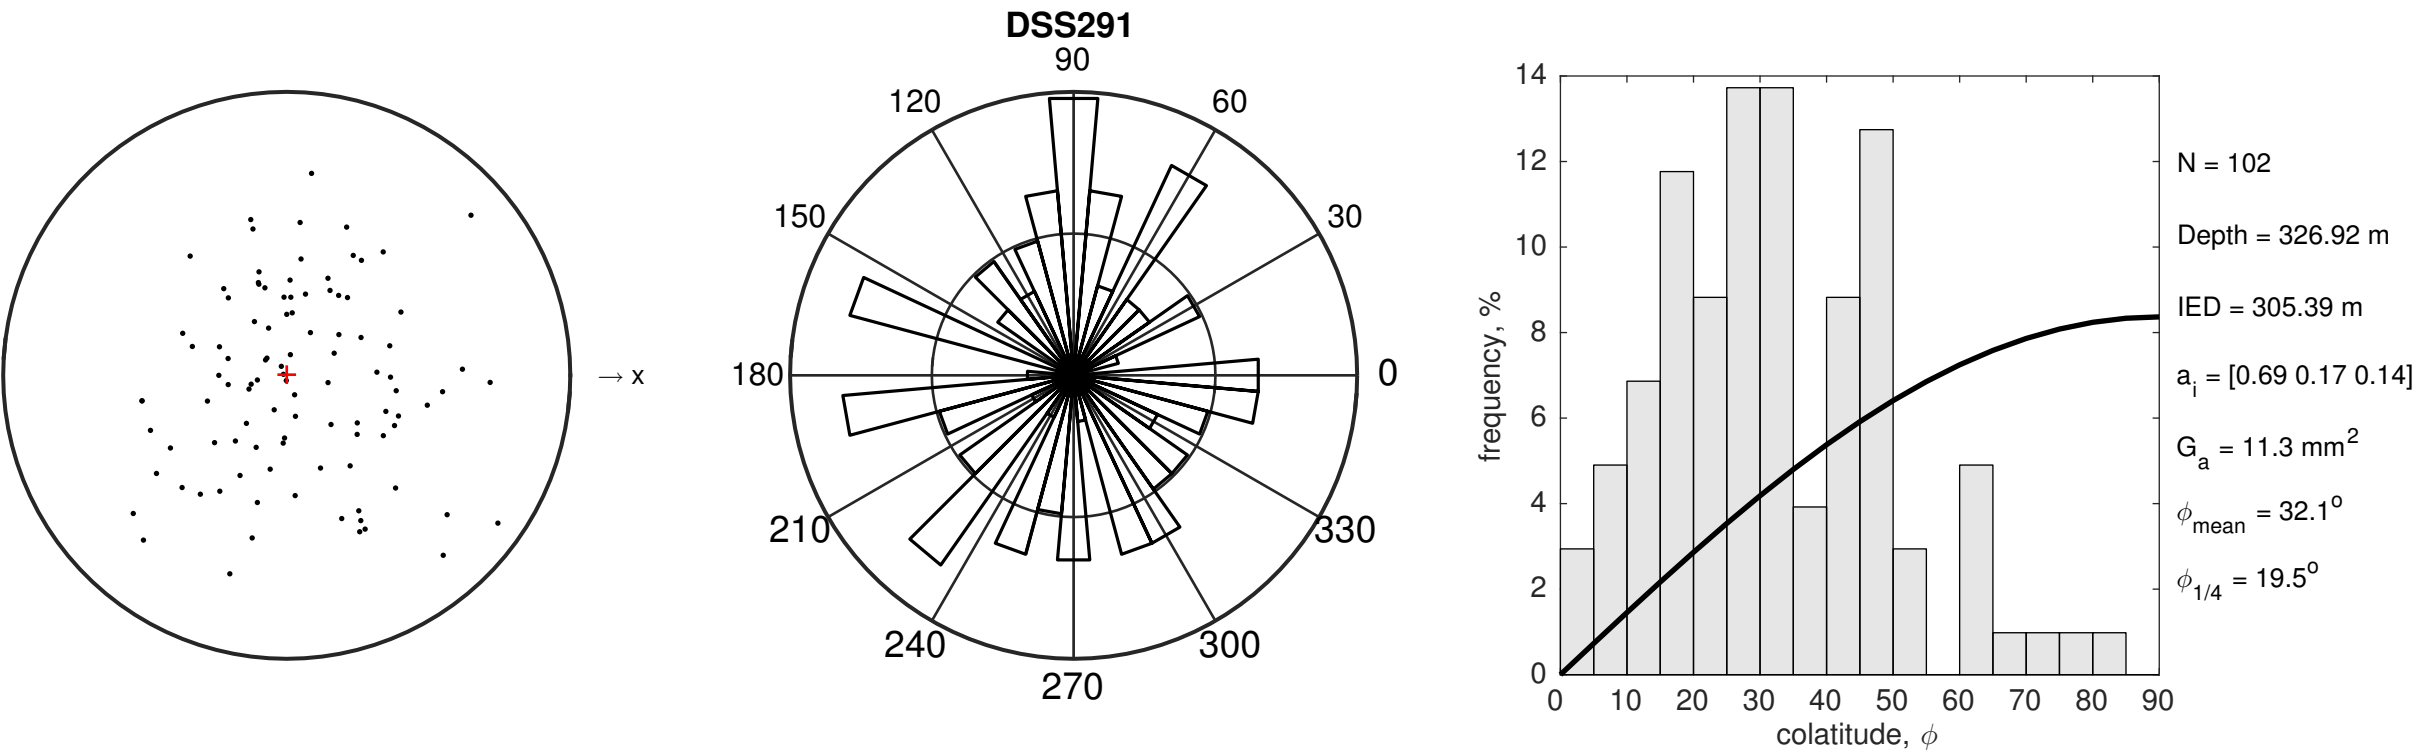

Supplement: Supplementary file 124 [file essd-2015-45-supplement.zip]

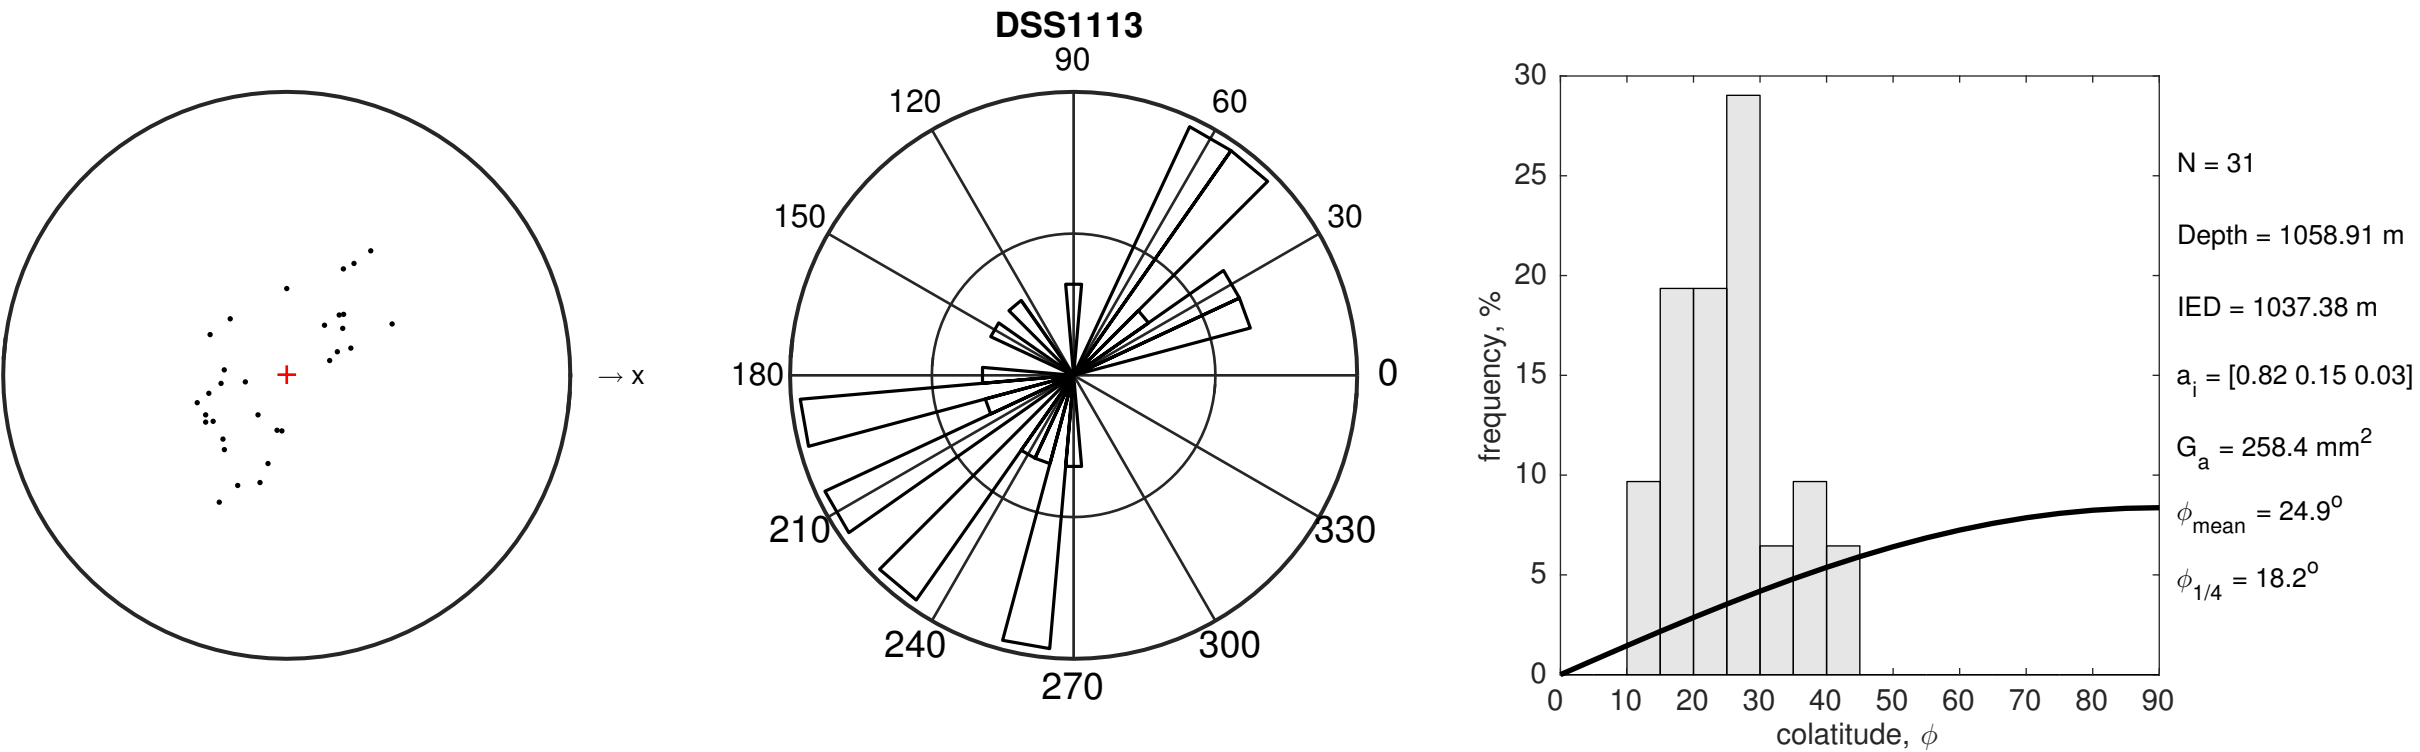

Supplement: Supplementary file 125 [file essd-2015-45-supplement.zip]

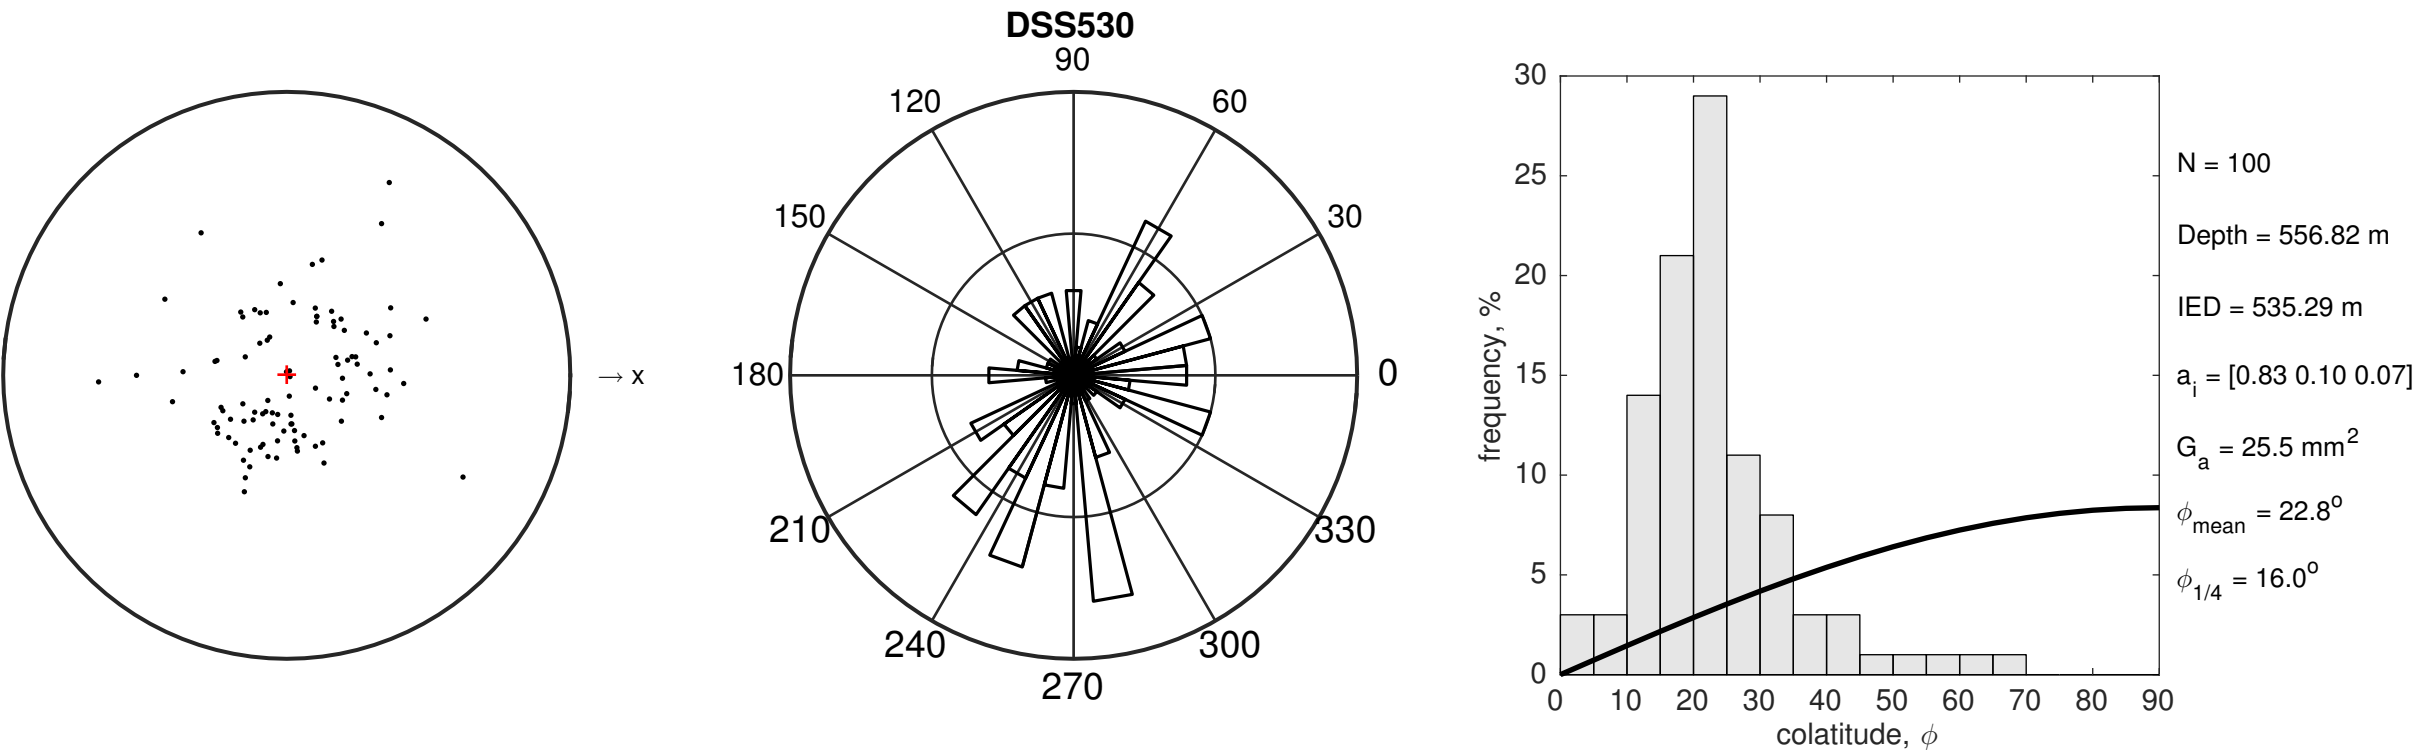

Supplement: Supplementary file 126 [file essd-2015-45-supplement.zip]

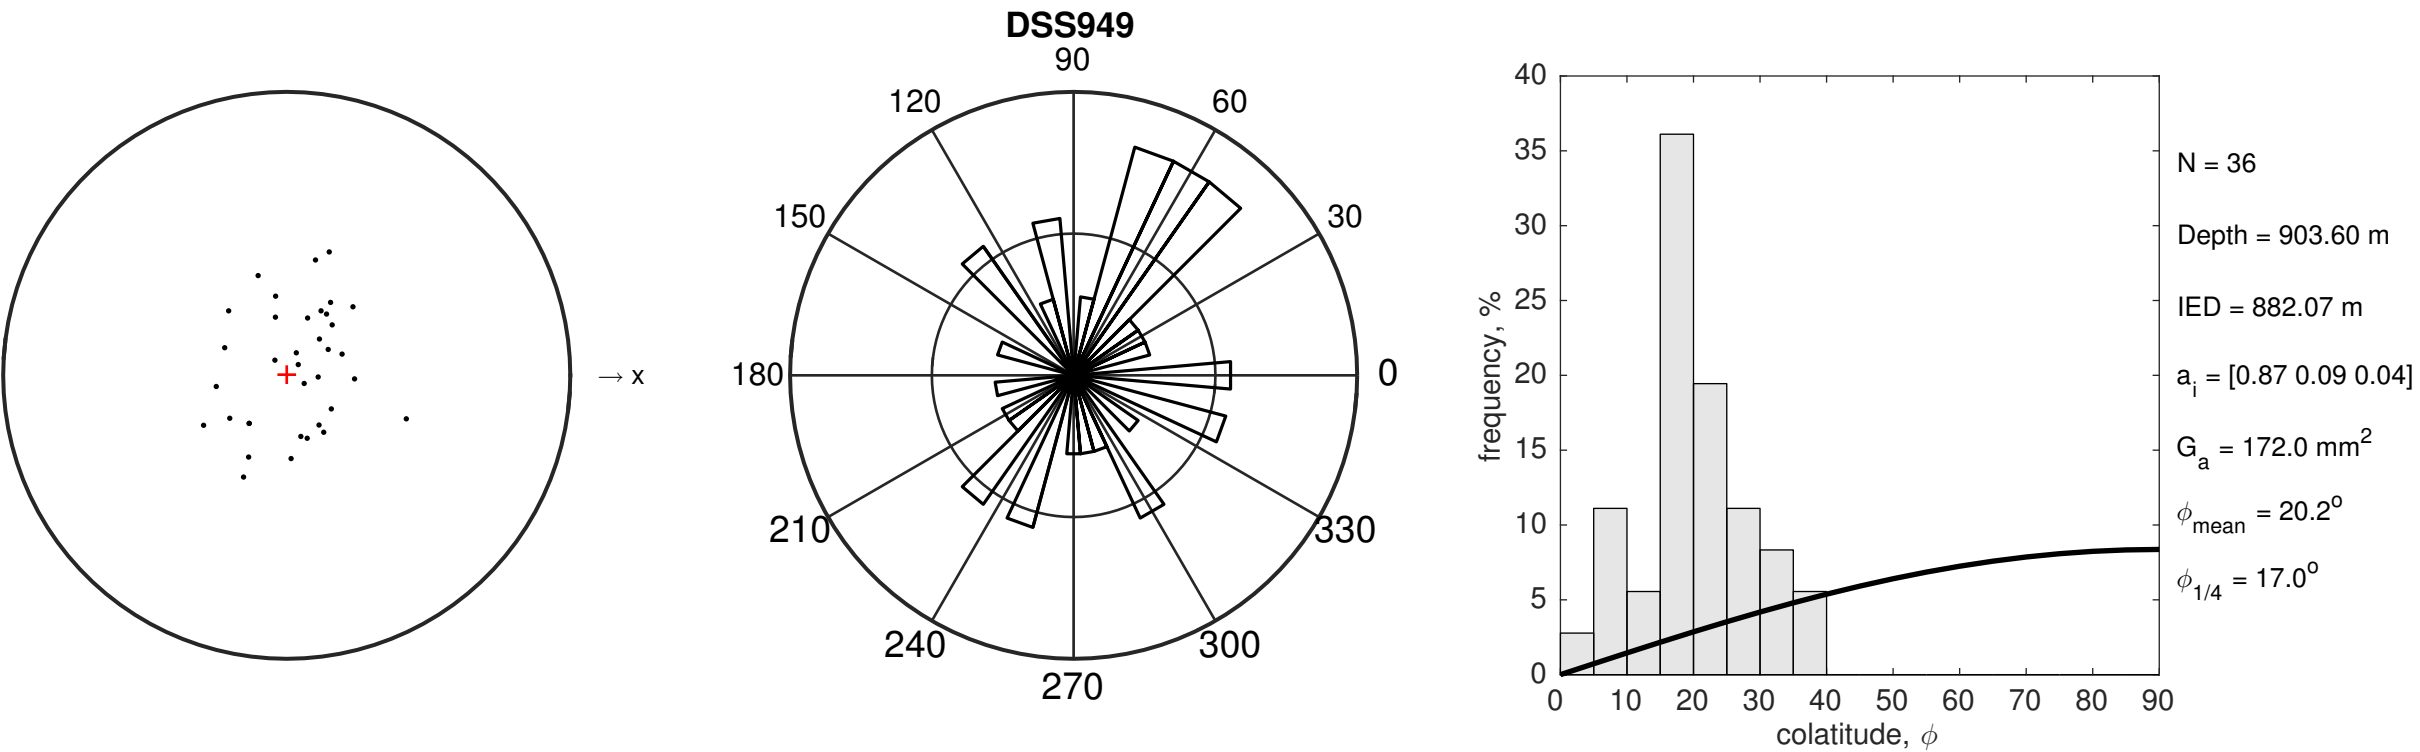

Supplement: Supplementary file 127 [file essd-2015-45-supplement.zip]

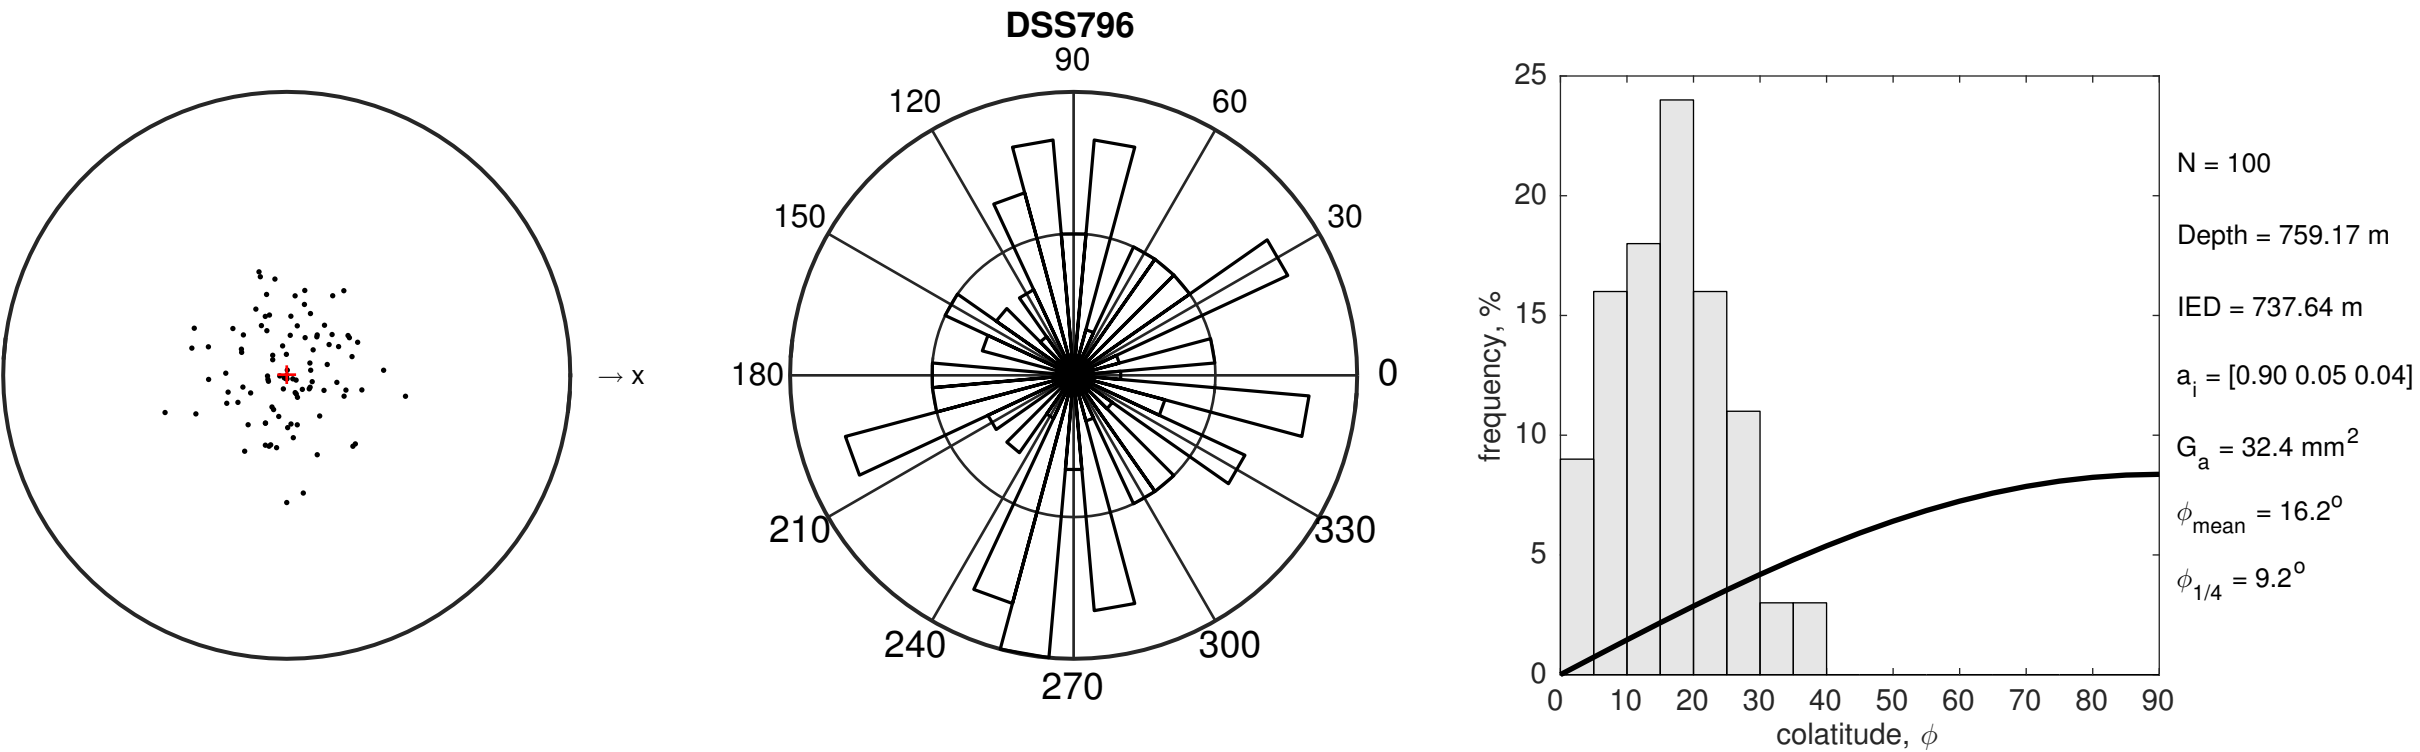

Supplement: Supplementary file 128 [file essd-2015-45-supplement.zip]

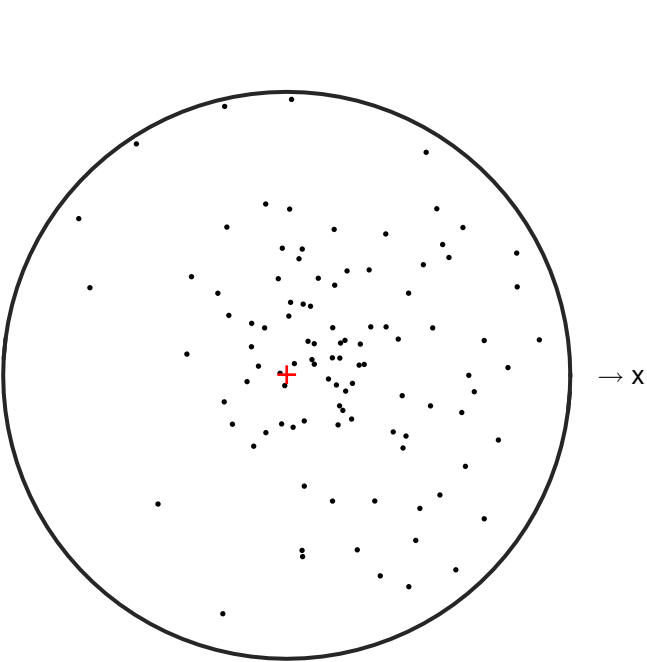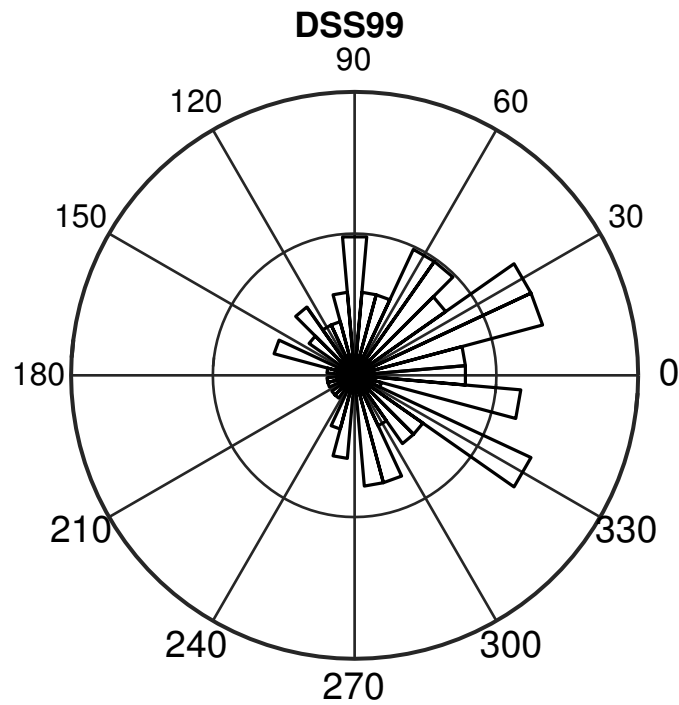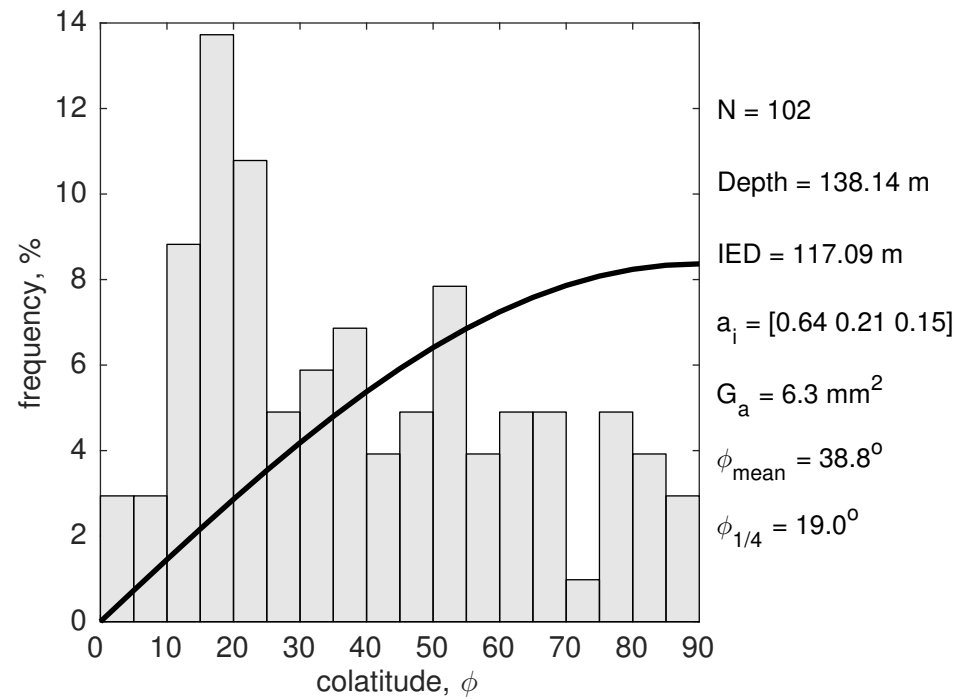

Supplement: Supplementary file 129 [file essd-2015-45-supplement.zip]

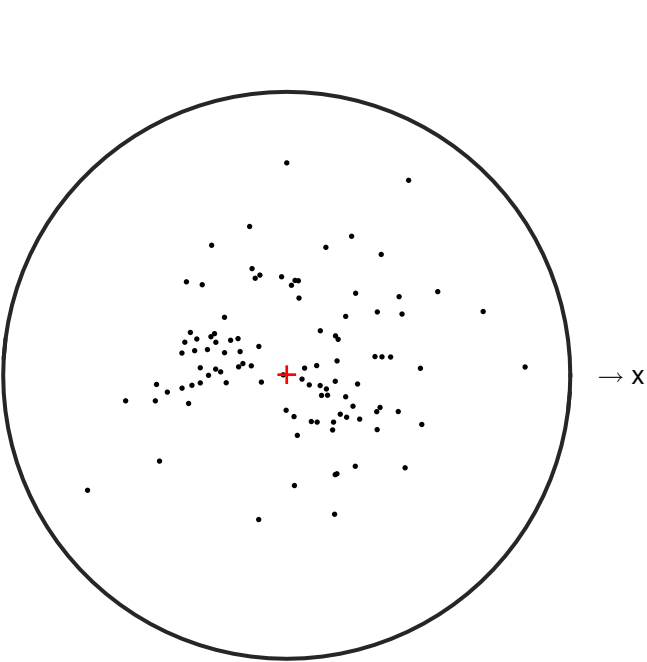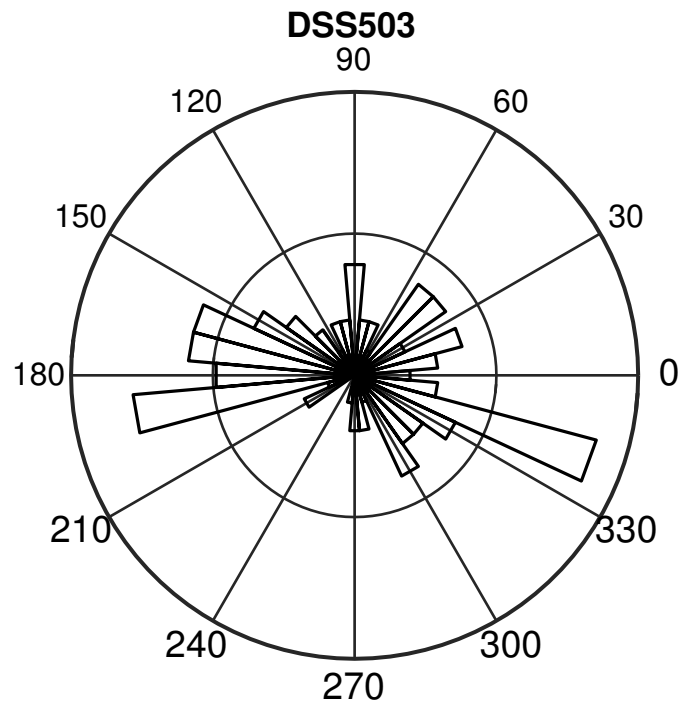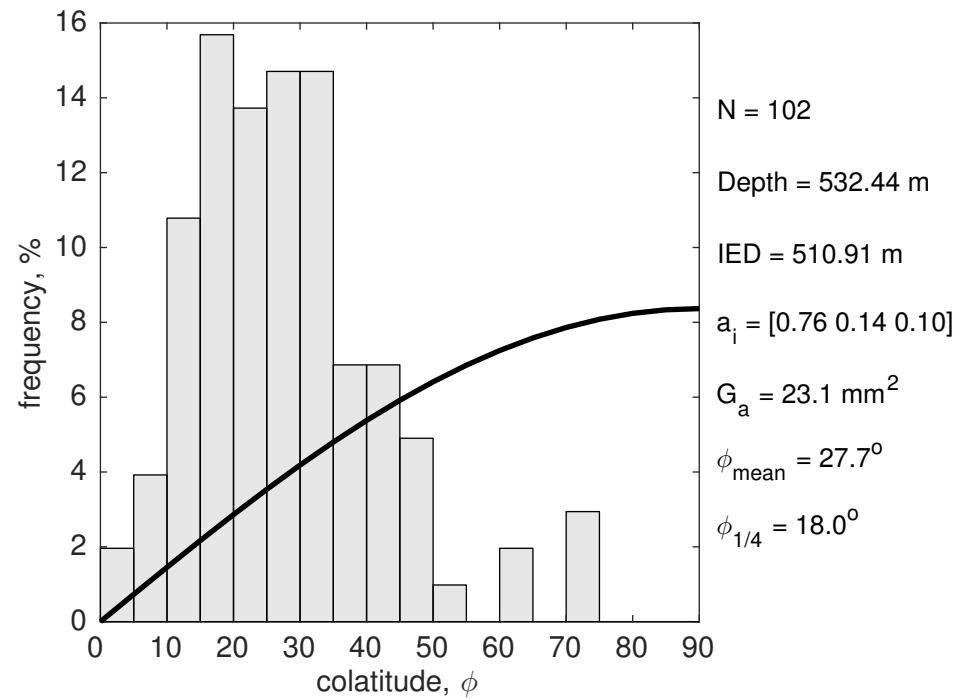

Supplement: Supplementary file 130 [file essd-2015-45-supplement.zip]

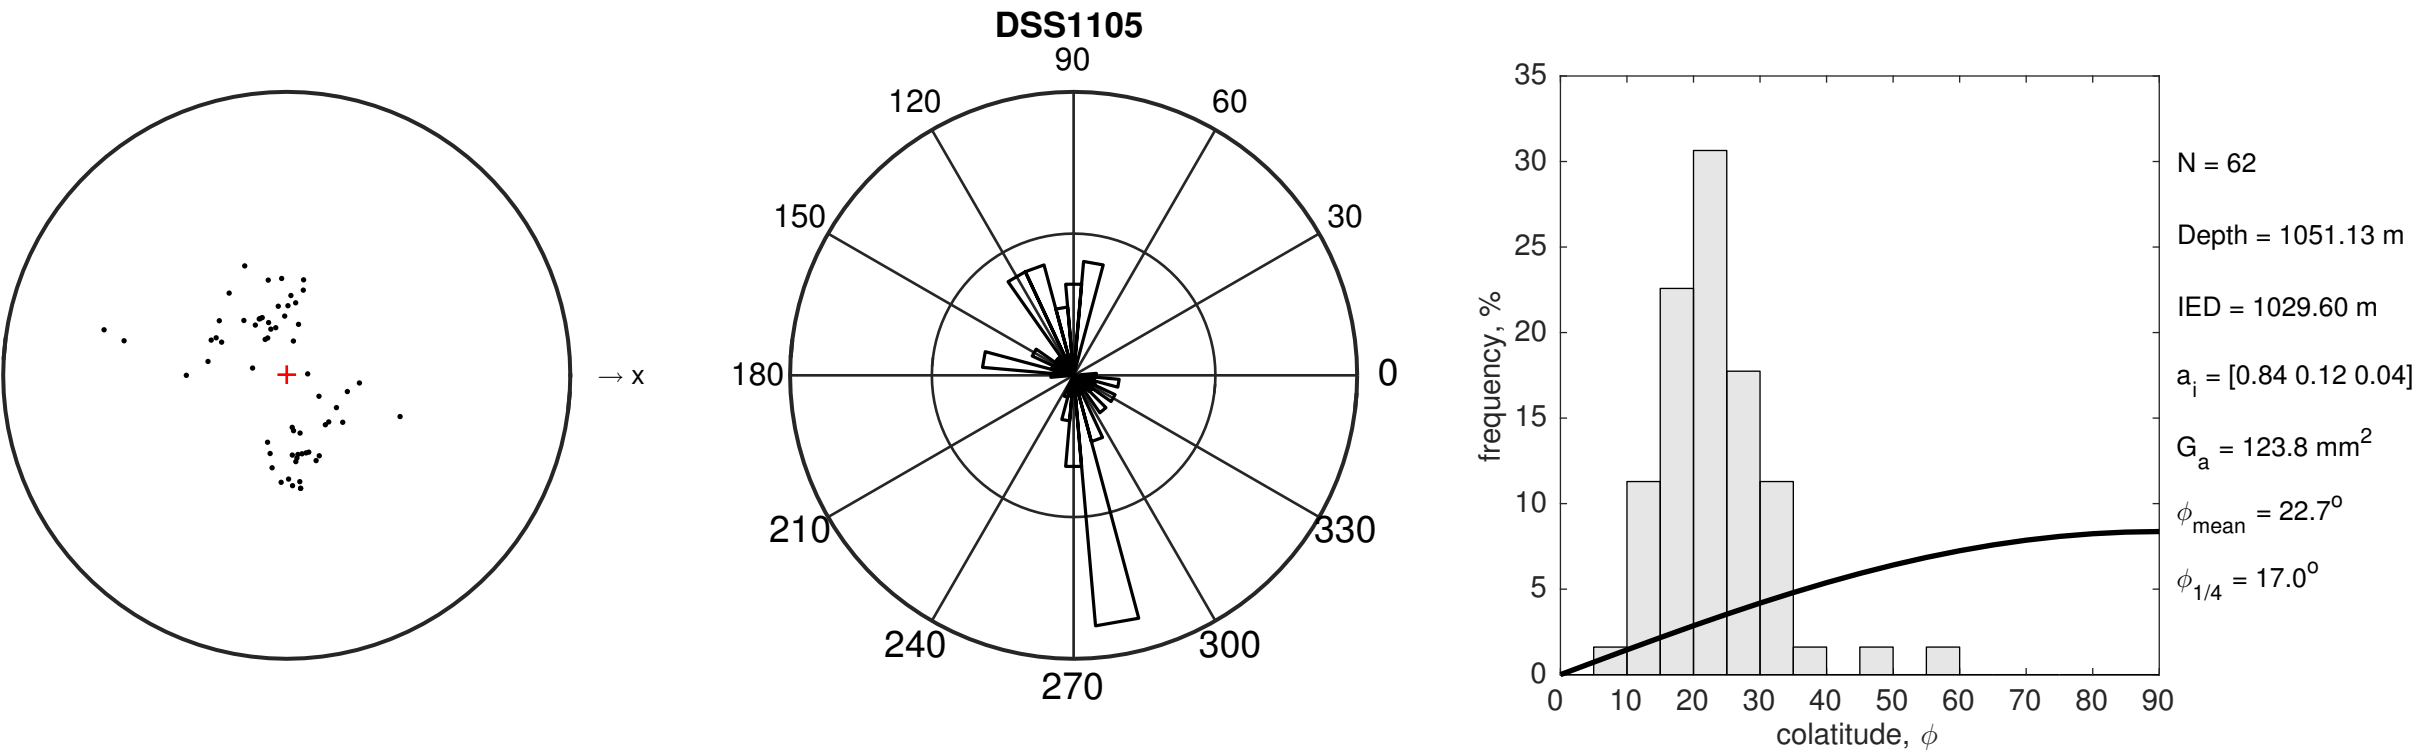

Supplement: Supplementary file 131 [file essd-2015-45-supplement.zip]

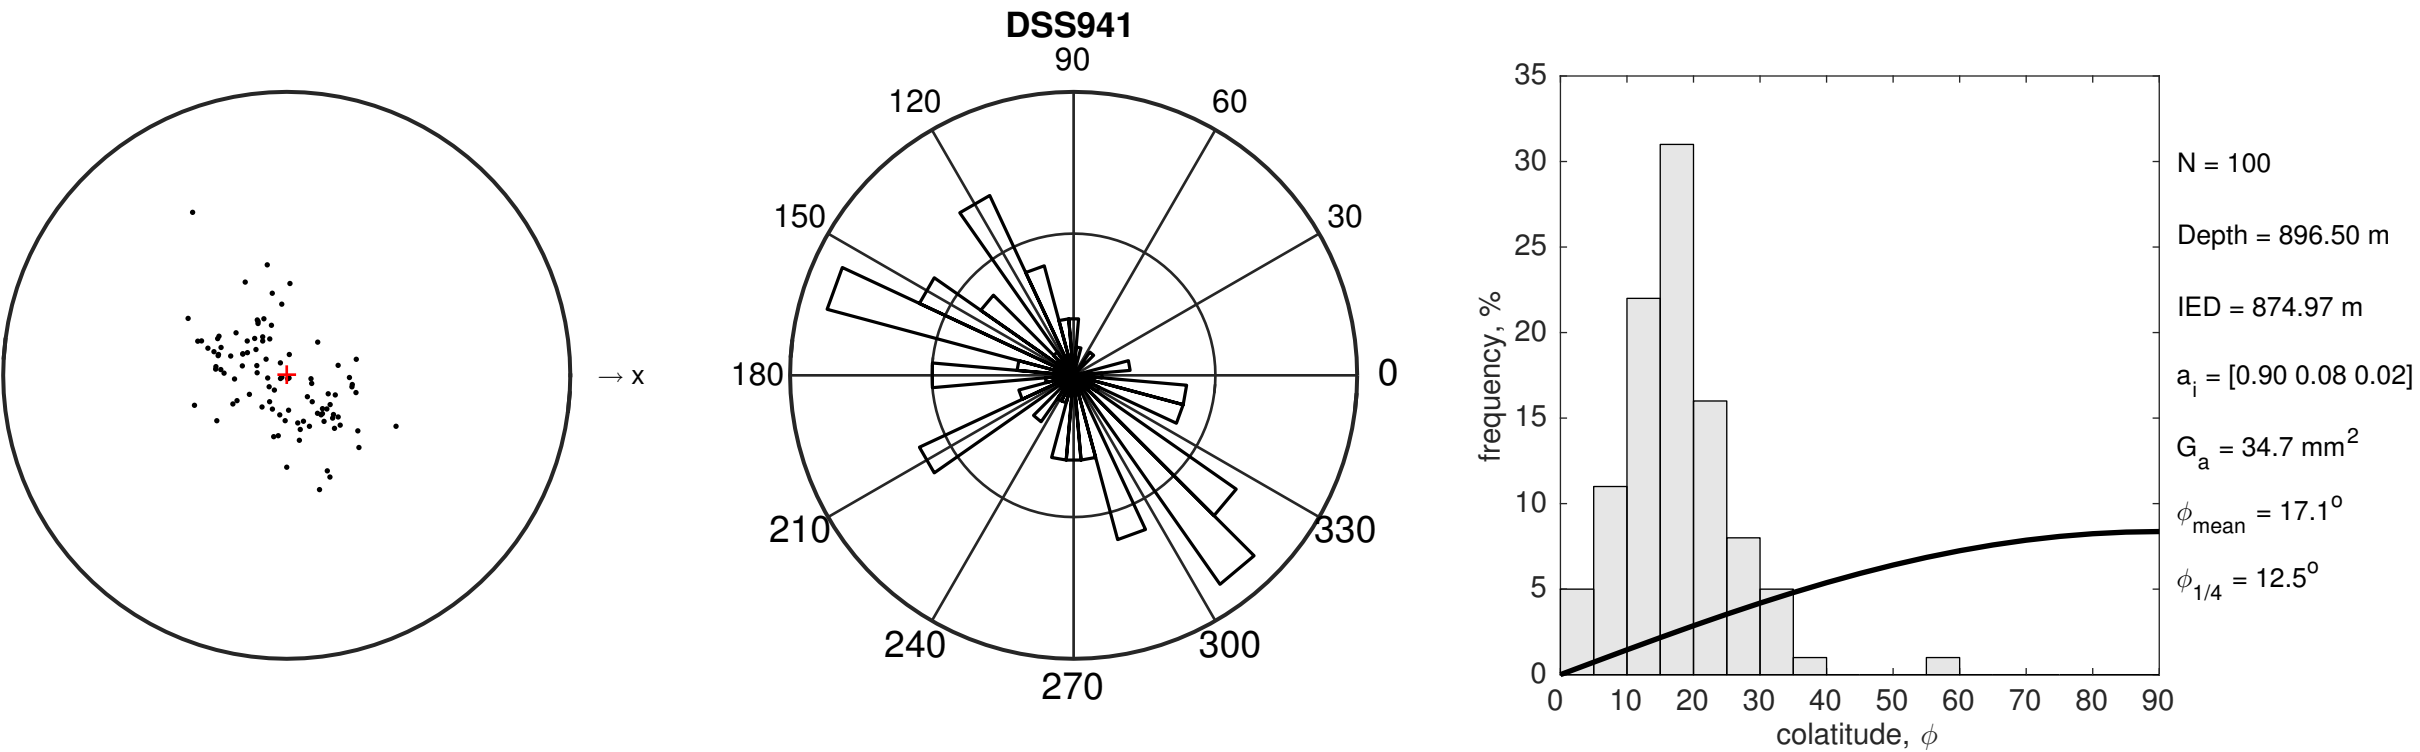

Supplement: Supplementary file 132 [file essd-2015-45-supplement.zip]

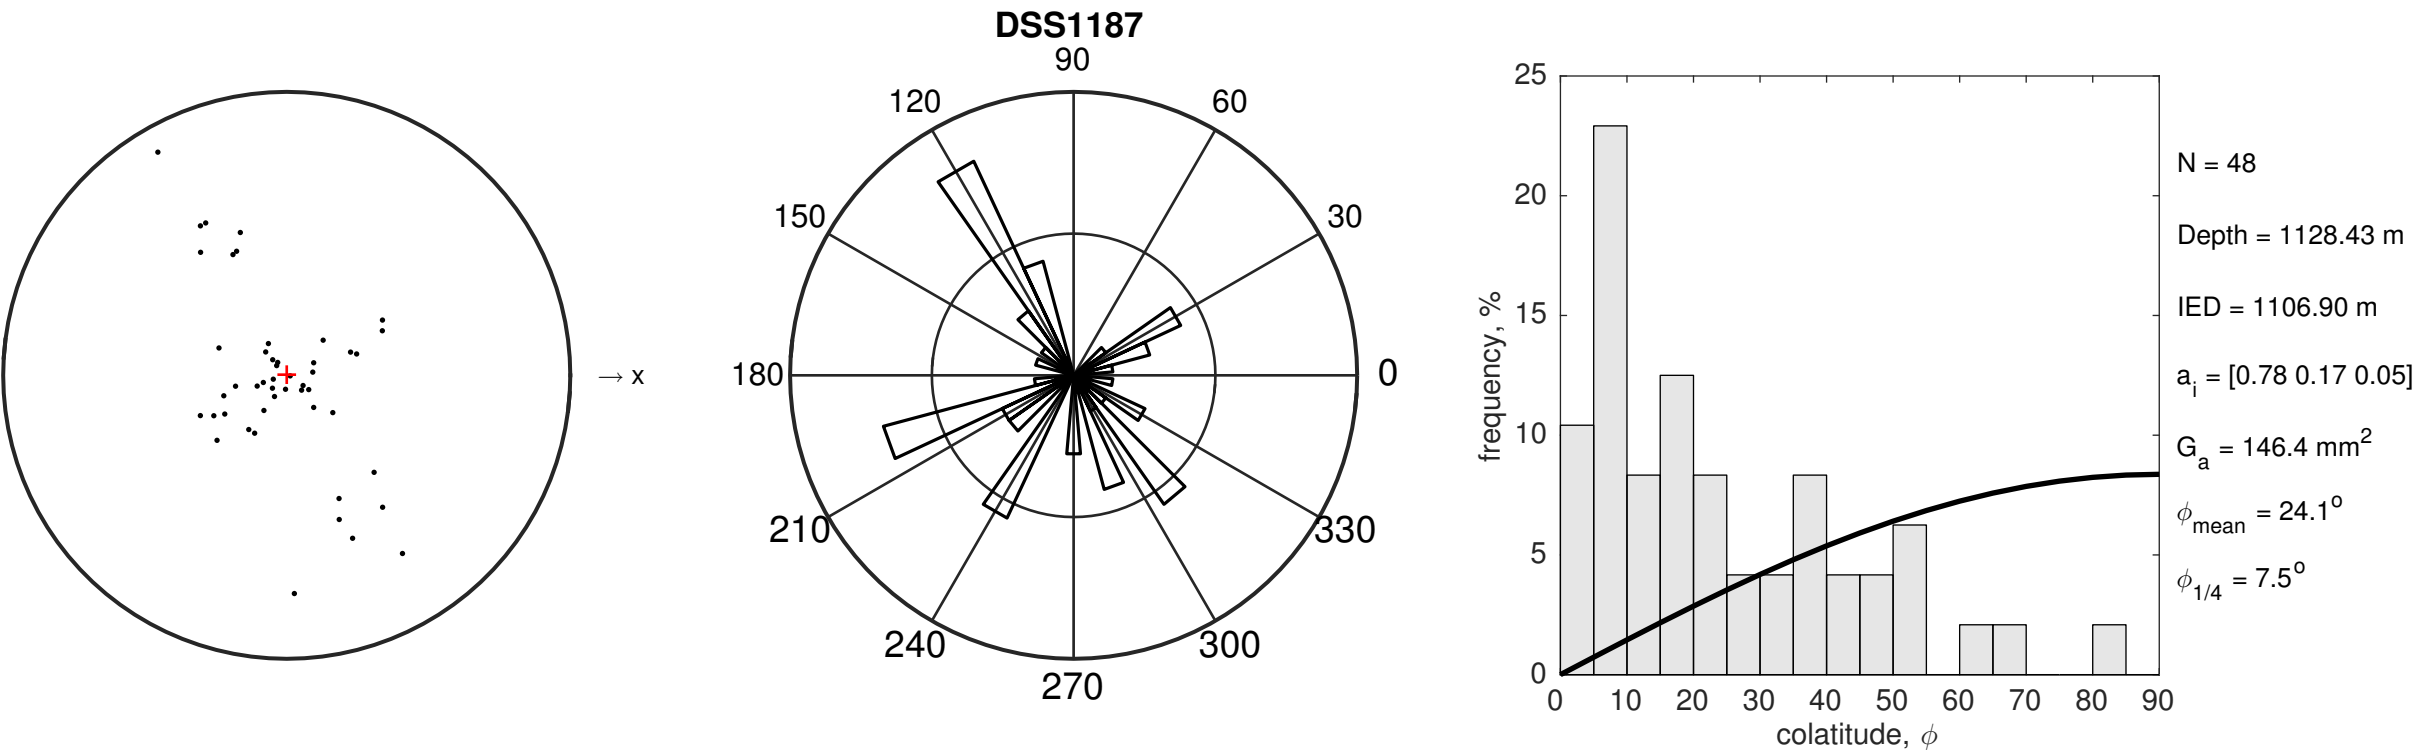

Supplement: Supplementary file 133 [file essd-2015-45-supplement.zip]

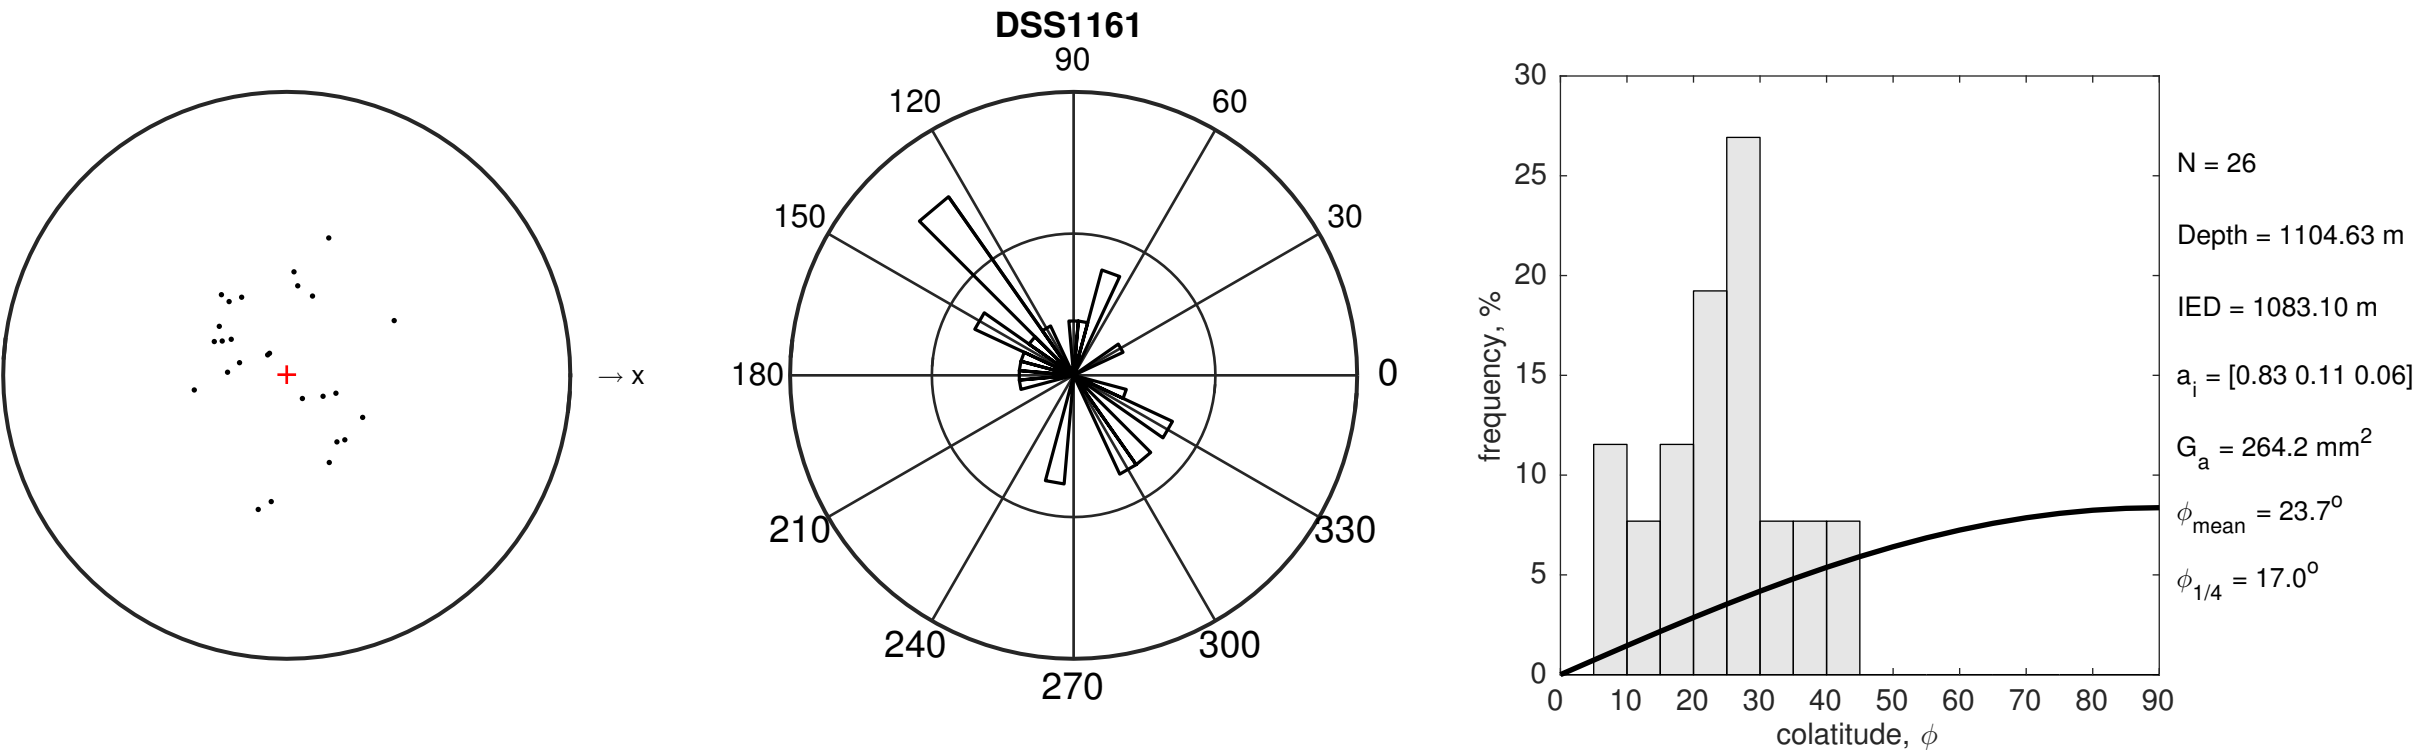

Supplement: Supplementary file 134 [file essd-2015-45-supplement.zip]

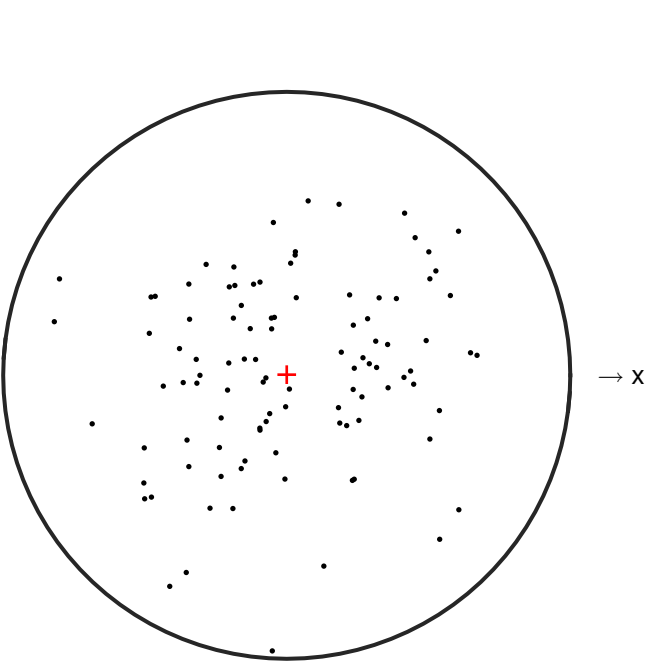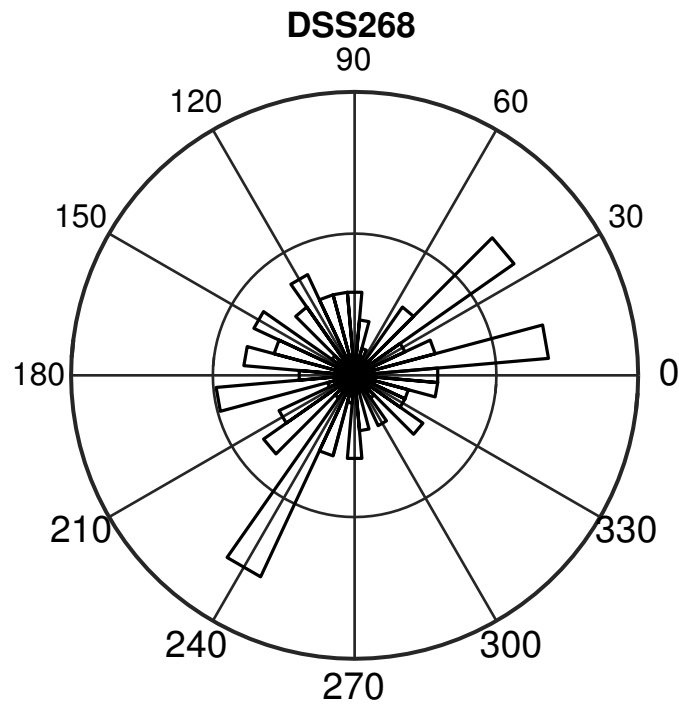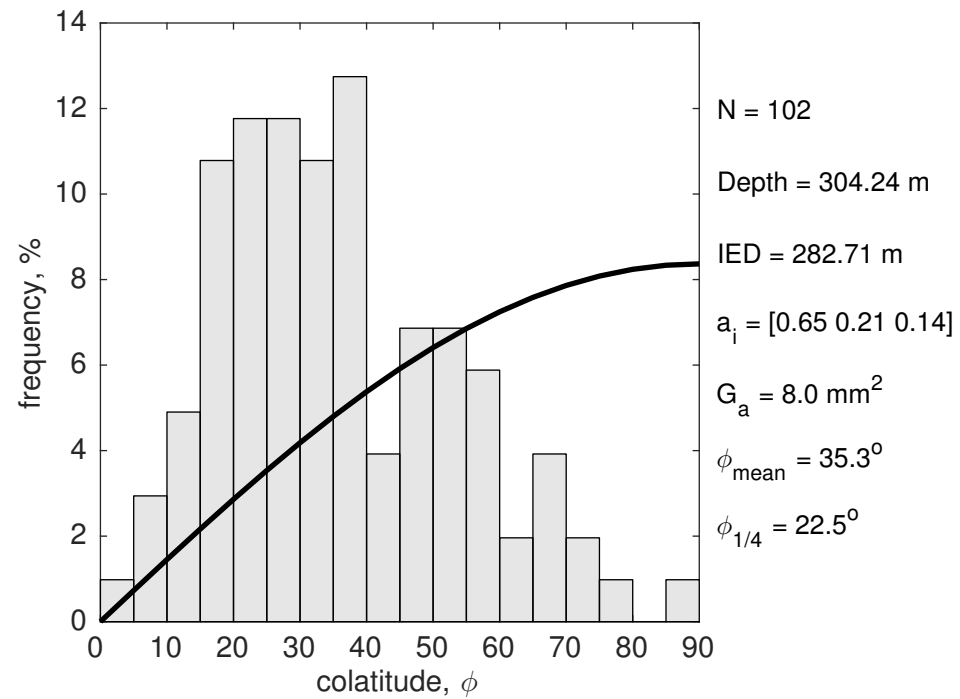

Supplement: Supplementary file 135 [file essd-2015-45-supplement.zip]

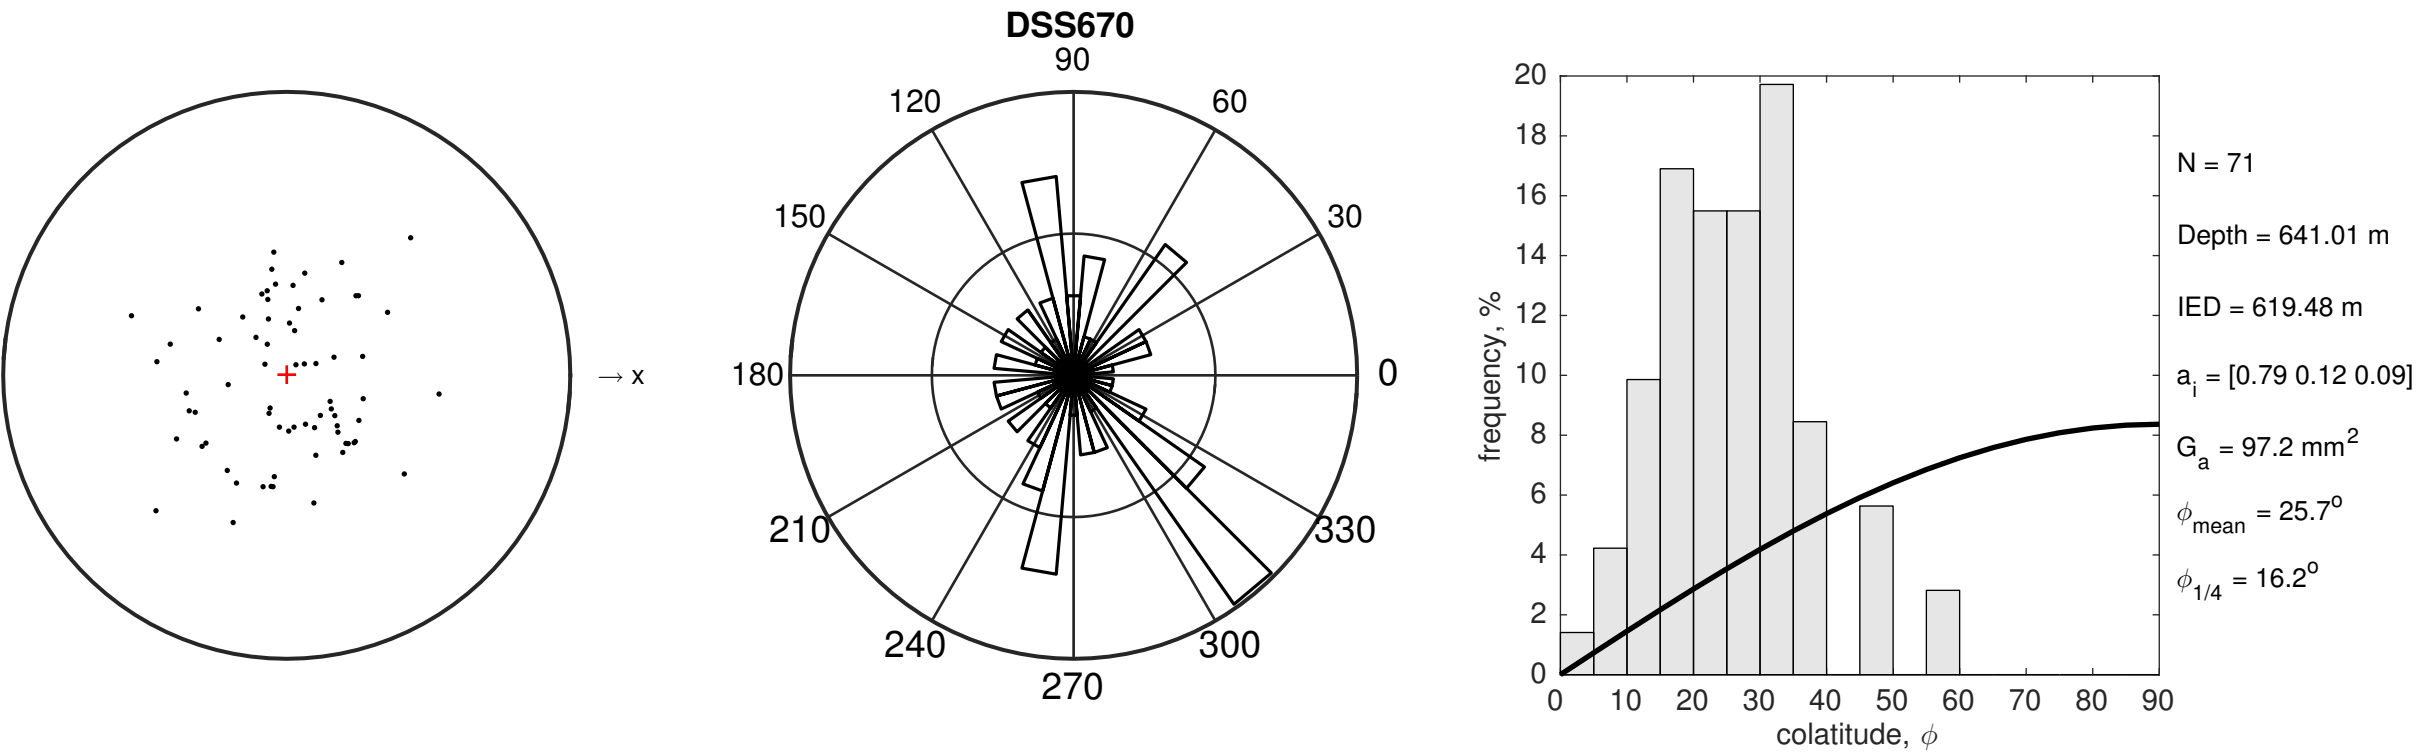

Supplement: Supplementary file 136 [file essd-2015-45-supplement.zip]

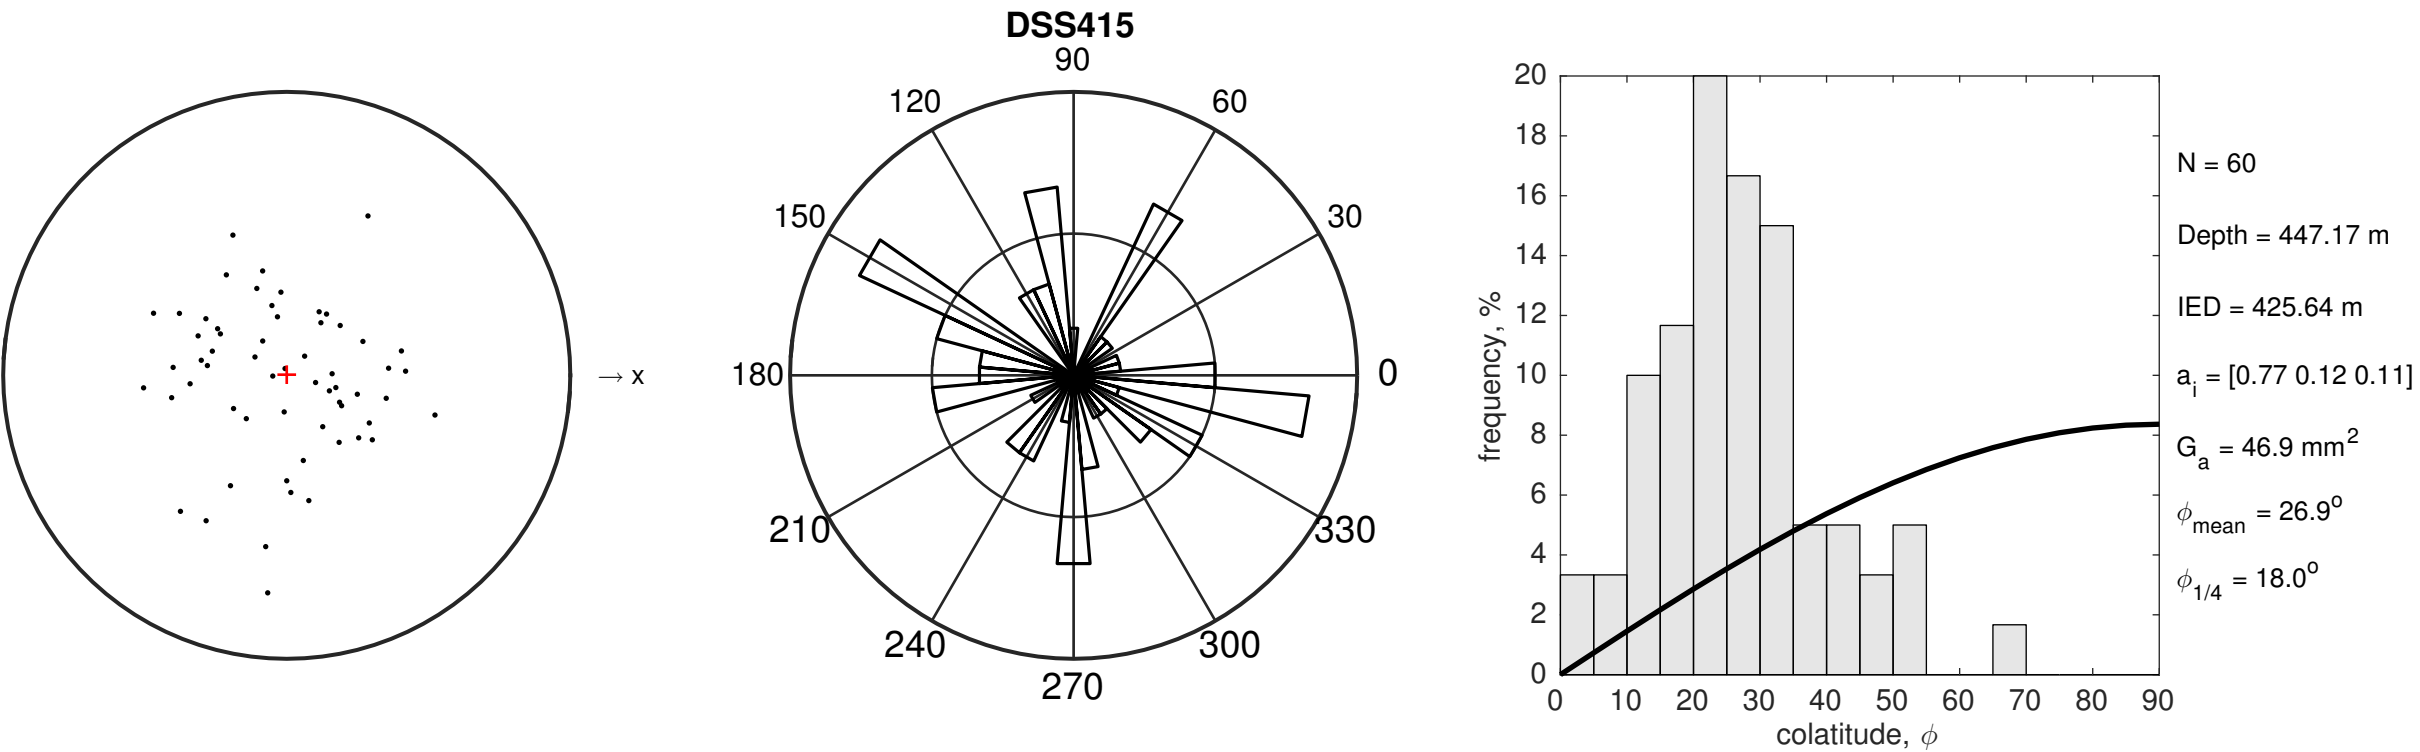

Supplement: Supplementary file 137 [file essd-2015-45-supplement.zip]

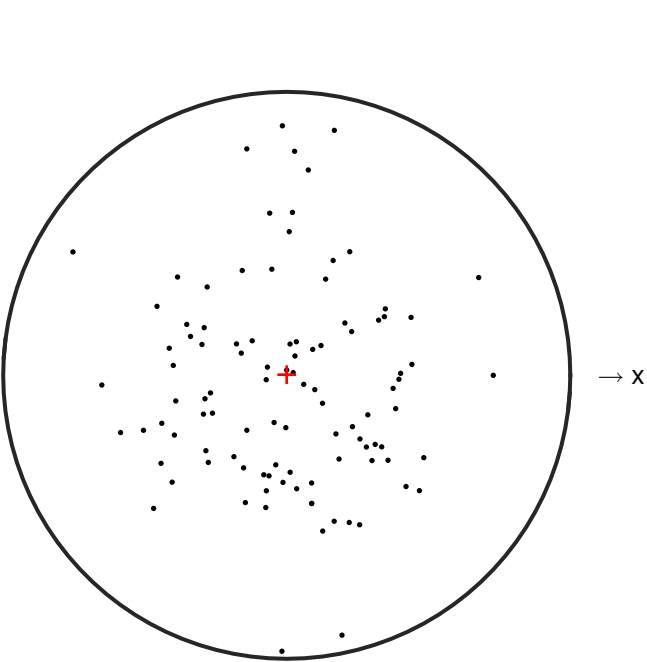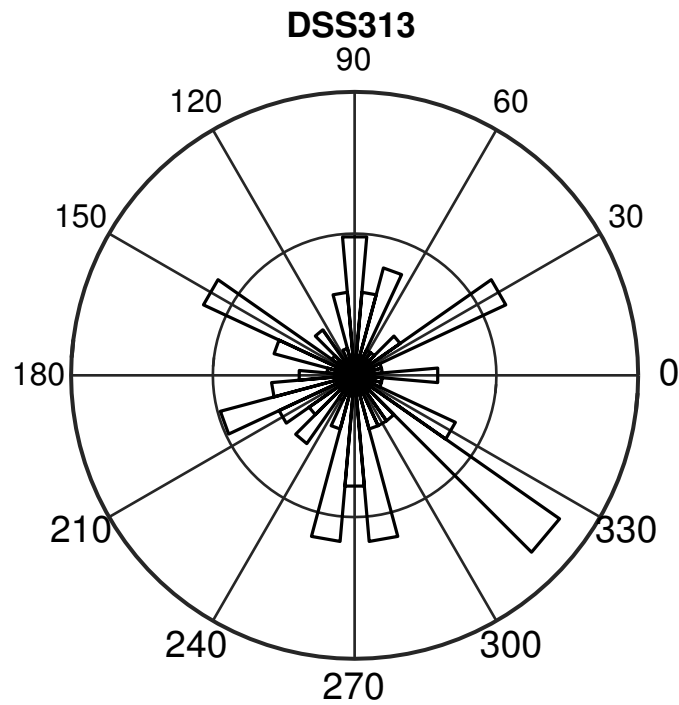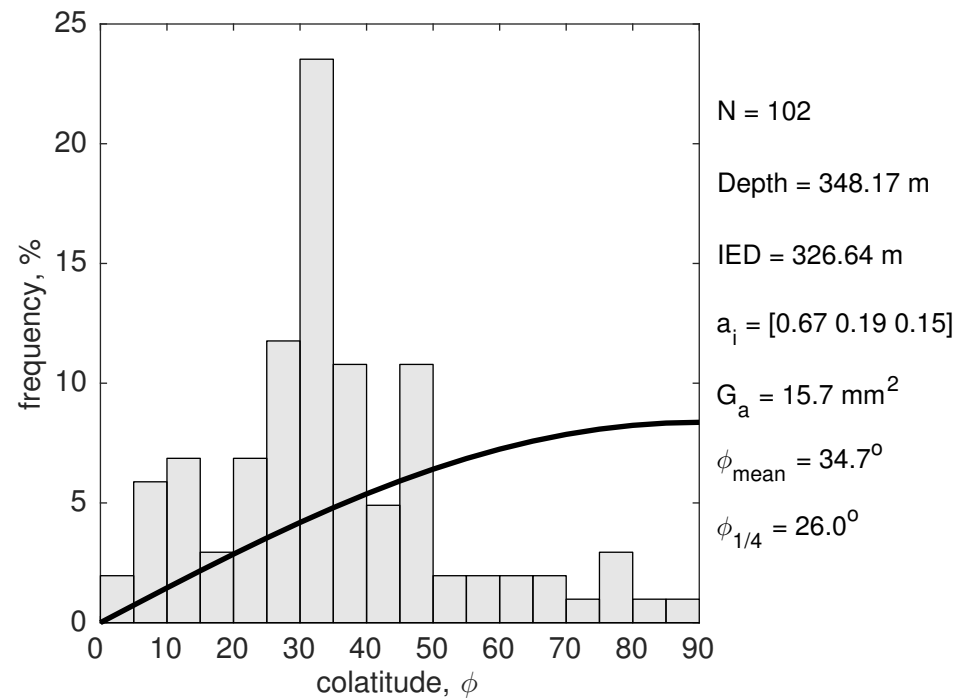

Supplement: Supplementary file 138 [file essd-2015-45-supplement.zip]

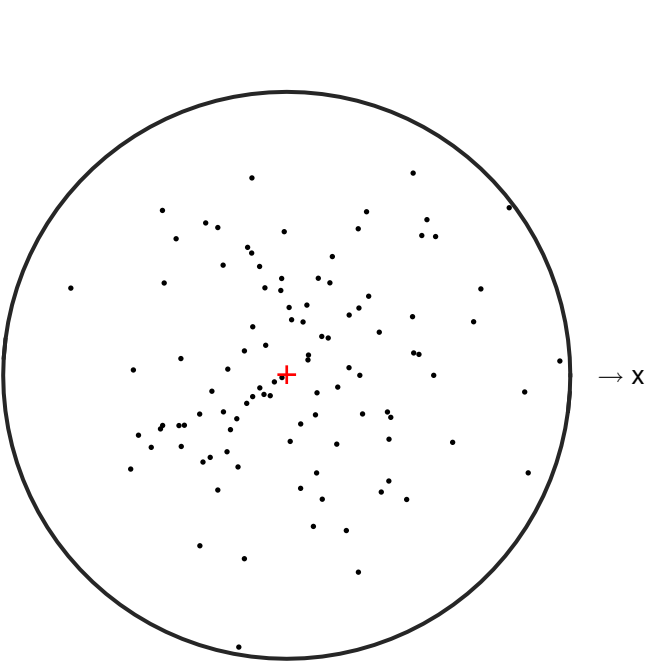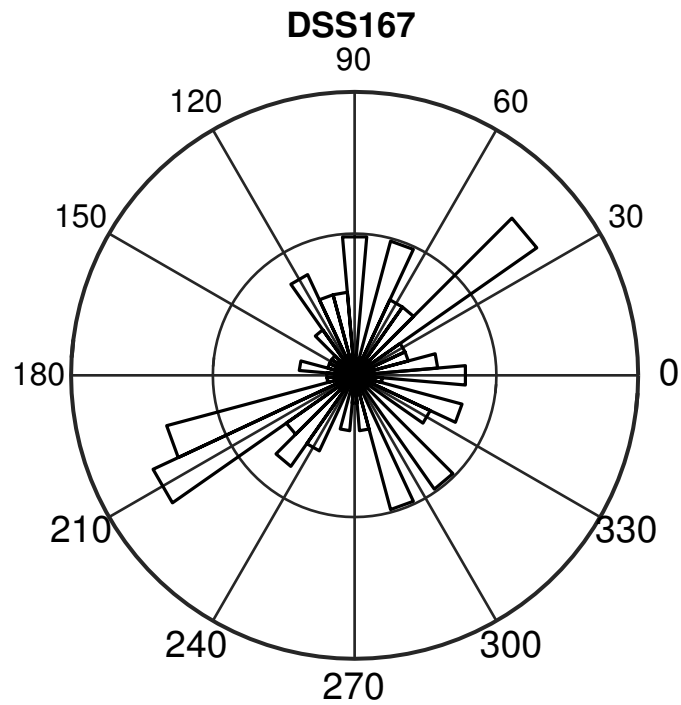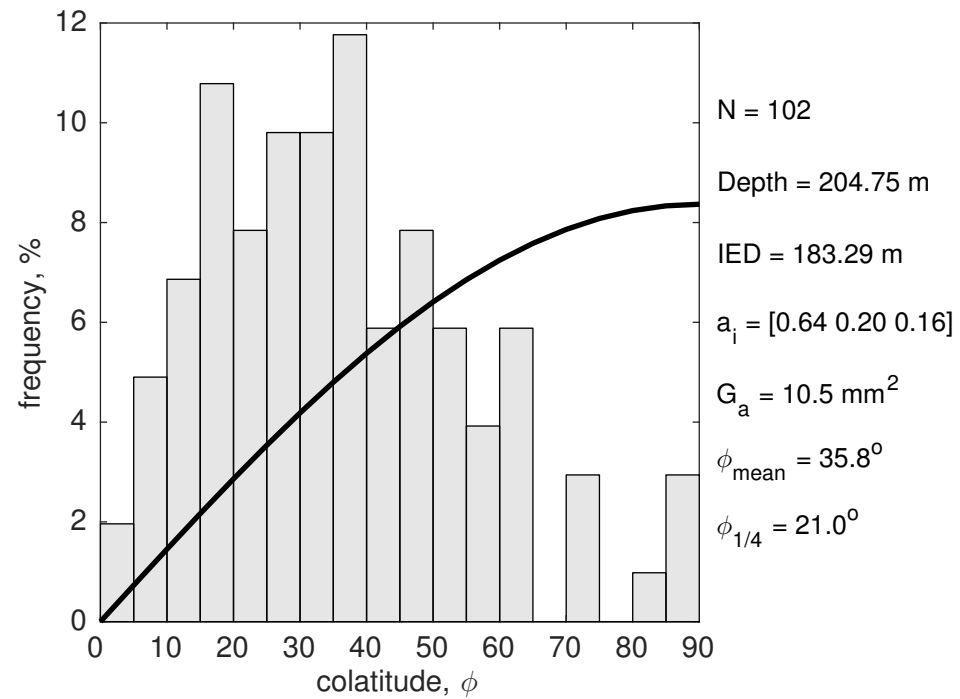

Supplement: Supplementary file 139 [file essd-2015-45-supplement.zip]

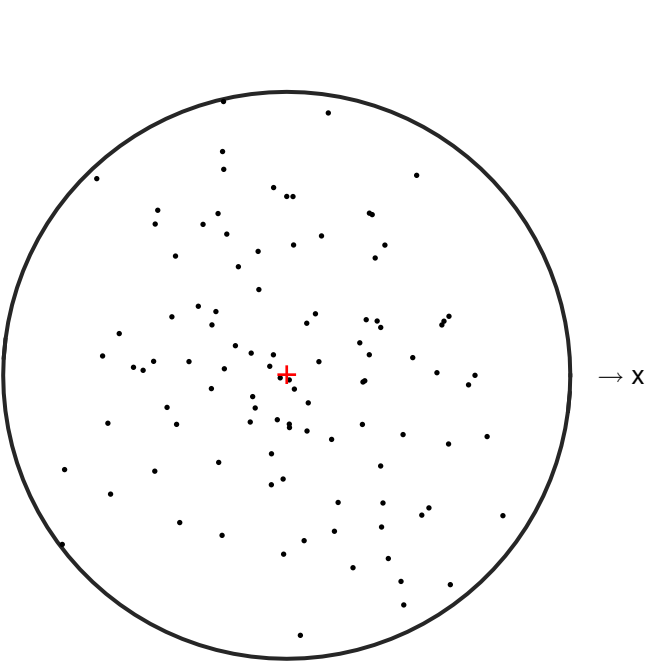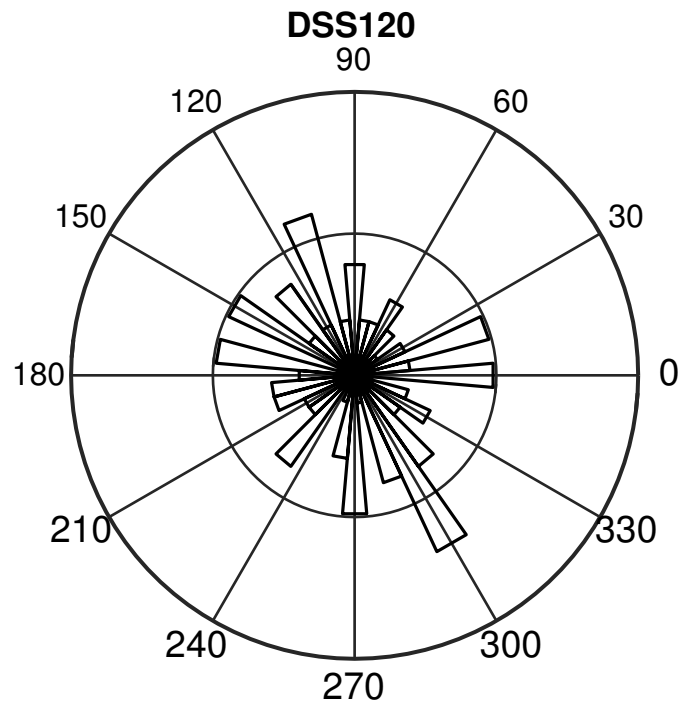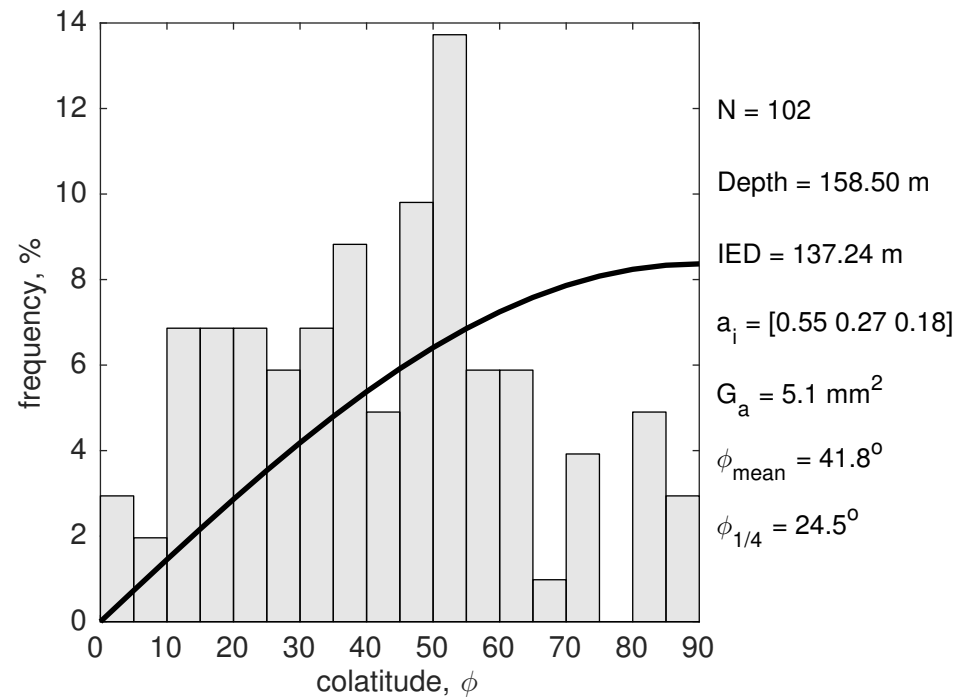

Supplement: Supplementary file 140 [file essd-2015-45-supplement.zip]

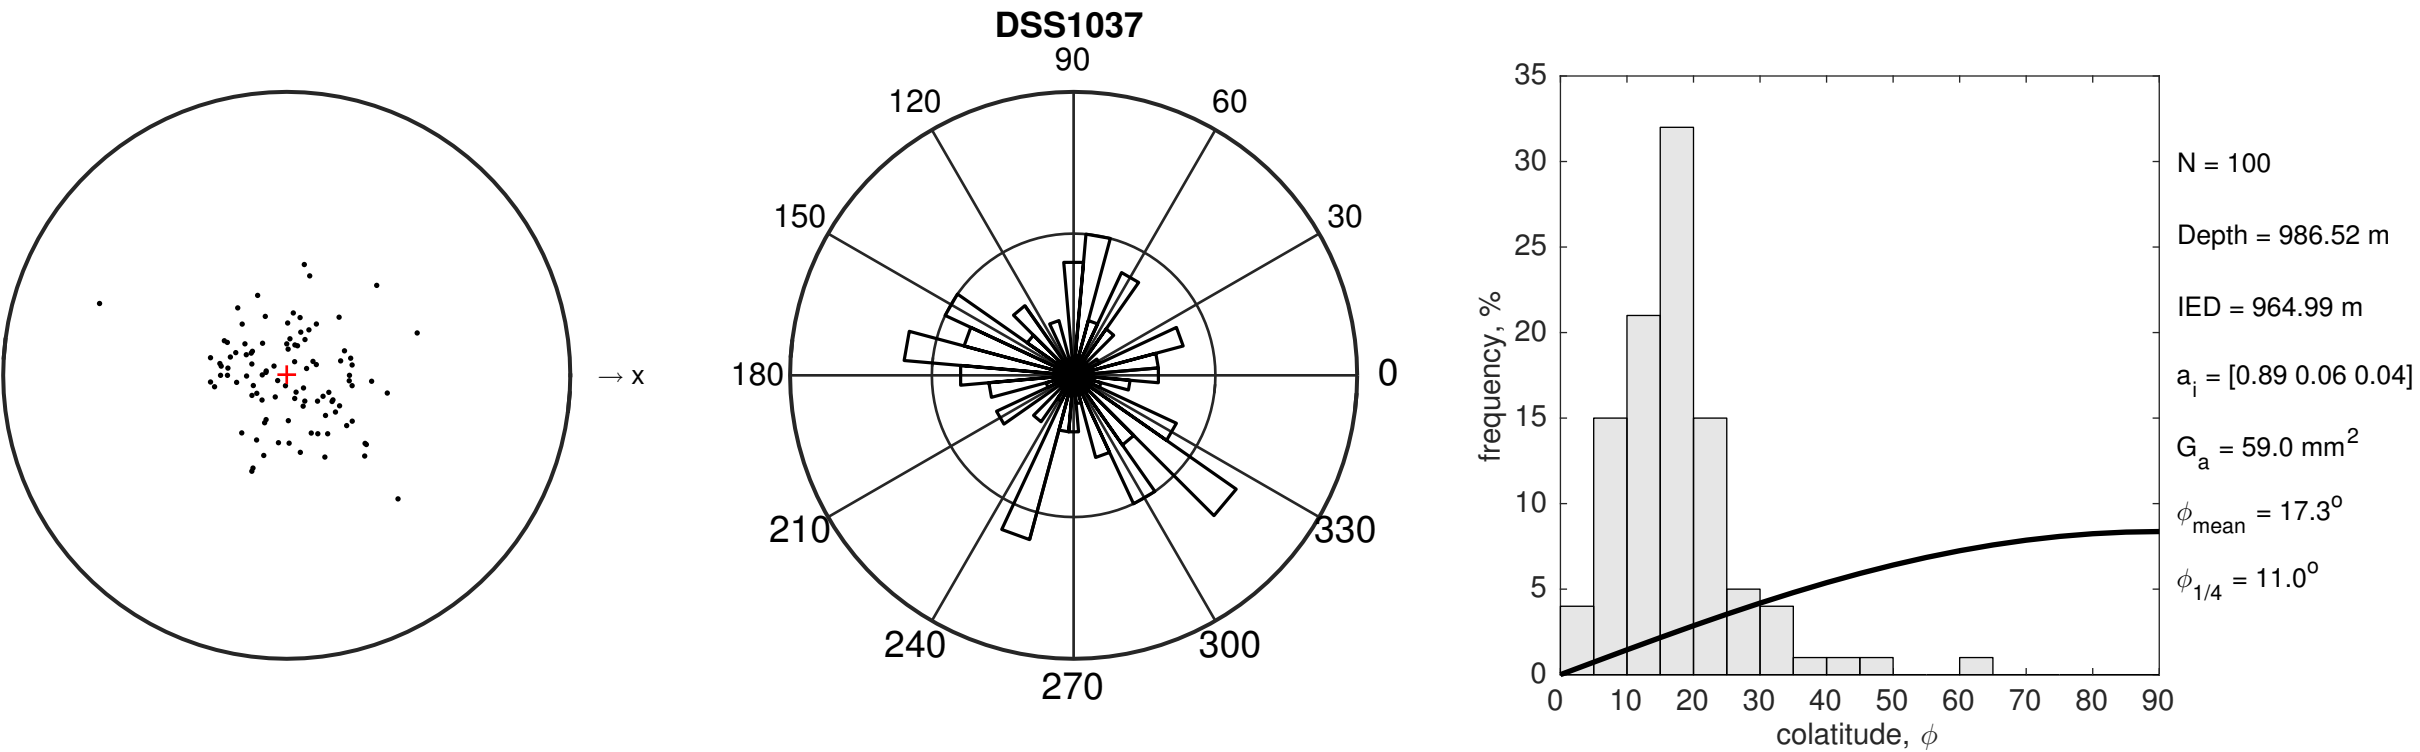

Supplement: Supplementary file 141 [file essd-2015-45-supplement.zip]

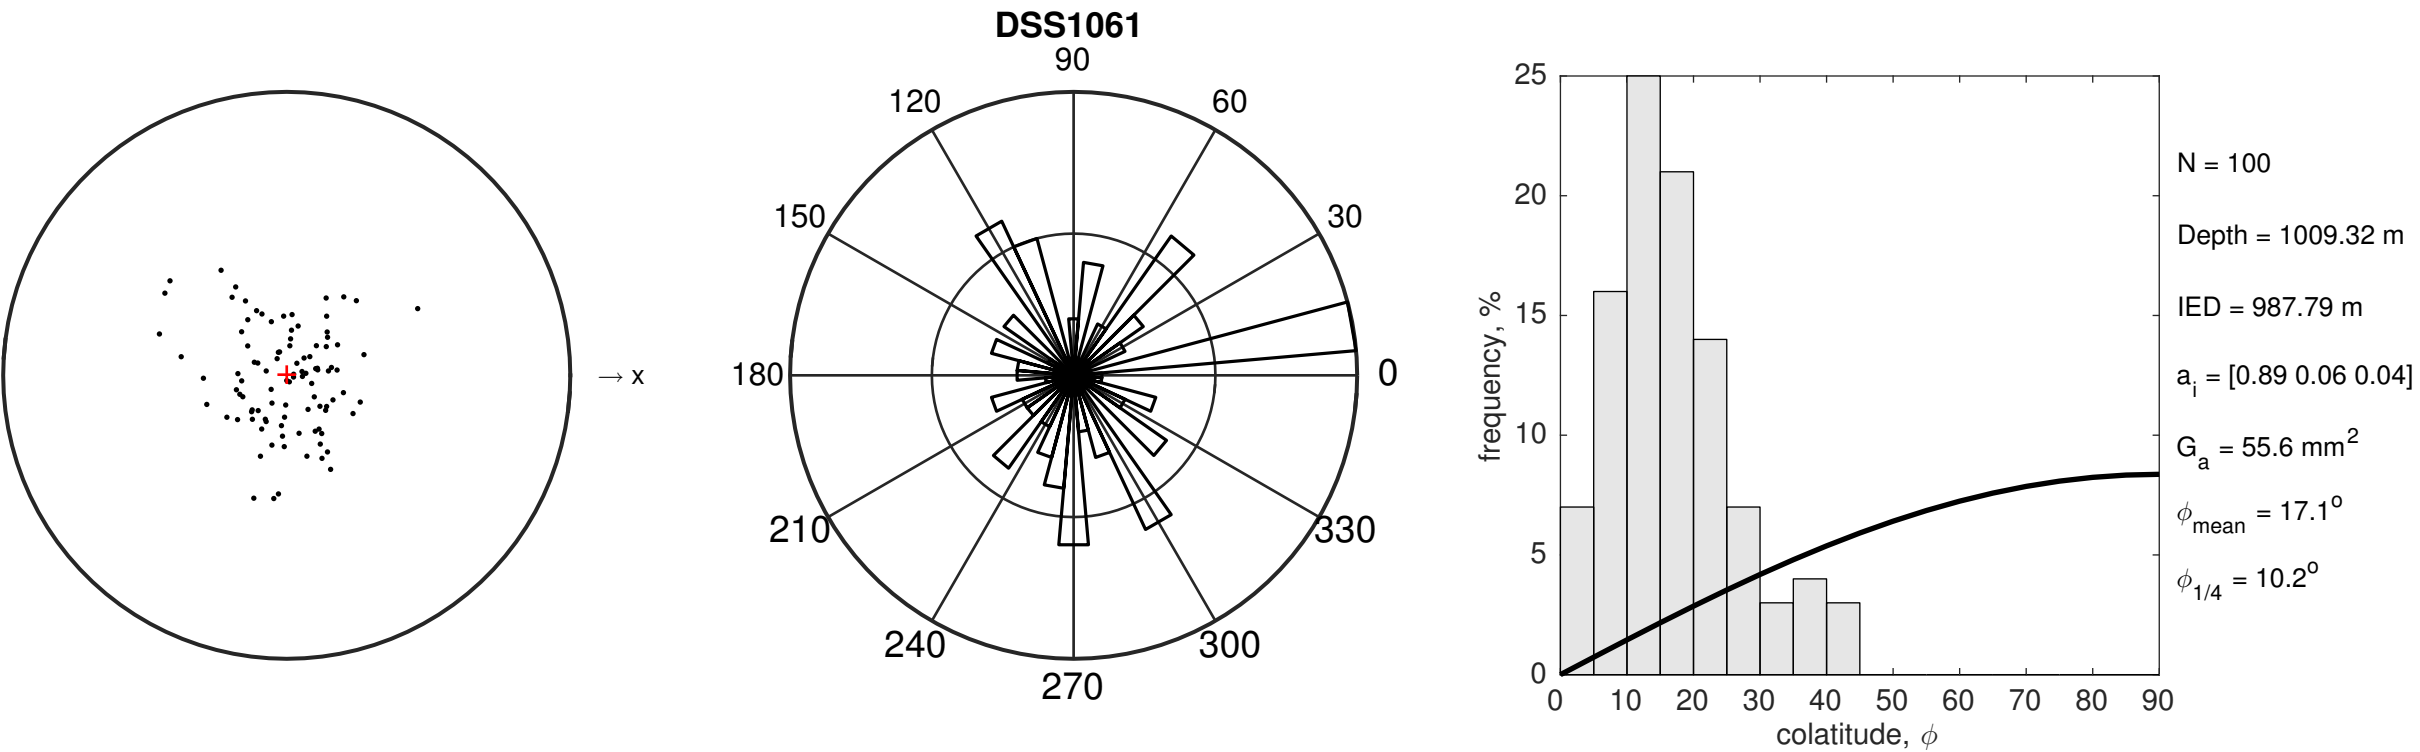

Supplement: Supplementary file 142 [file essd-2015-45-supplement.zip]

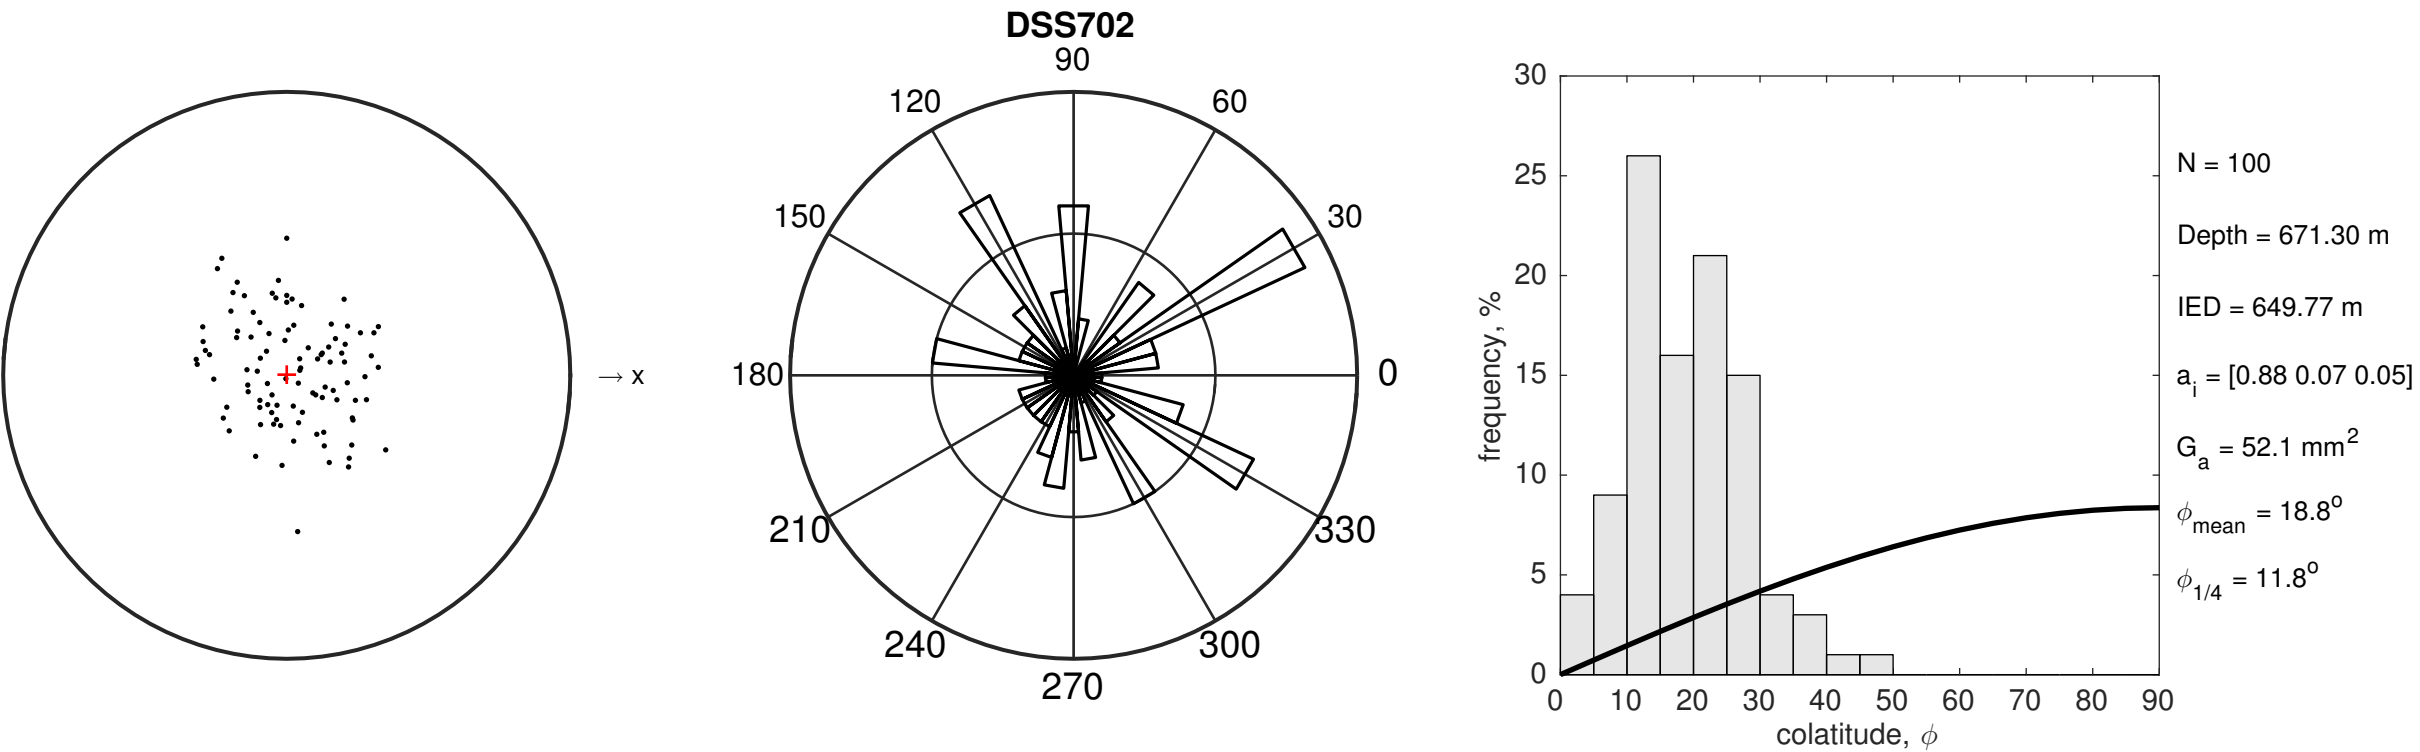

Supplement: Supplementary file 143 [file essd-2015-45-supplement.zip]

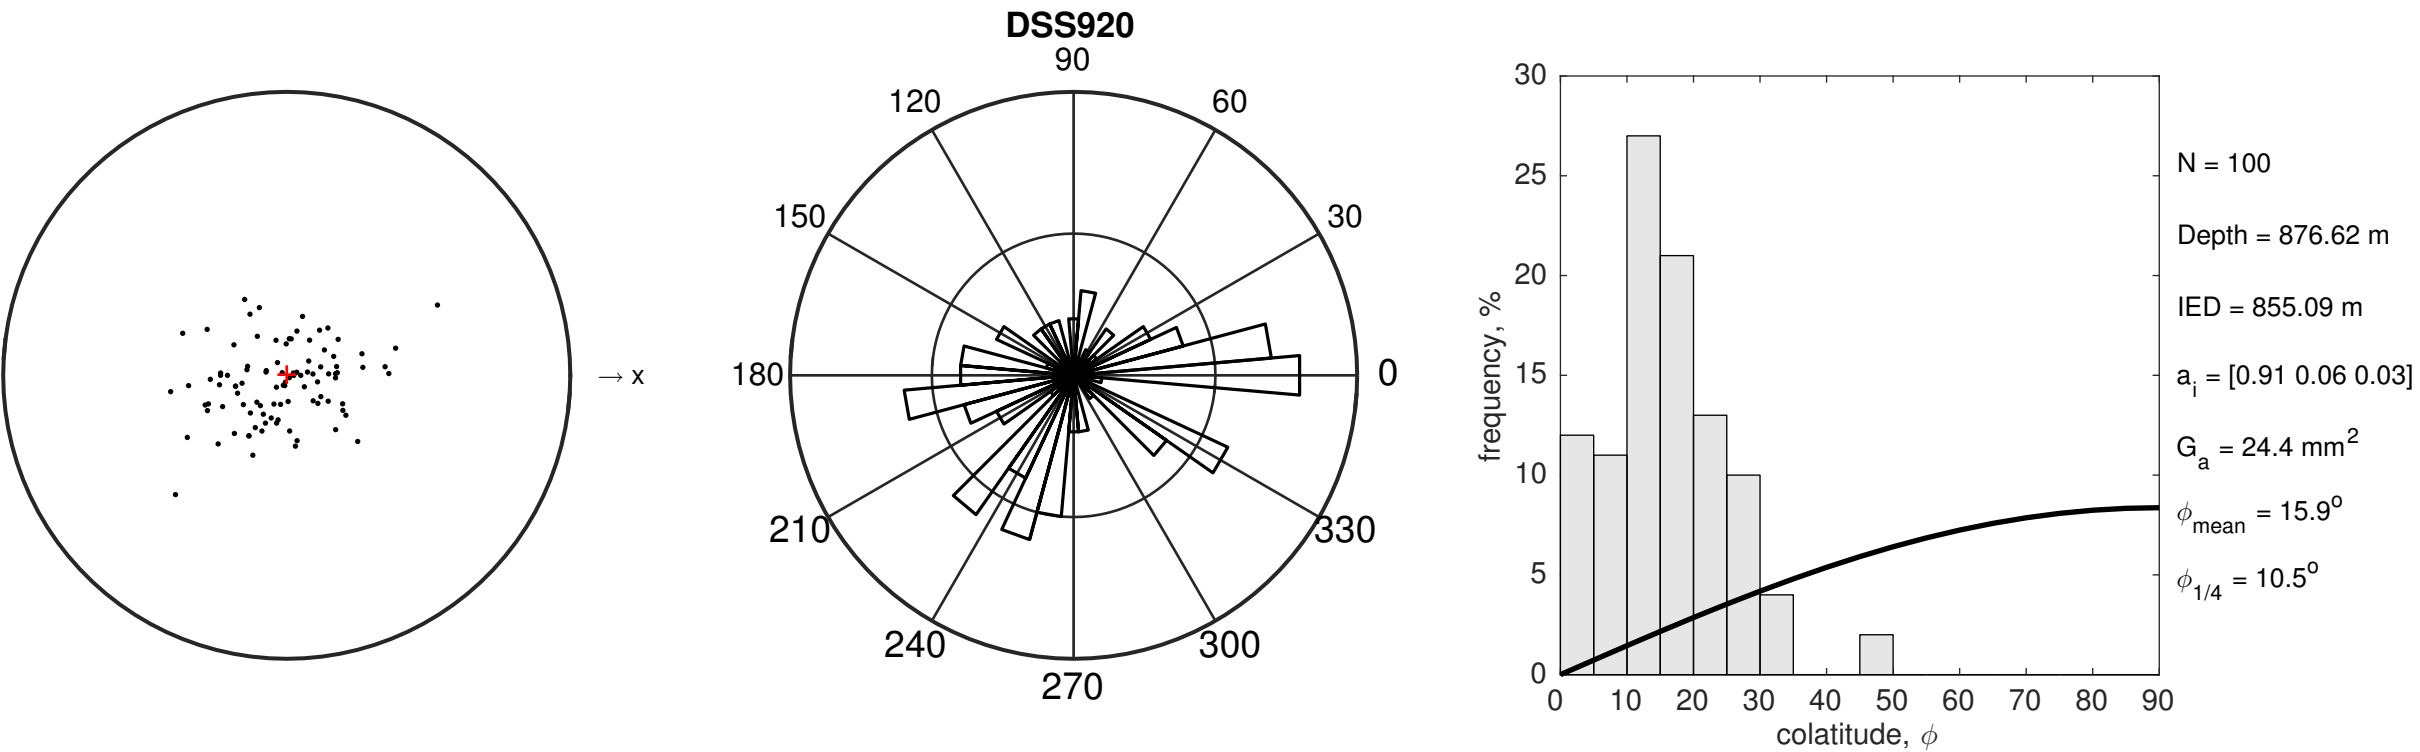

Supplement: Supplementary file 144 [file essd-2015-45-supplement.zip]

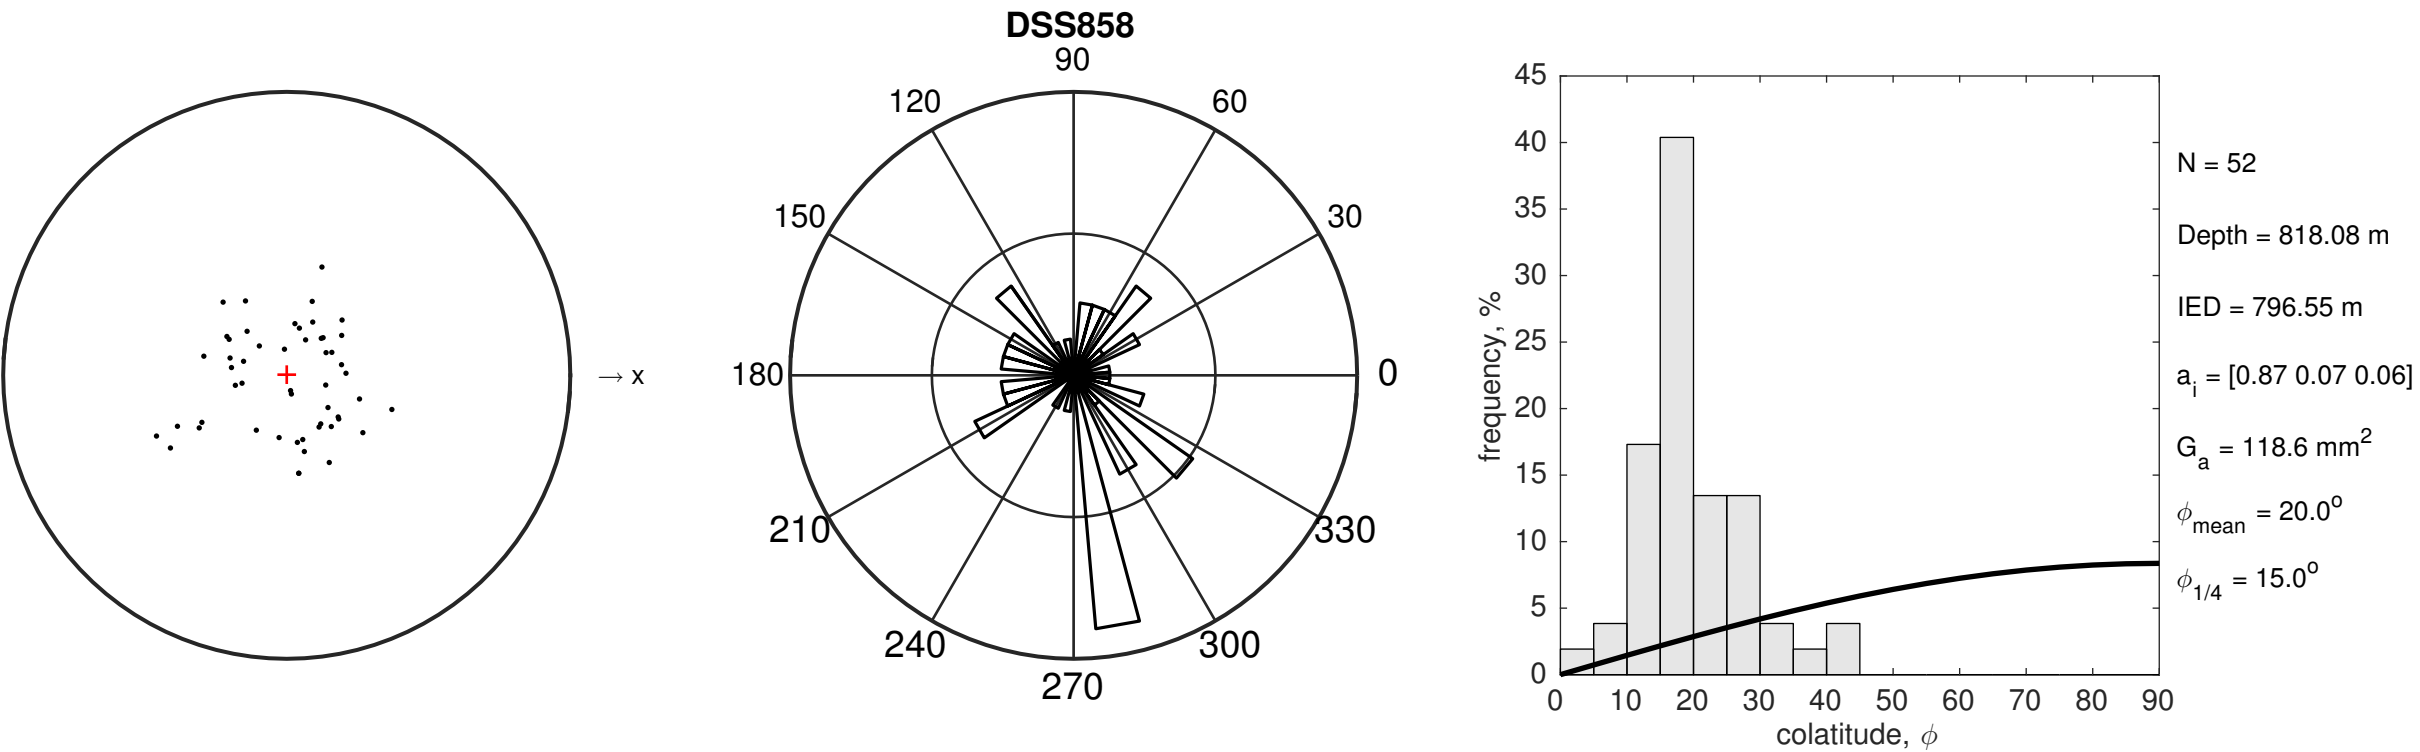

Supplement: Supplementary file 145 [file essd-2015-45-supplement.zip]

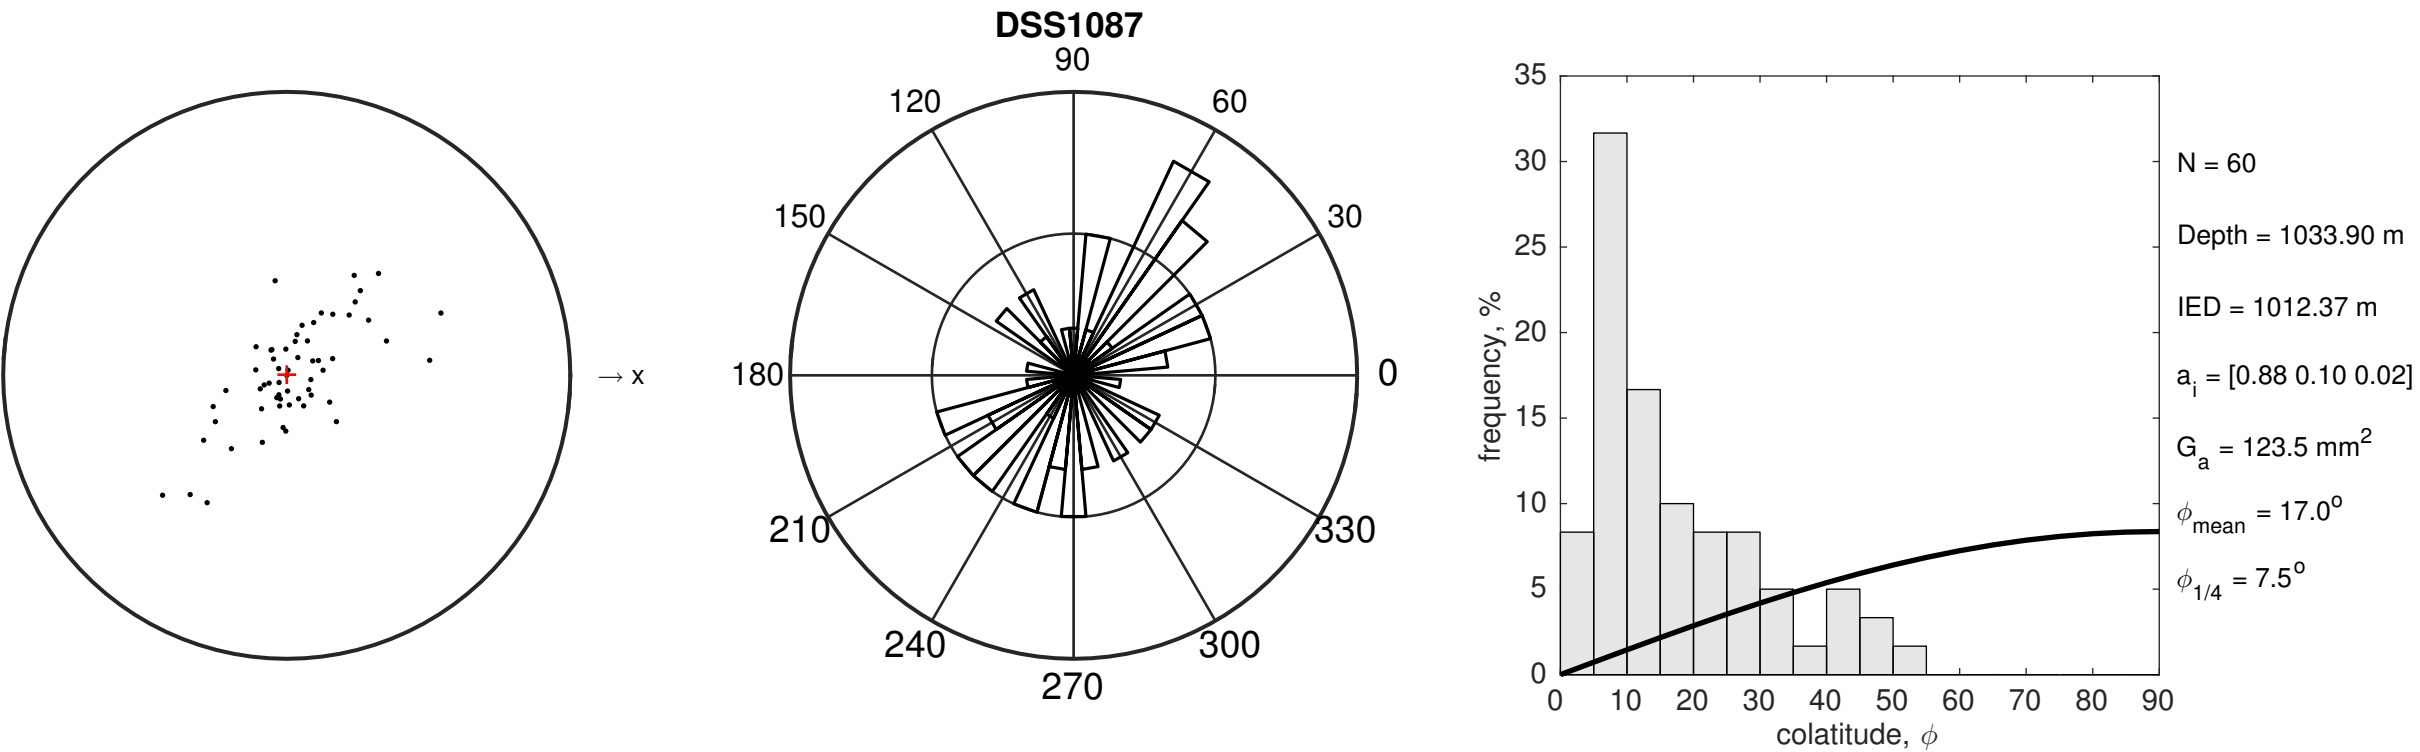

Supplement: Supplementary file 146 [file essd-2015-45-supplement.zip]

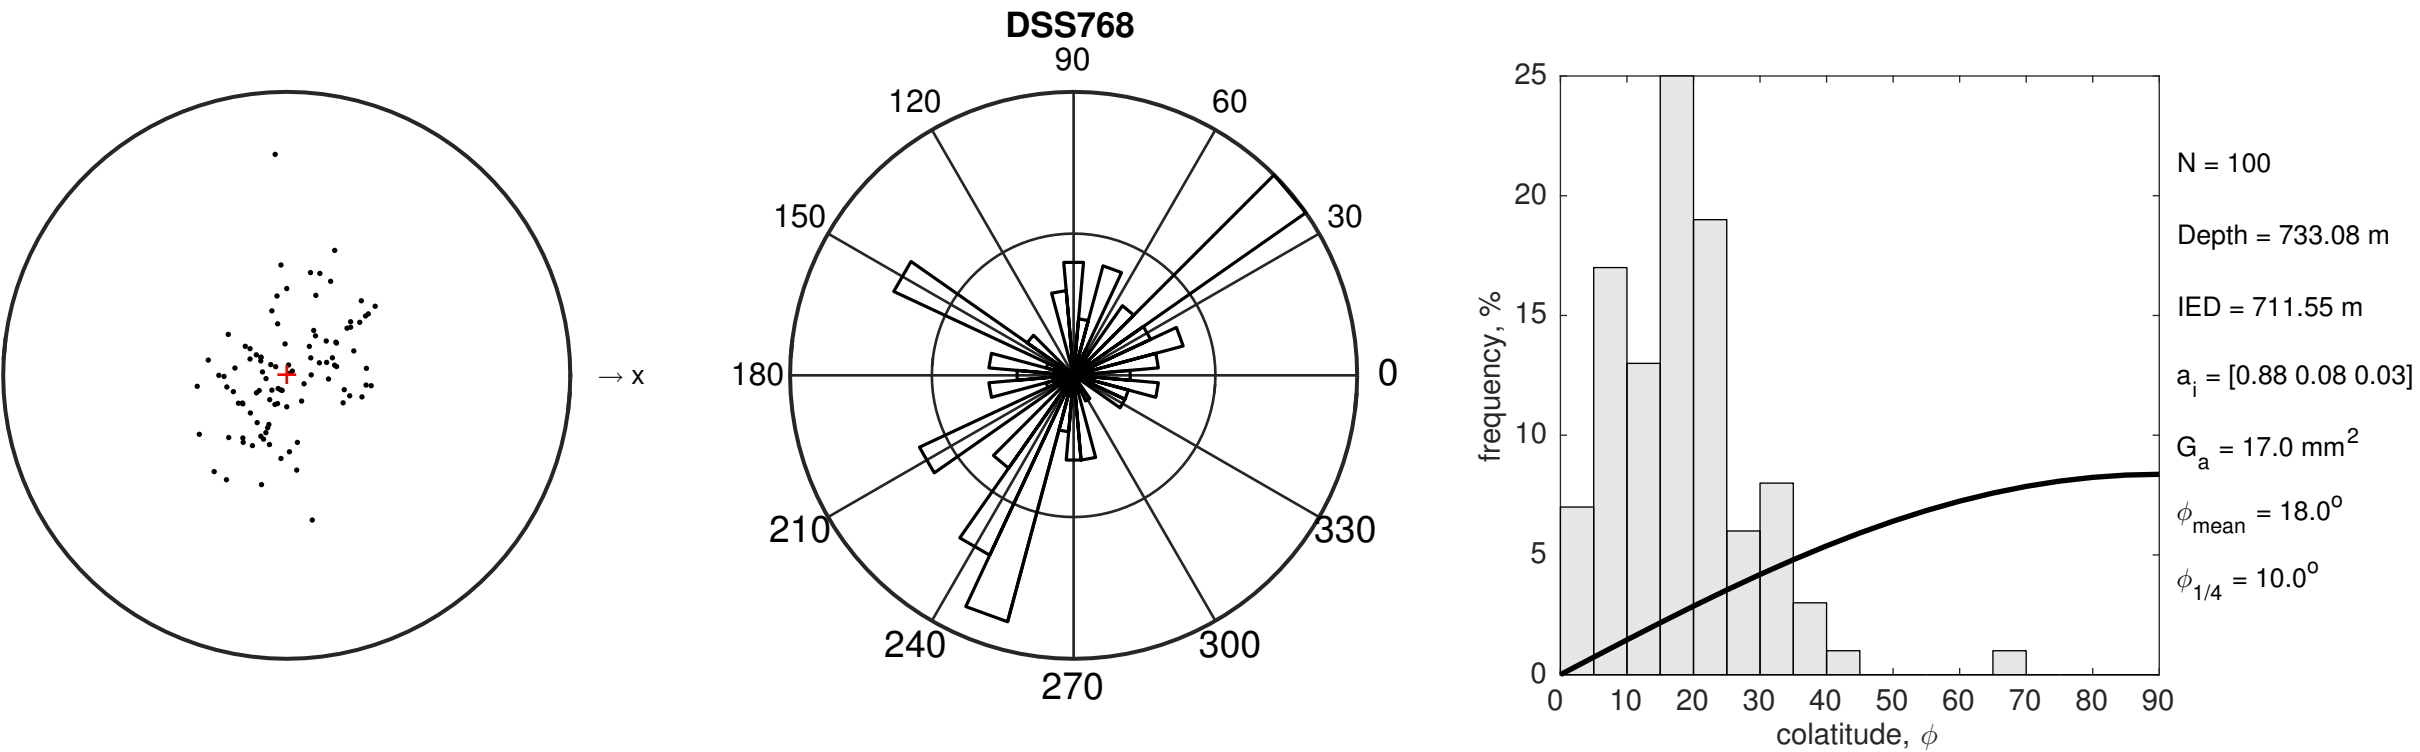

Supplement: Supplementary file 147 [file essd-2015-45-supplement.zip]

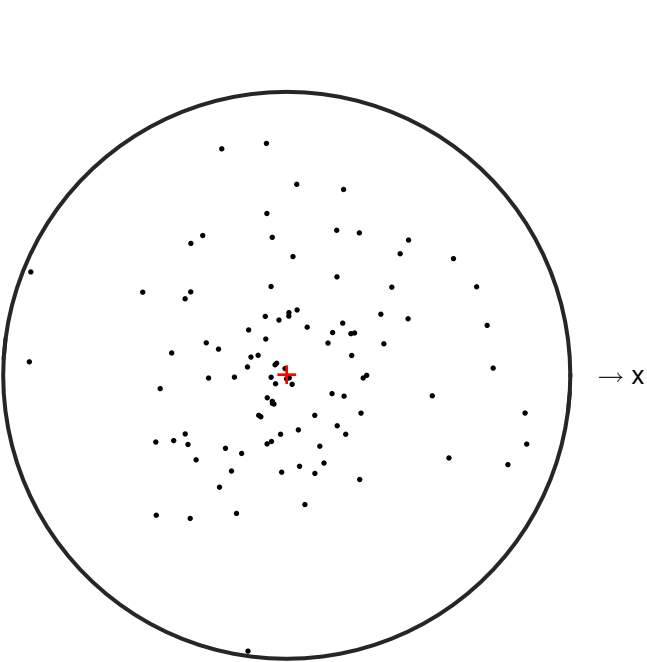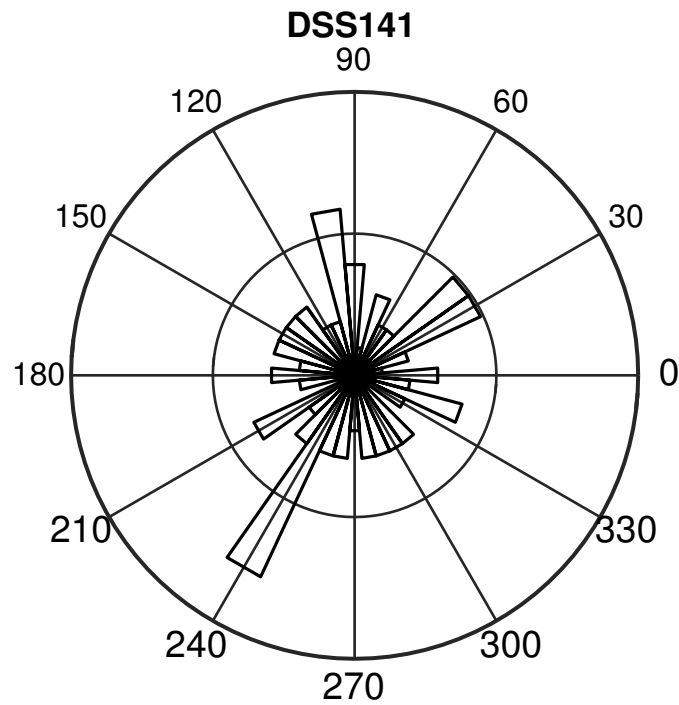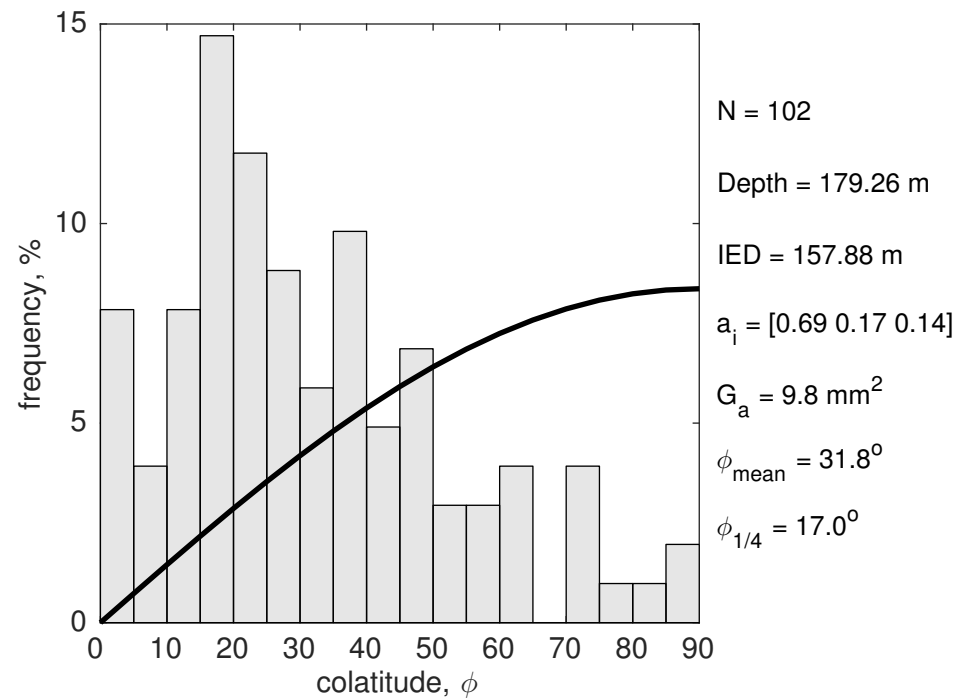

Supplement: Supplementary file 148 [file essd-2015-45-supplement.zip]

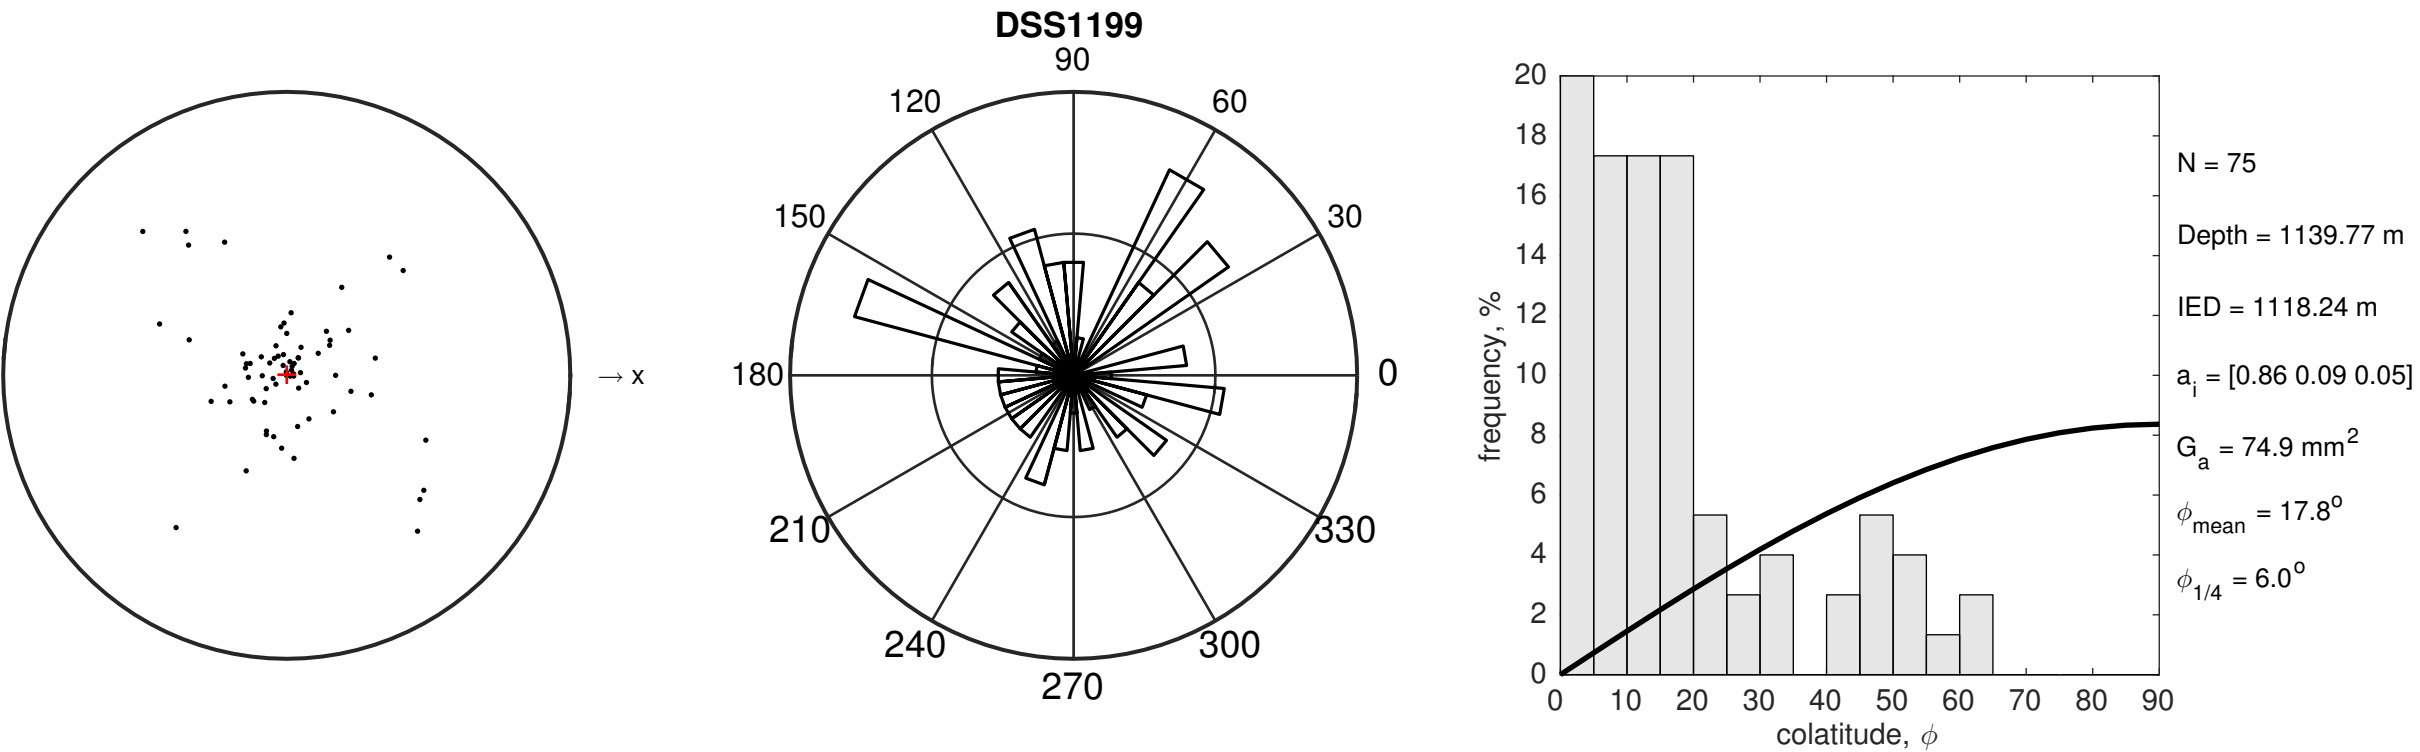

Supplement: Supplementary file 149 [file essd-2015-45-supplement.zip]

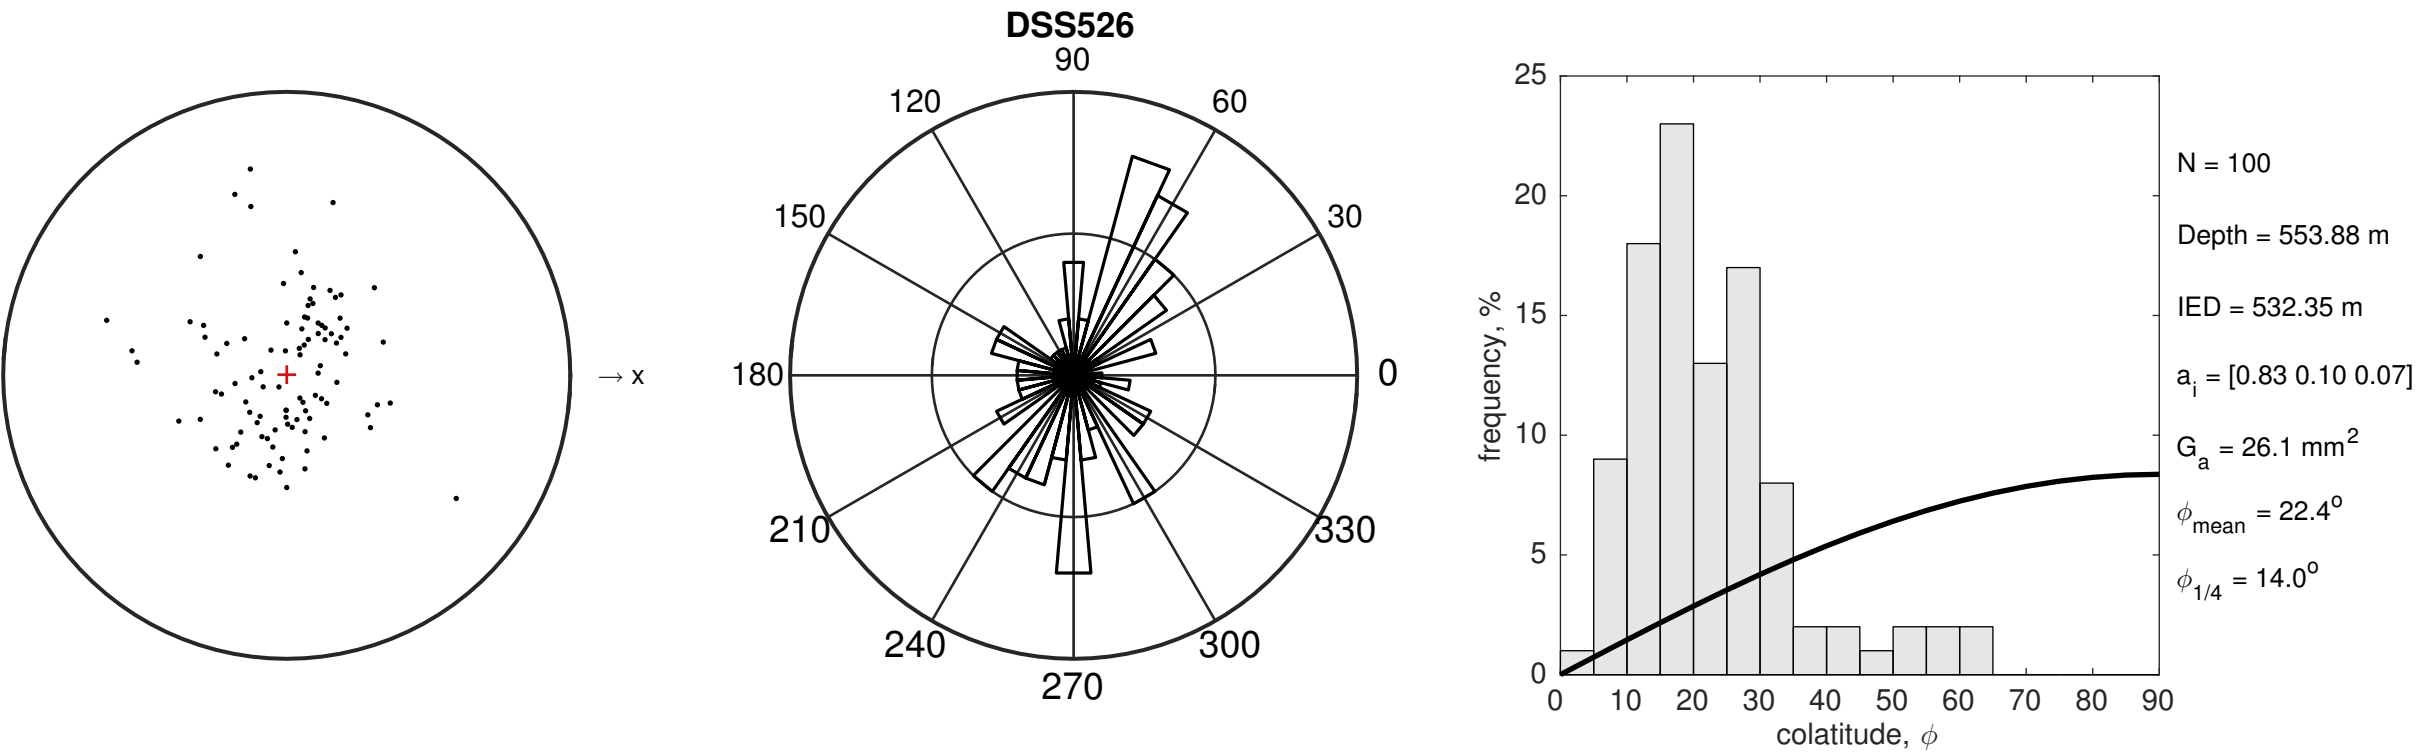

Supplement: Supplementary file 150 [file essd-2015-45-supplement.zip]

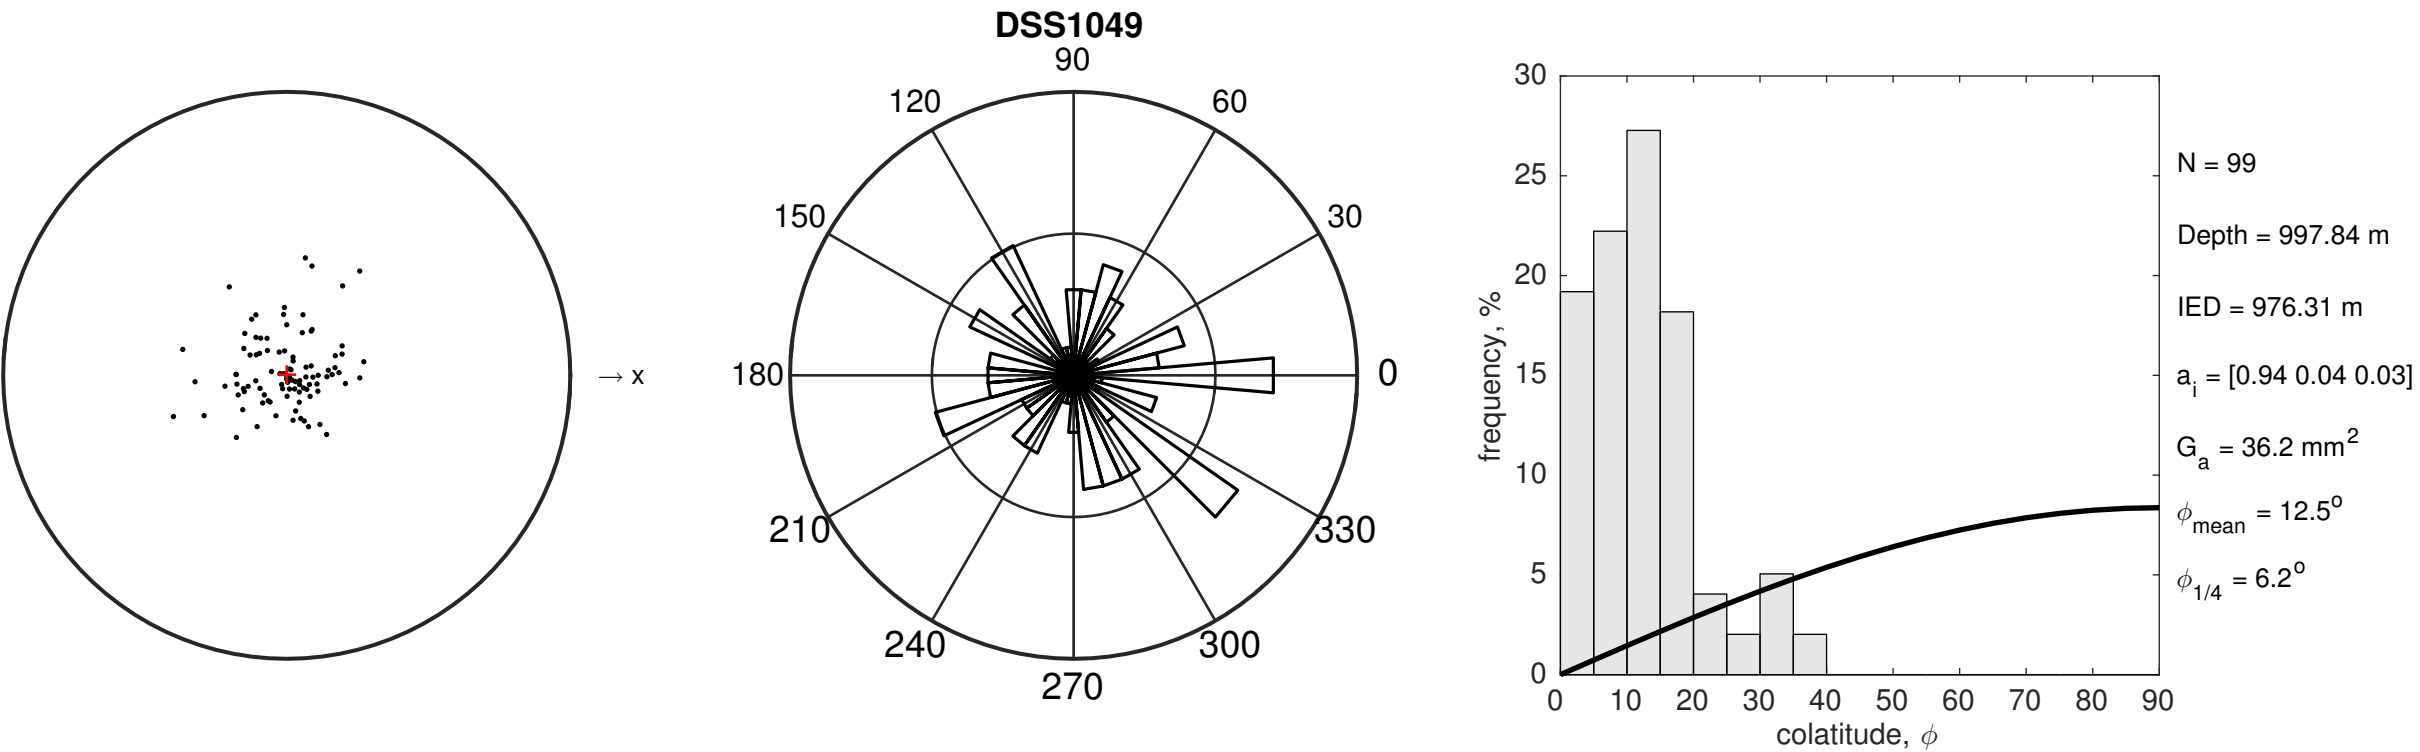

Supplement: Supplementary file 151 [file essd-2015-45-supplement.zip]

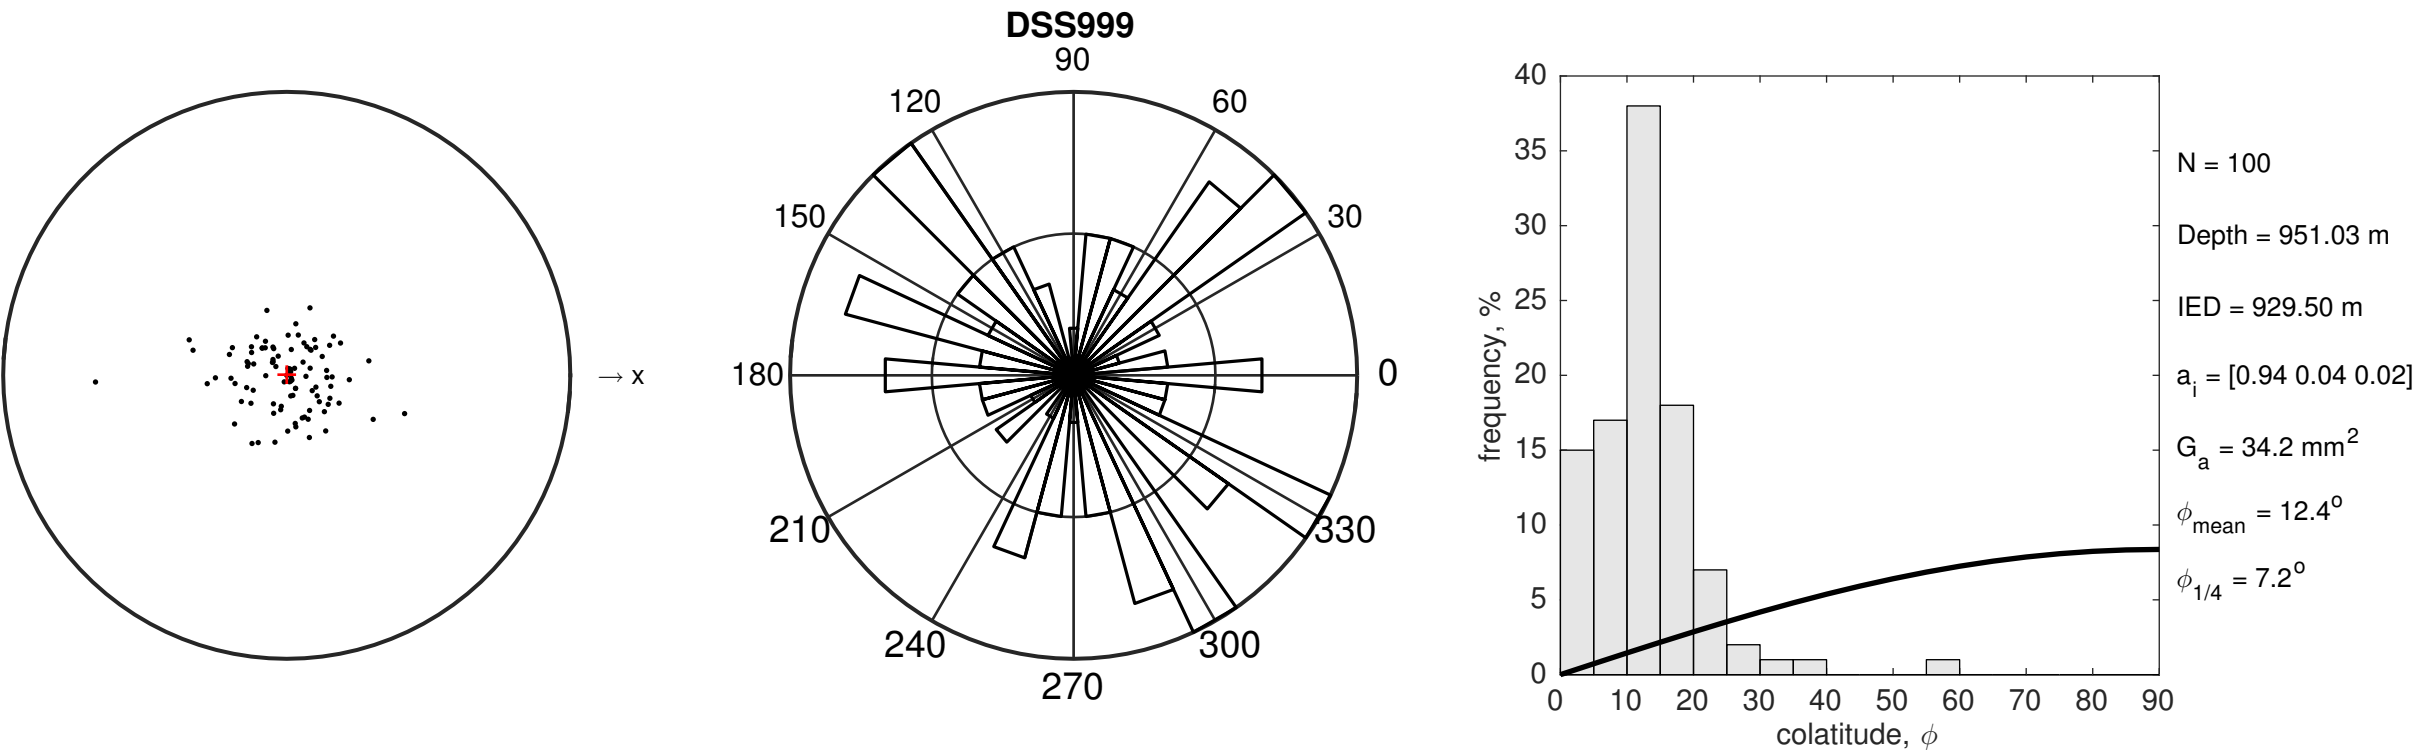

Supplement: Supplementary file 152 [file essd-2015-45-supplement.zip]

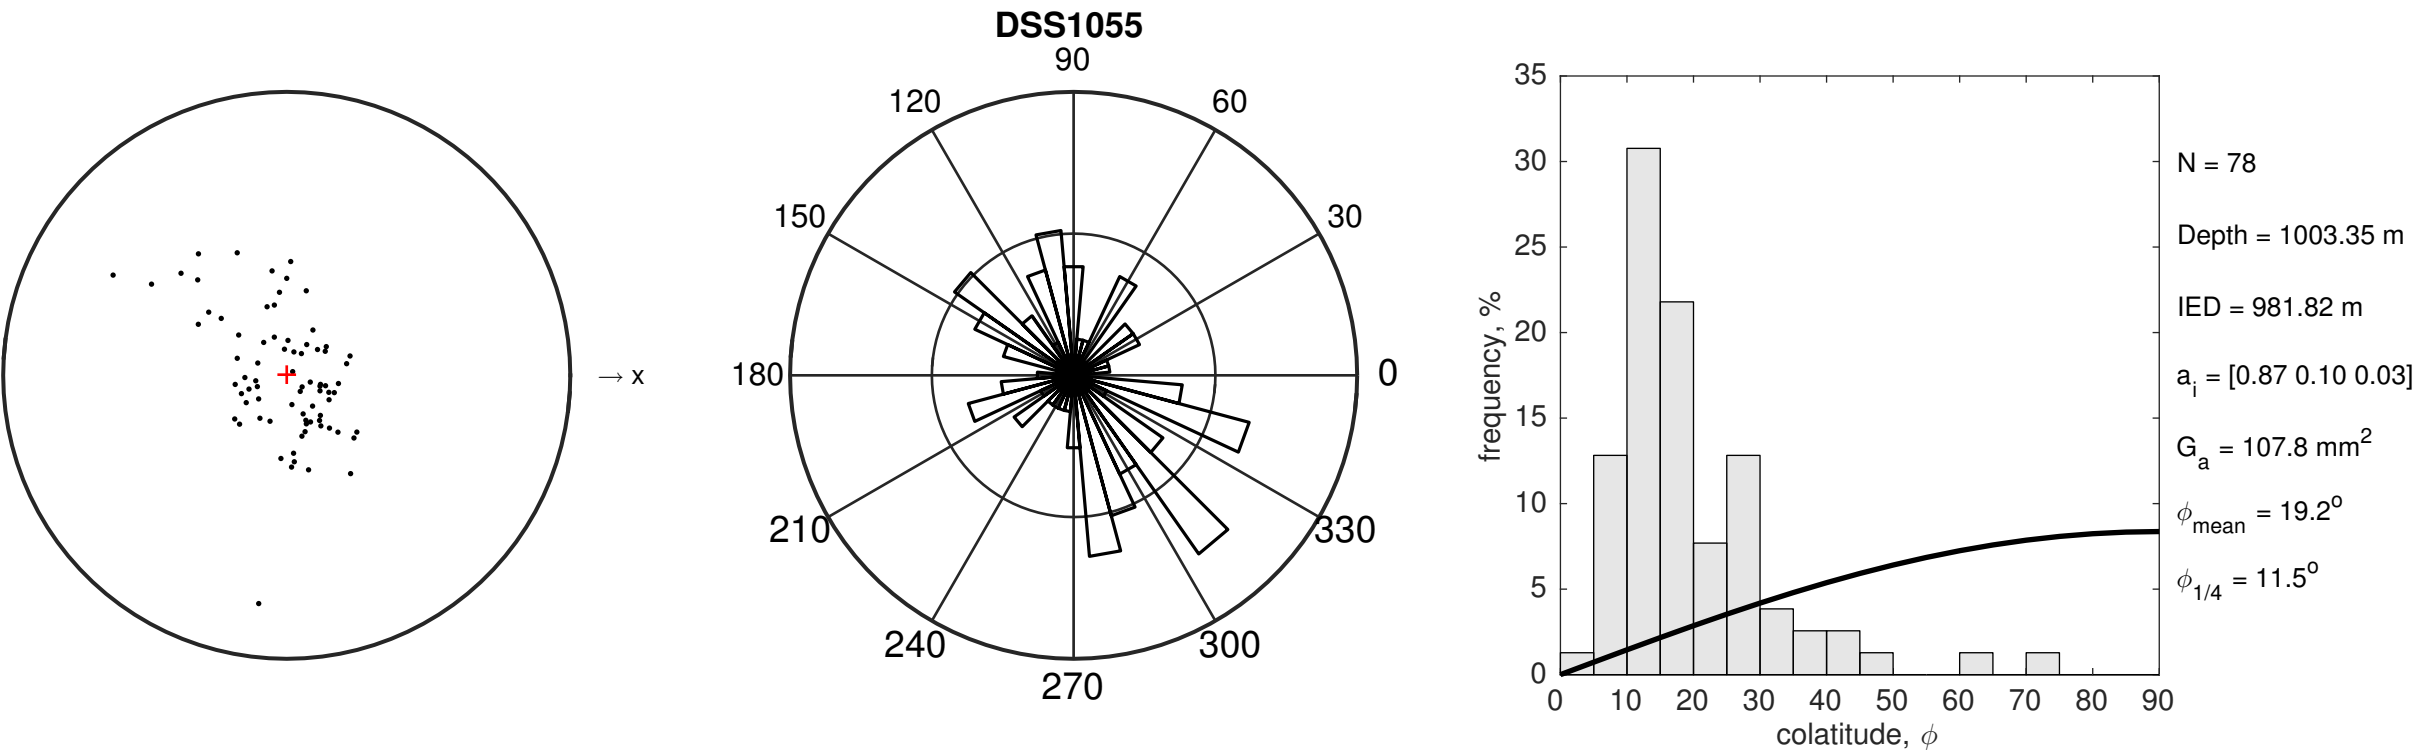

Supplement: Supplementary file 153 [file essd-2015-45-supplement.zip]

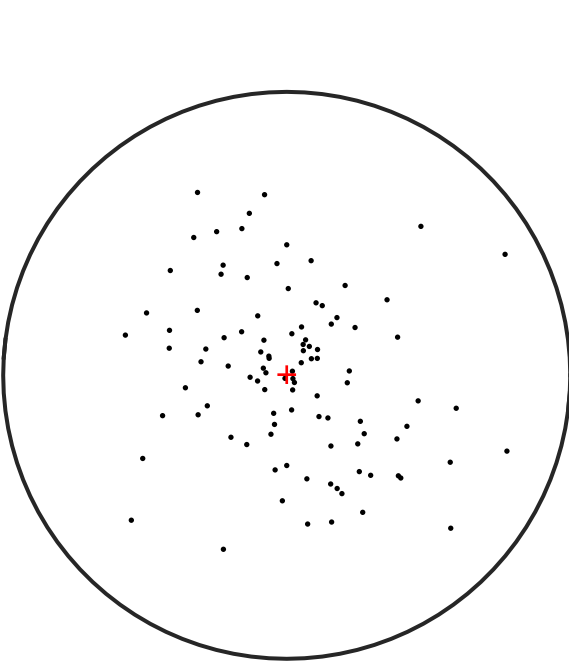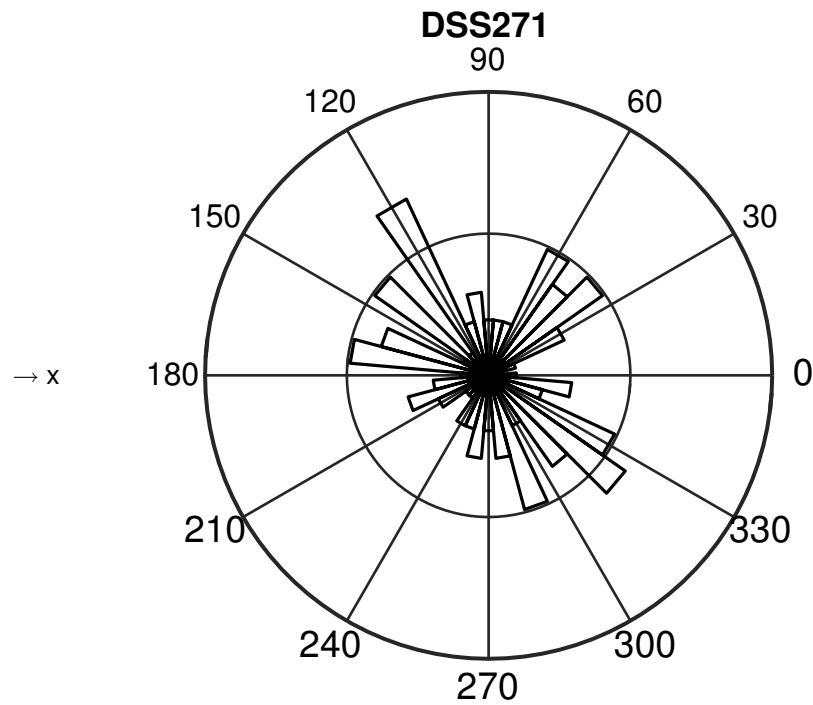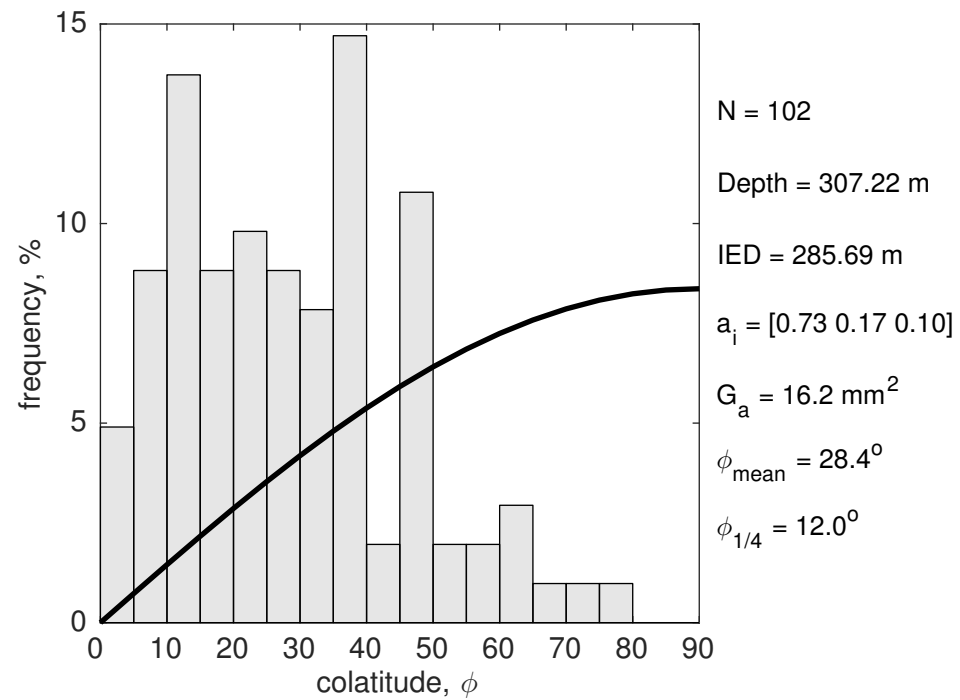

Supplement: Supplementary file 154 [file essd-2015-45-supplement.zip]

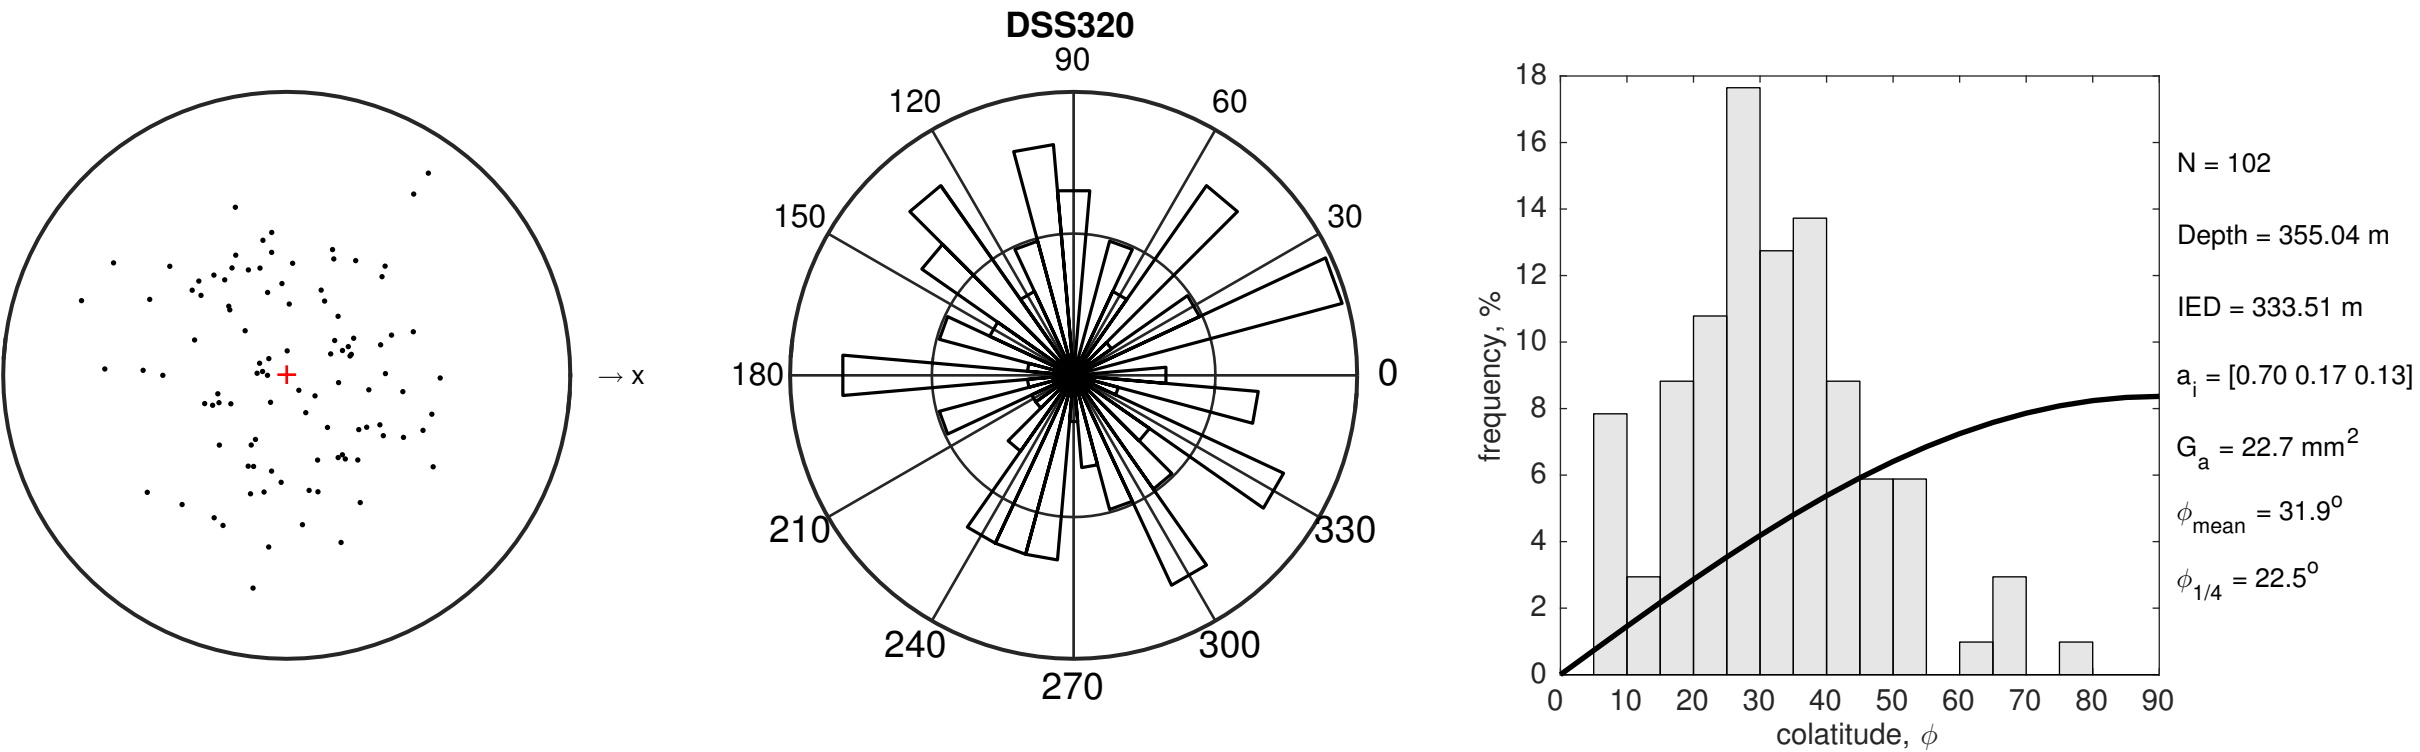

Supplement: Supplementary file 155 [file essd-2015-45-supplement.zip]

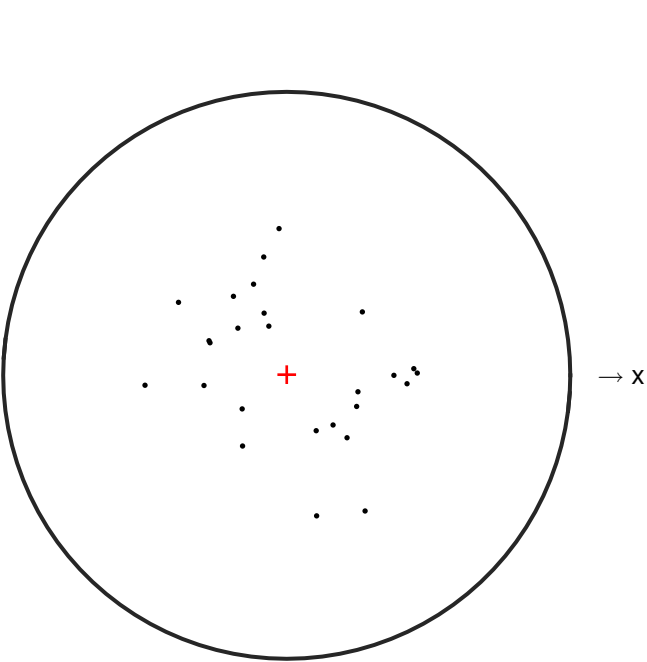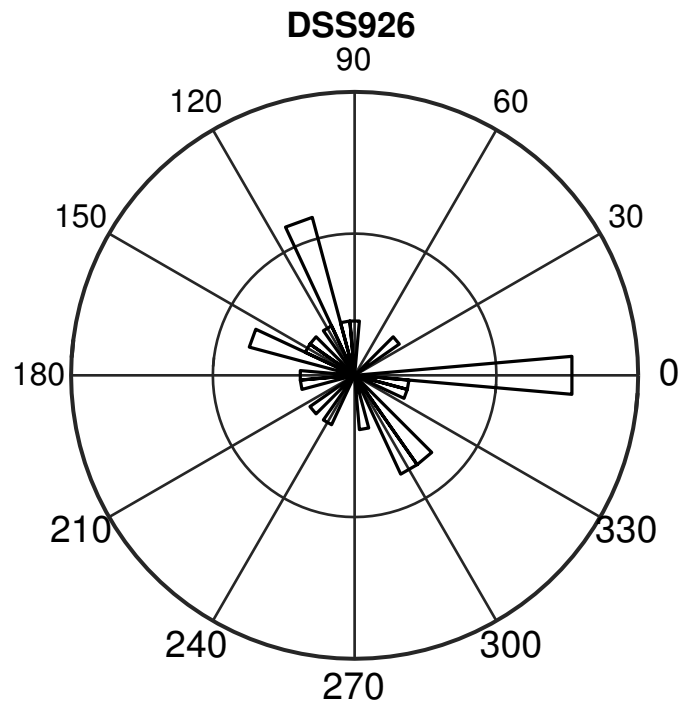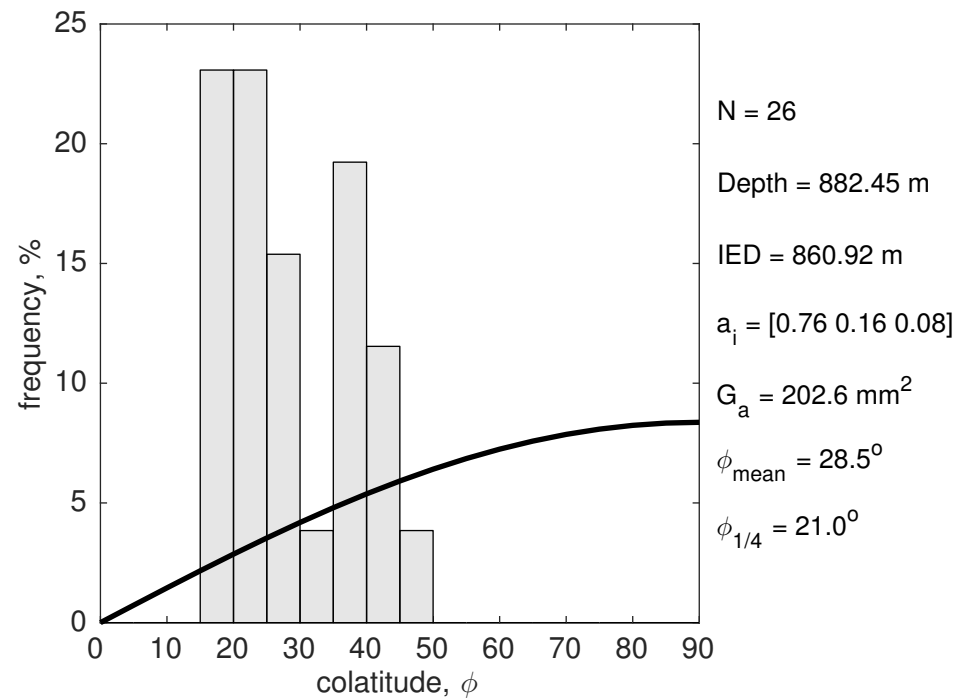

Supplement: Supplementary file 157 [file essd-2015-45-supplement.zip]

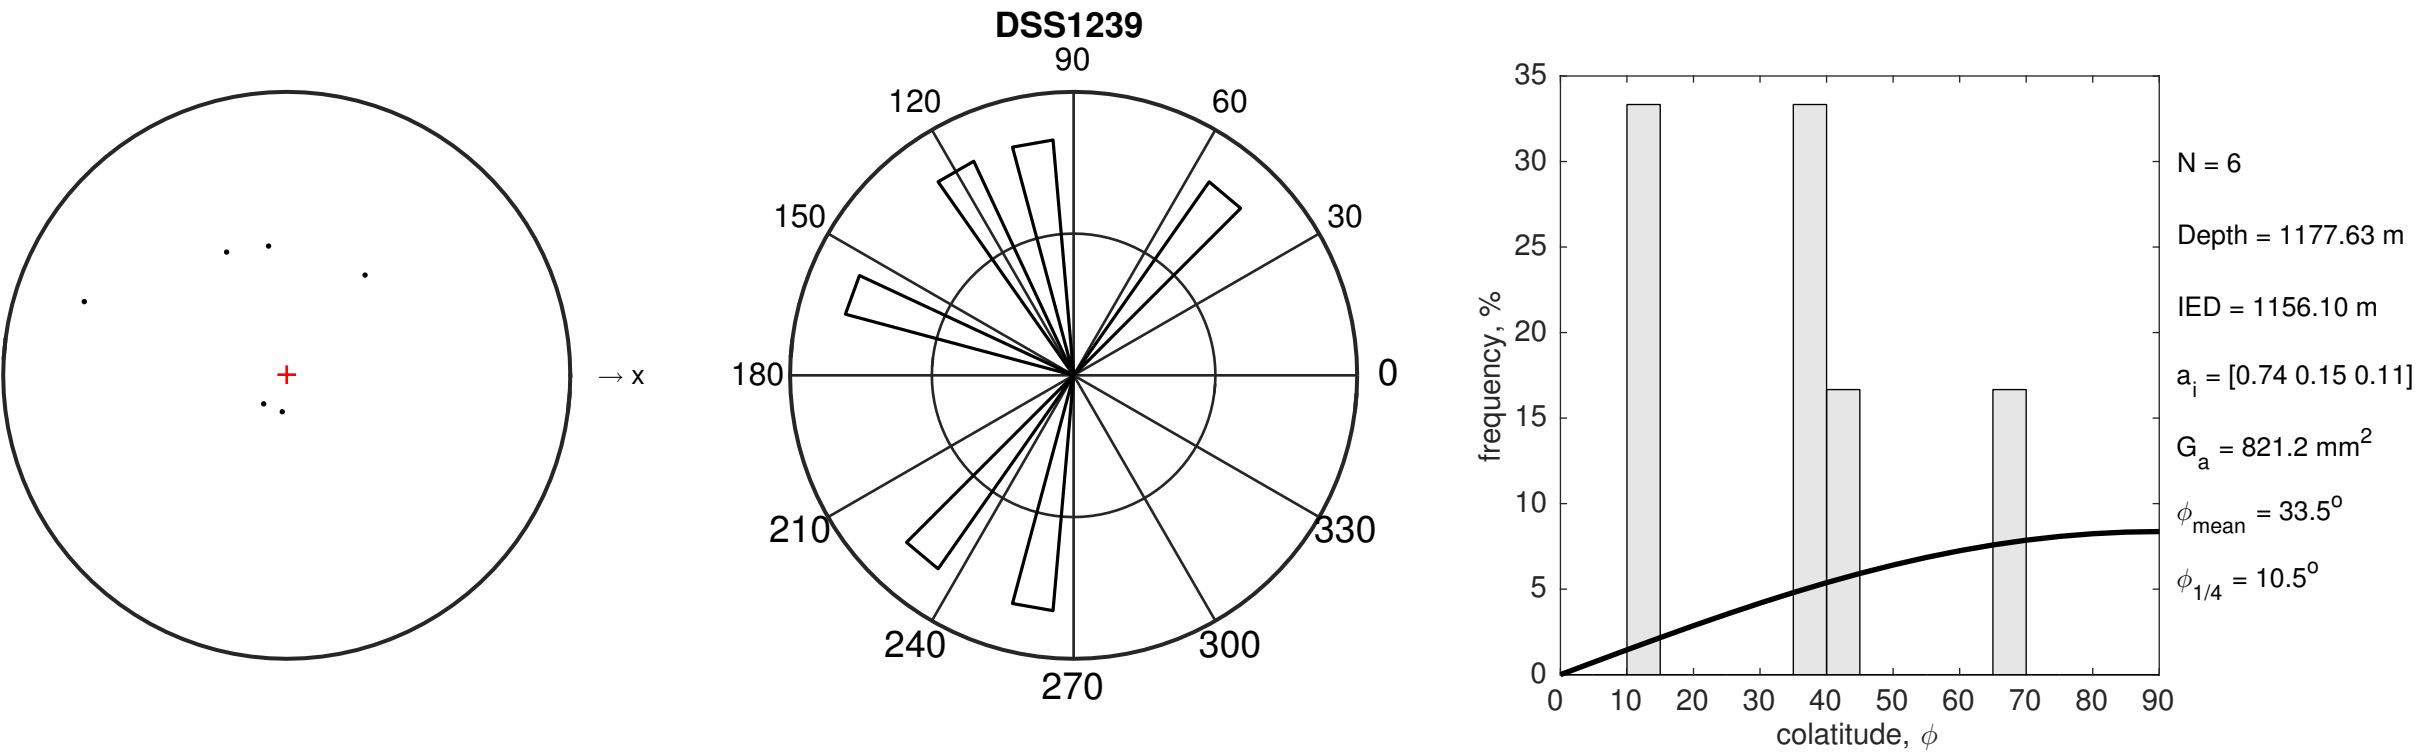

Supplement: Supplementary file 158 [file essd-2015-45-supplement.zip]

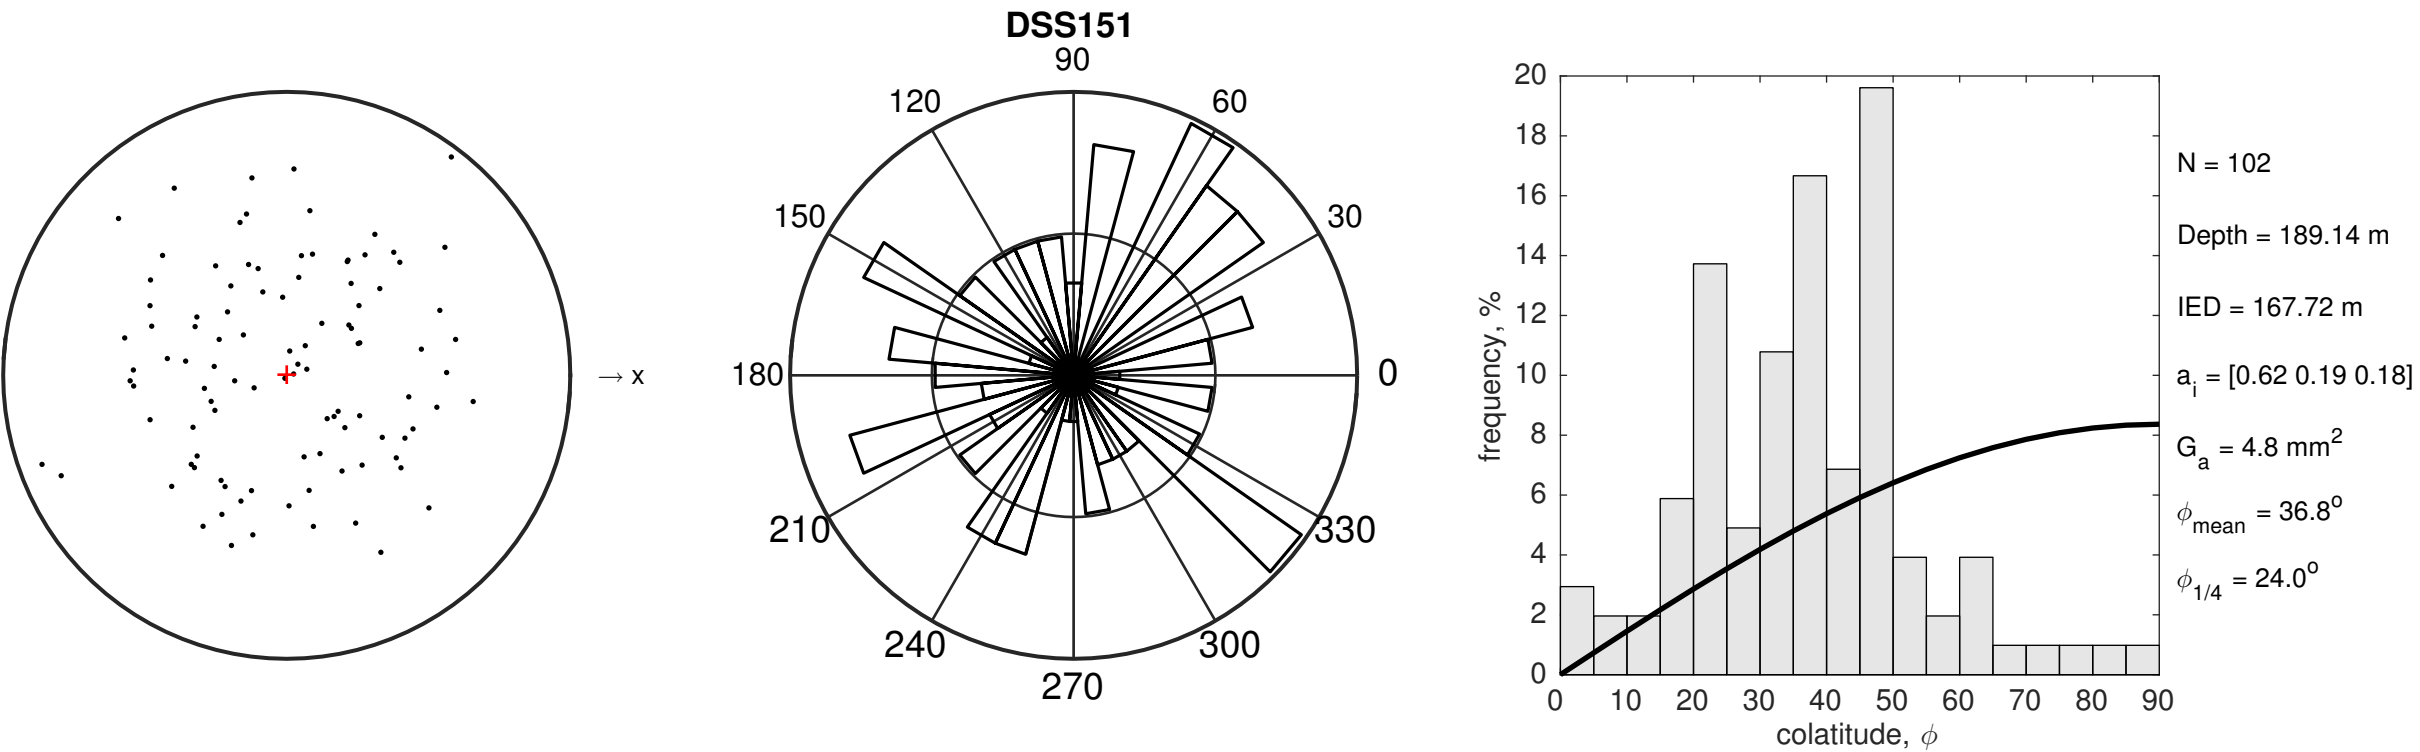

Supplement: Supplementary file 159 [file essd-2015-45-supplement.zip]

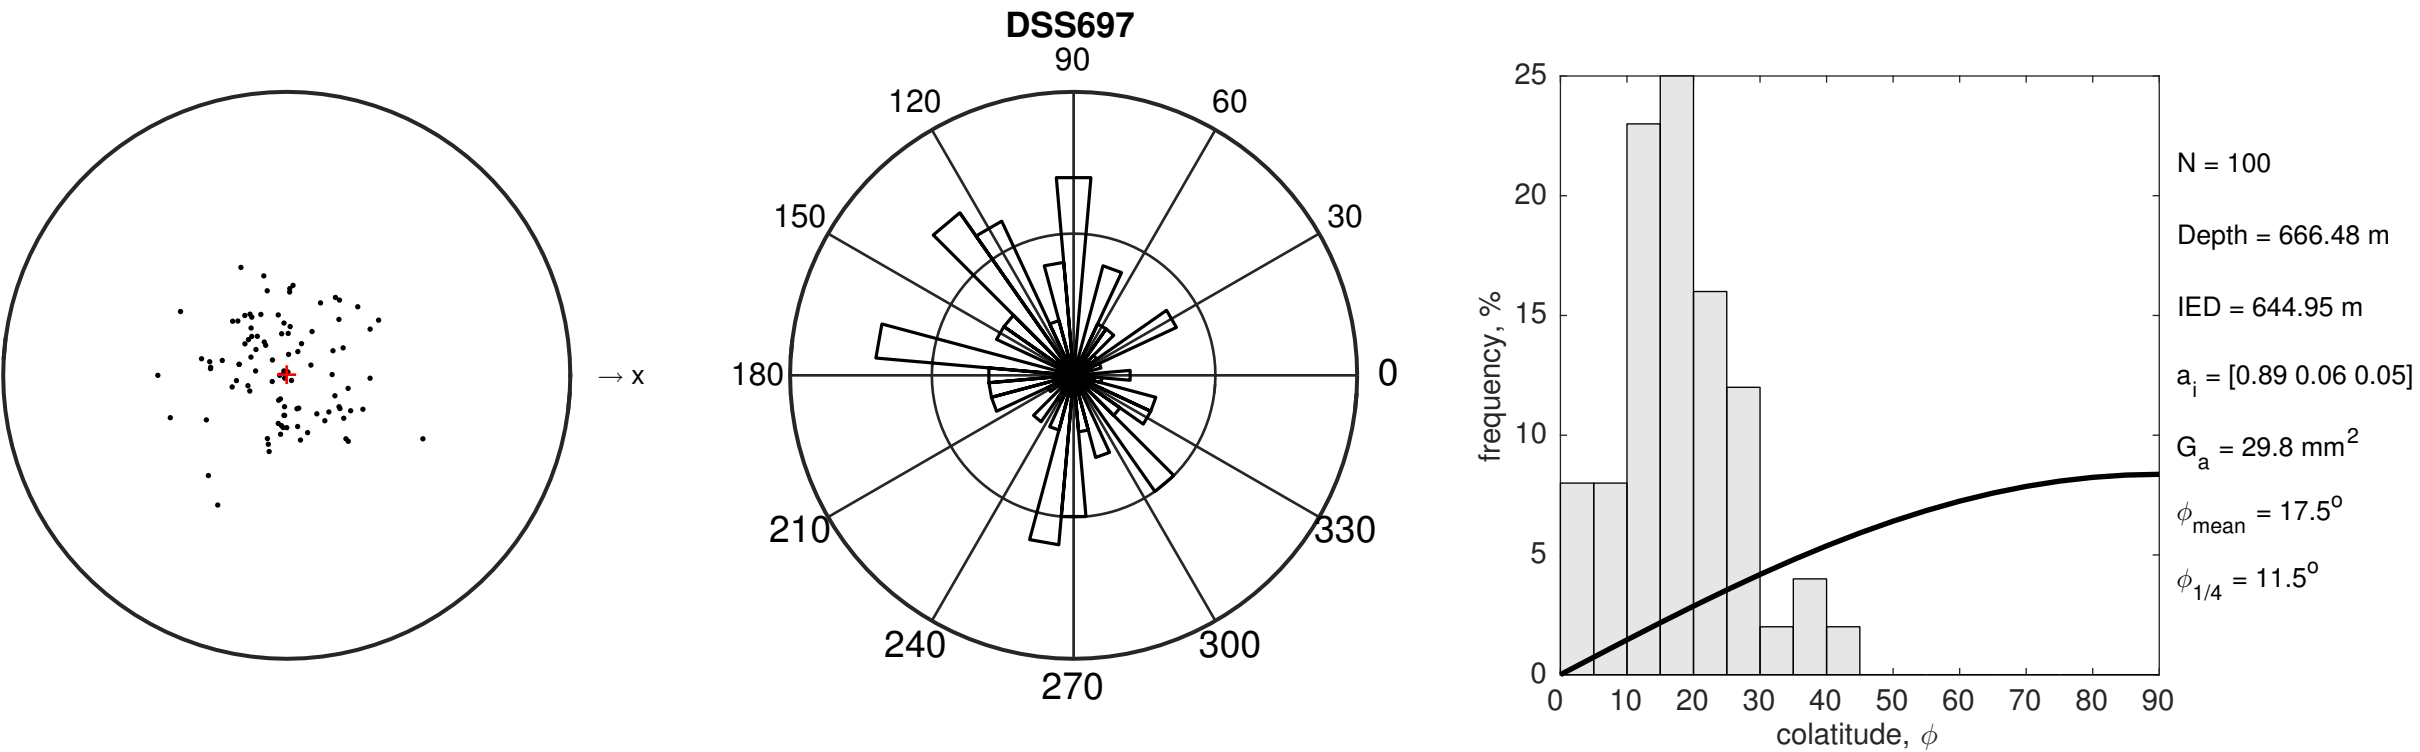

Supplement: Supplementary file 160 [file essd-2015-45-supplement.zip]

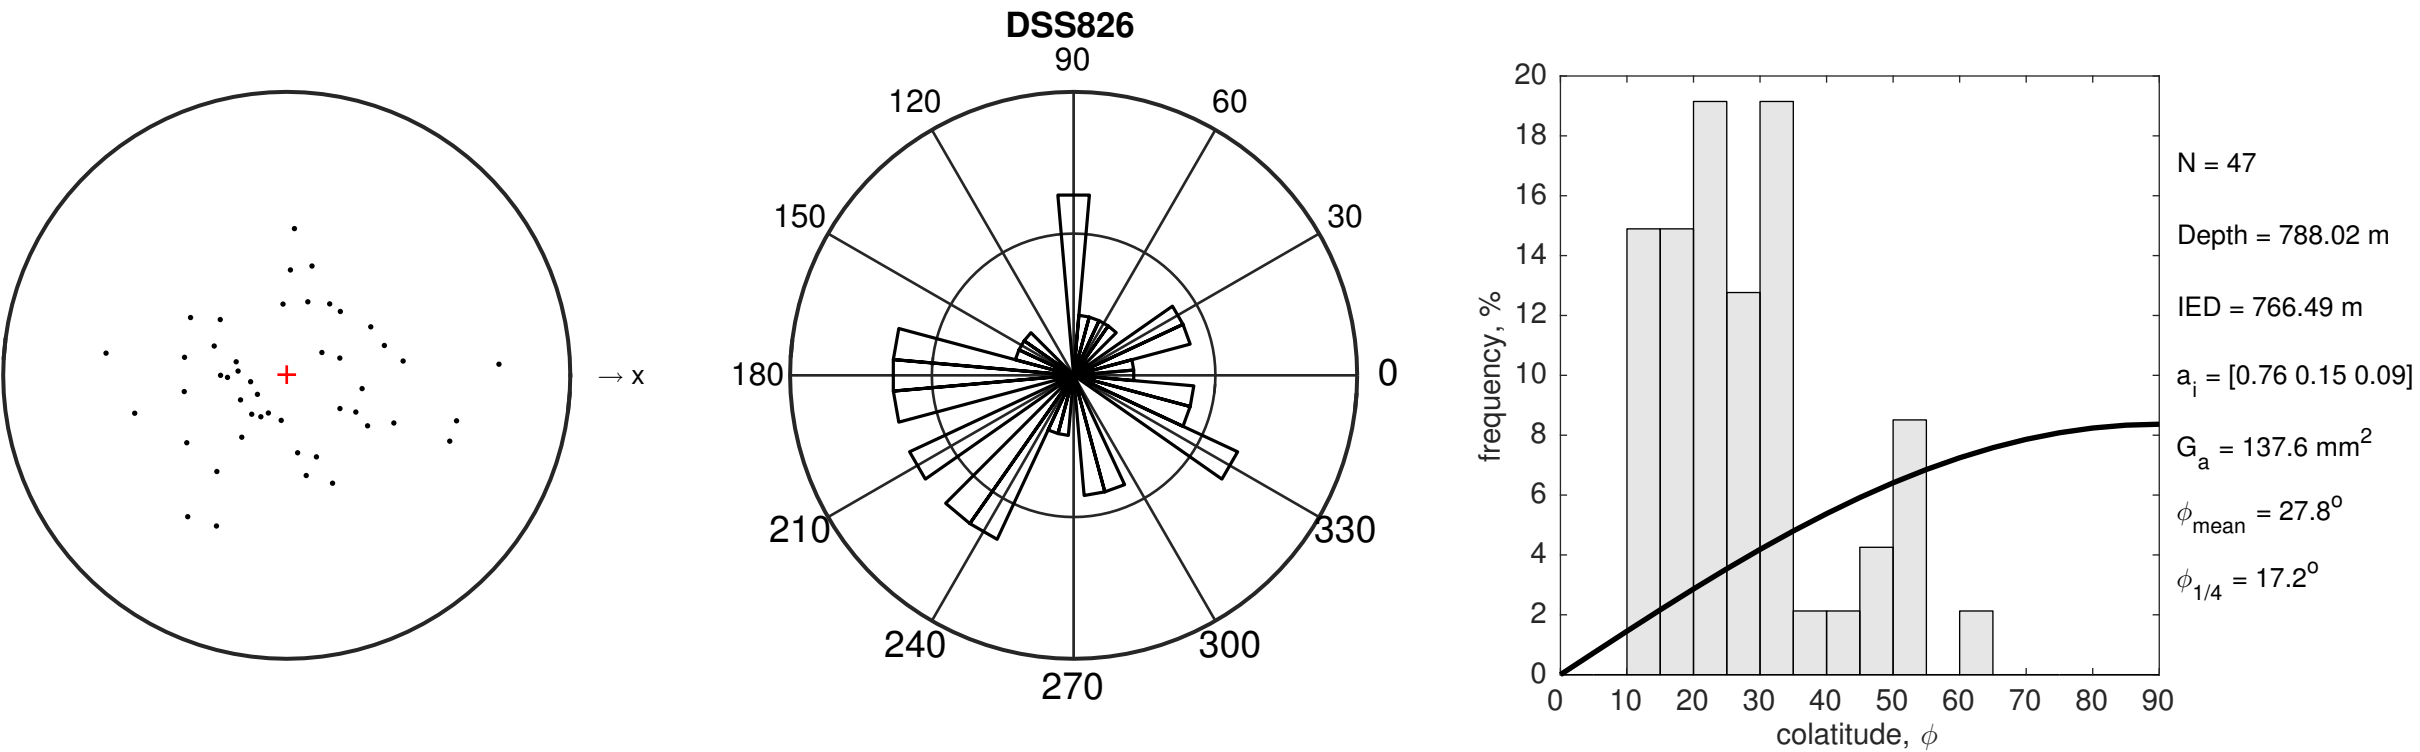

Supplement: Supplementary file 161 [file essd-2015-45-supplement.zip]

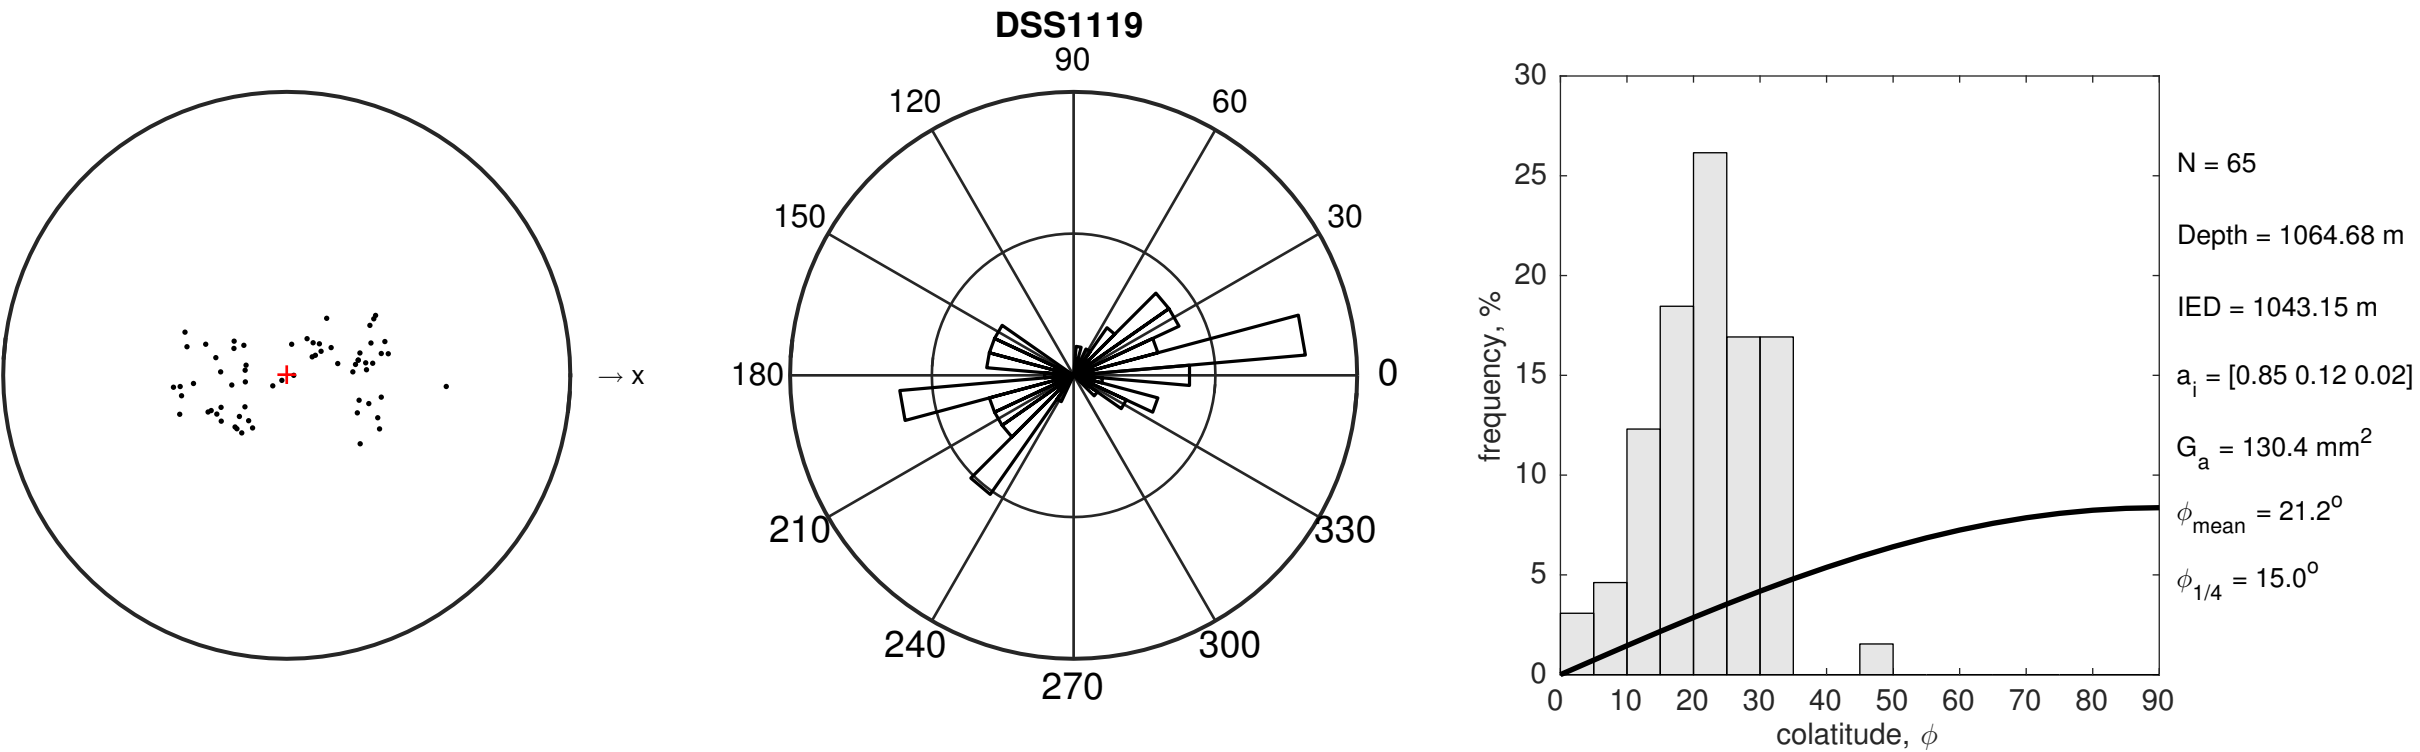

Supplement: Supplementary file 162 [file essd-2015-45-supplement.zip]

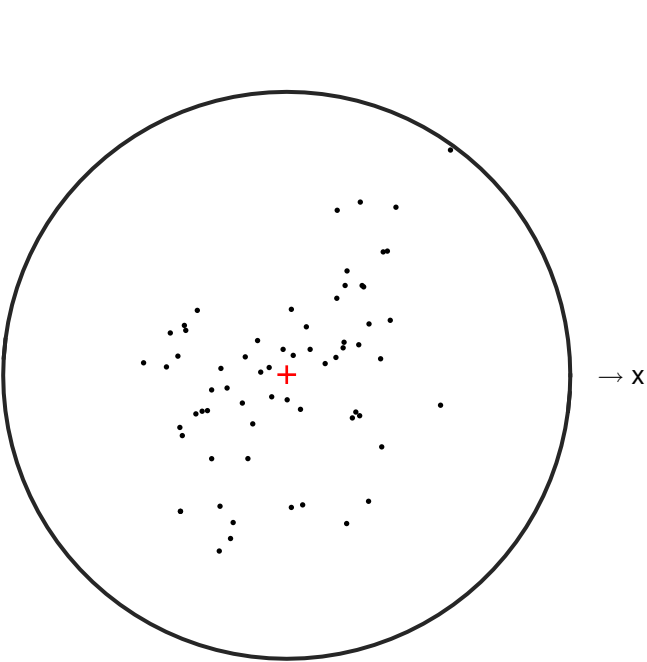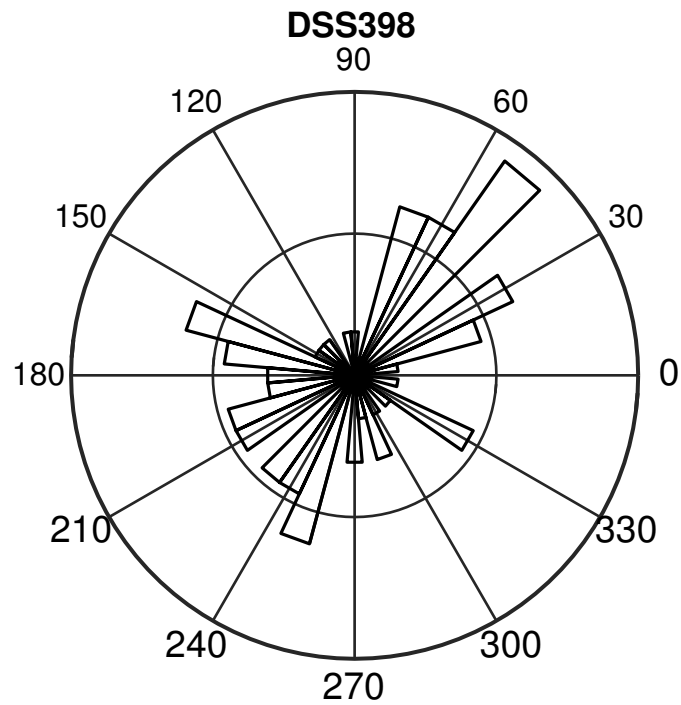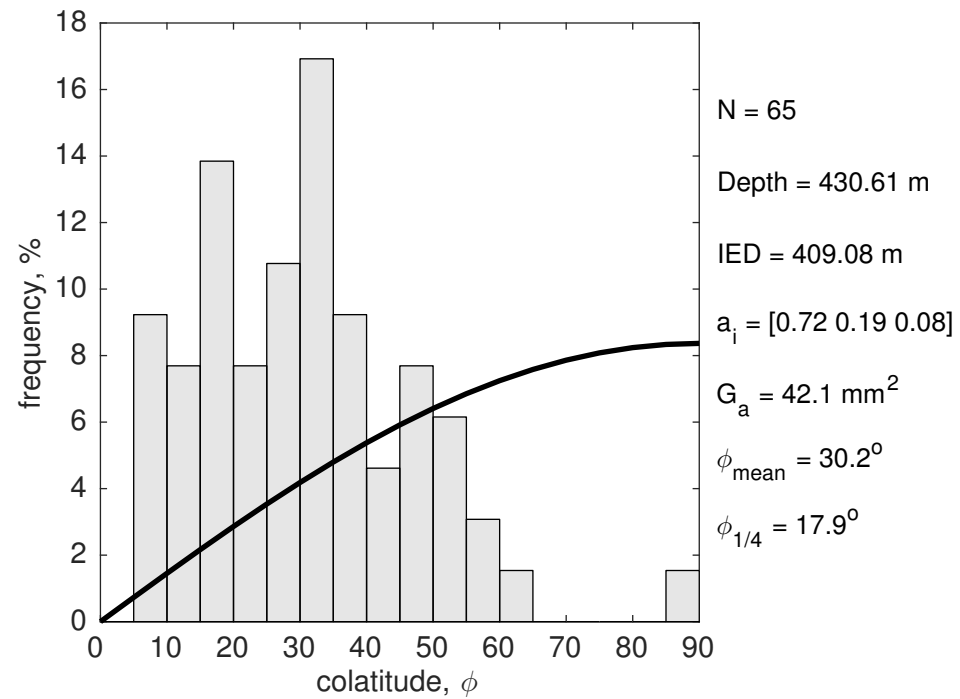

Supplement: Supplementary file 163 [file essd-2015-45-supplement.zip]

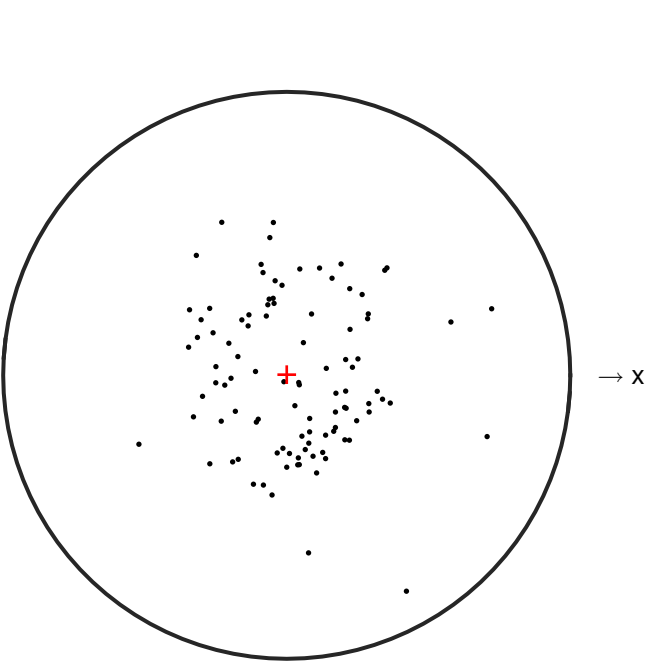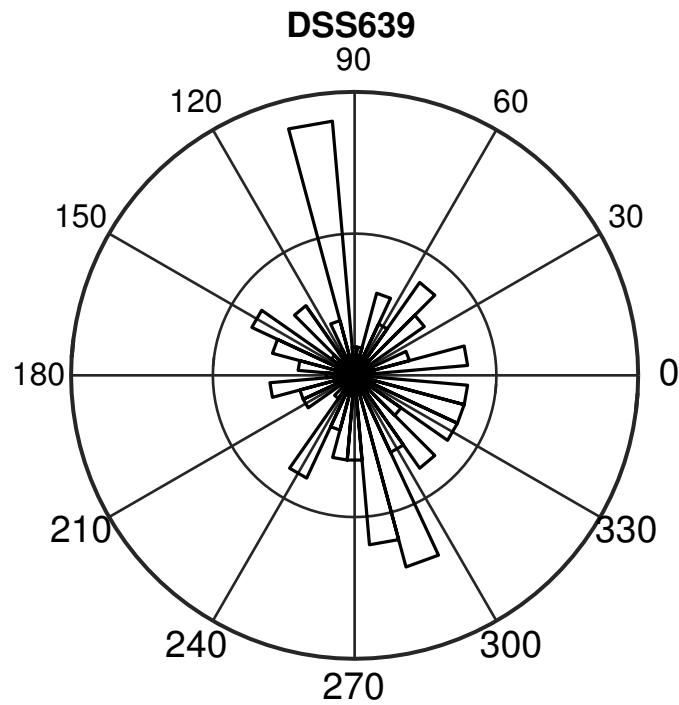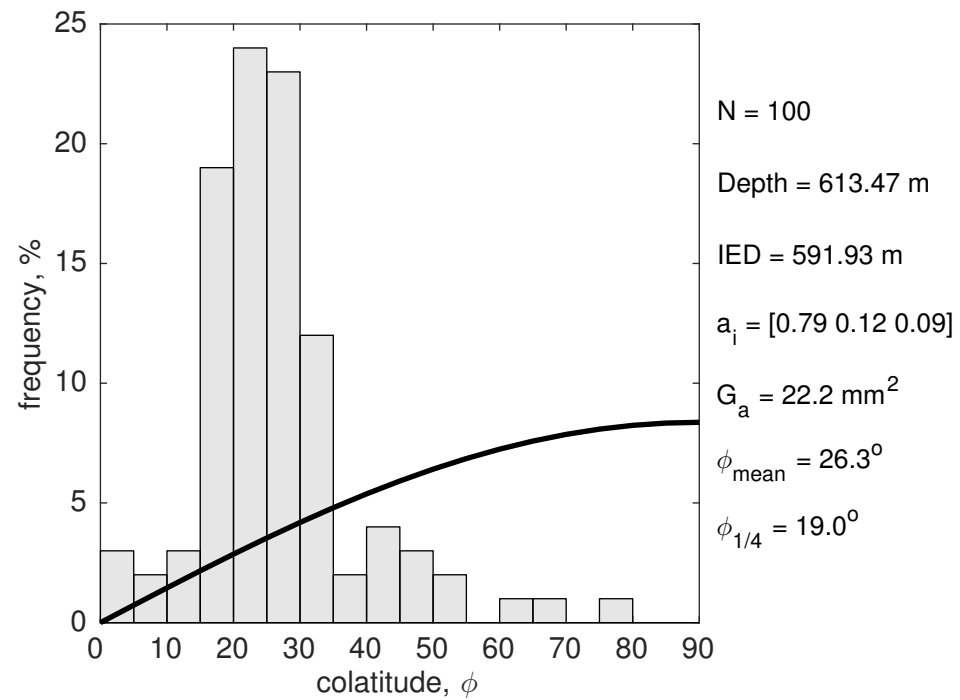

Supplement: Supplementary file 164 [file essd-2015-45-supplement.zip]

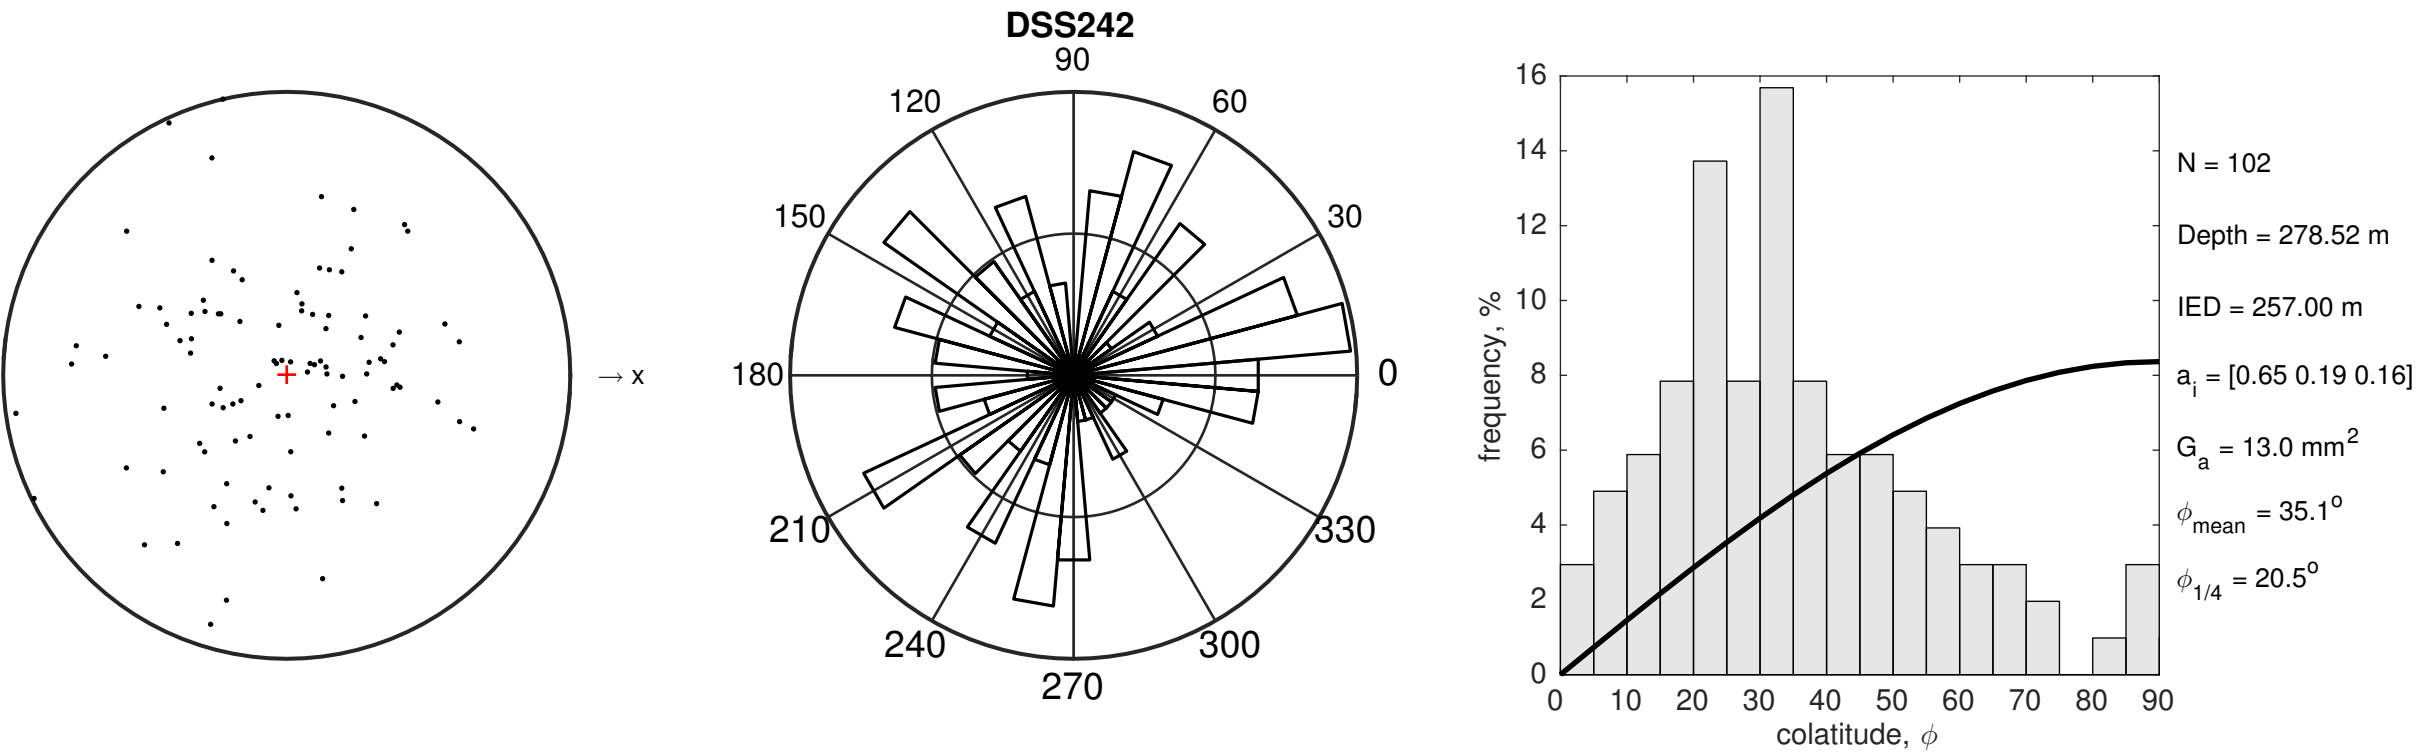

Supplement: Supplementary file 165 [file essd-2015-45-supplement.zip]

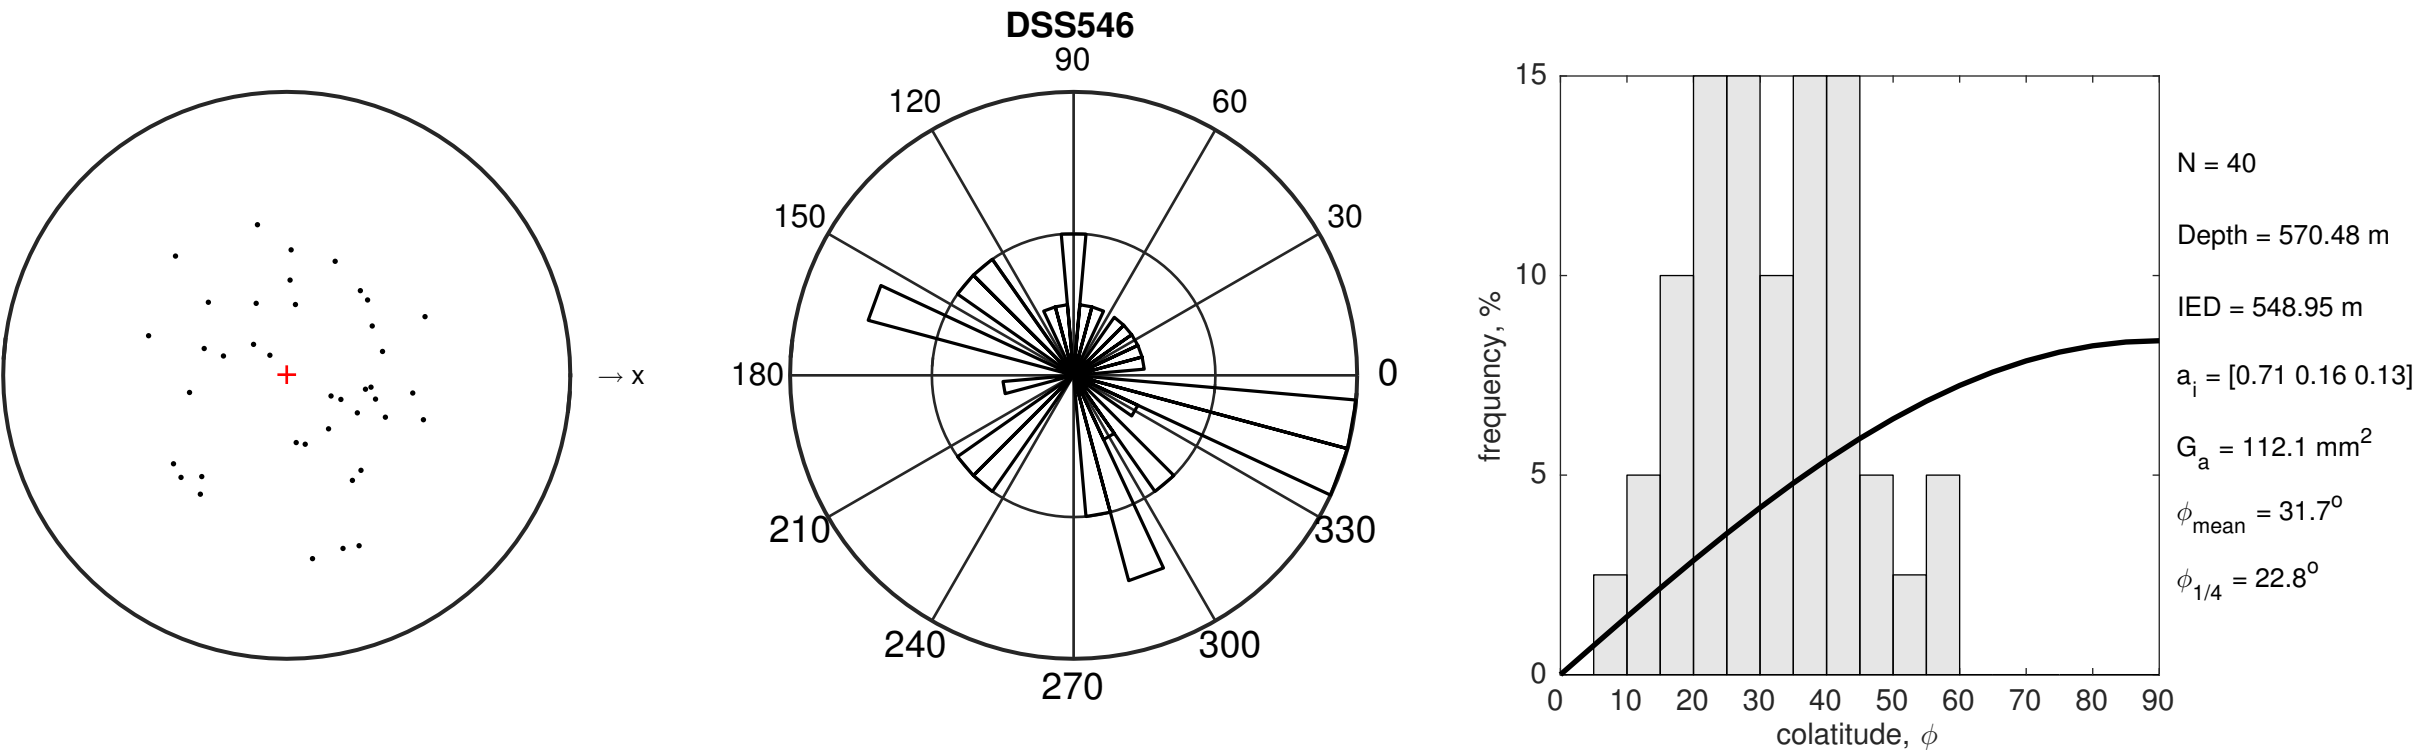

Supplement: Supplementary file 166 [file essd-2015-45-supplement.zip]

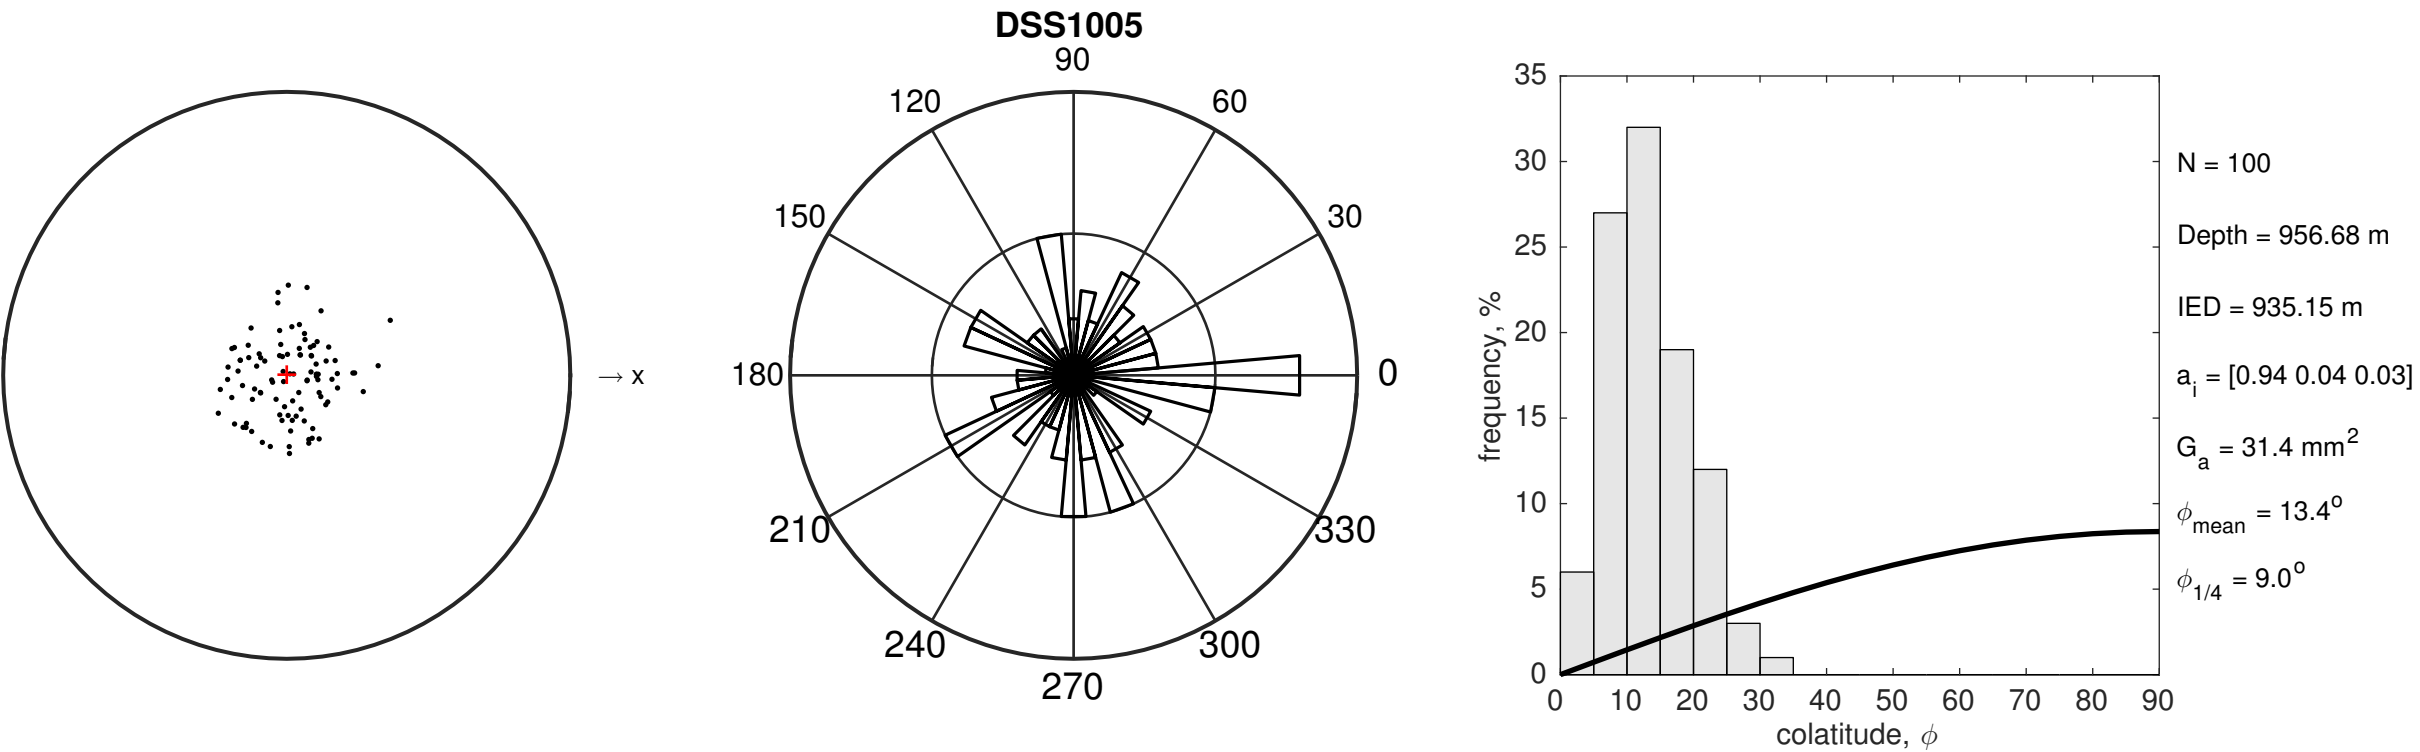

Supplement: Supplementary file 167 [file essd-2015-45-supplement.zip]

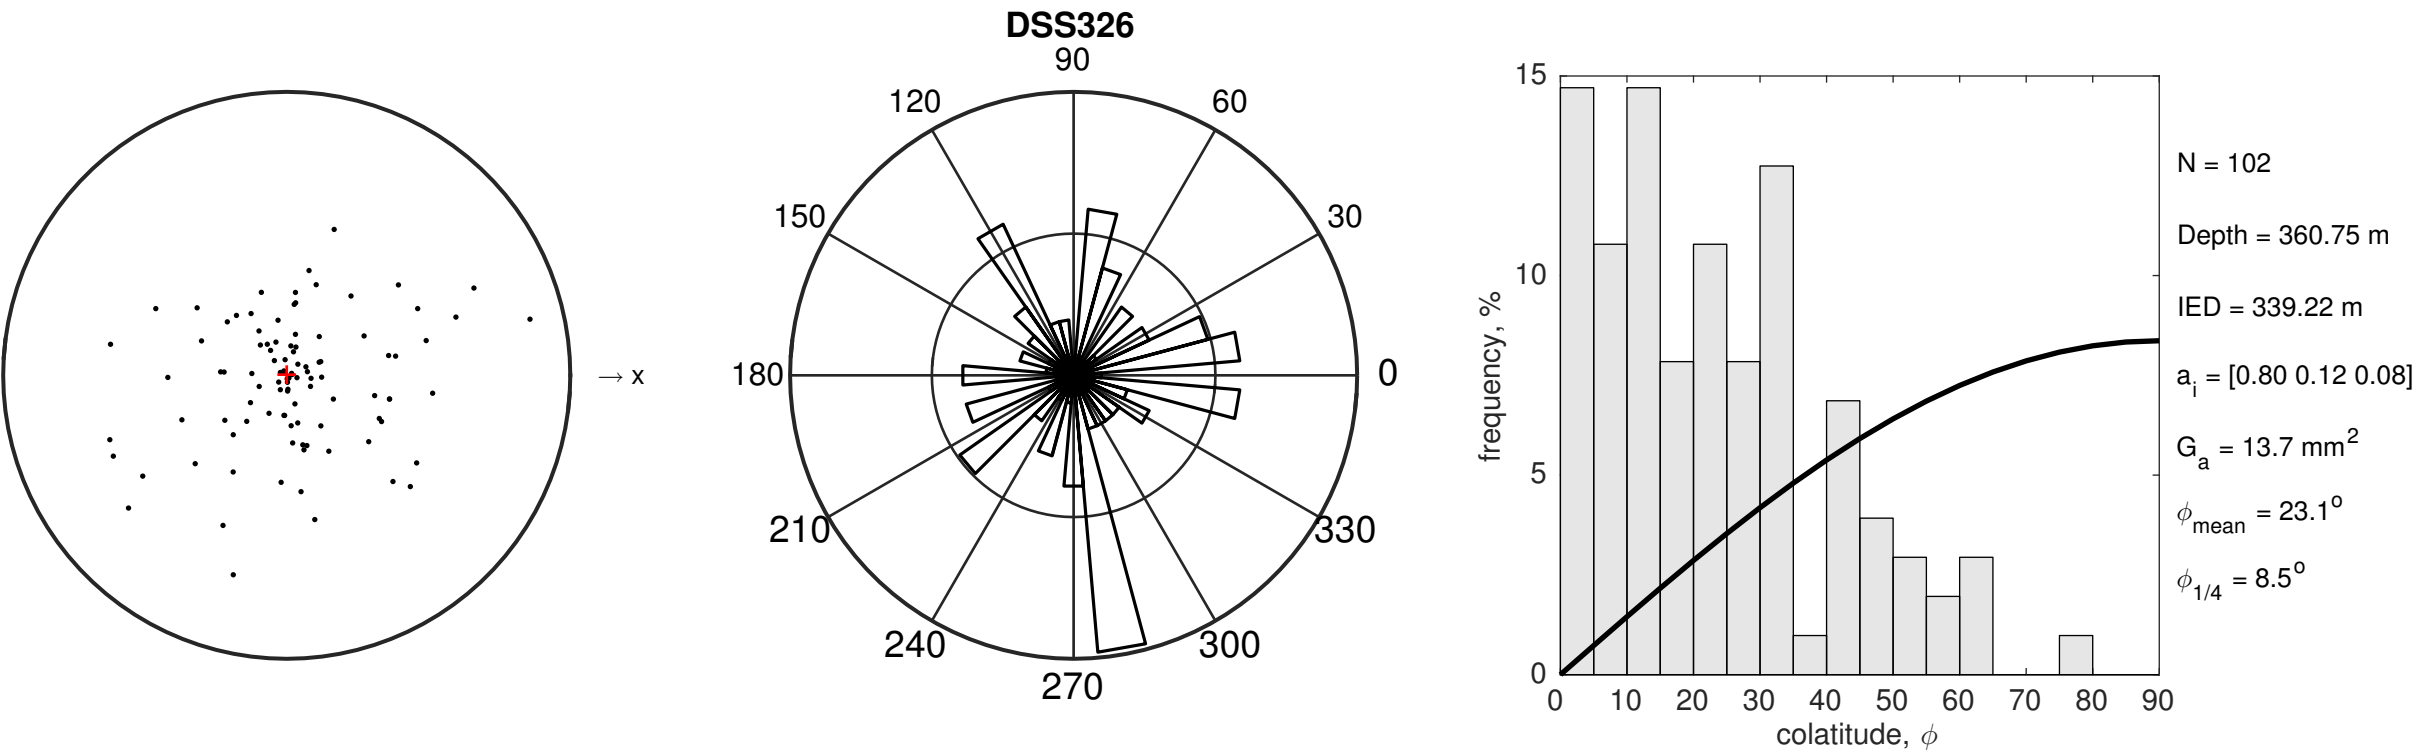

Supplement: Supplementary file 168 [file essd-2015-45-supplement.zip]

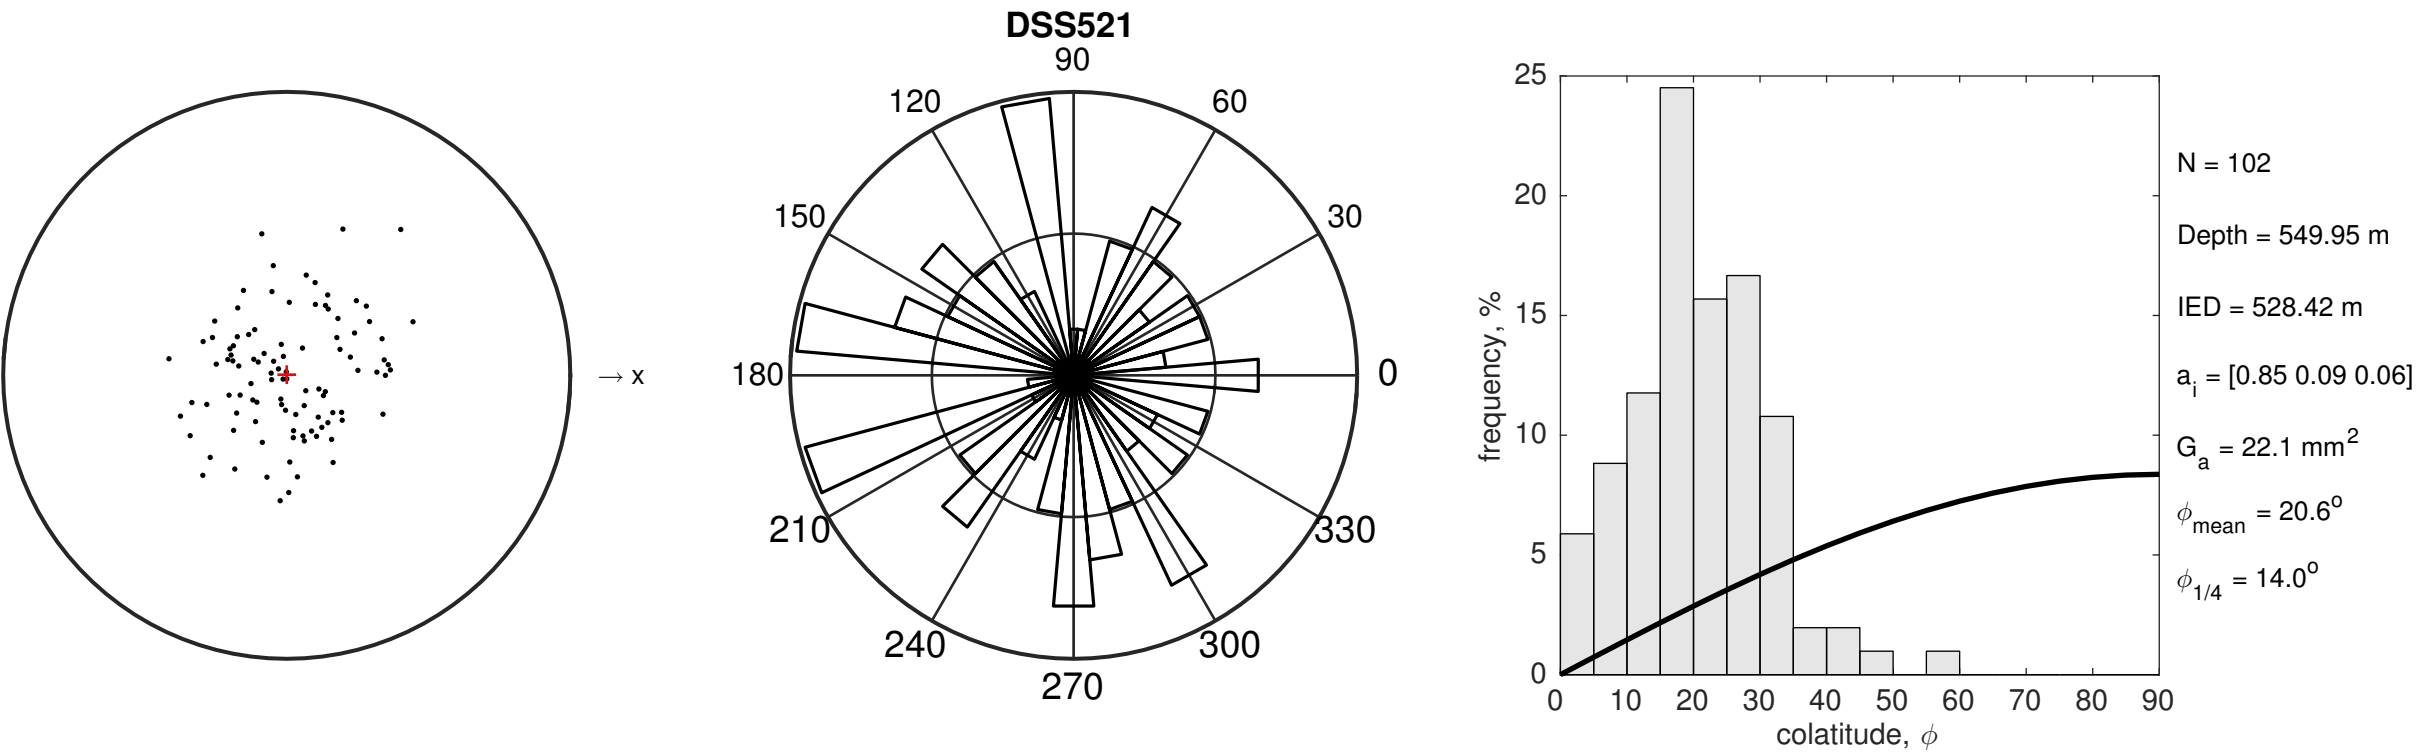

Supplement: Supplementary file 169 [file essd-2015-45-supplement.zip]

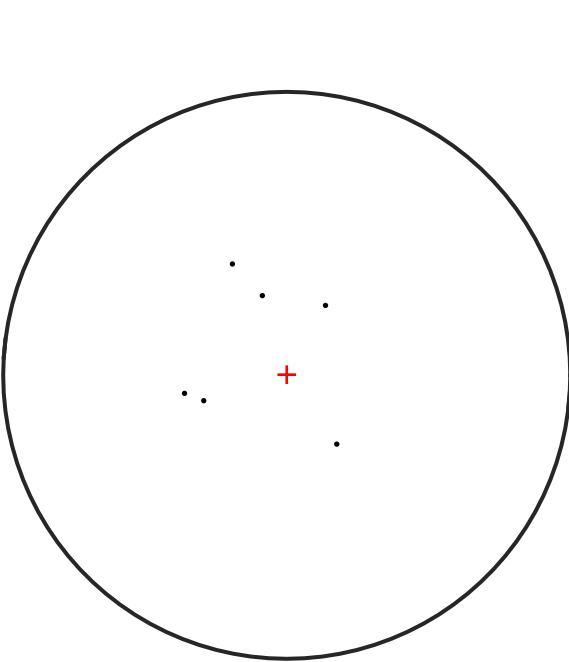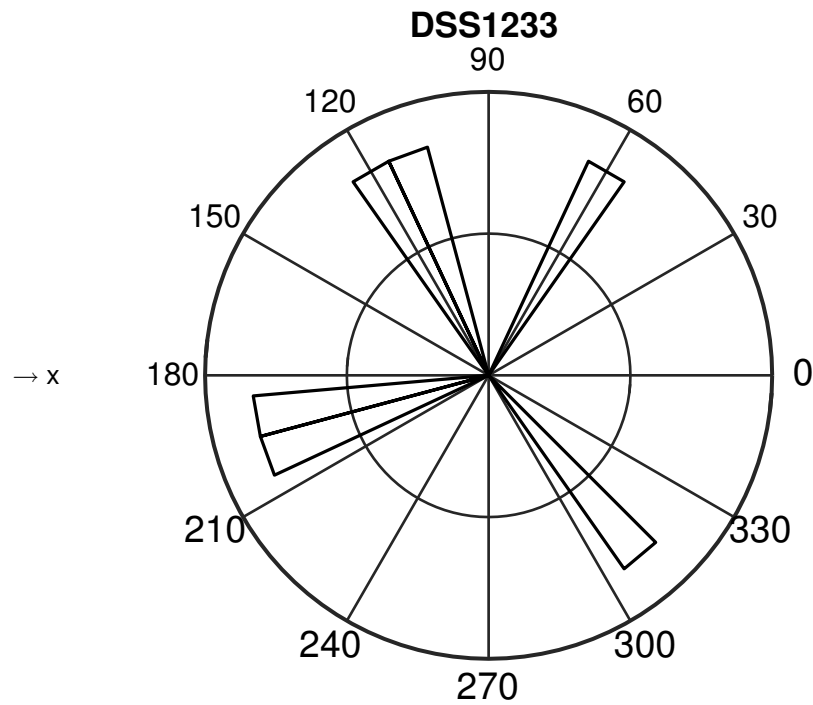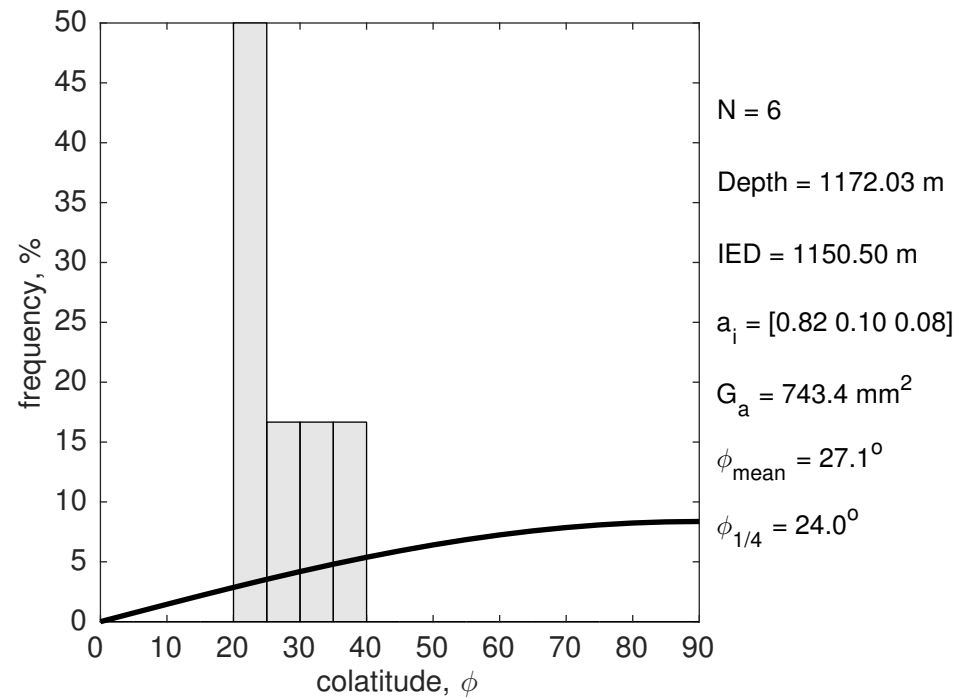

Supplement: Supplementary file 170 [file essd-2015-45-supplement.zip]

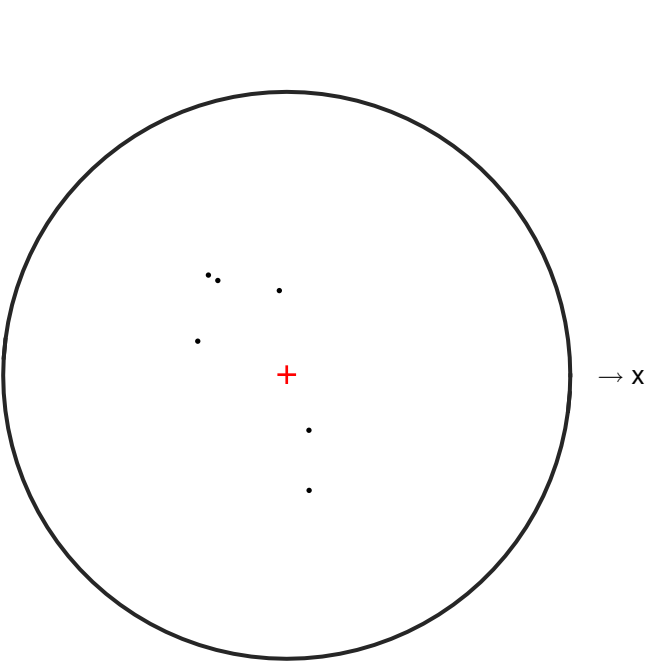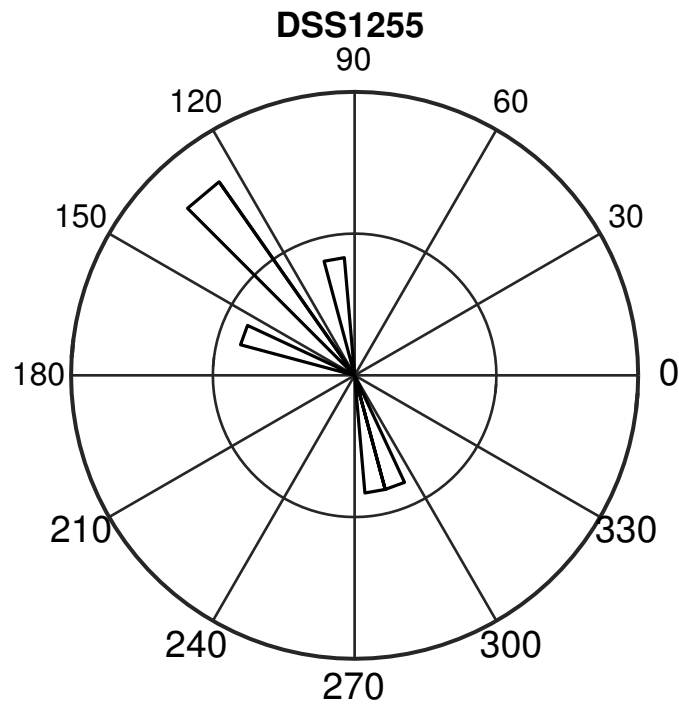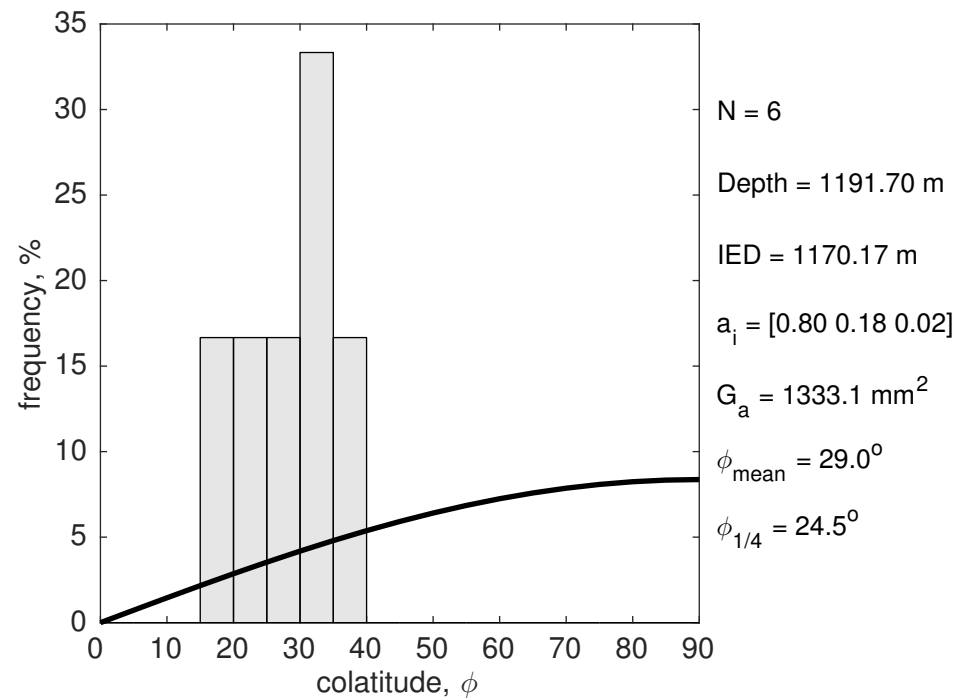

Supplement: Supplementary file 171 [file essd-2015-45-supplement.zip]

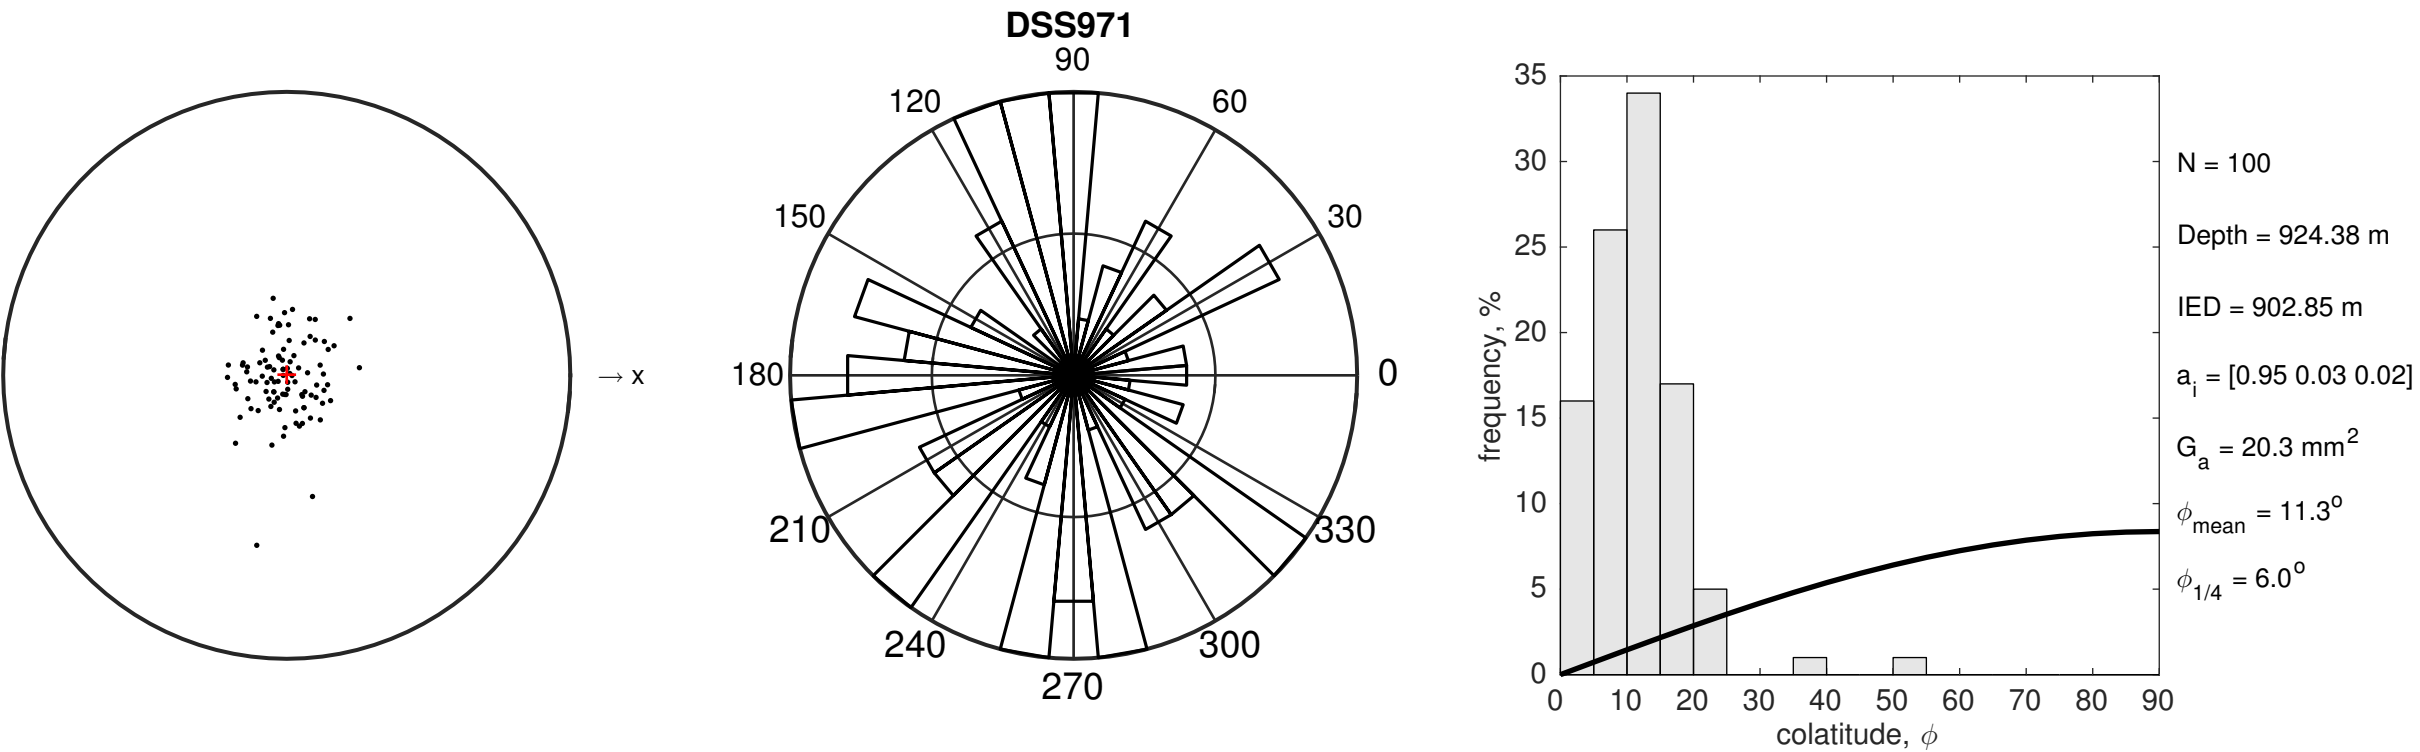

Supplement: Supplementary file 172 [file essd-2015-45-supplement.zip]

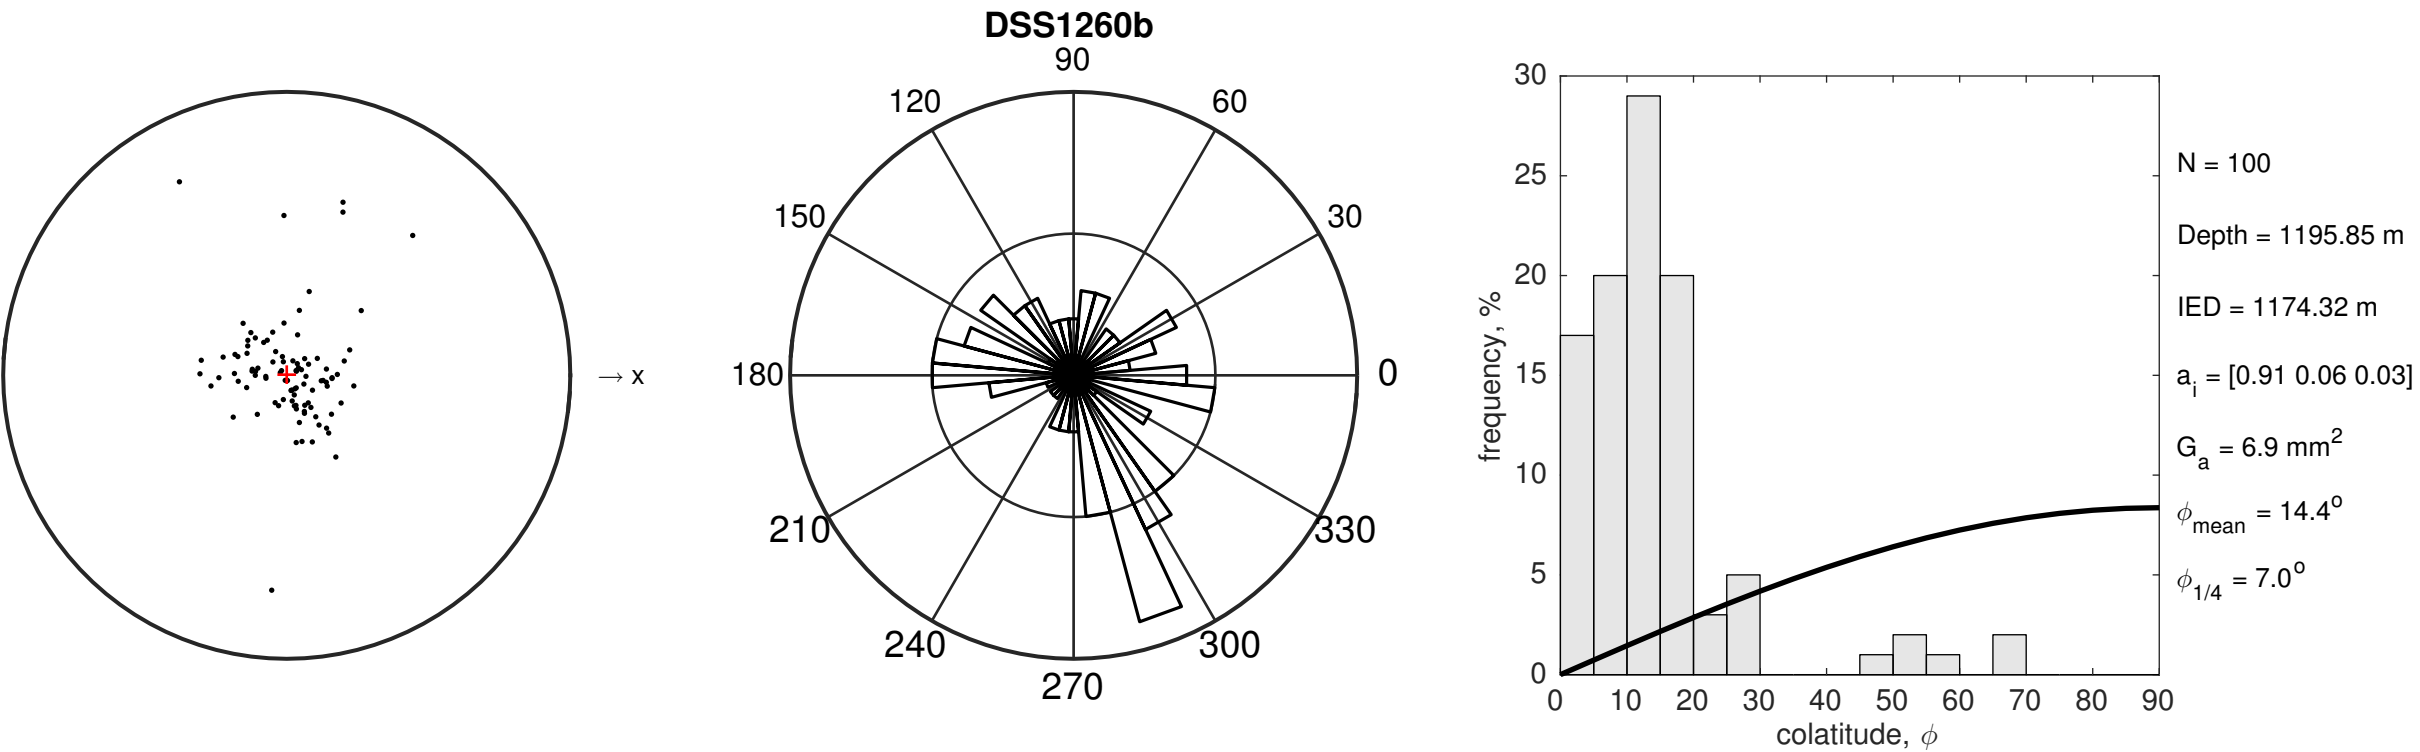

Supplement: Supplementary file 173 [file essd-2015-45-supplement.zip]

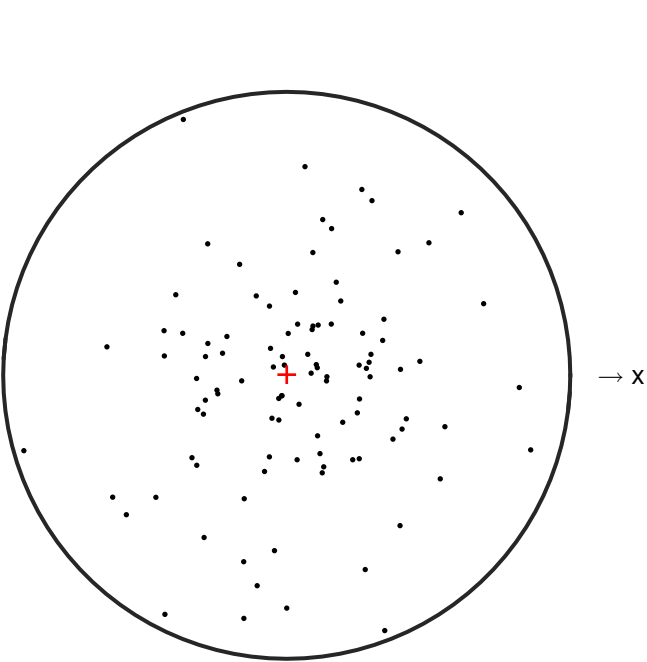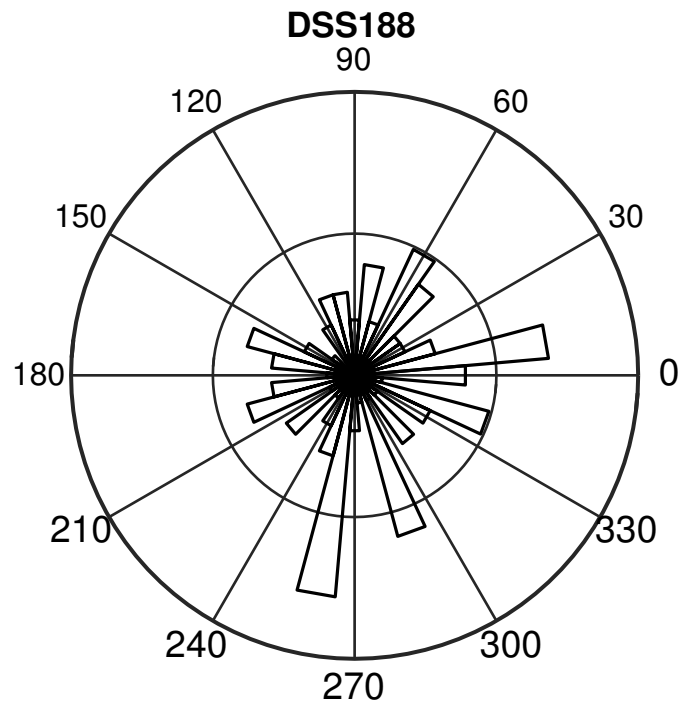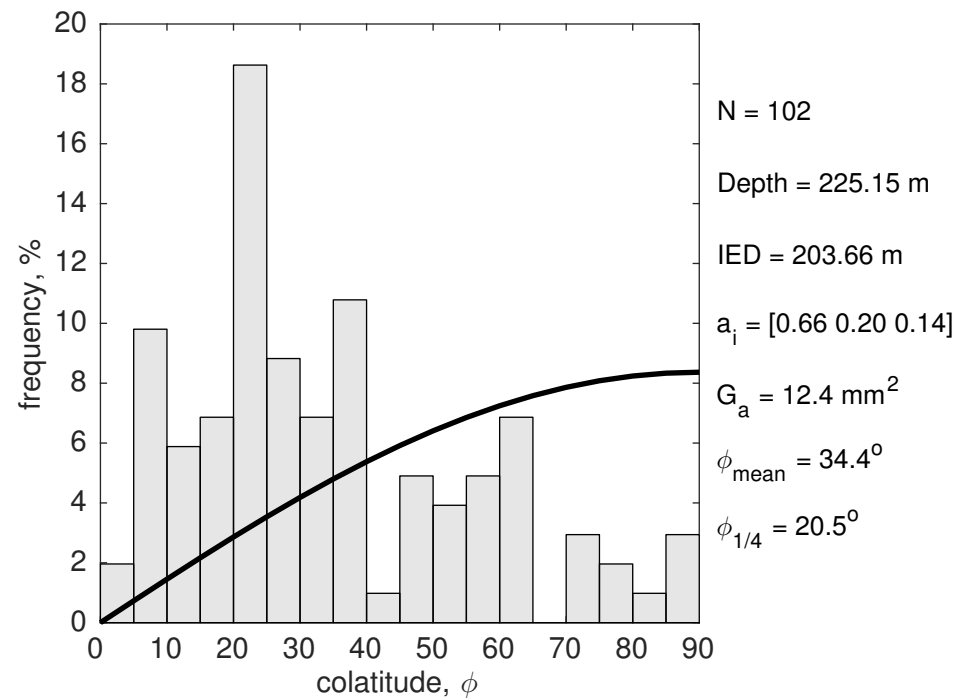

Supplement: Supplementary file 174 [file essd-2015-45-supplement.zip]

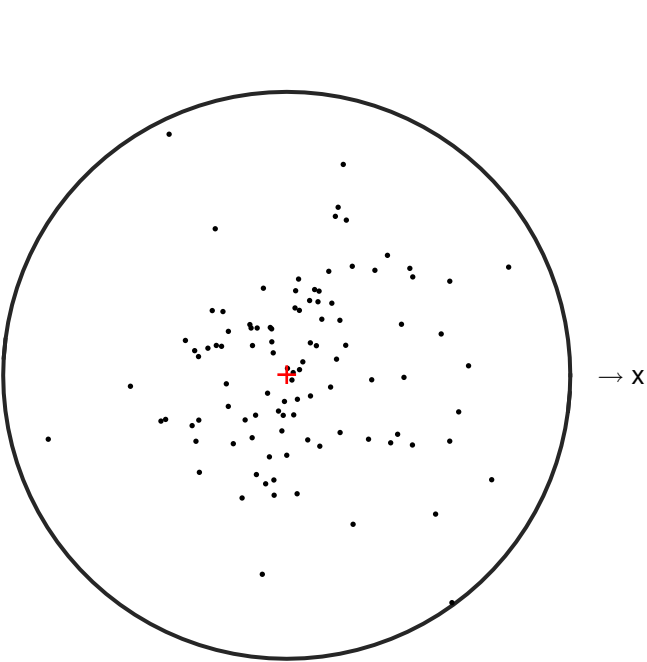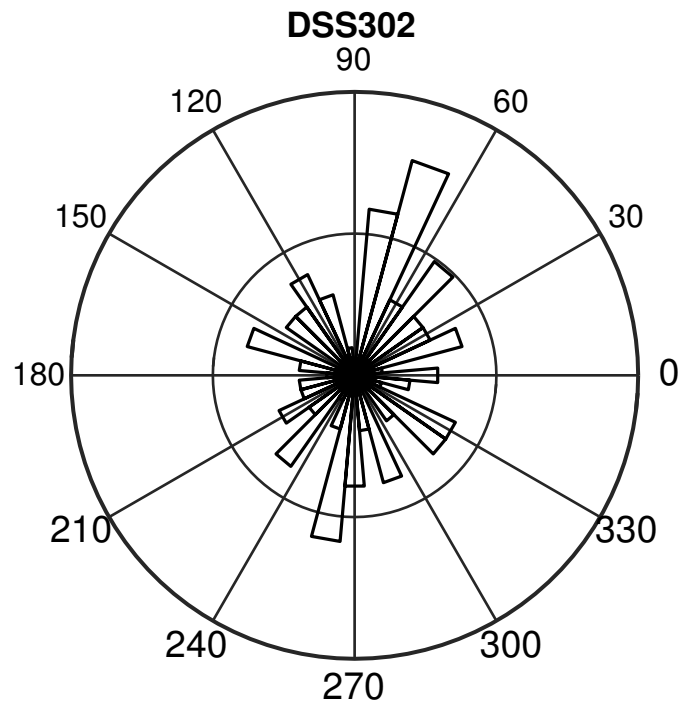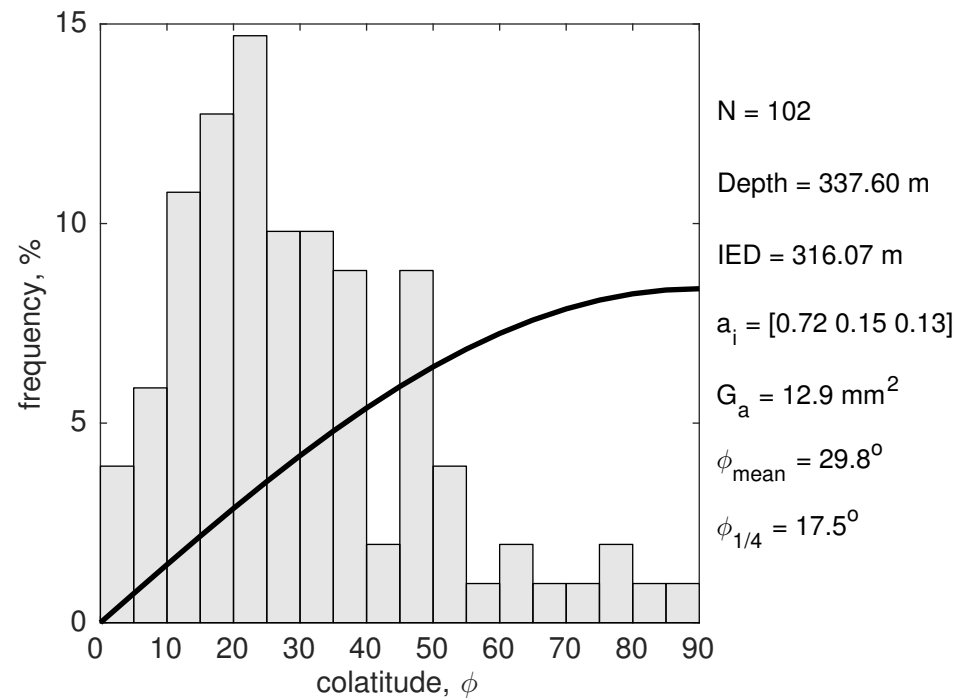

Supplement: Supplementary file 175 [file essd-2015-45-supplement.zip]

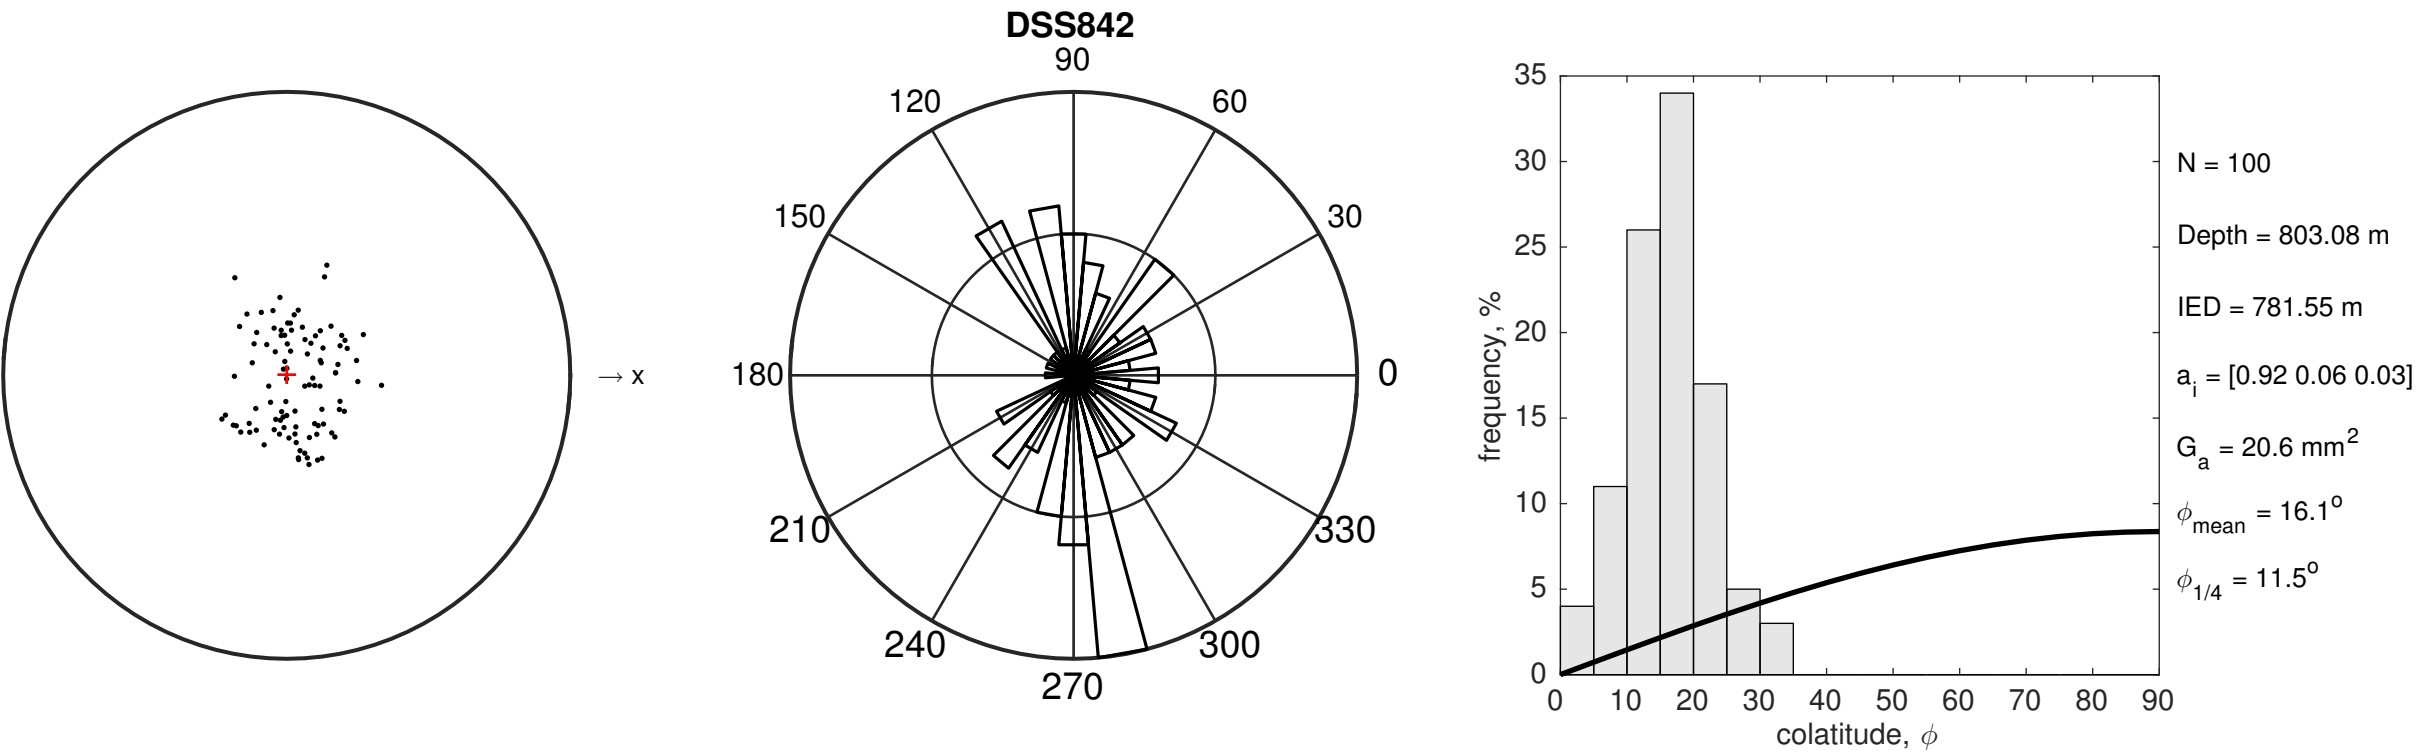

Supplement: Supplementary file 176 [file essd-2015-45-supplement.zip]

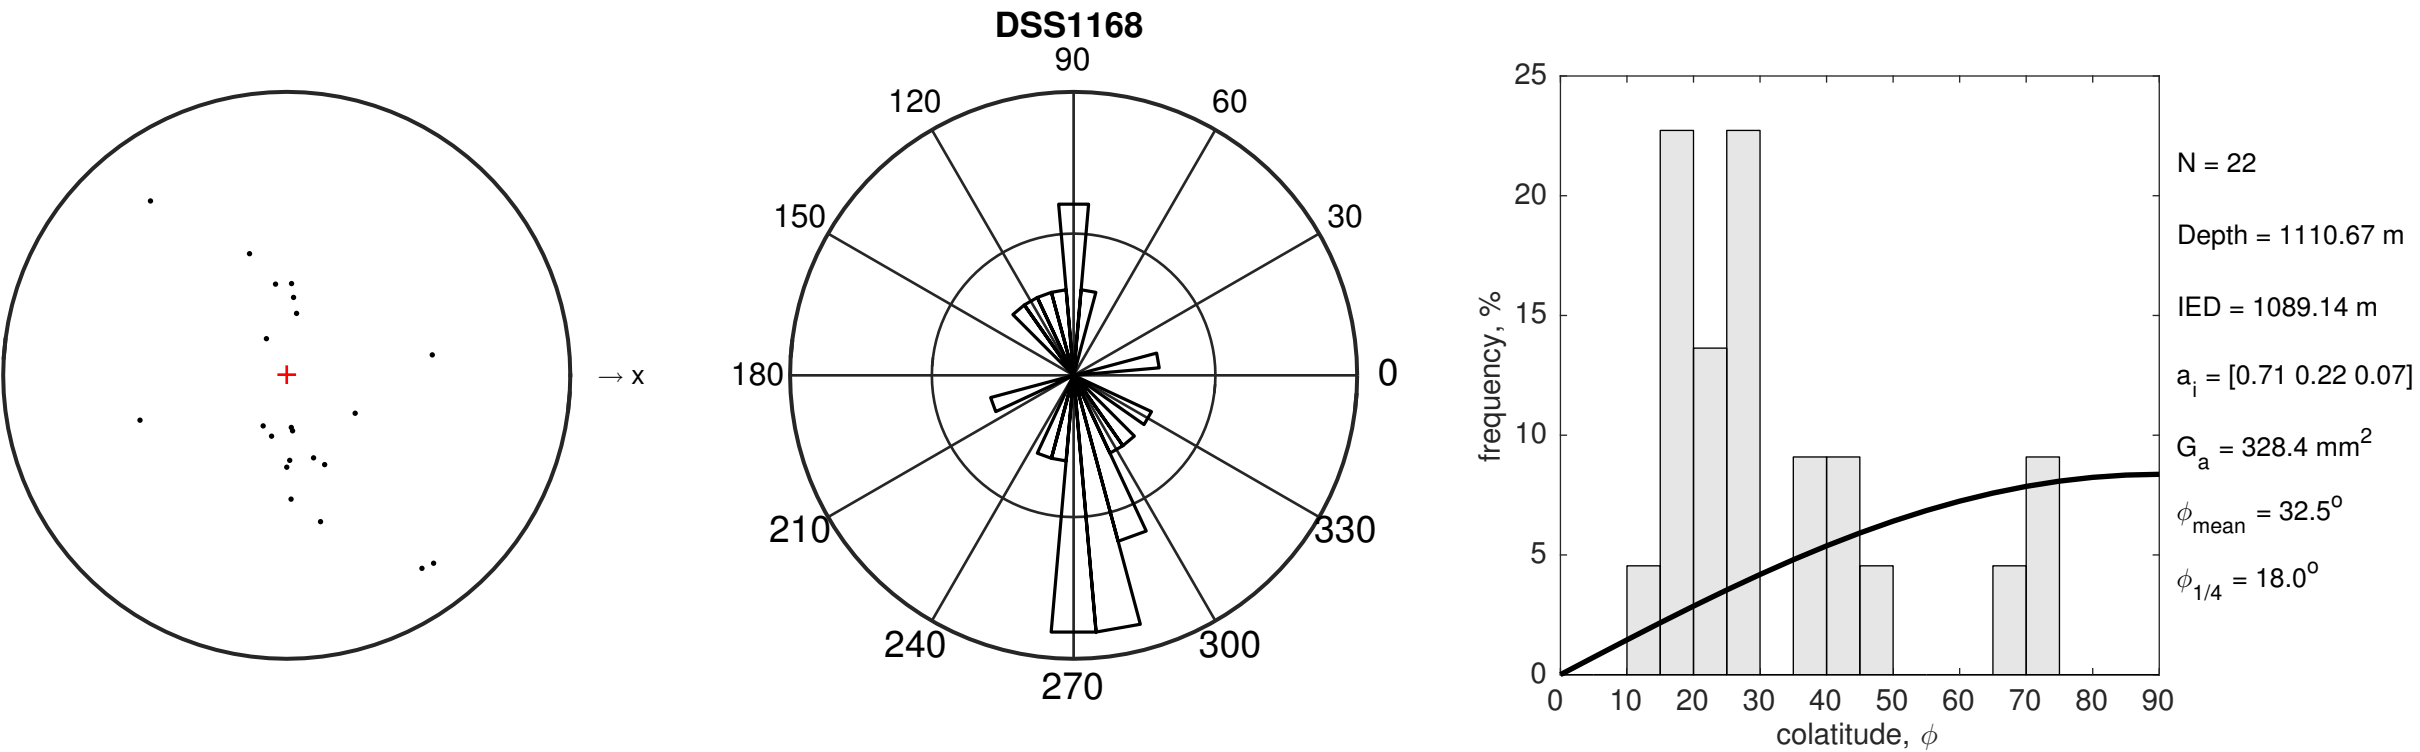

Supplement: Supplementary file 177 [file essd-2015-45-supplement.zip]

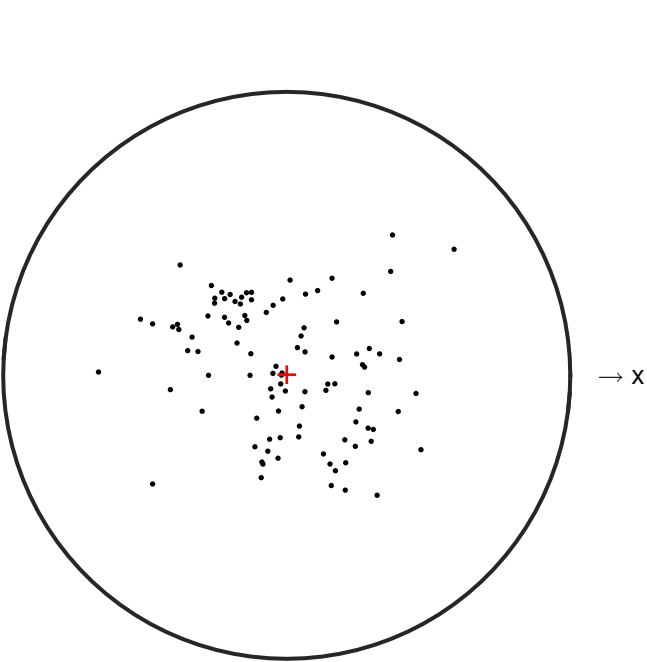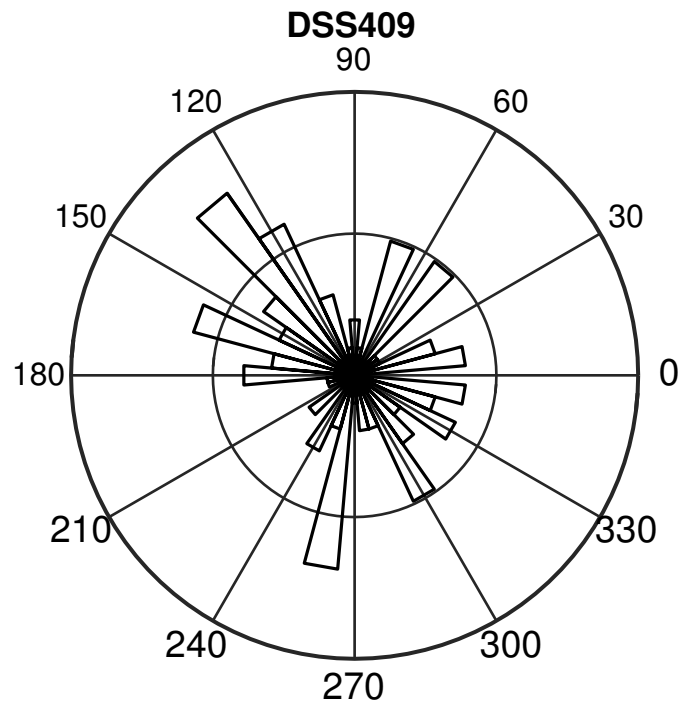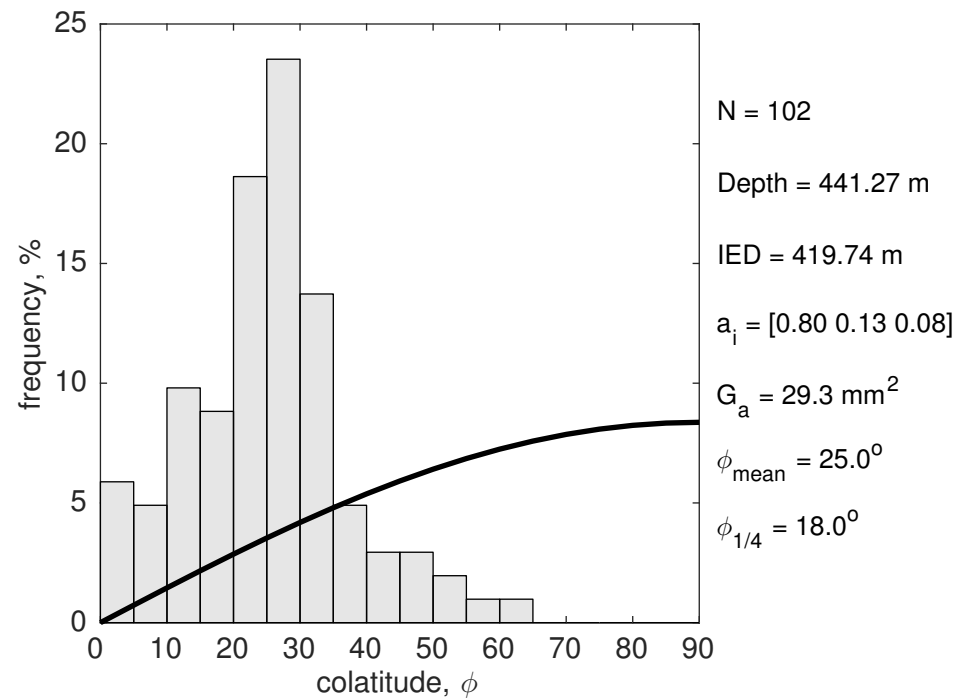

Supplement: Supplementary file 178 [file essd-2015-45-supplement.zip]

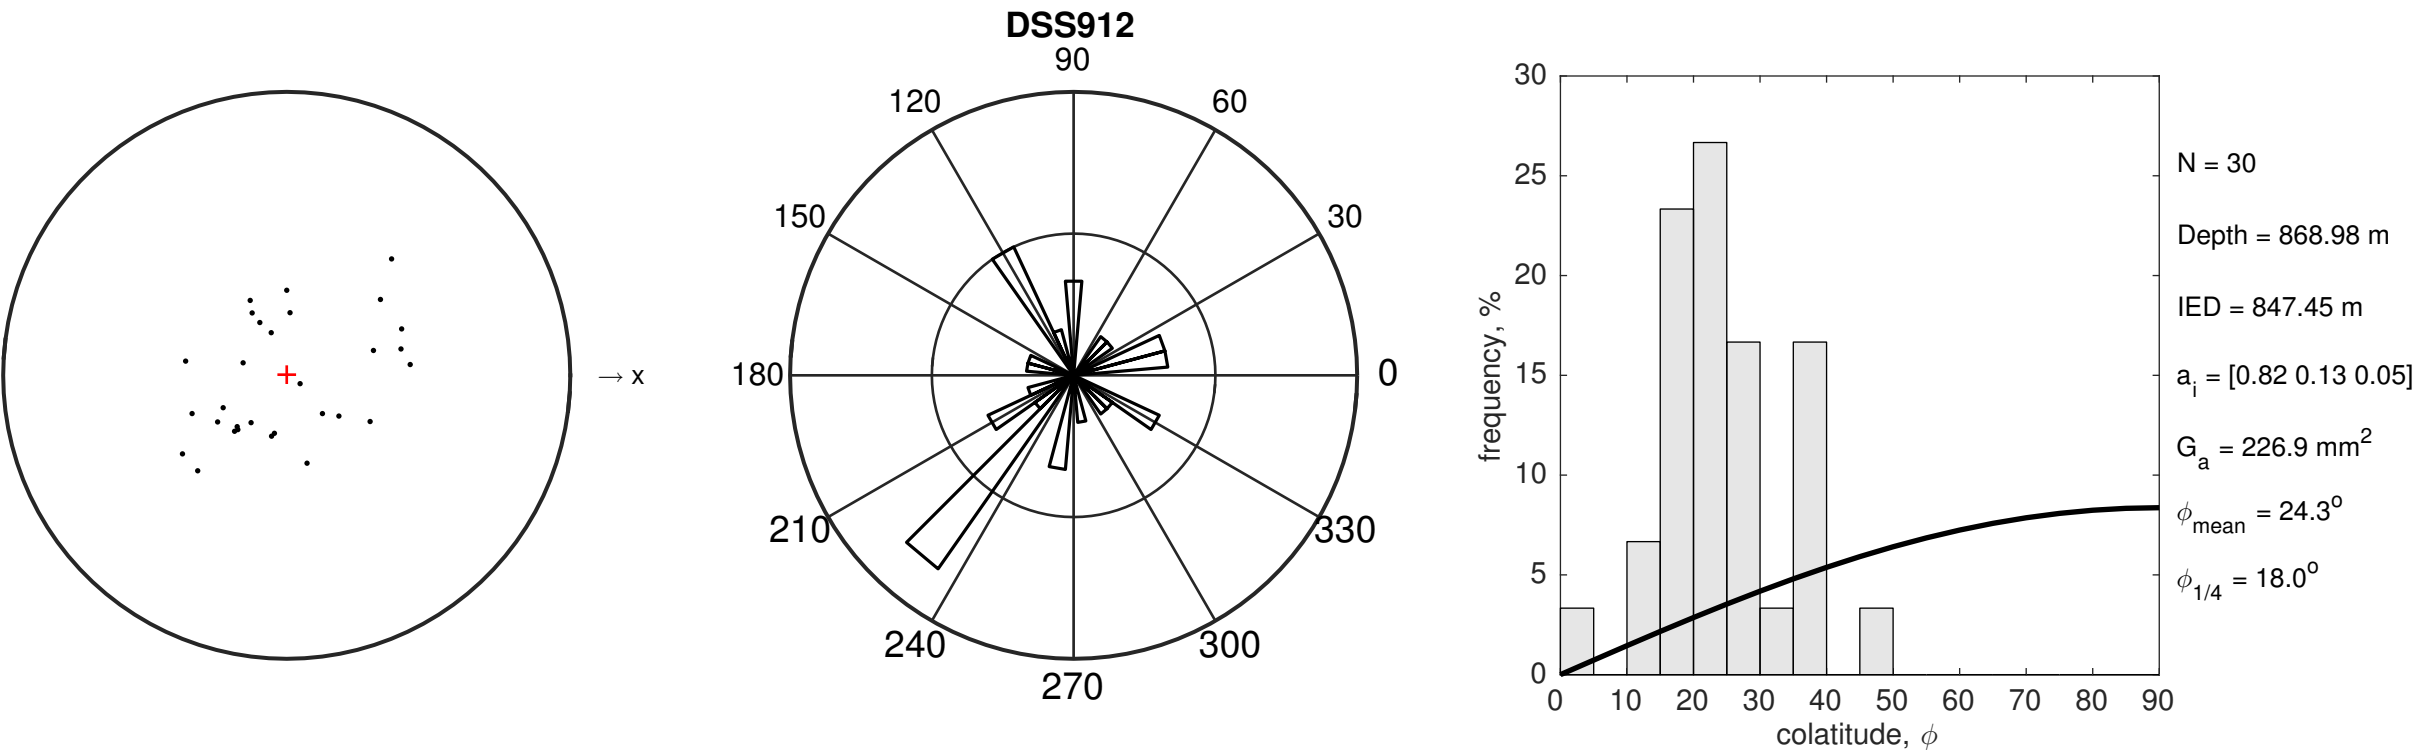

Supplement: Supplementary file 179 [file essd-2015-45-supplement.zip]

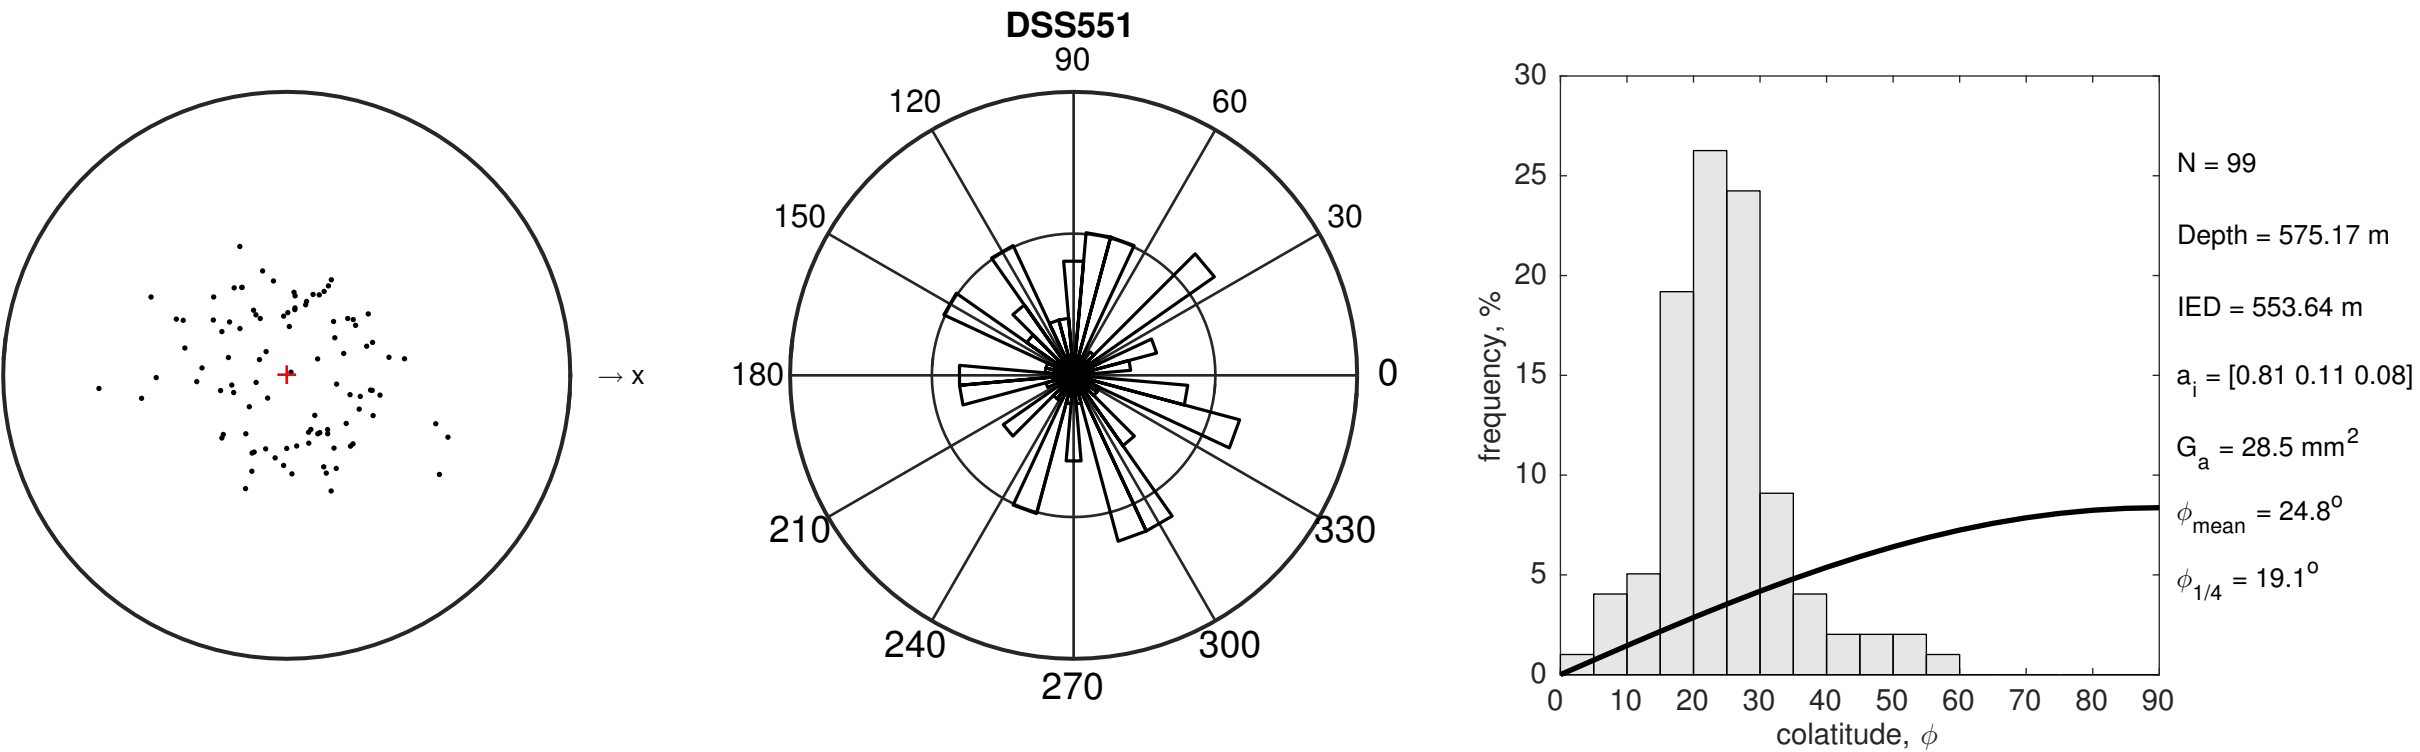

Supplement: Supplementary file 180 [file essd-2015-45-supplement.zip]

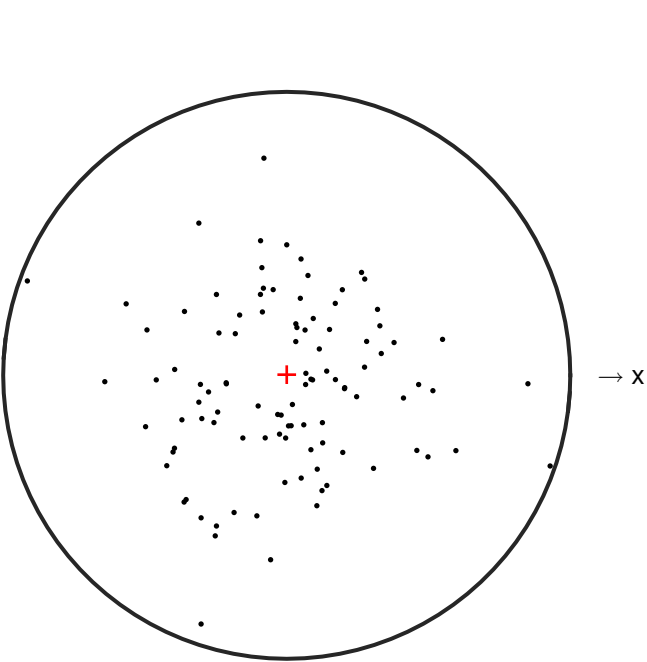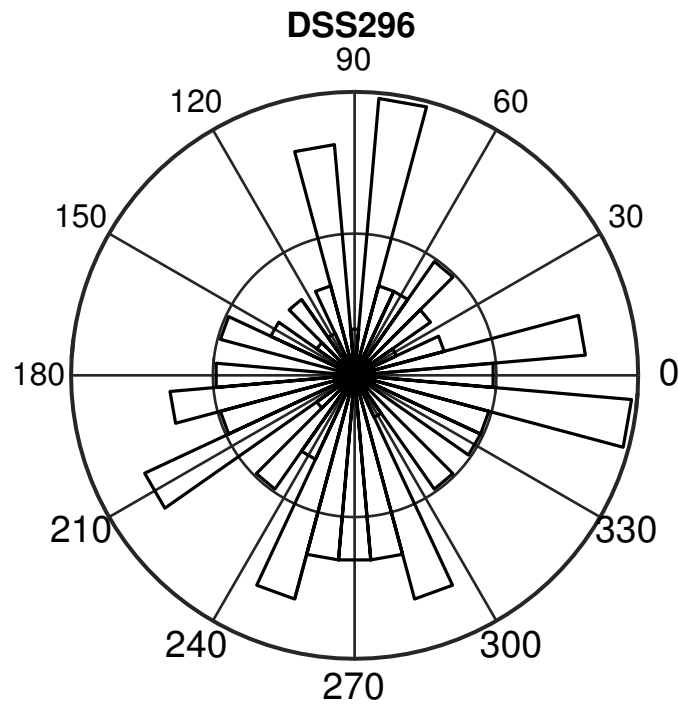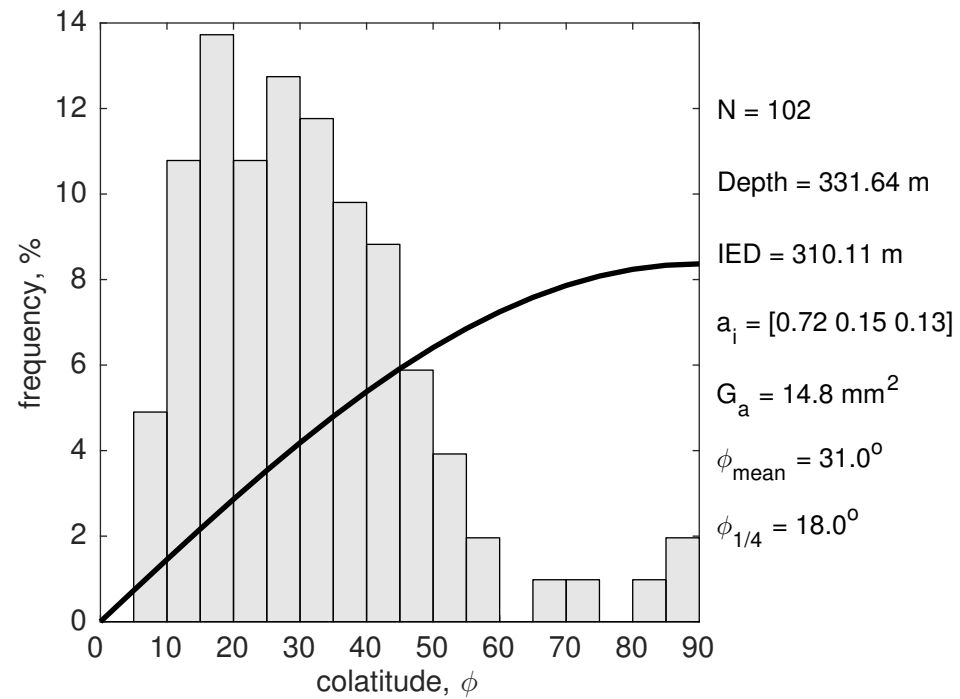

Supplement: Supplementary file 181 [file essd-2015-45-supplement.zip]

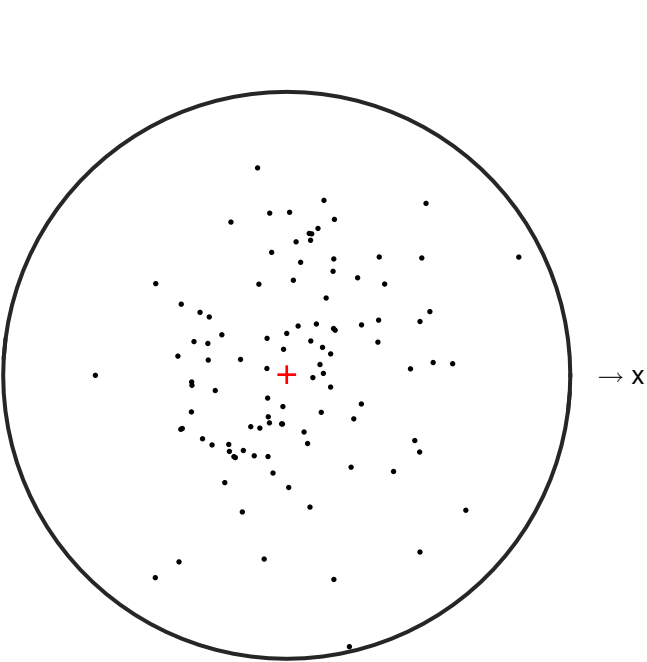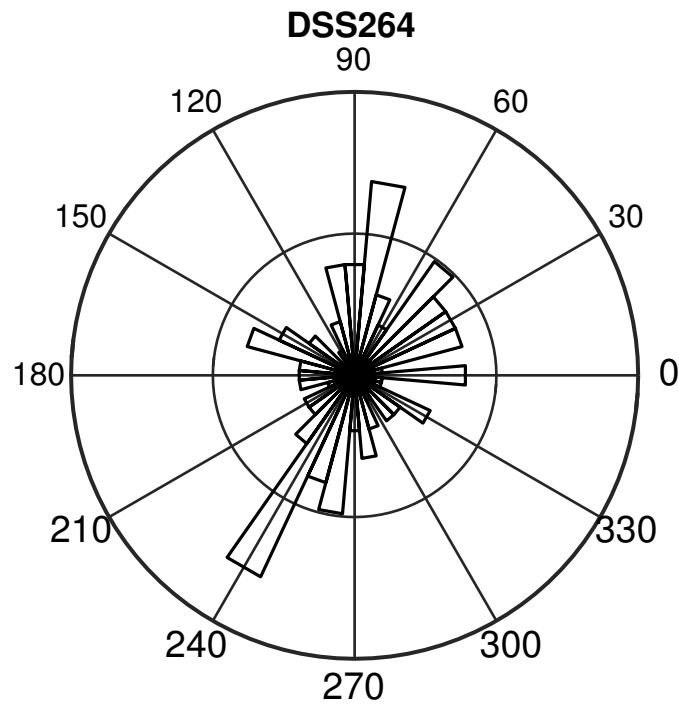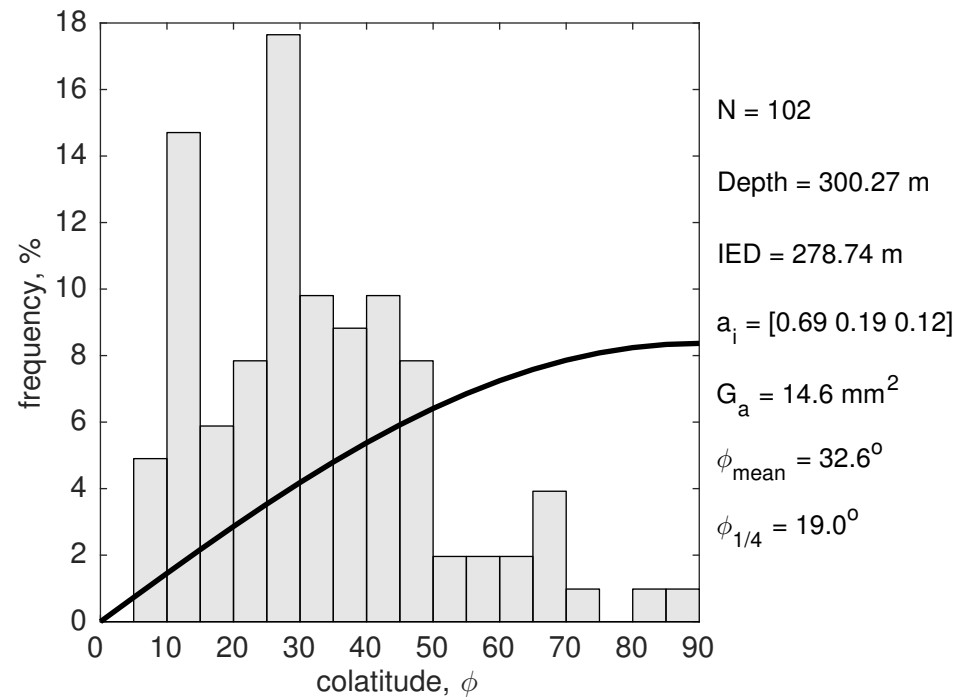

Supplement: Supplementary file 182 [file essd-2015-45-supplement.zip]

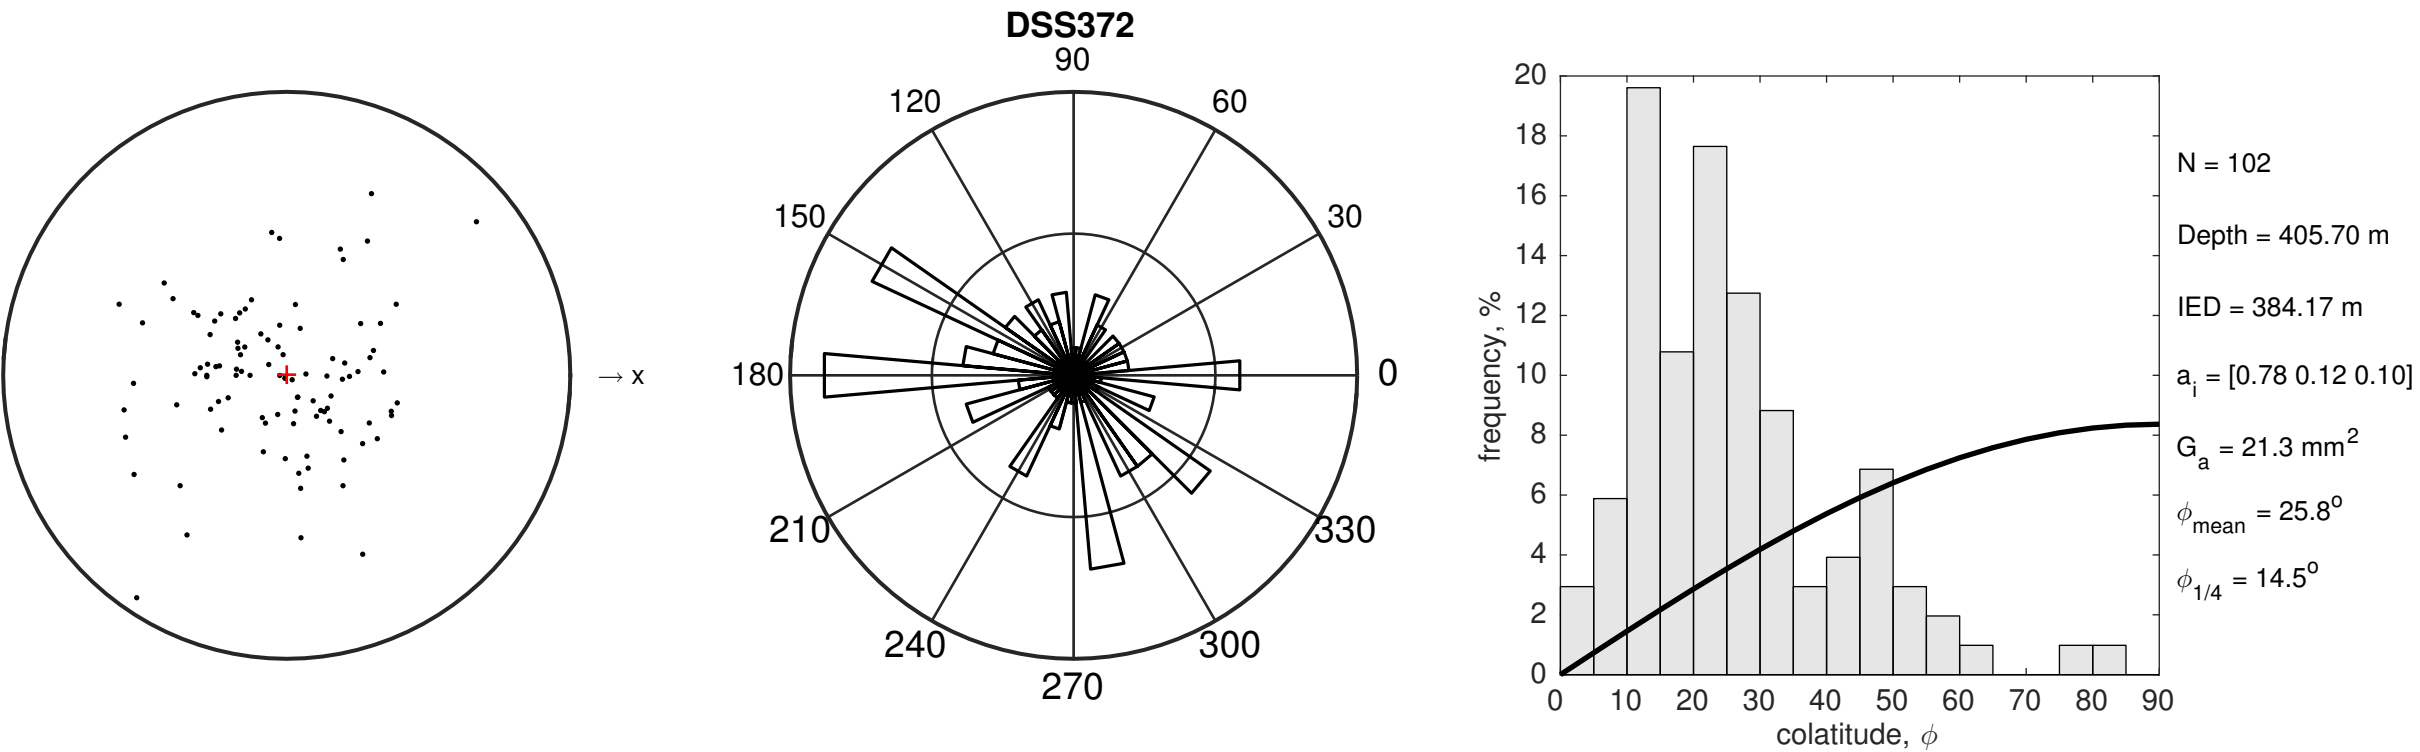

Supplement: Supplementary file 183 [file essd-2015-45-supplement.zip]

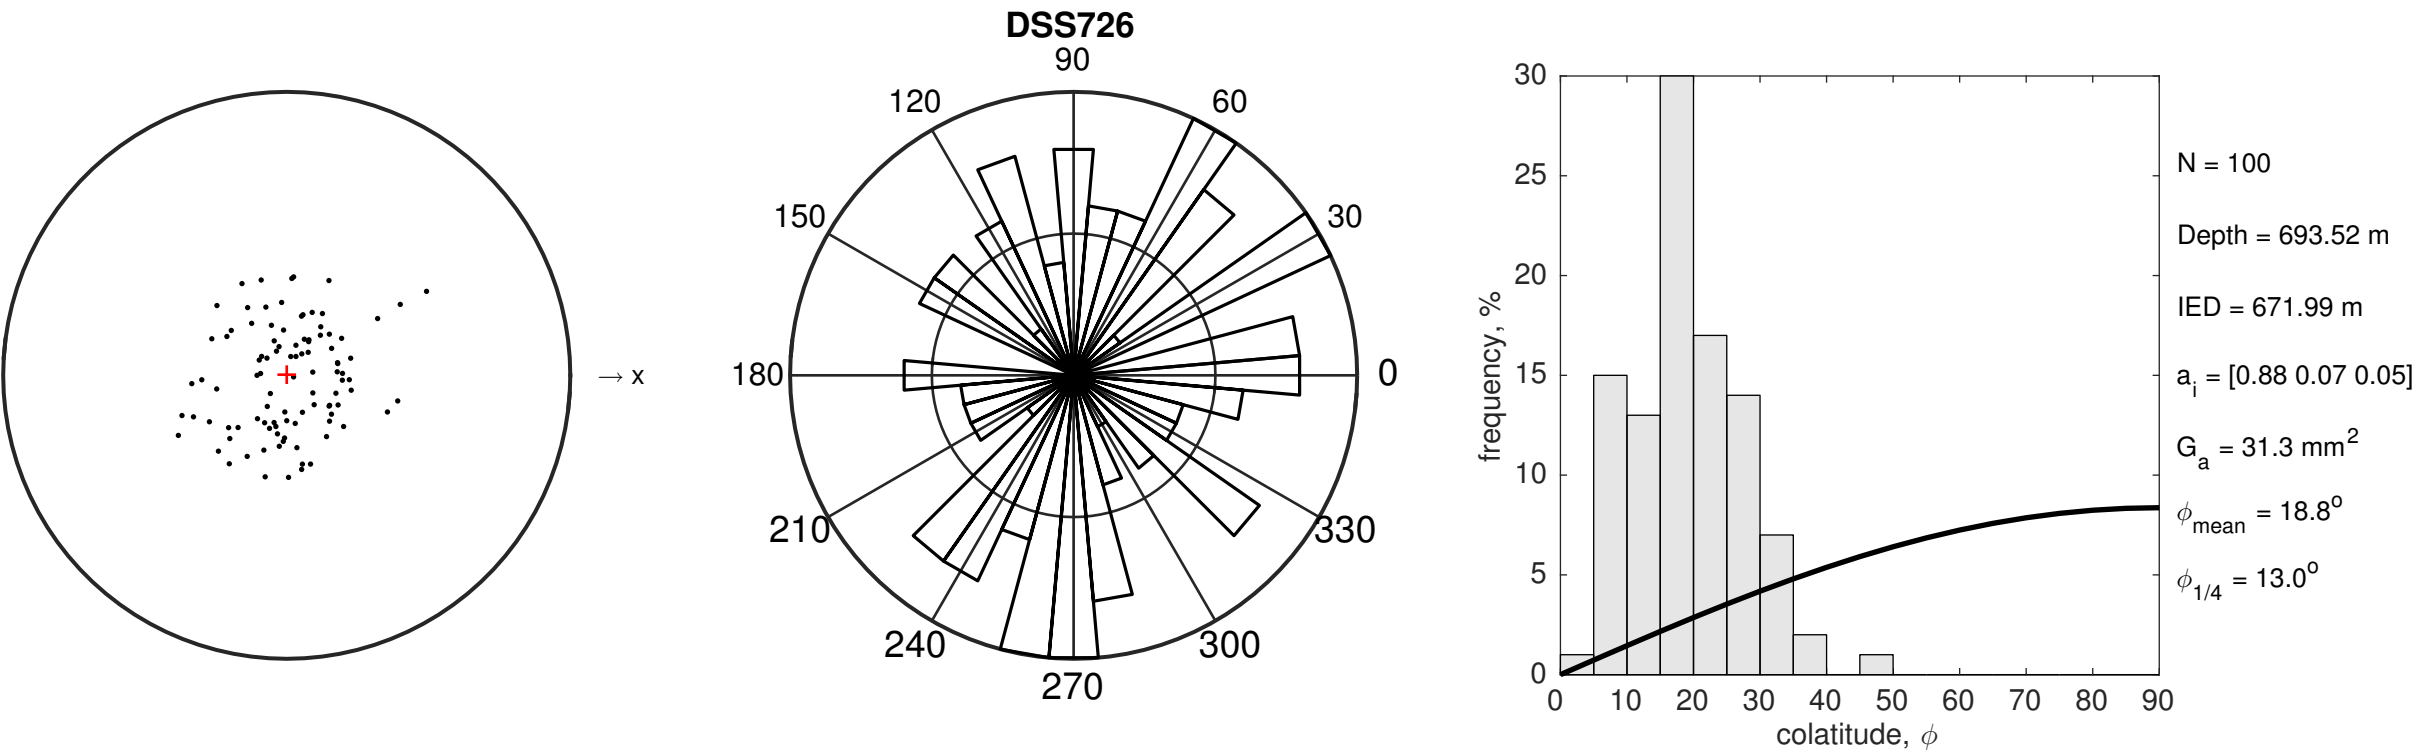

Supplement: Supplementary file 184 [file essd-2015-45-supplement.zip]

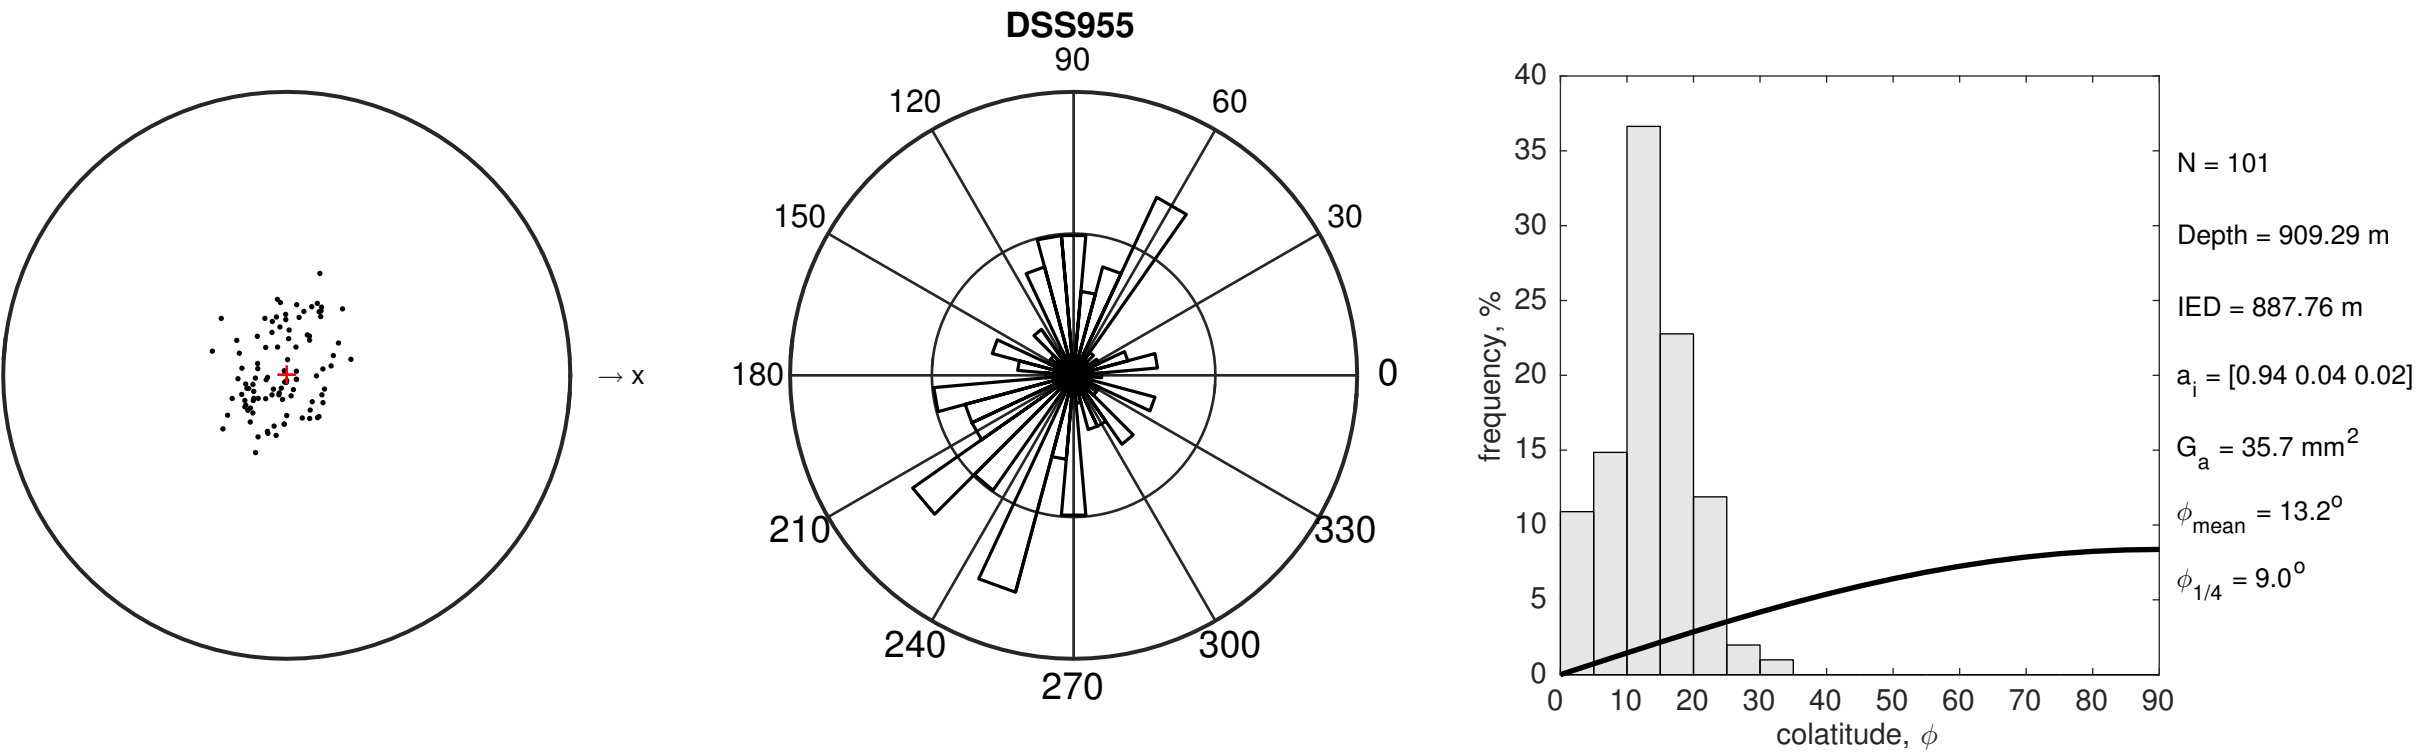

Supplement: Supplementary file 185 [file essd-2015-45-supplement.zip]

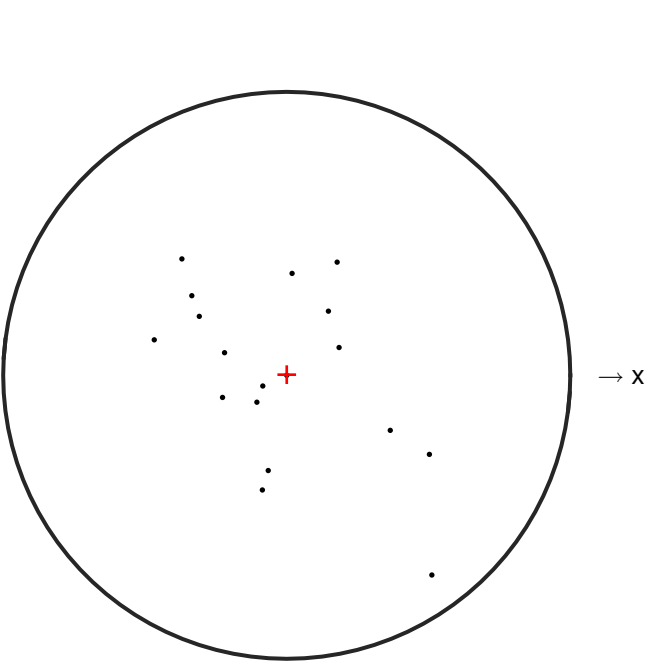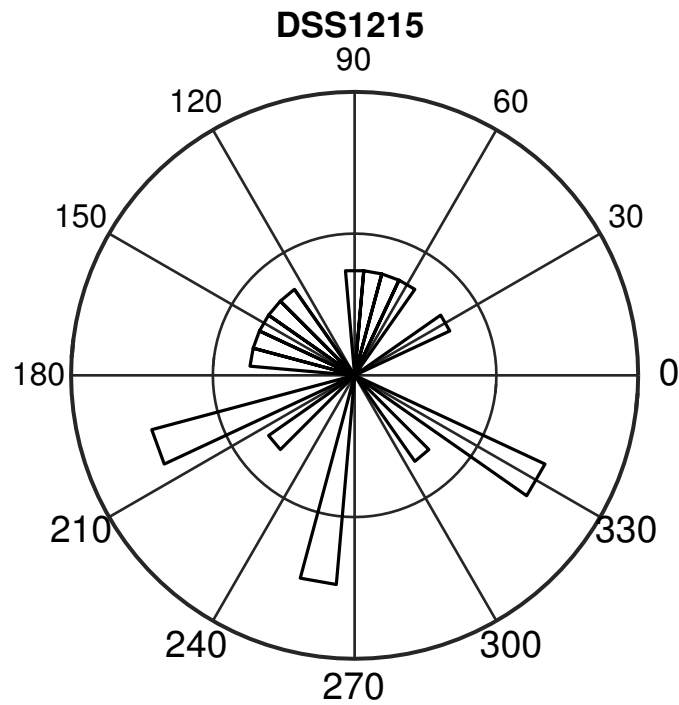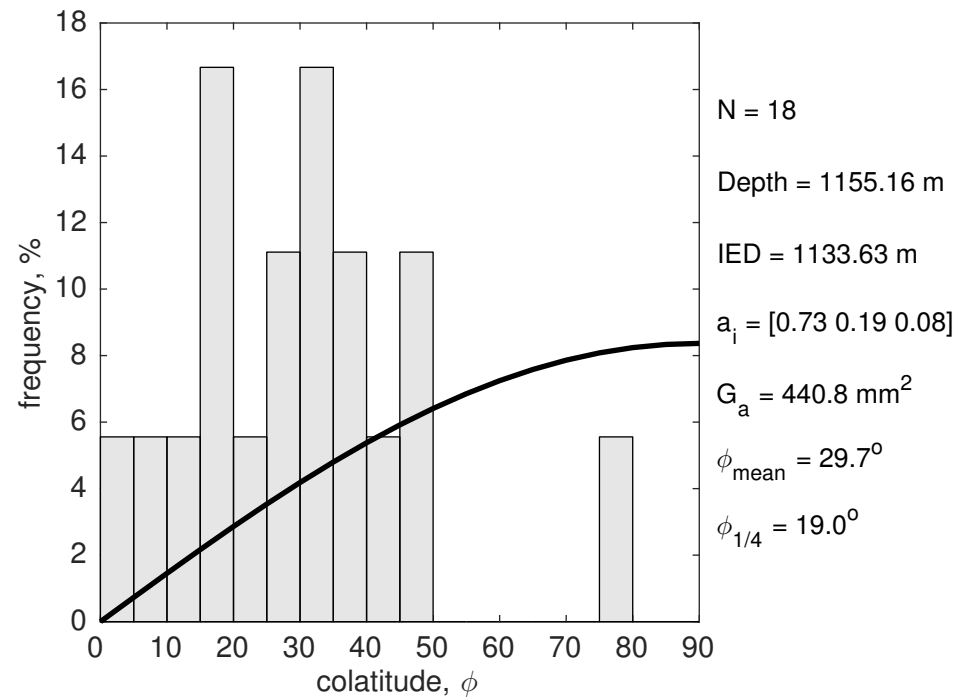

Supplement: Supplementary file 186 [file essd-2015-45-supplement.zip]
